# Supplementary material for: A Map of Multi-omics Quantitative Trait Loci in a Chinese Population Reveals Regulatory Variations and Disease Links
Source: Research Square preprint supplement (doi:10.21203/rs.3.rs-8193543/v1), 2026-01-06
Supplement: Supplementary file 1 [file 355a4d053af5445e9143c47b.xlsx]

## Sheet: Overview
Overview of Supplementary Tables
Supplementary Table	Description
Table S1	Characteristics of the CAS Cohort
Table S2	Details of 365 proteins in the CAS Cohort (measured by Olink Target Inflammation panel)
Table S3	Summary statistics of sentinel pQTLs
Table S4	Proportion of variance explained by independent lead pQTLs
Table S5	Previous proteomic studies for assessing signal novelty
Table S6	Bonferroni significant GGM edge and PPI confience score
Table S7	Summary statistics of protein ratio QTLs
Table S8	Details of 841 metabolites in the CAS Cohort
Table S9	Summary of metabQTLs identified in this study
Table S10	Genomic inflation factors (λ) for metabolites and metabolite ratios
Table S11	Estimated heritability for 841 metabolites
Table S12	Previously identified metabQTLs (pre-2021 curated by Yin et al. and Chen et al.; post-2021 manual curation)
Table S13	Summary of 256 metabolite ratios
Table S14	Summary of metabolite ratio QTLs
Table S15	Previously identified metabolite ratio QTLs
Table S16	Estimated heritability for 256 metabolite ratios
Table S17	Colocalization of meQTLs and pQTLs (PP.H4 > 0.75)
Table S18	Colocalization of meQTLs and metabQTLs (PP.H4 > 0.75)
Table S19	Colocalization of pQTLs and metabQTLs (PP.H4 > 0.75)
Table S20	Colocalization of meQTLs and eQTLs (eQTLGen; PP.H4 > 0.75)
Table S21	Colocalization of meQTLs and eQTLs (GTEx; PP.H4 > 0.75)
Table S22	Colocalization of pQTLs and eQTLs (eQTLGen; PP.H4 > 0.75)
Table S23	Colocalization of pQTLs and eQTLs (GTEx; PP.H4 > 0.75)
Table S24	Colocalization of metabQTLs and eQTLs (eQTLGen; PP.H4 > 0.75)
Table S25	Colocalization of metabQTLs and eQTLs (GTEx; PP.H4 > 0.75)
Table S26	Results from mediation analyses
Table S27	Results from partial correlation analyses
Table S28	Instrumental variables for protein MR analyses
Table S29	Instrumental variables for metabolite MR analyses
Table S30	Details of 220 BBJ complex traits
Table S31	Forward and reverse MR results for protein-outcome associations (Bonferroni-significant)
Table S32	Forward and reverse MR results for metabolite-outcome associations (Bonferroni-significant)
Table S33	Alignment between observational and MR estimates for protein-outcome relationships
Table S34	Alignment between observational and MR estimates for metabolite-outcome relationships

## Sheet: Table S1
Table S1: Characteristics of the CAS Cohort
	CAS cohort
Sociodemographic
N	3102
Age (years)	39.8±10.9
Sex (% Female)	0.509
Race	Chinese (94.3% Han)
Education
Master or higher	0.735
Other	0.265
Anthropometry
Height (cm)	167.2±8.1
Weight (kg)	66.7±12.6
Waist (cm)	81.7±10.2
BMI (kg/m2)	23.7±3.4
SBP (mmHg)	119.1±14.8
DBP (mmHg)	78.9±10.6
Lifestyle factors
Smoking status
Non-smoker	0.934
Former/current smoker	0.066
Regular drinking of beverages
Alcohol (weekly/daily)	0.055
Tea (weekly/daily)	0.384
Coffee (weekly/daily)	0.239
Physical activities
Never/occasionally	0.495
Weekly/daily	0.505
Sleep duration (hours)	7.2±1.6
Biochemical traits
Total cholesterol (mmol/l)	5.12±1.00
Triglycerides (mmol/l)	1.36±1.11
High-density lipoprotein cholesterol (mmol/l)	1.42±0.33
Low-density lipoprotein cholesterol (mmol/l)	2.94±0.79
Fasting glucose (mmol/l)	5.06±0.87
Uric acid (μmol/l)	344.1±96.0
Creatinine (μmol/l)	70.9±14.6

## Sheet: Table S2
Table S2: Details of 365 proteins in the CAS Cohort (measured by Olink Target Inflammation panel)
Olink name	Uniprot ID	Uniprot long name	Ensembl gene ID	gene symbol	chromosome (hg19)	Proportin of samples above LOD (%)	Genomic inflation factors (λ)
ACTN4	O43707	Alpha-actinin-4 (Non-muscle alpha-actinin 4)	ENSG00000130402	ACTN4	19	0	0.976
ADA	P00813	Adenosine deaminase (EC 3.5.4.4) (Adenosine aminohydrolase)	ENSG00000196839	ADA	20	1	0.992
ADAM23	O75077	Disintegrin and metalloproteinase domain-containing protein 23 (ADAM 23) (Metalloproteinase-like, disintegrin-like, and cysteine-rich protein 3) (MDC-3)	ENSG00000114948	ADAM23	2	1	0.996
ADGRE2	Q9UHX3	Adhesion G protein-coupled receptor E2 (EGF-like module receptor 2) (EGF-like module-containing mucin-like hormone receptor-like 2) (CD antigen CD312)	ENSG00000127507	EMR2	19	1	1.006
AGER	Q15109	Advanced glycosylation end product-specific receptor (Receptor for advanced glycosylation end products)	ENSG00000204305	AGER	6	1	1
AGRN	O00468	Agrin [Cleaved into: Agrin N-terminal 110 kDa subunit; Agrin C-terminal 110 kDa subunit; Agrin C-terminal 90 kDa fragment (C90); Agrin C-terminal 22 kDa fragment (C22)]	ENSG00000188157	AGRN	1	1	0.99
AGRP	O00253	Agouti-related protein	ENSG00000159723	AGRP	16	1	1.008
ALDH3A1	P30838	Aldehyde dehydrogenase, dimeric NADP-preferring (EC 1.2.1.5) (ALDHIII) (Aldehyde dehydrogenase 3) (Aldehyde dehydrogenase family 3 member A1)	ENSG00000108602	ALDH3A1	17	0	1.002
AMBN	Q9NP70	Ameloblastin	ENSG00000178522	AMBN	4	0.25	1.012
AMN	Q9BXJ7	Protein amnionless [Cleaved into: Soluble protein amnionless]	ENSG00000166126	AMN	14	0	0.986
ANGPT1	Q15389	Angiopoietin-1 (ANG-1)	ENSG00000154188	ANGPT1	8	1	0.994
ANGPTL2	Q9UKU9	Angiopoietin-related protein 2 (Angiopoietin-like protein 2)	ENSG00000136859	ANGPTL2	9	1	1.003
ANGPTL4	Q9BY76	Angiopoietin-related protein 4 (Angiopoietin-like protein 4) (Hepatic fibrinogen/angiopoietin-related protein) (HFARP) [Cleaved into: ANGPTL4 N-terminal chain; ANGPTL4 C-terminal chain]	ENSG00000167772	ANGPTL4	19	1	0.99
ANXA11	P50995	Annexin A11 (56 kDa autoantigen) (Annexin XI) (Annexin-11) (Calcyclin-associated annexin 50) (CAP-50)	ENSG00000122359	ANXA11	10	1	1.012
AOC1	P19801	Amiloride-sensitive amine oxidase [copper-containing] (DAO) (Diamine oxidase) (EC 1.4.3.22) (Amiloride-binding protein 1) (Amine oxidase copper domain-containing protein 1) (Histaminase) (Kidney amine oxidase) (KAO)	ENSG00000002726	AOC1	7	0	1.001
ARHGEF12	Q9NZN5	Rho guanine nucleotide exchange factor 12 (Leukemia-associated RhoGEF)	ENSG00000196914	ARHGEF12	11	0	0.977
ARNT	P27540	Aryl hydrocarbon receptor nuclear translocator (ARNT protein) (Class E basic helix-loop-helix protein 2) (bHLHe2) (Dioxin receptor, nuclear translocator) (Hypoxia-inducible factor 1-beta) (HIF-1-beta) (HIF1-beta)	ENSG00000143437	ARNT	1	0	0.992
ARTN	Q5T4W7	Artemin (Enovin) (Neublastin)	ENSG00000117407	ARTN	1	0	0.998
ATP5IF1	Q9UII2	ATPase inhibitor, mitochondrial (ATP synthase F1 subunit epsilon) (Inhibitor of F(1)F(o)-ATPase) (IF(1)) (IF1)	ENSG00000130770	ATPIF1	1	0.333333	0.998
AXIN1	O15169	Axin-1 (Axis inhibition protein 1) (hAxin)	ENSG00000103126	AXIN1	16	0	1.003
B4GALT1	P15291	Beta-1,4-galactosyltransferase 1 (Beta-1,4-GalTase 1) (Beta4Gal-T1) (b4Gal-T1) (EC 2.4.1.-) (Beta-N-acetylglucosaminyl-glycolipid beta-1,4-galactosyltransferase) (Beta-N-acetylglucosaminylglycopeptide beta-1,4-galactosyltransferase) (EC 2.4.1.38) (Lactose synthase A protein) (EC 2.4.1.22) (N-acetyllactosamine synthase) (EC 2.4.1.90) (Nal synthase) (Neolactotriaosylceramide beta-1,4-galactosyltran…	ENSG00000086062	B4GALT1	9	1	0.991
BACH1	O14867	Transcription regulator protein BACH1 (BTB and CNC homolog 1) (HA2303)	ENSG00000156273	BACH1	21	0	0.995
BANK1	Q8NDB2	B-cell scaffold protein with ankyrin repeats	ENSG00000153064	BANK1	4	1	0.989
BCR	P11274	Breakpoint cluster region protein (EC 2.7.11.1) (Renal carcinoma antigen NY-REN-26)	ENSG00000186716	BCR	22	0	0.989
BSG	P35613	Basigin (5F7) (Collagenase stimulatory factor) (Extracellular matrix metalloproteinase inducer) (EMMPRIN) (Hepatoma-associated antigen) (HAb18G) (Leukocyte activation antigen M6) (OK blood group antigen) (Tumor cell-derived collagenase stimulatory factor) (TCSF) (CD antigen CD147)	ENSG00000172270	BSG	19	1	0.995
BTN2A1	Q7KYR7	Butyrophilin subfamily 2 member A1	ENSG00000112763	BTN2A1	6	1	1.005
BTN3A2	P78410	Butyrophilin subfamily 3 member A2	ENSG00000186470	BTN3A2	6	1	0.997
C1QA	P02745	Complement C1q subcomponent subunit A	ENSG00000173372	C1QA	1	1	1.006
CASP2	P42575	Caspase-2 (CASP-2) (EC 3.4.22.55) (Neural precursor cell expressed developmentally down-regulated protein 2) (NEDD-2) (Protease ICH-1) [Cleaved into: Caspase-2 subunit p18; Caspase-2 subunit p13; Caspase-2 subunit p12]	ENSG00000106144	CASP2	7	0	0.998
CCL11	P51671	Eotaxin (C-C motif chemokine 11) (Eosinophil chemotactic protein) (Small-inducible cytokine A11)	ENSG00000172156	CCL11	17	1	1.014
CCL13	Q99616	C-C motif chemokine 13 (CK-beta-10) (Monocyte chemoattractant protein 4) (Monocyte chemotactic protein 4) (MCP-4) (NCC-1) (Small-inducible cytokine A13) [Cleaved into: C-C motif chemokine 13, long chain; C-C motif chemokine 13, medium chain; C-C motif chemokine 13, short chain]	ENSG00000181374	CCL13	17	1	0.984
CCL17	Q92583	C-C motif chemokine 17 (CC chemokine TARC) (Small-inducible cytokine A17) (Thymus and activation-regulated chemokine)	ENSG00000102970	CCL17	16	1	0.993
CCL20	P78556	C-C motif chemokine 20 (Beta-chemokine exodus-1) (CC chemokine LARC) (Liver and activation-regulated chemokine) (Macrophage inflammatory protein 3 alpha) (MIP-3-alpha) (Small-inducible cytokine A20) [Cleaved into: CCL20(1-67); CCL20(1-64); CCL20(2-70)]	ENSG00000115009	CCL20	2	1	0.99
CCL21	O00585	C-C motif chemokine 21 (6Ckine) (Beta-chemokine exodus-2) (Secondary lymphoid-tissue chemokine) (SLC) (Small-inducible cytokine A21)	ENSG00000137077	CCL21	9	1	0.975
CCL22	O00626	C-C motif chemokine 22 (CC chemokine STCP-1) (MDC(1-69)) (Macrophage-derived chemokine) (Small-inducible cytokine A22) (Stimulated T-cell chemotactic protein 1) [Cleaved into: MDC(3-69); MDC(5-69); MDC(7-69)]	ENSG00000102962	CCL22	16	1	0.994
CCL23	P55773	C-C motif chemokine 23 (CK-beta-8) (CKB-8) (Macrophage inflammatory protein 3) (MIP-3) (Myeloid progenitor inhibitory factor 1) (MPIF-1) (Small-inducible cytokine A23) [Cleaved into: CCL23(19-99); CCL23(22-99); CCL23(27-99); CCL23(30-99)]	ENSG00000167236	CCL23	17	1	1.001
CCL24	O00175	C-C motif chemokine 24 (CK-beta-6) (Eosinophil chemotactic protein 2) (Eotaxin-2) (Myeloid progenitor inhibitory factor 2) (MPIF-2) (Small-inducible cytokine A24)	ENSG00000106178	CCL24	7	1	0.991
CCL25	O15444	C-C motif chemokine 25 (Chemokine TECK) (Small-inducible cytokine A25) (Thymus-expressed chemokine)	ENSG00000131142	CCL25	19	1	0.99
CCL26	Q9Y258	C-C motif chemokine 26 (CC chemokine IMAC) (Eotaxin-3) (Macrophage inflammatory protein 4-alpha) (MIP-4-alpha) (Small-inducible cytokine A26) (Thymic stroma chemokine-1) (TSC-1)	ENSG00000006606	CCL26	7	1	1.015
CCL28	Q9NRJ3	C-C motif chemokine 28 (Mucosae-associated epithelial chemokine) (MEC) (Protein CCK1) (Small-inducible cytokine A28)	ENSG00000151882	CCL28	5	1	0.981
CCL3	P10147	C-C motif chemokine 3 (G0/G1 switch regulatory protein 19-1) (Macrophage inflammatory protein 1-alpha) (MIP-1-alpha) (PAT 464.1) (SIS-beta) (Small-inducible cytokine A3) (Tonsillar lymphocyte LD78 alpha protein) [Cleaved into: MIP-1-alpha(4-69) (LD78-alpha(4-69))]	ENSG00000006075	CCL3	17	1	0.987
CCL4	P13236	C-C motif chemokine 4 (G-26 T-lymphocyte-secreted protein) (HC21) (Lymphocyte activation gene 1 protein) (LAG-1) (MIP-1-beta(1-69)) (Macrophage inflammatory protein 1-beta) (MIP-1-beta) (PAT 744) (Protein H400) (SIS-gamma) (Small-inducible cytokine A4) (T-cell activation protein 2) (ACT-2) [Cleaved into: MIP-1-beta(3-69)]	ENSG00000129277	CCL4	17	1	0.997
CCL7	P80098	C-C motif chemokine 7 (Monocyte chemoattractant protein 3) (Monocyte chemotactic protein 3) (MCP-3) (NC28) (Small-inducible cytokine A7)	ENSG00000108688	CCL7	17	1	1.006
CCN2	P29279	CCN family member 2 (Cellular communication network factor 2) (Connective tissue growth factor) (Hypertrophic chondrocyte-specific protein 24) (Insulin-like growth factor-binding protein 8) (IBP-8) (IGF-binding protein 8) (IGFBP-8)	ENSG00000118523	CTGF	6	1	0.997
CD160	O95971	CD160 antigen (Natural killer cell receptor BY55) (CD antigen CD160) [Cleaved into: CD160 antigen, soluble form]	ENSG00000117281	CD160	1	1	0.985
CD200	P41217	OX-2 membrane glycoprotein (CD antigen CD200)	ENSG00000091972	CD200	3	1	0.987
CD200R1	Q8TD46	Cell surface glycoprotein CD200 receptor 1 (CD200 cell surface glycoprotein receptor) (Cell surface glycoprotein OX2 receptor 1)	ENSG00000163606	CD200R1	3	1	0.996
CD22	P20273	B-cell receptor CD22 (B-lymphocyte cell adhesion molecule) (BL-CAM) (Sialic acid-binding Ig-like lectin 2) (Siglec-2) (T-cell surface antigen Leu-14) (CD antigen CD22)	ENSG00000012124	CD22	19	1	0.981
CD244	Q9BZW8	Natural killer cell receptor 2B4 (NK cell activation-inducing ligand) (NAIL) (NK cell type I receptor protein 2B4) (NKR2B4) (h2B4) (SLAM family member 4) (SLAMF4) (Signaling lymphocytic activation molecule 4) (CD antigen CD244)	ENSG00000122223	CD244	1	1	0.988
CD276	Q5ZPR3	CD276 antigen (4Ig-B7-H3) (B7 homolog 3) (B7-H3) (Costimulatory molecule) (CD antigen CD276)	ENSG00000103855	CD276	15	1	0.993
CD4	P01730	T-cell surface glycoprotein CD4 (T-cell surface antigen T4/Leu-3) (CD antigen CD4)	ENSG00000010610	CD4	12	1	0.994
CD40	P25942	Tumor necrosis factor receptor superfamily member 5 (B-cell surface antigen CD40) (Bp50) (CD40L receptor) (CDw40) (CD antigen CD40)	ENSG00000101017	CD40	20	1	1.004
CD40LG	P29965	CD40 ligand (CD40-L) (T-cell antigen Gp39) (TNF-related activation protein) (TRAP) (Tumor necrosis factor ligand superfamily member 5) (CD antigen CD154) [Cleaved into: CD40 ligand, membrane form; CD40 ligand, soluble form (sCD40L)]	ENSG00000102245	CD40LG	X	1	0.984
CD48	P09326	CD48 antigen (B-lymphocyte activation marker BLAST-1) (BCM1 surface antigen) (Leukocyte antigen MEM-102) (SLAM family member 2) (SLAMF2) (Signaling lymphocytic activation molecule 2) (TCT.1) (CD antigen CD48)	ENSG00000117091	CD48	1	1	1.015
CD58	P19256	Lymphocyte function-associated antigen 3 (Ag3) (Surface glycoprotein LFA-3) (CD antigen CD58)	ENSG00000116815	CD58	1	1	1.001
CD6	P30203	T-cell differentiation antigen CD6 (T12) (TP120) (CD antigen CD6) [Cleaved into: Soluble CD6]	ENSG00000013725	CD6	11	1	0.99
CD70	P32970	CD70 antigen (CD27 ligand) (CD27-L) (Tumor necrosis factor ligand superfamily member 7) (CD antigen CD70)	ENSG00000125726	CD70	19	1	1
CD79B	P40259	B-cell antigen receptor complex-associated protein beta chain (B-cell-specific glycoprotein B29) (Ig-beta) (Immunoglobulin-associated B29 protein) (CD antigen CD79b)	ENSG00000007312	CD79B	17	1	1.001
CD83	Q01151	CD83 antigen (hCD83) (B-cell activation protein) (Cell surface protein HB15) (CD antigen CD83)	ENSG00000112149	CD83	6	1	0.999
CD84	Q9UIB8	SLAM family member 5 (Cell surface antigen MAX.3) (Hly9-beta) (Leukocyte differentiation antigen CD84) (Signaling lymphocytic activation molecule 5) (CD antigen CD84)	ENSG00000066294	CD84	1	1	0.991
CDON	Q4KMG0	Cell adhesion molecule-related/down-regulated by oncogenes	ENSG00000064309	CDON	11	1	1.008
CDSN	Q15517	Corneodesmosin (S protein)	ENSG00000204539	CDSN	6	1	0.988
CEACAM21	Q3KPI0	Carcinoembryonic antigen-related cell adhesion molecule 21	ENSG00000007129	CEACAM21	19	1	1.011
CEP164	Q9UPV0	Centrosomal protein of 164 kDa (Cep164)	ENSG00000110274	CEP164	11	0	0.999
CHRDL1	Q9BU40	Chordin-like protein 1 (Neuralin-1) (Neurogenesin-1) (Ventroptin)	ENSG00000101938	CHRDL1	X	1	0.988
CKAP4	Q07065	Cytoskeleton-associated protein 4 (63-kDa cytoskeleton-linking membrane protein) (Climp-63) (p63)	ENSG00000136026	CKAP4	12	1	1.005
CKMT1A	P12532	Creatine kinase U-type, mitochondrial (EC 2.7.3.2) (Acidic-type mitochondrial creatine kinase) (Mia-CK) (Ubiquitous mitochondrial creatine kinase) (U-MtCK)	ENSG00000237289	CKMT1B	15	1	0.992
CLEC4A	Q9UMR7	C-type lectin domain family 4 member A (C-type lectin DDB27) (C-type lectin superfamily member 6) (Dendritic cell immunoreceptor) (Lectin-like immunoreceptor) (CD antigen CD367)	ENSG00000111729	CLEC4A	12	1	0.992
CLEC4C	Q8WTT0	C-type lectin domain family 4 member C (Blood dendritic cell antigen 2) (BDCA-2) (C-type lectin superfamily member 7) (Dendritic lectin) (CD antigen CD303)	ENSG00000198178	CLEC4C	12	1	0.989
CLEC4D	Q8WXI8	C-type lectin domain family 4 member D (C-type lectin superfamily member 8) (C-type lectin-like receptor 6) (CLEC-6) (Dendritic cell-associated C-type lectin 3) (DC-associated C-type lectin 3) (Dectin-3) (CD antigen CD368)	ENSG00000166527	CLEC4D	12	1	0.988
CLEC4G	Q6UXB4	C-type lectin domain family 4 member G (Liver and lymph node sinusoidal endothelial cell C-type lectin) (LSECtin)	ENSG00000182566	CLEC4G	19	1	0.982
CLEC7A	Q9BXN2	C-type lectin domain family 7 member A (Beta-glucan receptor) (C-type lectin superfamily member 12) (Dendritic cell-associated C-type lectin 1) (DC-associated C-type lectin 1) (Dectin-1) (CD antigen CD369)	ENSG00000172243	CLEC7A	12	1	0.98
CLIP2	Q9UDT6	CAP-Gly domain-containing linker protein 2 (Cytoplasmic linker protein 115) (CLIP-115) (Cytoplasmic linker protein 2) (Williams-Beuren syndrome chromosomal region 3 protein) (Williams-Beuren syndrome chromosomal region 4 protein)	ENSG00000106665	CLIP2	7	0.833333	0.977
CLSTN2	Q9H4D0	Calsyntenin-2 (Alcadein-gamma) (Alc-gamma)	ENSG00000158258	CLSTN2	3	1	1.003
CNTNAP2	Q9UHC6	Contactin-associated protein-like 2 (Cell recognition molecule Caspr2)	ENSG00000174469	CNTNAP2	7	1	0.992
COL9A1	P20849	Collagen alpha-1(IX) chain	ENSG00000112280	COL9A1	6	0	1.011
COLEC12	Q5KU26	Collectin-12 (Collectin placenta protein 1) (CL-P1) (hCL-P1) (Nurse cell scavenger receptor 2) (Scavenger receptor class A member 4) (Scavenger receptor with C-type lectin)	ENSG00000158270	COLEC12	18	1	1.017
CRELD2	Q6UXH1	Protein disulfide isomerase CRELD2 (EC 5.3.4.1) (Cysteine-rich with EGF-like domain protein 2)	ENSG00000184164	CRELD2	22	1	1.016
CRHBP	P24387	Corticotropin-releasing factor-binding protein (CRF-BP) (CRF-binding protein) (Corticotropin-releasing hormone-binding protein) (CRH-BP)	ENSG00000145708	CRHBP	5	1	0.995
CRIM1	Q9NZV1	Cysteine-rich motor neuron 1 protein (CRIM-1) (Cysteine-rich repeat-containing protein S52) [Cleaved into: Processed cysteine-rich motor neuron 1 protein]	ENSG00000150938	CRIM1	2	1	1.006
CRKL	P46109	Crk-like protein	ENSG00000099942	CRKL	22	1	0.989
CRLF1	O75462	Cytokine receptor-like factor 1 (Cytokine-like factor 1) (CLF-1) (ZcytoR5)	ENSG00000006016	CRLF1	19	1	1.001
CSF1	P09603	Macrophage colony-stimulating factor 1 (CSF-1) (M-CSF) (MCSF) (Lanimostim) (Proteoglycan macrophage colony-stimulating factor) (PG-M-CSF) [Cleaved into: Processed macrophage colony-stimulating factor 1; Macrophage colony-stimulating factor 1 43 kDa subunit]	ENSG00000184371	CSF1	1	1	0.991
CSF3	P09919	Granulocyte colony-stimulating factor (G-CSF) (Pluripoietin) (Filgrastim) (Lenograstim)	ENSG00000108342	CSF3	17	0.833333	1.003
CST7	O76096	Cystatin-F (Cystatin-7) (Cystatin-like metastasis-associated protein) (CMAP) (Leukocystatin)	ENSG00000077984	CST7	20	1	0.988
CTRC	Q99895	Chymotrypsin-C (EC 3.4.21.2) (Caldecrin)	ENSG00000162438	CTRC	1	1	1.003
CTSC	P53634	Dipeptidyl peptidase 1 (EC 3.4.14.1) (Cathepsin C) (Cathepsin J) (Dipeptidyl peptidase I) (DPP-I) (DPPI) (Dipeptidyl transferase) [Cleaved into: Dipeptidyl peptidase 1 exclusion domain chain (Dipeptidyl peptidase I exclusion domain chain); Dipeptidyl peptidase 1 heavy chain (Dipeptidyl peptidase I heavy chain); Dipeptidyl peptidase 1 light chain (Dipeptidyl peptidase I light chain)]	ENSG00000109861	CTSC	11	0.916667	0.994
CTSO	P43234	Cathepsin O (EC 3.4.22.42)	ENSG00000256043	CTSO	4	1	1.014
CXADR	P78310	Coxsackievirus and adenovirus receptor (CAR) (hCAR) (CVB3-binding protein) (Coxsackievirus B-adenovirus receptor) (HCVADR)	ENSG00000154639	CXADR	21	1	0.979
CXCL1	P09341	Growth-regulated alpha protein (C-X-C motif chemokine 1) (GRO-alpha(1-73)) (Melanoma growth stimulatory activity) (MGSA) (Neutrophil-activating protein 3) (NAP-3) [Cleaved into: GRO-alpha(4-73); GRO-alpha(5-73); GRO-alpha(6-73)]	ENSG00000163739	CXCL1	4	1	1.007
CXCL10	P02778	C-X-C motif chemokine 10 (10 kDa interferon gamma-induced protein) (Gamma-IP10) (IP-10) (Small-inducible cytokine B10) [Cleaved into: CXCL10(1-73)]	ENSG00000169245	CXCL10	4	1	0.996
CXCL12	P48061	Stromal cell-derived factor 1 (SDF-1) (hSDF-1) (C-X-C motif chemokine 12) (Intercrine reduced in hepatomas) (IRH) (hIRH) (Pre-B cell growth-stimulating factor) (PBSF) [Cleaved into: SDF-1-beta(3-72); SDF-1-alpha(3-67)]	ENSG00000107562	CXCL12	10	1	0.994
CXCL14	O95715	C-X-C motif chemokine 14 (Chemokine BRAK) (MIP-2G) (Small-inducible cytokine B14)	ENSG00000145824	CXCL14	5	0	1.003
CXCL17	Q6UXB2	C-X-C motif chemokine 17 (6-Cys CXCL17) (Dendritic cell and monocyte chemokine-like protein) (DMC) (VEGF coregulated chemokine 1) [Cleaved into: 4-Cys CXCL17]	ENSG00000189377	CXCL17	19	1	0.992
CXCL3	P19876	C-X-C motif chemokine 3 (GRO-gamma(1-73)) (Growth-regulated protein gamma) (GRO-gamma) (Macrophage inflammatory protein 2-beta) (MIP2-beta) [Cleaved into: GRO-gamma(5-73)]	ENSG00000163734	CXCL3	4	1	0.991
CXCL6	P80162	C-X-C motif chemokine 6 (Chemokine alpha 3) (CKA-3) (Granulocyte chemotactic protein 2) (GCP-2) (Small-inducible cytokine B6) [Cleaved into: Small-inducible cytokine B6, N-processed variant 1; Small-inducible cytokine B6, N-processed variant 2; Small-inducible cytokine B6, N-processed variant 3]	ENSG00000124875	CXCL6	4	1	0.984
CXCL8	P10145	Interleukin-8 (IL-8) (C-X-C motif chemokine 8) (Chemokine (C-X-C motif) ligand 8) (Emoctakin) (Granulocyte chemotactic protein 1) (GCP-1) (Monocyte-derived neutrophil chemotactic factor) (MDNCF) (Monocyte-derived neutrophil-activating peptide) (MONAP) (Neutrophil-activating protein 1) (NAP-1) (Protein 3-10C) (T-cell chemotactic factor) [Cleaved into: MDNCF-a (GCP/IL-8 protein IV) (IL8/NAP1 form I…	ENSG00000169429	IL8	4	1	1.015
CXCL9	Q07325	C-X-C motif chemokine 9 (Gamma-interferon-induced monokine) (Monokine induced by interferon-gamma) (HuMIG) (MIG) (Small-inducible cytokine B9)	ENSG00000138755	CXCL9	4	1	1.004
DAG1	Q14118	Dystroglycan 1 (Dystroglycan) (Dystrophin-associated glycoprotein 1) [Cleaved into: Alpha-dystroglycan (Alpha-DG); Beta-dystroglycan (Beta-DG)]	ENSG00000173402	DAG1	3	1	0.985
DAPP1	Q9UN19	Dual adapter for phosphotyrosine and 3-phosphotyrosine and 3-phosphoinositide (hDAPP1) (B lymphocyte adapter protein Bam32) (B-cell adapter molecule of 32 kDa)	ENSG00000070190	DAPP1	4	0.75	0.991
DBNL	Q9UJU6	Drebrin-like protein (Cervical SH3P7) (Cervical mucin-associated protein) (Drebrin-F) (HPK1-interacting protein of 55 kDa) (HIP-55) (SH3 domain-containing protein 7)	ENSG00000136279	DBNL	7	1	1.002
DECR1	Q16698	2,4-dienoyl-CoA reductase [(3E)-enoyl-CoA-producing], mitochondrial (EC 1.3.1.124) (2,4-dienoyl-CoA reductase [NADPH]) (4-enoyl-CoA reductase [NADPH]) (Short chain dehydrogenase/reductase family 18C member 1)	ENSG00000104325	DECR1	8	1	1.006
DFFA	O00273	DNA fragmentation factor subunit alpha (DNA fragmentation factor 45 kDa subunit) (DFF-45) (Inhibitor of CAD) (ICAD)	ENSG00000160049	DFFA	1	1	1.001
DGKZ	Q13574	Diacylglycerol kinase zeta (DAG kinase zeta) (EC 2.7.1.107) (Diglyceride kinase zeta) (DGK-zeta)	ENSG00000149091	DGKZ	11	0	1
DNAJA2	O60884	DnaJ homolog subfamily A member 2 (Cell cycle progression restoration gene 3 protein) (Dnj3) (Dj3) (HIRA-interacting protein 4) (Renal carcinoma antigen NY-REN-14)	ENSG00000069345	DNAJA2	16	0	0.99
DNER	Q8NFT8	Delta and Notch-like epidermal growth factor-related receptor	ENSG00000187957	DNER	2	1	1.008
DNPH1	O43598	2'-deoxynucleoside 5'-phosphate N-hydrolase 1 (EC 3.2.2.-) (c-Myc-responsive protein RCL)	ENSG00000112667	DNPH1	6	1	1.009
DPP10	Q8N608	Inactive dipeptidyl peptidase 10 (Dipeptidyl peptidase IV-related protein 3) (DPRP-3) (Dipeptidyl peptidase X) (DPP X) (Dipeptidyl peptidase-like protein 2) (DPL2)	ENSG00000175497	DPP10	2	0.916667	1.012
EDAR	Q9UNE0	Tumor necrosis factor receptor superfamily member EDAR (Anhidrotic ectodysplasin receptor 1) (Downless homolog) (EDA-A1 receptor) (Ectodermal dysplasia receptor) (Ectodysplasin-A receptor)	ENSG00000135960	EDAR	2	1	0.995
EGF	P01133	Pro-epidermal growth factor (EGF) [Cleaved into: Epidermal growth factor (Urogastrone)]	ENSG00000138798	EGF	4	1	0.981
EGLN1	Q9GZT9	Egl nine homolog 1 (EC 1.14.11.29) (Hypoxia-inducible factor prolyl hydroxylase 2) (HIF-PH2) (HIF-prolyl hydroxylase 2) (HPH-2) (Prolyl hydroxylase domain-containing protein 2) (PHD2) (SM-20)	ENSG00000135766	EGLN1	1	0.75	0.994
EIF4G1	Q04637	Eukaryotic translation initiation factor 4 gamma 1 (eIF-4-gamma 1) (eIF-4G 1) (eIF-4G1) (p220)	ENSG00000114867	EIF4G1	3	1	0.983
EIF5A	P63241	Eukaryotic translation initiation factor 5A-1 (eIF-5A-1) (eIF-5A1) (Eukaryotic initiation factor 5A isoform 1) (eIF-5A) (Rev-binding factor) (eIF-4D)	ENSG00000132507	EIF5A	17	0	0.997
ENAH	Q8N8S7	Protein enabled homolog	ENSG00000154380	ENAH	1	0.583333	1.012
ENPP5	Q9UJA9	Ectonucleotide pyrophosphatase/phosphodiesterase family member 5 (E-NPP 5) (NPP-5) (EC 3.1.-.-)	ENSG00000112796	ENPP5	6	1	0.992
ENPP7	Q6UWV6	Ectonucleotide pyrophosphatase/phosphodiesterase family member 7 (E-NPP 7) (NPP-7) (EC 3.1.4.12) (Alkaline sphingomyelin phosphodiesterase) (Intestinal alkaline sphingomyelinase) (Alk-SMase)	ENSG00000182156	ENPP7	17	1	0.998
EPCAM	P16422	Epithelial cell adhesion molecule (Ep-CAM) (Adenocarcinoma-associated antigen) (Cell surface glycoprotein Trop-1) (Epithelial cell surface antigen) (Epithelial glycoprotein) (EGP) (Epithelial glycoprotein 314) (EGP314) (hEGP314) (KS 1/4 antigen) (KSA) (Major gastrointestinal tumor-associated protein GA733-2) (Tumor-associated calcium signal transducer 1) (CD antigen CD326)	ENSG00000119888	EPCAM	2	1	0.99
EPHA1	P21709	Ephrin type-A receptor 1 (hEpha1) (EC 2.7.10.1) (EPH tyrosine kinase) (EPH tyrosine kinase 1) (Erythropoietin-producing hepatoma receptor) (Tyrosine-protein kinase receptor EPH)	ENSG00000146904	EPHA1	7	1	1.003
EPO	P01588	Erythropoietin (Epoetin)	ENSG00000130427	EPO	7	0.0833333	0.984
ERBB3	P21860	Receptor tyrosine-protein kinase erbB-3 (EC 2.7.10.1) (Proto-oncogene-like protein c-ErbB-3) (Tyrosine kinase-type cell surface receptor HER3)	ENSG00000065361	ERBB3	12	1	1
ESM1	Q9NQ30	Endothelial cell-specific molecule 1 (ESM-1)	ENSG00000164283	ESM1	5	1	0.987
F2R	P25116	Proteinase-activated receptor 1 (PAR-1) (Coagulation factor II receptor) (Thrombin receptor)	ENSG00000181104	F2R	5	1	0.989
FABP1	P07148	Fatty acid-binding protein, liver (Fatty acid-binding protein 1) (Liver-type fatty acid-binding protein) (L-FABP)	ENSG00000163586	FABP1	2	1	0.995
FABP9	Q0Z7S8	Fatty acid-binding protein 9 (Testis lipid-binding protein) (TLBP) (Testis-type fatty acid-binding protein) (T-FABP)	ENSG00000205186	FABP9	8	1	0.989
FASLG	P48023	Tumor necrosis factor ligand superfamily member 6 (Apoptosis antigen ligand) (APTL) (CD95 ligand) (CD95-L) (Fas antigen ligand) (Fas ligand) (FasL) (CD antigen CD178) [Cleaved into: Tumor necrosis factor ligand superfamily member 6, membrane form; Tumor necrosis factor ligand superfamily member 6, soluble form (Receptor-binding FasL ectodomain) (Soluble Fas ligand) (sFasL); ADAM10-processed FasL …	ENSG00000117560	FASLG	1	1	0.995
FCAR	P24071	Immunoglobulin alpha Fc receptor (IgA Fc receptor) (CD antigen CD89)	ENSG00000186431	FCAR	19	1	1.006
FCRL2	Q96LA5	Fc receptor-like protein 2 (FcR-like protein 2) (FcRL2) (Fc receptor homolog 2) (FcRH2) (IFGP family protein 4) (Immunoglobulin receptor translocation-associated protein 4) (SH2 domain-containing phosphatase anchor protein 1) (CD antigen CD307b)	ENSG00000132704	FCRL2	1	1	0.985
FCRL3	Q96P31	Fc receptor-like protein 3 (FcR-like protein 3) (FcRL3) (Fc receptor homolog 3) (FcRH3) (IFGP family protein 3) (hIFGP3) (Immune receptor translocation-associated protein 3) (MAIA) (SH2 domain-containing phosphatase anchor protein 2) (CD antigen CD307c)	ENSG00000160856	FCRL3	1	0.583333	0.982
FCRL6	Q6DN72	Fc receptor-like protein 6 (FcR-like protein 6) (FcRL6) (Fc receptor homolog 6) (FcRH6) (IFGP6)	ENSG00000181036	FCRL6	1	1	0.984
FGF19	O95750	Fibroblast growth factor 19 (FGF-19)	ENSG00000162344	FGF19	11	1	1
FGF2	P09038	Fibroblast growth factor 2 (FGF-2) (Basic fibroblast growth factor) (bFGF) (Heparin-binding growth factor 2) (HBGF-2)	ENSG00000138685	FGF2	4	0	0.996
FGF5	P12034	Fibroblast growth factor 5 (FGF-5) (Heparin-binding growth factor 5) (HBGF-5) (Smag-82)	ENSG00000138675	FGF5	4	1	1.022
FIS1	Q9Y3D6	Mitochondrial fission 1 protein (FIS1 homolog) (hFis1) (Tetratricopeptide repeat protein 11) (TPR repeat protein 11)	ENSG00000214253	FIS1	7	1	1.013
FKBP1B	P68106	Peptidyl-prolyl cis-trans isomerase FKBP1B (PPIase FKBP1B) (EC 5.2.1.8) (12.6 kDa FK506-binding protein) (12.6 kDa FKBP) (FKBP-12.6) (FK506-binding protein 1B) (FKBP-1B) (Immunophilin FKBP12.6) (Rotamase) (h-FKBP-12)	ENSG00000119782	FKBP1B	2	0	0.997
FLT3LG	P49771	Fms-related tyrosine kinase 3 ligand (Flt3 ligand) (Flt3L) (SL cytokine)	ENSG00000090554	FLT3LG	19	1	0.989
FOXO1	Q12778	Forkhead box protein O1 (Forkhead box protein O1A) (Forkhead in rhabdomyosarcoma)	ENSG00000150907	FOXO1	13	0	0.976
FST	P19883	Follistatin (FS) (Activin-binding protein)	ENSG00000134363	FST	5	1	1.001
FSTL3	O95633	Follistatin-related protein 3 (Follistatin-like protein 3) (Follistatin-related gene protein)	ENSG00000070404	FSTL3	19	1	1.005
FXYD5	Q96DB9	FXYD domain-containing ion transport regulator 5 (Dysadherin)	ENSG00000089327	FXYD5	19	0	1.001
GAL	P22466	Galanin peptides [Cleaved into: Galanin; Galanin message-associated peptide (GMAP)]	ENSG00000069482	GAL	11	1	0.99
GALNT3	Q14435	Polypeptide N-acetylgalactosaminyltransferase 3 (EC 2.4.1.41) (Polypeptide GalNAc transferase 3) (GalNAc-T3) (pp-GaNTase 3) (Protein-UDP acetylgalactosaminyltransferase 3) (UDP-GalNAc:polypeptide N-acetylgalactosaminyltransferase 3)	ENSG00000115339	GALNT3	2	1	1.011
GBP2	P32456	Guanylate-binding protein 2 (EC 3.6.5.-) (GTP-binding protein 2) (GBP-2) (HuGBP-2) (Guanine nucleotide-binding protein 2) (Interferon-induced guanylate-binding protein 2)	ENSG00000162645	GBP2	1	0	0.998
GLOD4	Q9HC38	Glyoxalase domain-containing protein 4	ENSG00000167699	GLOD4	17	1	0.99
GMPR	P36959	GMP reductase 1 (GMPR 1) (EC 1.7.1.7) (Guanosine 5'-monophosphate oxidoreductase 1) (Guanosine monophosphate reductase 1)	ENSG00000137198	GMPR	6	1	0.988
GOPC	Q9HD26	Golgi-associated PDZ and coiled-coil motif-containing protein (CFTR-associated ligand) (Fused in glioblastoma) (PDZ protein interacting specifically with TC10) (PIST)	ENSG00000047932	GOPC	6	0.583333	1.01
GZMA	P12544	Granzyme A (EC 3.4.21.78) (CTL tryptase) (Cytotoxic T-lymphocyte proteinase 1) (Fragmentin-1) (Granzyme-1) (Hanukkah factor) (H factor) (HF)	ENSG00000145649	GZMA	5	1	1.01
GZMB	P10144	Granzyme B (EC 3.4.21.79) (C11) (CTLA-1) (Cathepsin G-like 1) (CTSGL1) (Cytotoxic T-lymphocyte proteinase 2) (Lymphocyte protease) (Fragmentin-2) (Granzyme-2) (Human lymphocyte protein) (HLP) (SECT) (T-cell serine protease 1-3E)	ENSG00000100453	GZMB	14	0	0.992
HCLS1	P14317	Hematopoietic lineage cell-specific protein (Hematopoietic cell-specific LYN substrate 1) (LckBP1) (p75)	ENSG00000180353	HCLS1	3	0.25	1.008
HEXIM1	O94992	Protein HEXIM1 (Cardiac lineage protein 1) (Estrogen down-regulated gene 1 protein) (Hexamethylene bis-acetamide-inducible protein 1) (Menage a quatre protein 1)	ENSG00000186834	HEXIM1	17	1	1.007
HGF	P14210	Hepatocyte growth factor (Hepatopoietin-A) (Scatter factor) (SF) [Cleaved into: Hepatocyte growth factor alpha chain; Hepatocyte growth factor beta chain]	ENSG00000019991	HGF	7	1	0.979
HLA-DRA	P01903	HLA class II histocompatibility antigen, DR alpha chain (MHC class II antigen DRA)	ENSG00000204287	HLA-DRA	6	0.5	0.99
HLA-E	P13747	HLA class I histocompatibility antigen, alpha chain E (MHC class I antigen E) [Cleaved into: Soluble HLA class I histocompatibility antigen, alpha chain E (sHLA-E)]	ENSG00000204592	HLA-E	6	0	1.01
HPCAL1	P37235	Hippocalcin-like protein 1 (Calcium-binding protein BDR-1) (HLP2) (Visinin-like protein 3) (VILIP-3)	ENSG00000115756	HPCAL1	2	1	0.997
HSD11B1	P28845	11-beta-hydroxysteroid dehydrogenase 1 (11-DH) (11-beta-HSD1) (EC 1.1.1.146) (7-oxosteroid reductase) (EC 1.1.1.201) (Corticosteroid 11-beta-dehydrogenase isozyme 1) (Short chain dehydrogenase/reductase family 26C member 1)	ENSG00000117594	HSD11B1	1	1	1.006
HSPA1A	P0DMV8	Heat shock 70 kDa protein 1A (Heat shock 70 kDa protein 1) (HSP70-1) (HSP70.1)	ENSG00000204389	HSPA1A	6	0	0.979
ICA1	Q05084	Islet cell autoantigen 1 (69 kDa islet cell autoantigen) (ICA69) (Islet cell autoantigen p69) (ICAp69) (p69)	ENSG00000003147	ICA1	7	0	1.002
ICAM4	Q14773	Intercellular adhesion molecule 4 (ICAM-4) (Landsteiner-Wiener blood group glycoprotein) (LW blood group protein) (CD antigen CD242)	ENSG00000105371	ICAM4	19	1	0.999
IDS	P22304	Iduronate 2-sulfatase (EC 3.1.6.13) (Alpha-L-iduronate sulfate sulfatase) (Idursulfase) [Cleaved into: Iduronate 2-sulfatase 42 kDa chain; Iduronate 2-sulfatase 14 kDa chain]	ENSG00000010404	IDS	X	1	1.004
IFNG	P01579	Interferon gamma (IFN-gamma) (Immune interferon)	ENSG00000111537	IFNG	12	0	0.992
IFNGR1	P15260	Interferon gamma receptor 1 (IFN-gamma receptor 1) (IFN-gamma-R1) (CDw119) (Interferon gamma receptor alpha-chain) (IFN-gamma-R-alpha) (CD antigen CD119)	ENSG00000027697	IFNGR1	6	1	0.996
IFNLR1	Q8IU57	Interferon lambda receptor 1 (IFN-lambda receptor 1) (IFN-lambda-R1) (Cytokine receptor class-II member 12) (Cytokine receptor family 2 member 12) (CRF2-12) (Interleukin-28 receptor subunit alpha) (IL-28 receptor subunit alpha) (IL-28R-alpha) (IL-28RA) (Likely interleukin or cytokine receptor 2) (LICR2)	ENSG00000185436	IFNLR1	1	1	0.983
IKBKG	Q9Y6K9	NF-kappa-B essential modulator (NEMO) (FIP-3) (IkB kinase-associated protein 1) (IKKAP1) (Inhibitor of nuclear factor kappa-B kinase subunit gamma) (I-kappa-B kinase subunit gamma) (IKK-gamma) (IKKG) (IkB kinase subunit gamma) (NF-kappa-B essential modifier)	ENST00000594239	IKBKG	X	0.0833333	1.002
IL10	P22301	Interleukin-10 (IL-10) (Cytokine synthesis inhibitory factor) (CSIF)	ENSG00000136634	IL10	1	0.5	0.991
IL10RA	Q13651	Interleukin-10 receptor subunit alpha (IL-10 receptor subunit alpha) (IL-10R subunit alpha) (IL-10RA) (CDw210a) (Interleukin-10 receptor subunit 1) (IL-10R subunit 1) (IL-10R1) (CD antigen CD210)	ENSG00000110324	IL10RA	11	0	1.009
IL10RB	Q08334	Interleukin-10 receptor subunit beta (IL-10 receptor subunit beta) (IL-10R subunit beta) (IL-10RB) (Cytokine receptor class-II member 4) (Cytokine receptor family 2 member 4) (CRF2-4) (Interleukin-10 receptor subunit 2) (IL-10R subunit 2) (IL-10R2) (CD antigen CDw210b)	ENSG00000243646	IL10RB	21	1	1.006
IL11	P20809	Interleukin-11 (IL-11) (Adipogenesis inhibitory factor) (AGIF) (Oprelvekin)	ENSG00000095752	IL11	19	0	0.992
IL12B	P29460	Interleukin-12 subunit beta (IL-12B) (Cytotoxic lymphocyte maturation factor 40 kDa subunit) (CLMF p40) (IL-12 subunit p40) (NK cell stimulatory factor chain 2) (NKSF2)	ENSG00000113302	IL12B	5	1	0.996
IL12RB1	P42701	Interleukin-12 receptor subunit beta-1 (IL-12 receptor subunit beta-1) (IL-12R subunit beta-1) (IL-12R-beta-1) (IL-12RB1) (IL-12 receptor beta component) (CD antigen CD212)	ENSG00000096996	IL12RB1	19	0	0.994
IL13	P35225	Interleukin-13 (IL-13)	ENSG00000169194	IL13	5	0	1.003
IL15	P40933	Interleukin-15 (IL-15)	ENSG00000164136	IL15	4	1	1.002
IL15RA	Q13261	Interleukin-15 receptor subunit alpha (IL-15 receptor subunit alpha) (IL-15R-alpha) (IL-15RA) (CD antigen CD215) [Cleaved into: Soluble interleukin-15 receptor subunit alpha (sIL-15 receptor subunit alpha) (sIL-15R-alpha) (sIL-15RA)]	ENSG00000134470	IL15RA	10	0	0.993
IL16	Q14005	Pro-interleukin-16 [Cleaved into: Interleukin-16 (IL-16) (Lymphocyte chemoattractant factor) (LCF)]	ENSG00000172349	IL16	15	1	1.001
IL17A	Q16552	Interleukin-17A (IL-17) (IL-17A) (Cytotoxic T-lymphocyte-associated antigen 8) (CTLA-8)	ENSG00000112115	IL17A	6	0.166667	0.997
IL17C	Q9P0M4	Interleukin-17C (IL-17C) (Cytokine CX2)	ENSG00000124391	IL17C	16	1	0.993
IL17D	Q8TAD2	Interleukin-17D (IL-17D) (Interleukin-27) (IL-27)	ENSG00000172458	IL17D	13	1	1.005
IL17F	Q96PD4	Interleukin-17F (IL-17F) (Cytokine ML-1)	ENSG00000112116	IL17F	6	0	0.996
IL17RB	Q9NRM6	Interleukin-17 receptor B (IL-17 receptor B) (IL-17RB) (Cytokine receptor-like 4) (IL-17 receptor homolog 1) (IL-17Rh1) (IL17Rh1) (Interleukin-17B receptor) (IL-17B receptor)	ENSG00000056736	IL17RB	3	1	0.998
IL18	Q14116	Interleukin-18 (IL-18) (Iboctadekin) (Interferon gamma-inducing factor) (IFN-gamma-inducing factor) (Interleukin-1 gamma) (IL-1 gamma)	ENSG00000150782	IL18	11	1	1.013
IL18R1	Q13478	Interleukin-18 receptor 1 (IL-18R-1) (IL-18R1) (EC 3.2.2.6) (CD218 antigen-like family member A) (CDw218a) (IL1 receptor-related protein) (IL-1Rrp) (IL1R-rp) (Interleukin-18 receptor alpha) (IL-18R-alpha) (IL-18Ralpha) (CD antigen CD218a)	ENSG00000115604	IL18R1	2	1	1.007
IL1A	P01583	Interleukin-1 alpha (IL-1 alpha) (Hematopoietin-1)	ENSG00000115008	IL1A	2	0	0.993
IL1B	P01584	Interleukin-1 beta (IL-1 beta) (Catabolin)	ENSG00000125538	IL1B	2	0	1.006
IL1R2	P27930	Interleukin-1 receptor type 2 (IL-1R-2) (IL-1RT-2) (IL-1RT2) (CD121 antigen-like family member B) (CDw121b) (IL-1 type II receptor) (Interleukin-1 receptor beta) (IL-1R-beta) (Interleukin-1 receptor type II) (CD antigen CD121b) [Cleaved into: Interleukin-1 receptor type 2, membrane form (mIL-1R2) (mIL-1RII); Interleukin-1 receptor type 2, soluble form (sIL-1R2) (sIL-1RII)]	ENSG00000115590	IL1R2	2	1	0.989
IL1RL2	Q9HB29	Interleukin-1 receptor-like 2 (EC 3.2.2.6) (IL-36 receptor) (IL-36R) (Interleukin-1 receptor-related protein 2) (IL-1Rrp2) (IL1R-rp2)	ENSG00000115598	IL1RL2	2	1	0.999
IL1RN	P18510	Interleukin-1 receptor antagonist protein (IL-1RN) (IL-1ra) (IRAP) (ICIL-1RA) (IL1 inhibitor) (Anakinra)	ENSG00000136689	IL1RN	2	1	1.011
IL2	P60568	Interleukin-2 (IL-2) (T-cell growth factor) (TCGF) (Aldesleukin)	ENSG00000109471	IL2	4	0	1.01
IL20	Q9NYY1	Interleukin-20 (IL-20) (Cytokine Zcyto10)	ENSG00000162891	IL20	1	0	0.996
IL20RA	Q9UHF4	Interleukin-20 receptor subunit alpha (IL-20 receptor subunit alpha) (IL-20R-alpha) (IL-20RA) (Cytokine receptor class-II member 8) (Cytokine receptor family 2 member 8) (CRF2-8) (IL-20R1) (ZcytoR7)	ENSG00000016402	IL20RA	6	0	0.998
IL22RA1	Q8N6P7	Interleukin-22 receptor subunit alpha-1 (IL-22 receptor subunit alpha-1) (IL-22R-alpha-1) (IL-22RA1) (Cytokine receptor class-II member 9) (Cytokine receptor family 2 member 9) (CRF2-9) (ZcytoR11)	ENSG00000142677	IL22RA1	1	0	0.983
IL24	Q13007	Interleukin-24 (IL-24) (Melanoma differentiation-associated gene 7 protein) (MDA-7) (Suppression of tumorigenicity 16 protein)	ENSG00000162892	IL24	1	0	0.989
IL2RB	P14784	Interleukin-2 receptor subunit beta (IL-2 receptor subunit beta) (IL-2R subunit beta) (IL-2RB) (High affinity IL-2 receptor subunit beta) (Interleukin-15 receptor subunit beta) (p70-75) (p75) (CD antigen CD122)	ENSG00000100385	IL2RB	22	0	0.988
IL32	P24001	Interleukin-32 (IL-32) (Natural killer cells protein 4) (Tumor necrosis factor alpha-inducing factor)	ENSG00000008517	IL32	16	1	0.988
IL33	O95760	Interleukin-33 (IL-33) (Interleukin-1 family member 11) (IL-1F11) (Nuclear factor from high endothelial venules) (NF-HEV) [Cleaved into: Interleukin-33 (95-270); Interleukin-33 (99-270); Interleukin-33 (109-270)]	ENSG00000137033	IL33	9	0	0.986
IL3RA	P26951	Interleukin-3 receptor subunit alpha (IL-3 receptor subunit alpha) (IL-3R subunit alpha) (IL-3R-alpha) (IL-3RA) (CD antigen CD123)	ENSG00000185291	IL3RA	X	0	0.987
IL4	P05112	Interleukin-4 (IL-4) (B-cell stimulatory factor 1) (BSF-1) (Binetrakin) (Lymphocyte stimulatory factor 1) (Pitrakinra)	ENSG00000113520	IL4	5	0.333333	0.99
IL4R	P24394	Interleukin-4 receptor subunit alpha (IL-4 receptor subunit alpha) (IL-4R subunit alpha) (IL-4R-alpha) (IL-4RA) (CD antigen CD124) [Cleaved into: Soluble interleukin-4 receptor subunit alpha (Soluble IL-4 receptor subunit alpha) (Soluble IL-4R-alpha) (sIL4Ralpha/prot) (IL-4-binding protein) (IL4-BP)]	ENSG00000077238	IL4R	16	1	0.987
IL5	P05113	Interleukin-5 (IL-5) (B-cell differentiation factor I) (Eosinophil differentiation factor) (T-cell replacing factor) (TRF)	ENSG00000113525	IL5	5	0	0.995
IL5RA	Q01344	Interleukin-5 receptor subunit alpha (IL-5 receptor subunit alpha) (IL-5R subunit alpha) (IL-5R-alpha) (IL-5RA) (CDw125) (CD antigen CD125)	ENSG00000091181	IL5RA	3	1	1.019
IL6	P05231	Interleukin-6 (IL-6) (B-cell stimulatory factor 2) (BSF-2) (CTL differentiation factor) (CDF) (Hybridoma growth factor) (Interferon beta-2) (IFN-beta-2)	ENSG00000136244	IL6	7	0.666667	1.013
IL7	P13232	Interleukin-7 (IL-7)	ENSG00000104432	IL7	8	0.416667	1.006
IRAK1	P51617	Interleukin-1 receptor-associated kinase 1 (IRAK-1) (EC 2.7.11.1)	ENSG00000184216	IRAK1	X	0.166667	0.994
IRAK4	Q9NWZ3	Interleukin-1 receptor-associated kinase 4 (IRAK-4) (EC 2.7.11.1) (Renal carcinoma antigen NY-REN-64)	ENSG00000198001	IRAK4	12	0.916667	1.007
ISM1	B1AKI9	Isthmin-1	ENSG00000101230	ISM1	20	1	0.995
ITGA11	Q9UKX5	Integrin alpha-11	ENSG00000137809	ITGA11	15	1	0.988
ITGA6	P23229	Integrin alpha-6 (CD49 antigen-like family member F) (VLA-6) (CD antigen CD49f) [Cleaved into: Integrin alpha-6 heavy chain; Integrin alpha-6 light chain; Processed integrin alpha-6 (Alpha6p)]	ENSG00000091409	ITGA6	2	0	0.986
ITGB6	P18564	Integrin beta-6	ENSG00000115221	ITGB6	2	1	0.998
ITM2A	O43736	Integral membrane protein 2A (Protein E25)	ENSG00000078596	ITM2A	X	1	1.005
JCHAIN	P01591	Immunoglobulin J chain (Joining chain of multimeric IgA and IgM)	ENSG00000132465	IGJ	4	0.5	0.988
JUN	P05412	Transcription factor Jun (Activator protein 1) (AP1) (Proto-oncogene c-Jun) (Transcription factor AP-1 subunit Jun) (V-jun avian sarcoma virus 17 oncogene homolog) (p39)	ENSG00000177606	JUN	1	0	1.015
KLRB1	Q12918	Killer cell lectin-like receptor subfamily B member 1 (C-type lectin domain family 5 member B) (HNKR-P1a) (NKR-P1A) (Natural killer cell surface protein P1A) (CD antigen CD161)	ENSG00000111796	KLRB1	12	1	0.992
KLRD1	Q13241	Natural killer cells antigen CD94 (KP43) (Killer cell lectin-like receptor subfamily D member 1) (NK cell receptor) (CD antigen CD94)	ENSG00000134539	KLRD1	12	1	0.984
KRT19	P08727	Keratin, type I cytoskeletal 19 (Cytokeratin-19) (CK-19) (Keratin-19) (K19)	ENSG00000171345	KRT19	17	0.416667	0.986
KYNU	Q16719	Kynureninase (EC 3.7.1.3) (L-kynurenine hydrolase)	ENSG00000115919	KYNU	2	1	0.99
LAIR1	Q6GTX8	Leukocyte-associated immunoglobulin-like receptor 1 (LAIR-1) (hLAIR1) (CD antigen CD305)	ENSG00000167613	LAIR1	19	1	0.987
LAMA4	Q16363	Laminin subunit alpha-4 (Laminin-14 subunit alpha) (Laminin-8 subunit alpha) (Laminin-9 subunit alpha)	ENSG00000112769	LAMA4	6	1	1.009
LAMP3	Q9UQV4	Lysosome-associated membrane glycoprotein 3 (LAMP-3) (Lysosomal-associated membrane protein 3) (DC-lysosome-associated membrane glycoprotein) (DC LAMP) (Protein TSC403) (CD antigen CD208)	ENSG00000078081	LAMP3	3	1	1.012
LAP3	P28838	Cytosol aminopeptidase (EC 3.4.11.1) (Cysteinylglycine-S-conjugate dipeptidase) (EC 3.4.13.23) (Leucine aminopeptidase 3) (LAP-3) (Leucyl aminopeptidase) (Peptidase S) (Proline aminopeptidase) (EC 3.4.11.5) (Prolyl aminopeptidase)	ENSG00000002549	LAP3	4	0	1.006
LAT	O43561	Linker for activation of T-cells family member 1 (36 kDa phosphotyrosine adapter protein) (pp36) (p36-38)	ENSG00000213658	LAT	16	1	0.993
LGALS4	P56470	Galectin-4 (Gal-4) (Antigen NY-CO-27) (L-36 lactose-binding protein) (L36LBP) (Lactose-binding lectin 4)	ENSG00000171747	LGALS4	19	1	0.993
LGALS9	O00182	Galectin-9 (Gal-9) (Ecalectin) (Tumor antigen HOM-HD-21)	ENSG00000168961	LGALS9	17	1	0.988
LGMN	Q99538	Legumain (EC 3.4.22.34) (Asparaginyl endopeptidase) (Protease, cysteine 1)	ENSG00000100600	LGMN	14	1	0.994
LHPP	Q9H008	Phospholysine phosphohistidine inorganic pyrophosphate phosphatase (hLHPP) (EC 3.1.3.-) (EC 3.6.1.1)	ENSG00000107902	LHPP	10	1	1.015
LIFR	P42702	Leukemia inhibitory factor receptor (LIF receptor) (LIF-R) (CD antigen CD118)	ENSG00000113594	LIFR	5	1	1.009
LILRB4	Q8NHJ6	Leukocyte immunoglobulin-like receptor subfamily B member 4 (B4) (CD85 antigen-like family member K) (Immunoglobulin-like transcript 3) (ILT-3) (Leukocyte immunoglobulin-like receptor 5) (LIR-5) (Monocyte inhibitory receptor HM18) (CD antigen CD85k)	ENSG00000186818	LILRB4	19	1	1.016
LRRN1	Q6UXK5	Leucine-rich repeat neuronal protein 1 (Neuronal leucine-rich repeat protein 1) (NLRR-1)	ENSG00000175928	LRRN1	3	1	0.987
LSP1	P33241	Lymphocyte-specific protein 1 (47 kDa actin-binding protein) (52 kDa phosphoprotein) (pp52) (Lymphocyte-specific antigen WP34)	ENSG00000130592	LSP1	11	1	1.001
LTA	P01374	Lymphotoxin-alpha (LT-alpha) (TNF-beta) (Tumor necrosis factor ligand superfamily member 1)	ENSG00000226979	LTA	6	0	0.998
LTBR	P36941	Tumor necrosis factor receptor superfamily member 3 (Lymphotoxin-beta receptor) (Tumor necrosis factor C receptor) (Tumor necrosis factor receptor 2-related protein) (Tumor necrosis factor receptor type III) (TNF-RIII) (TNFR-III)	ENSG00000111321	LTBR	12	1	0.995
LTO1	Q8WV07	Protein LTO1 homolog (Oral cancer-overexpressed protein 1) (Tumor-amplified and overexpressed sequence 1)	ENSG00000149716	ORAOV1	11	0	0.99
LY6D	Q14210	Lymphocyte antigen 6D (Ly-6D) (E48 antigen)	ENSG00000167656	LY6D	8	1	0.993
LY75	O60449	Lymphocyte antigen 75 (Ly-75) (C-type lectin domain family 13 member B) (DEC-205) (gp200-MR6) (CD antigen CD205)	ENSG00000054219	LY75	2	1	1.001
LY9	Q9HBG7	T-lymphocyte surface antigen Ly-9 (Cell surface molecule Ly-9) (Lymphocyte antigen 9) (SLAM family member 3) (SLAMF3) (Signaling lymphocytic activation molecule 3) (CD antigen CD229)	ENSG00000122224	LY9	1	1	1.001
MANF	P55145	Mesencephalic astrocyte-derived neurotrophic factor (Arginine-rich protein) (Protein ARMET)	ENSG00000145050	MANF	3	0.916667	0.992
MAP2K6	P52564	Dual specificity mitogen-activated protein kinase kinase 6 (MAP kinase kinase 6) (MAPKK 6) (EC 2.7.12.2) (MAPK/ERK kinase 6) (MEK 6) (Stress-activated protein kinase kinase 3) (SAPK kinase 3) (SAPKK-3) (SAPKK3)	ENSG00000108984	MAP2K6	17	0	0.999
MAPK9	P45984	Mitogen-activated protein kinase 9 (MAP kinase 9) (MAPK 9) (EC 2.7.11.24) (JNK-55) (Stress-activated protein kinase 1a) (SAPK1a) (Stress-activated protein kinase JNK2) (c-Jun N-terminal kinase 2)	ENSG00000050748	MAPK9	5	0	0.993
MATN2	O00339	Matrilin-2	ENSG00000132561	MATN2	8	1	0.994
MEGF10	Q96KG7	Multiple epidermal growth factor-like domains protein 10 (Multiple EGF-like domains protein 10)	ENSG00000145794	MEGF10	5	1	0.985
MEPE	Q9NQ76	Matrix extracellular phosphoglycoprotein (Osteoblast/osteocyte factor 45) (OF45) (Osteoregulin)	ENSG00000152595	MEPE	4	1	1.004
MERTK	Q12866	Tyrosine-protein kinase Mer (EC 2.7.10.1) (Proto-oncogene c-Mer) (Receptor tyrosine kinase MerTK)	ENSG00000153208	MERTK	2	1	1.011
METAP1D	Q6UB28	Methionine aminopeptidase 1D, mitochondrial (MAP 1D) (MetAP 1D) (EC 3.4.11.18) (Methionyl aminopeptidase type 1D, mitochondrial) (Peptidase M 1D)	ENSG00000172878	METAP1D	2	0.916667	1.006
MGMT	P16455	Methylated-DNA--protein-cysteine methyltransferase (EC 2.1.1.63) (6-O-methylguanine-DNA methyltransferase) (MGMT) (O-6-methylguanine-DNA-alkyltransferase)	ENSG00000170430	MGMT	10	1	0.989
MICB_MICA	Q29980_Q29983	MHC class I polypeptide-related sequence B, MHC class I polypeptide-related sequence A	ENSG00000204516	MICB_MICA	6	1	1.012
MILR1	Q7Z6M3	Allergin-1 (Allergy inhibitory receptor 1) (Mast cell antigen 32) (MCA-32) (Mast cell immunoglobulin-like receptor 1)	ENSG00000271605	MILR1	17	1	0.987
MLN	P12872	Promotilin [Cleaved into: Motilin; Motilin-associated peptide (MAP)]	ENSG00000096395	MLN	6	1	0.988
MMP1	P03956	Interstitial collagenase (EC 3.4.24.7) (Fibroblast collagenase) (Matrix metalloproteinase-1) (MMP-1) [Cleaved into: 22 kDa interstitial collagenase; 27 kDa interstitial collagenase]	ENSG00000196611	MMP1	11	1	0.995
MMP10	P09238	Stromelysin-2 (SL-2) (EC 3.4.24.22) (Matrix metalloproteinase-10) (MMP-10) (Transin-2)	ENSG00000166670	MMP10	11	1	1.008
MPIG6B	O95866	Megakaryocyte and platelet inhibitory receptor G6b (Protein G6b)	ENSG00000204420	C6orf25	6	1	0.984
MVK	Q03426	Mevalonate kinase (MK) (EC 2.7.1.36)	ENSG00000110921	MVK	12	0.5	1.014
MYO9B	Q13459	Unconventional myosin-IXb (Unconventional myosin-9b)	ENSG00000099331	MYO9B	19	0	0.999
MZB1	Q8WU39	Marginal zone B- and B1-cell-specific protein (Mesenteric estrogen-dependent adipose 7) (MEDA-7) (Plasma cell-induced resident endoplasmic reticulum protein) (Plasma cell-induced resident ER protein) (pERp1) (Proapoptotic caspase adapter protein)	ENSG00000170476	MZB1	5	1	0.998
NBN	O60934	Nibrin (Cell cycle regulatory protein p95) (Nijmegen breakage syndrome protein 1)	ENSG00000104320	NBN	8	0.166667	0.986
NCF2	P19878	Neutrophil cytosol factor 2 (NCF-2) (67 kDa neutrophil oxidase factor) (NADPH oxidase activator 2) (Neutrophil NADPH oxidase factor 2) (p67-phox)	ENSG00000116701	NCF2	1	1	0.996
NCK2	O43639	Cytoplasmic protein NCK2 (Growth factor receptor-bound protein 4) (NCK adaptor protein 2) (Nck-2) (SH2/SH3 adaptor protein NCK-beta)	ENSG00000071051	NCK2	2	0	0.993
NCLN	Q969V3	BOS complex subunit NCLN (Nicalin) (Nicastrin-like protein)	ENSG00000125912	NCLN	19	0	0.994
NCR1	O76036	Natural cytotoxicity triggering receptor 1 (Lymphocyte antigen 94 homolog) (NK cell-activating receptor) (Natural killer cell p46-related protein) (NK-p46) (NKp46) (hNKp46) (CD antigen CD335)	ENSG00000189430	NCR1	19	1	0.994
NELL2	Q99435	Protein kinase C-binding protein NELL2 (NEL-like protein 2) (Nel-related protein 2)	ENSG00000184613	NELL2	12	1	0.993
NFASC	O94856	Neurofascin	ENSG00000163531	NFASC	1	0	0.987
NFATC1	O95644	Nuclear factor of activated T-cells, cytoplasmic 1 (NF-ATc1) (NFATc1) (NFAT transcription complex cytosolic component) (NF-ATc) (NFATc)	ENSG00000131196	NFATC1	18	0	1.014
NFATC3	Q12968	Nuclear factor of activated T-cells, cytoplasmic 3 (NF-ATc3) (NFATc3) (NFATx) (T-cell transcription factor NFAT4) (NF-AT4) (NF-AT4c)	ENSG00000072736	NFATC3	16	0	0.994
NME3	Q13232	Nucleoside diphosphate kinase 3 (NDK 3) (NDP kinase 3) (EC 2.7.4.6) (DR-nm23) (Nucleoside diphosphate kinase C) (NDPKC) (nm23-H3)	ENSG00000103024	NME3	16	1	0.995
NPPC	P23582	C-type natriuretic peptide [Cleaved into: CNP-22; CNP-29; CNP-53]	ENSG00000163273	NPPC	2	1	0.989
NRTN	Q99748	Neurturin	ENSG00000171119	NRTN	19	0	1.001
NT5C3A	Q9H0P0	Cytosolic 5'-nucleotidase 3A (EC 3.1.3.5) (7-methylguanosine phosphate-specific 5'-nucleotidase) (7-methylguanosine nucleotidase) (EC 3.1.3.91) (Cytosolic 5'-nucleotidase 3) (Cytosolic 5'-nucleotidase III) (cN-III) (Pyrimidine 5'-nucleotidase 1) (P5'N-1) (P5N-1) (PN-I) (Uridine 5'-monophosphate hydrolase 1) (p36)	ENSG00000122643	NT5C3A	7	1	0.987
NTF3	P20783	Neurotrophin-3 (NT-3) (HDNF) (Nerve growth factor 2) (NGF-2) (Neurotrophic factor)	ENSG00000185652	NTF3	12	1	0.985
NUB1	Q9Y5A7	NEDD8 ultimate buster 1 (Negative regulator of ubiquitin-like proteins 1) (Renal carcinoma antigen NY-REN-18)	ENSG00000013374	NUB1	7	0.25	0.999
NUDC	Q9Y266	Nuclear migration protein nudC (Nuclear distribution protein C homolog)	ENSG00000090273	NUDC	1	1	0.992
OMD	Q99983	Osteomodulin (Keratan sulfate proteoglycan osteomodulin) (KSPG osteomodulin) (Osteoadherin) (OSAD)	ENSG00000127083	OMD	9	1	1.006
OSCAR	Q8IYS5	Osteoclast-associated immunoglobulin-like receptor (Osteoclast-associated receptor) (hOSCAR) (Polymeric immunoglobulin receptor 3) (PIgR-3) (PIgR3) (Poly-Ig receptor 3)	ENSG00000170909	OSCAR	19	1	0.993
OSM	P13725	Oncostatin-M (OSM)	ENSG00000099985	OSM	22	1	1.004
PADI2	Q9Y2J8	Protein-arginine deiminase type-2 (EC 3.5.3.15) (PAD-H19) (Peptidylarginine deiminase II) (Protein-arginine deiminase type II)	ENSG00000117115	PADI2	1	0	1.008
PAPPA	Q13219	Pappalysin-1 (EC 3.4.24.79) (Insulin-like growth factor-dependent IGF-binding protein 4 protease) (IGF-dependent IGFBP-4 protease) (IGFBP-4ase) (Pregnancy-associated plasma protein A) (PAPP-A)	ENSG00000182752	PAPPA	9	0.916667	1.013
PARP1	P09874	Poly [ADP-ribose] polymerase 1 (PARP-1) (EC 2.4.2.30) (ADP-ribosyltransferase diphtheria toxin-like 1) (ARTD1) (DNA ADP-ribosyltransferase PARP1) (EC 2.4.2.-) (NAD(+) ADP-ribosyltransferase 1) (ADPRT 1) (Poly[ADP-ribose] synthase 1) (Protein poly-ADP-ribosyltransferase PARP1) (EC 2.4.2.-) [Cleaved into: Poly [ADP-ribose] polymerase 1, processed C-terminus (Poly [ADP-ribose] polymerase 1, 89-kDa f…	ENSG00000143799	PARP1	1	0	1.007
PCDH1	Q08174	Protocadherin-1 (Cadherin-like protein 1) (Protocadherin-42) (PC42)	ENSG00000156453	PCDH1	5	1	0.995
PDGFB	P01127	Platelet-derived growth factor subunit B (PDGF subunit B) (PDGF-2) (Platelet-derived growth factor B chain) (Platelet-derived growth factor beta polypeptide) (Proto-oncogene c-Sis) (Becaplermin)	ENSG00000100311	PDGFB	22	1	1.006
PDLIM7	Q9NR12	PDZ and LIM domain protein 7 (LIM mineralization protein) (LMP) (Protein enigma)	ENSG00000196923	PDLIM7	5	0	0.999
PGF	P49763	Placenta growth factor (PlGF)	ENSG00000119630	PGF	14	1	0.997
PIK3AP1	Q6ZUJ8	Phosphoinositide 3-kinase adapter protein 1 (B-cell adapter for phosphoinositide 3-kinase) (B-cell phosphoinositide 3-kinase adapter protein 1)	ENSG00000155629	PIK3AP1	10	1	1.006
PKLR	P30613	Pyruvate kinase PKLR (EC 2.7.1.40) (Pyruvate kinase 1) (Pyruvate kinase isozymes L/R) (R-type/L-type pyruvate kinase) (Red cell/liver pyruvate kinase)	ENSG00000143627	PKLR	1	1	1.003
PLA2G4A	P47712	Cytosolic phospholipase A2 (cPLA2) (Phospholipase A2 group IVA) [Includes: Phospholipase A2 (EC 3.1.1.4) (Phosphatidylcholine 2-acylhydrolase); Lysophospholipase (EC 3.1.1.5)]	ENSG00000116711	PLA2G4A	1	1	1.006
PLAUR	Q03405	Urokinase plasminogen activator surface receptor (U-PAR) (uPAR) (Monocyte activation antigen Mo3) (CD antigen CD87)	ENSG00000011422	PLAUR	19	1	1.004
PLXNA4	Q9HCM2	Plexin-A4	ENSG00000221866	PLXNA4	7	1	1.001
PNLIPRP2	P54317	Pancreatic lipase-related protein 2 (PL-RP2) (Cytotoxic T lymphocyte lipase) (Galactolipase) (EC 3.1.1.26) (Triacylglycerol lipase) (EC 3.1.1.3)	ENSG00000165862	PNLIPRP2	10	1	1.003
PNPT1	Q8TCS8	Polyribonucleotide nucleotidyltransferase 1, mitochondrial (EC 2.7.7.8) (3'-5' RNA exonuclease OLD35) (PNPase old-35) (Polynucleotide phosphorylase 1) (PNPase 1) (Polynucleotide phosphorylase-like protein)	ENSG00000138035	PNPT1	2	0	0.996
PON3	Q15166	Serum paraoxonase/lactonase 3 (EC 3.1.1.2) (EC 3.1.1.81) (EC 3.1.8.1)	ENSG00000105852	PON3	7	1	0.983
PPP1R9B	Q96SB3	Neurabin-2 (Neurabin-II) (Protein phosphatase 1 regulatory subunit 9B) (Spinophilin)	ENSG00000108819	PPP1R9B	17	1	1
PRDX3	P30048	Thioredoxin-dependent peroxide reductase, mitochondrial (EC 1.11.1.24) (Antioxidant protein 1) (AOP-1) (HBC189) (Peroxiredoxin III) (Prx-III) (Peroxiredoxin-3) (Protein MER5 homolog) (Thioredoxin-dependent peroxiredoxin 3)	ENSG00000165672	PRDX3	10	0	0.992
PRDX5	P30044	Peroxiredoxin-5, mitochondrial (EC 1.11.1.24) (Alu corepressor 1) (Antioxidant enzyme B166) (AOEB166) (Liver tissue 2D-page spot 71B) (PLP) (Peroxiredoxin V) (Prx-V) (Peroxisomal antioxidant enzyme) (TPx type VI) (Thioredoxin peroxidase PMP20) (Thioredoxin-dependent peroxiredoxin 5)	ENSG00000126432	PRDX5	11	1	0.99
PREB	Q9HCU5	Prolactin regulatory element-binding protein (Mammalian guanine nucleotide exchange factor mSec12)	ENSG00000138073	PREB	2	0	1
PRELP	P51888	Prolargin (Proline-arginine-rich end leucine-rich repeat protein)	ENSG00000188783	PRELP	1	1	1.003
PRKAB1	Q9Y478	5'-AMP-activated protein kinase subunit beta-1 (AMPK subunit beta-1) (AMPKb)	ENSG00000111725	PRKAB1	12	0	0.994
PRKCQ	Q04759	Protein kinase C theta type (EC 2.7.11.13) (nPKC-theta)	ENSG00000065675	PRKCQ	10	0	0.996
PROK1	P58294	Prokineticin-1 (Endocrine-gland-derived vascular endothelial growth factor) (EG-VEGF) (Mambakine)	ENSG00000143125	PROK1	1	1	0.993
PRSS8	Q16651	Prostasin (EC 3.4.21.-) (Channel-activating protease 1) (CAP1) (Serine protease 8) [Cleaved into: Prostasin light chain; Prostasin heavy chain]	ENSG00000052344	PRSS8	16	1	1.004
PSIP1	O75475	PC4 and SFRS1-interacting protein (CLL-associated antigen KW-7) (Dense fine speckles 70 kDa protein) (DFS 70) (Lens epithelium-derived growth factor) (Transcriptional coactivator p75/p52)	ENSG00000164985	PSIP1	9	1	1.013
PSMG3	Q9BT73	Proteasome assembly chaperone 3 (PAC-3) (hPAC3)	ENSG00000157778	PSMG3	7	1	1.018
PSPN	O60542	Persephin (PSP)	ENSG00000125650	PSPN	19	0.833333	0.996
PTH1R	Q03431	Parathyroid hormone/parathyroid hormone-related peptide receptor (PTH/PTHrP type I receptor) (PTH/PTHr receptor) (Parathyroid hormone 1 receptor) (PTH1 receptor)	ENSG00000160801	PTH1R	3	1	0.991
PTPN6	P29350	Tyrosine-protein phosphatase non-receptor type 6 (EC 3.1.3.48) (Hematopoietic cell protein-tyrosine phosphatase) (Protein-tyrosine phosphatase 1C) (PTP-1C) (Protein-tyrosine phosphatase SHP-1) (SH-PTP1)	ENSG00000111679	PTPN6	12	1	1.019
PTPRM	P28827	Receptor-type tyrosine-protein phosphatase mu (Protein-tyrosine phosphatase mu) (R-PTP-mu) (EC 3.1.3.48)	ENSG00000173482	PTPRM	18	1	1.022
PTX3	P26022	Pentraxin-related protein PTX3 (Pentaxin-related protein PTX3) (Tumor necrosis factor alpha-induced protein 5) (TNF alpha-induced protein 5) (Tumor necrosis factor-inducible gene 14 protein) (TSG-14)	ENSG00000163661	PTX3	3	1	0.98
RAB37	Q96AX2	Ras-related protein Rab-37	ENSG00000172794	RAB37	17	0	0.993
RAB6A	P20340	Ras-related protein Rab-6A (Rab-6)	ENSG00000175582	RAB6A	11	0	1.003
RABGAP1L	Q5R372	Rab GTPase-activating protein 1-like	ENSG00000152061	RABGAP1L	1	0	0.996
REG4	Q9BYZ8	Regenerating islet-derived protein 4 (REG-4) (Gastrointestinal secretory protein) (REG-like protein) (Regenerating islet-derived protein IV) (Reg IV)	ENSG00000134193	REG4	1	1	1.008
RGS8	P57771	Regulator of G-protein signaling 8 (RGS8)	ENSG00000135824	RGS8	1	0	1
ROBO1	Q9Y6N7	Roundabout homolog 1 (Deleted in U twenty twenty) (H-Robo-1)	ENSG00000169855	ROBO1	3	1	1.003
SAMD9L	Q8IVG5	Sterile alpha motif domain-containing protein 9-like (SAM domain-containing protein 9-like)	ENSG00000177409	SAMD9L	7	0	0.996
SCG3	Q8WXD2	Secretogranin-3 (Secretogranin III) (SgIII)	ENSG00000104112	SCG3	15	1	1.004
SCGB1A1	P11684	Uteroglobin (Club cell phospholipid-binding protein) (CCPBP) (Club cells 10 kDa secretory protein) (CC10) (Secretoglobin family 1A member 1) (Urinary protein 1) (UP-1) (UP1) (Urine protein 1)	ENSG00000149021	SCGB1A1	11	1	0.992
SCGB3A2	Q96PL1	Secretoglobin family 3A member 2 (Pneumo secretory protein 1) (PnSP-1) (Uteroglobin-related protein 1)	ENSG00000164265	SCGB3A2	5	1	1.002
SCGN	O76038	Secretagogin	ENSG00000079689	SCGN	6	0	1.007
SCRN1	Q12765	Secernin-1	ENSG00000136193	SCRN1	7	0	0.984
SELPLG	Q14242	P-selectin glycoprotein ligand 1 (PSGL-1) (Selectin P ligand) (CD antigen CD162)	ENSG00000110876	SELPLG	12	1	1
SERPINB8	P50452	Serpin B8 (Cytoplasmic antiproteinase 2) (CAP-2) (CAP2) (Peptidase inhibitor 8) (PI-8)	ENSG00000166401	SERPINB8	18	1	1
SH2D1A	O60880	SH2 domain-containing protein 1A (Duncan disease SH2-protein) (Signaling lymphocytic activation molecule-associated protein) (SLAM-associated protein) (T-cell signal transduction molecule SAP)	ENSG00000183918	SH2D1A	X	0	0.99
SHMT1	P34896	Serine hydroxymethyltransferase, cytosolic (SHMT) (EC 2.1.2.1) (Glycine hydroxymethyltransferase) (Serine methylase)	ENSG00000176974	SHMT1	17	1	0.988
SIGLEC1	Q9BZZ2	Sialoadhesin (Sialic acid-binding Ig-like lectin 1) (Siglec-1) (CD antigen CD169)	ENSG00000088827	SIGLEC1	20	1	0.995
SIGLEC10	Q96LC7	Sialic acid-binding Ig-like lectin 10 (Siglec-10) (Siglec-like protein 2)	ENSG00000142512	SIGLEC10	19	1	0.999
SIRPB1	O00241	Signal-regulatory protein beta-1 (SIRP-beta-1) (CD172 antigen-like family member B) (CD antigen CD172b)	ENSG00000101307	SIRPB1	20	1	0.998
SIT1	Q9Y3P8	Signaling threshold-regulating transmembrane adapter 1 (SHP2-interacting transmembrane adapter protein) (Suppression-inducing transmembrane adapter 1) (gp30/40)	ENSG00000137078	SIT1	9	0	1.012
SKAP2	O75563	Src kinase-associated phosphoprotein 2 (Pyk2/RAFTK-associated protein) (Retinoic acid-induced protein 70) (SKAP55 homolog) (SKAP-55HOM) (SKAP-HOM) (Src family-associated phosphoprotein 2) (Src kinase-associated phosphoprotein 55-related protein) (Src-associated adapter protein with PH and SH3 domains)	ENSG00000005020	SKAP2	7	0.833333	1.015
SLAMF1	Q13291	Signaling lymphocytic activation molecule (CDw150) (IPO-3) (SLAM family member 1) (CD antigen CD150)	ENSG00000117090	SLAMF1	1	0	0.987
SLAMF7	Q9NQ25	SLAM family member 7 (CD2 subset 1) (CD2-like receptor-activating cytotoxic cells) (CRACC) (Membrane protein FOAP-12) (Novel Ly9) (Protein 19A) (CD antigen CD319)	ENSG00000026751	SLAMF7	1	1	0.988
SLC39A5	Q6ZMH5	Zinc transporter ZIP5 (Solute carrier family 39 member 5) (Zrt- and Irt-like protein 5) (ZIP-5)	ENSG00000139540	SLC39A5	12	0.916667	1.01
SMOC2	Q9H3U7	SPARC-related modular calcium-binding protein 2 (Secreted modular calcium-binding protein 2) (SMOC-2) (Smooth muscle-associated protein 2) (SMAP-2)	ENSG00000112562	SMOC2	6	1	0.998
SMPDL3A	Q92484	Acid sphingomyelinase-like phosphodiesterase 3a (ASM-like phosphodiesterase 3a) (EC 3.1.4.-)	ENSG00000172594	SMPDL3A	6	1	0.984
SPINK4	O60575	Serine protease inhibitor Kazal-type 4 (Peptide PEC-60 homolog)	ENSG00000122711	SPINK4	9	0	1.001
SPINT2	O43291	Kunitz-type protease inhibitor 2 (Hepatocyte growth factor activator inhibitor type 2) (HAI-2) (Placental bikunin)	ENSG00000167642	SPINT2	19	1	0.971
SPON1	Q9HCB6	Spondin-1 (F-spondin) (Vascular smooth muscle cell growth-promoting factor)	ENSG00000152268	SPON1	11	1	1.005
SPRY2	O43597	Protein sprouty homolog 2 (Spry-2)	ENSG00000136158	SPRY2	13	0.75	0.999
SRPK2	P78362	SRSF protein kinase 2 (EC 2.7.11.1) (SFRS protein kinase 2) (Serine/arginine-rich protein-specific kinase 2) (SR-protein-specific kinase 2) [Cleaved into: SRSF protein kinase 2 N-terminal; SRSF protein kinase 2 C-terminal]	ENSG00000135250	SRPK2	7	0	1.002
STX8	Q9UNK0	Syntaxin-8	ENSG00000170310	STX8	17	0	0.986
SULT2A1	Q06520	Sulfotransferase 2A1 (ST2A1) (EC 2.8.2.2) (Bile salt sulfotransferase) (EC 2.8.2.14) (Dehydroepiandrosterone sulfotransferase) (DHEA-ST) (DHEA-ST8) (Hydroxysteroid Sulfotransferase) (HST) (ST2) (SULT2A3)	ENSG00000105398	SULT2A1	19	0	0.997
TANK	Q92844	TRAF family member-associated NF-kappa-B activator (TRAF-interacting protein) (I-TRAF)	ENSG00000136560	TANK	2	0	1.003
TBC1D5	Q92609	TBC1 domain family member 5	ENSG00000131374	TBC1D5	3	0	0.99
TFF2	Q03403	Trefoil factor 2 (Spasmolysin) (Spasmolytic polypeptide) (SP)	ENSG00000160181	TFF2	21	1	0.989
TGFA	P01135	Protransforming growth factor alpha [Cleaved into: Transforming growth factor alpha (TGF-alpha) (EGF-like TGF) (ETGF) (TGF type 1)]	ENSG00000163235	TGFA	2	0.916667	1.003
TGFB1	P01137	Transforming growth factor beta-1 proprotein [Cleaved into: Latency-associated peptide (LAP); Transforming growth factor beta-1 (TGF-beta-1)]	ENSG00000105329	TGFB1	19	1	0.99
TIMP3	P35625	Metalloproteinase inhibitor 3 (Protein MIG-5) (Tissue inhibitor of metalloproteinases 3) (TIMP-3)	ENSG00000100234	TIMP3	22	1	1.001
TLR3	O15455	Toll-like receptor 3 (CD antigen CD283)	ENSG00000164342	TLR3	4	1	0.993
TNF	P01375	Tumor necrosis factor (Cachectin) (TNF-alpha) (Tumor necrosis factor ligand superfamily member 2) (TNF-a) [Cleaved into: Tumor necrosis factor, membrane form (N-terminal fragment) (NTF); Intracellular domain 1 (ICD1); Intracellular domain 2 (ICD2); C-domain 1; C-domain 2; Tumor necrosis factor, soluble form]	ENSG00000232810	TNF	6	0	0.996
TNFAIP8	O95379	Tumor necrosis factor alpha-induced protein 8 (TNF alpha-induced protein 8) (Head and neck tumor and metastasis-related protein) (MDC-3.13) (NF-kappa-B-inducible DED-containing protein) (NDED) (SCC-S2) (TNF-induced protein GG2-1)	ENSG00000145779	TNFAIP8	5	0	0.996
TNFRSF11A	Q9Y6Q6	Tumor necrosis factor receptor superfamily member 11A (Osteoclast differentiation factor receptor) (ODFR) (Receptor activator of NF-KB) (CD antigen CD265)	ENSG00000141655	TNFRSF11A	18	1	1.004
TNFRSF11B	O00300	Tumor necrosis factor receptor superfamily member 11B (Osteoclastogenesis inhibitory factor) (Osteoprotegerin)	ENSG00000164761	TNFRSF11B	8	1	1.01
TNFRSF13B	O14836	Tumor necrosis factor receptor superfamily member 13B (Transmembrane activator and CAML interactor) (CD antigen CD267)	ENSG00000240505	TNFRSF13B	17	1	0.997
TNFRSF13C	Q96RJ3	Tumor necrosis factor receptor superfamily member 13C (B-cell-activating factor receptor) (BAFF receptor) (BAFF-R) (BLyS receptor 3) (CD antigen CD268)	ENSG00000159958	TNFRSF13C	22	0.333333	0.988
TNFRSF14	Q92956	Tumor necrosis factor receptor superfamily member 14 (Herpes virus entry mediator A) (Herpesvirus entry mediator A) (HveA) (Tumor necrosis factor receptor-like 2) (TR2) (CD antigen CD270)	ENSG00000157873	TNFRSF14	1	1	0.995
TNFRSF4	P43489	Tumor necrosis factor receptor superfamily member 4 (ACT35 antigen) (OX40L receptor) (TAX transcriptionally-activated glycoprotein 1 receptor) (CD antigen CD134)	ENSG00000186827	TNFRSF4	1	1	0.99
TNFSF10	P50591	Tumor necrosis factor ligand superfamily member 10 (Apo-2 ligand) (Apo-2L) (TNF-related apoptosis-inducing ligand) (Protein TRAIL) (CD antigen CD253)	ENSG00000121858	TNFSF10	3	1	0.986
TNFSF11	O14788	Tumor necrosis factor ligand superfamily member 11 (Osteoclast differentiation factor) (ODF) (Osteoprotegerin ligand) (OPGL) (Receptor activator of nuclear factor kappa-B ligand) (RANKL) (TNF-related activation-induced cytokine) (TRANCE) (CD antigen CD254) [Cleaved into: Tumor necrosis factor ligand superfamily member 11, membrane form; Tumor necrosis factor ligand superfamily member 11, soluble …	ENSG00000120659	TNFSF11	13	0.916667	1.007
TNFSF12	O43508	Tumor necrosis factor ligand superfamily member 12 (APO3 ligand) (TNF-related weak inducer of apoptosis) (TWEAK) [Cleaved into: Tumor necrosis factor ligand superfamily member 12, membrane form; Tumor necrosis factor ligand superfamily member 12, secreted form]	ENSG00000239697	TNFSF12	17	1	1.02
TNFSF13	O75888	Tumor necrosis factor ligand superfamily member 13 (A proliferation-inducing ligand) (APRIL) (TNF- and APOL-related leukocyte expressed ligand 2) (TALL-2) (TNF-related death ligand 1) (TRDL-1) (CD antigen CD256)	ENSG00000161955	TNFSF13	17	1	0.995
TPP1	O14773	Tripeptidyl-peptidase 1 (TPP-1) (EC 3.4.14.9) (Cell growth-inhibiting gene 1 protein) (Lysosomal pepstatin-insensitive protease) (LPIC) (Tripeptidyl aminopeptidase) (Tripeptidyl-peptidase I) (TPP-I)	ENSG00000166340	TPP1	11	1	1.006
TPSAB1	Q15661	Tryptase alpha/beta-1 (Tryptase-1) (EC 3.4.21.59) (Tryptase I) (Tryptase alpha-1)	ENSG00000172236	TPSAB1	16	1	0.995
TPT1	P13693	Translationally-controlled tumor protein (TCTP) (Fortilin) (Histamine-releasing factor) (HRF) (p23)	ENSG00000133112	TPT1	13	0	0.994
TRAF2	Q12933	TNF receptor-associated factor 2 (EC 2.3.2.27) (E3 ubiquitin-protein ligase TRAF2) (RING-type E3 ubiquitin transferase TRAF2) (Tumor necrosis factor type 2 receptor-associated protein 3)	ENSG00000127191	TRAF2	9	1	0.996
TREM2	Q9NZC2	Triggering receptor expressed on myeloid cells 2 (TREM-2) (Triggering receptor expressed on monocytes 2)	ENSG00000095970	TREM2	6	1	0.996
TRIM21	P19474	E3 ubiquitin-protein ligase TRIM21 (EC 2.3.2.27) (52 kDa Ro protein) (52 kDa ribonucleoprotein autoantigen Ro/SS-A) (RING finger protein 81) (RING-type E3 ubiquitin transferase TRIM21) (Ro(SS-A)) (Sjoegren syndrome type A antigen) (SS-A) (Tripartite motif-containing protein 21)	ENSG00000132109	TRIM21	11	1	1
TRIM5	Q9C035	Tripartite motif-containing protein 5 (EC 2.3.2.27) (RING finger protein 88) (RING-type E3 ubiquitin transferase TRIM5)	ENSG00000132256	TRIM5	11	0	1
VASH1	Q7L8A9	Tubulinyl-Tyr carboxypeptidase 1 (EC 3.4.17.17) (Tubulin carboxypeptidase 1) (Tyrosine carboxypeptidase 1) (TTCP 1) (Vasohibin-1)	ENSG00000071246	VASH1	14	0	0.998
VEGFA	P15692	Vascular endothelial growth factor A, long form (L-VEGF) (Vascular permeability factor) (VPF) [Cleaved into: N-VEGF; VEGFA]	ENSG00000112715	VEGFA	6	1	1.005
VEGFD	O43915	Vascular endothelial growth factor D (VEGF-D) (c-Fos-induced growth factor) (FIGF)	ENSG00000165197	FIGF	X	1	1
WAS	P42768	Actin nucleation-promoting factor WAS (Wiskott-Aldrich syndrome protein) (WASp)	ENSG00000015285	WAS	X	0	0.986
WFIKKN2	Q8TEU8	WAP, Kazal, immunoglobulin, Kunitz and NTR domain-containing protein 2 (Growth and differentiation factor-associated serum protein 1) (GASP-1) (hGASP-1) (WAP, follistatin, immunoglobulin, Kunitz and NTR domain-containing-related protein) (WFIKKN-related protein)	ENSG00000173714	WFIKKN2	17	1	0.997
WNT9A	O14904	Protein Wnt-9a (Protein Wnt-14)	ENSG00000143816	WNT9A	1	0	1.005
YTHDF3	Q7Z739	YTH domain-containing family protein 3 (DF3)	ENSG00000185728	YTHDF3	8	0	0.998

## Sheet: Table S3
Table S3: Summary statistics of sentinel pQTLs
Protein	Gene Symbol	UniProt	SNP	ID	Chr	bp	REF	ALT	A1	A1_FREQ	N	BETA	SE	P	Cis/Trans	Direction	Signal Type	Predicted Function	Impact	Nearest Gene	Nearest Gene Ensembl ID	Reported/Novel	Validation (East Asian population)							Validation (European population)
																							Study	Effect allele	Alternative allele	beta (effect allele)	P-value	proxy SNP	LD r2	Study	Replication A0	Replication A1	beta (effect allele)	P-value
O75077	ADAM23	O75077	rs3770974	rs3770974	2	207403050	A	G	G	0.0288826	1056	1.15008	0.124071	1.02395e-19	cis	+	main	intron_variant	MODIFIER	ADAM23	ENSG00000114948	Novel	-	-	-	-	-	-	-	-	-	-	-	-
Q15109	AGER	Q15109	rs41268928	rs41268928	6	32147157	G	C	C	0.212595	1056	-0.405541	0.0500748	1.52492e-15	cis	-	main	upstream_gene_variant	MODIFIER	AGPAT1	ENSG00000204310	Reported	CKB	T	C	-0.30107	2.9e-27	rs2070600	0.965	UKBB	G	C	-0.279302	71.61
O00468	AGRN	O00468	rs7526076	rs7526076	1	998395	G	A	A	0.104167	1056	-0.483667	0.0646305	1.52236e-13	cis	+	main	intron_variant&non_coding_transcript_variant	MODIFIER	RP11-465B22.3	ENSG00000217801	Reported	-	-	-	-	-	-	-	UKBB	A	G	0.20706	135.98
O00253	AGRP	O00253	rs35079605	GSA-rs35079605	16	67517538	C	T	T	0.0161443	1053	2.26251	0.149444	5.49031e-47	cis	-	main	upstream_gene_variant	MODIFIER	ATP6V0D1	ENSG00000159720	Reported	CKB	T	C	2.1744	4.3e-158	-	-	Gilly_2020	C	T	2.45446	3.15646e-18
P30838	ALDH3A1	P30838	rs4646791	rs4646791:19642268:T:TG	17	19642268	T	TG	TG	0.417379	1053	0.410993	0.0387609	5.01794e-25	cis	-	additional	intron_variant	MODIFIER	ALDH3A1	ENSG00000108602	Reported	-	-	-	-	-	-	-	UKBB	T	TG	0.446877	785.787
P30838	ALDH3A1	P30838	rs4646783	rs4646783:19652366:G:T	17	19652366	G	T	T	0.0856327	1051	-0.904941	0.0674765	5.74089e-38	cis	-	main	upstream_gene_variant	MODIFIER	ALDH3A1	ENSG00000108602	Reported	CKB	A	AG	-0.66104	1.2e-52	rs151298179	1	-	-	-	-	-
Q9BXJ7	AMN	Q9BXJ7	rs35919524	rs35919524:103391245:GA:G	14	103391245	GA	G	G	0.0745614	1026	0.553419	0.0818877	2.34028e-11	cis	+	main	intron_variant	MODIFIER	-	-	Reported	-	-	-	-	-	-	-	UKBB	GA	G	0.255037	212.438
Q9BY76	ANGPTL4	Q9BY76	rs1323787	rs1323787:116853246:T:A	9	116853246	T	A	A	0.0525803	1027	0.527532	0.0898744	5.89193e-09	trans	+	main	downstream_gene_variant	MODIFIER	KIF12	ENSG00000136883	Novel	-	-	-	-	-	-	-	-	-	-	-	-
P50995	ANXA11	P50995	rs200173819	rs200173819:55100072:CAA:C	19	55100072	CAA	C	C	0.31262	1046	0.789793	0.0399997	5.47998e-74	trans	-	main	downstream_gene_variant	MODIFIER	LILRA2	ENSG00000239998	Novel	-	-	-	-	-	-	-	-	-	-	-	-
P19801	AOC1	P19801	rs10952294	rs10952294:150556992:C:T	7	150556992	T	C	C	0.457975	1047	-0.35626	0.0426159	1.98606e-16	cis	+	main	intron_variant	MODIFIER	AOC1	ENSG00000002726	Reported	-	-	-	-	-	-	-	UKBB	C	T	0.187443	109.521
P15291	B4GALT1	P15291	rs10971417	rs10971417:33121480:C:T	9	33121480	T	C	C	0.490449	1047	-0.314642	0.0416571	9.24797e-14	cis	-	main	intron_variant	MODIFIER	B4GALT1	ENSG00000086062	Reported	-	-	-	-	-	-	-	UKBB	C	T	0.149543	70.1733
P15291	B4GALT1	P15291	rs17695224	rs17695224	19	52324216	G	A	A	0.206913	1056	-0.413512	0.050703	9.80766e-16	trans	-	main	intron_variant	MODIFIER	FPR3	ENSG00000187474	Reported	CKB	T	C	-0.41129	4e-49	rs17761883	0.964	UKBB	G	A	-0.319712	319.544
P35613	BSG	P35613	rs7025162	rs7025162	9	136166346	C	T	T	0.357481	1056	-0.232809	0.0405452	1.22324e-08	trans	+	main	intergenic_variant	MODIFIER	-	-	Novel	-	-	-	-	-	-	-	-	-	-	-	-
Q7KYR7	BTN2A1	Q7KYR7	rs3734539	kgp17268530	6	26459996	C	T	T	0.0421402	1056	-1.10345	0.100624	1.42653e-26	cis	+	main	missense_variant	MODERATE	BTN2A1	ENSG00000112763	Reported	CKB	T	C	-1.0963	1.1e-91	-	-	-	-	-	-	-
P78410	BTN3A2	P78410	rs9366653	rs9366653:26354247:G:A	6	26354247	G	A	A	0.0683112	1054	-1.11666	0.0762668	2.55314e-44	cis	+	main	upstream_gene_variant	MODIFIER	RNU6-1259P	ENSG00000252399	Reported	CKB	A	G	-0.90795	4.2e-107	rs12174639	0.978	UKBB	G	A	-0.954205	1642.17
P02745	C1QA	P02745	rs649114	rs649114:22961783:C:T	1	22961783	T	C	C	0.403195	1033	0.399332	0.0417639	8.20053e-21	cis	+	main	upstream_gene_variant	MODIFIER	C1QA	ENSG00000173372	Reported	CKB	G	A	-0.28538	1.7e-33	rs172378	0.992	UKBB	C	T	-0.339792	432.018
Q99616	CCL13	Q99616	rs3136676	rs3136676	17	32683289	A	G	G	0.158144	1056	-0.681884	0.0542116	6.62468e-34	cis	+	main	downstream_gene_variant	MODIFIER	CCL1	ENSG00000108702	Reported	-	-	-	-	-	-	-	UKBB	A	G	-0.439501	177.677
O00626	CCL22	O00626	rs1188186	rs1188186:56441221:T:C	14	56441221	C	T	T	0.405131	1033	-0.261899	0.0430997	1.72531e-09	trans	+	main	downstream_gene_variant	MODIFIER	-	ENSG00000259868	Novel	-	-	-	-	-	-	-	-	-	-	-	-
O00626	CCL22	O00626	rs68168072	rs68168072:57395170:CAAAA:C	16	57395170	C	CAAAA	CAAAA	0.143482	1028	-0.48892	0.0592318	4.65957e-16	cis	+	main	intron_variant	MODIFIER	CCL22	ENSG00000102962	Reported	-	-	-	-	-	-	-	UKBB	CAAAA	C	0.266164	52.158
P55773	CCL23	P55773	rs854691	rs854691:34323852:T:G	17	34323852	T	G	G	0.0629771	1048	-0.669375	0.0849489	8.19251e-15	cis	-	additional	3_prime_UTR_variant	MODIFIER	CCL15	ENSG00000275718	Reported	-	-	-	-	-	-	-	UKBB	T	G	-0.524015	224.059
P55773	CCL23	P55773	rs150969588	rs150969588:34324198:CTTATTA:C	17	34324198	CTTATTA	C	C	0.0959164	1053	0.887939	0.0655698	1.25357e-38	cis	-	main	downstream_gene_variant	MODIFIER	CCL15	ENSG00000267596	Novel	-	-	-	-	-	-	-	-	-	-	-	-
O00175	CCL24	O00175	rs3779425	rs3779425:75444563:G:A	7	75444563	G	A	A	0.347805	1025	-0.433952	0.0422637	1.31521e-23	cis	-	main	upstream_gene_variant	MODIFIER	CCL24	ENSG00000106178	Reported	-	-	-	-	-	-	-	UKBB	G	A	-0.354389	116.328
O15444	CCL25	O15444	rs752406	rs752406:8040935:T:C	19	8040935	C	T	T	0.473583	1041	0.440828	0.0389343	4.17261e-28	cis	+	additional	intron_variant	MODIFIER	ELAVL1	ENSG00000066044	Reported	-	-	-	-	-	-	-	UKBB	T	C	-0.351242	513.083
O15444	CCL25	O15444	rs2032887	rs2032887	19	8121360	A	G	G	0.115057	1056	0.963362	0.054688	4.45141e-61	cis	+	main	missense_variant	MODERATE	CCL25	ENSG00000131142	Reported	CKB	A	AG	0.86569	1.6e-133	rs113506845	0.965	UKBB	A	G	0.770243	1756.31
O15444	CCL25	O15444	rs1047781	rs1047781	19	49206631	A	T	T	0.464489	1056	-0.404987	0.0395282	1.50911e-23	trans	+	main	missense_variant	MODERATE	FUT2	ENSG00000176920	Reported	CKB	T	A	-0.33935	1.1e-52	-	-	-	-	-	-	-
P10147	CCL3	P10147	rs957979	rs957979	17	34436708	A	C	C	0.365057	1056	0.336658	0.0425257	6.15597e-15	cis	-	main	downstream_gene_variant	MODIFIER	CCL4	ENSG00000129277	Reported	-	-	-	-	-	-	-	UKBB	A	C	0.396007	477.872
P13236	CCL4	P13236	rs17617750	kgp1409837	17	34445545	C	T	T	0.0629735	1056	0.495364	0.0893263	3.70376e-08	cis	+	main	intron_variant,non_coding_transcript_variant	MODIFIER	-	ENSG00000276241	Novel	-	-	-	-	-	-	-	-	-	-	-	-
P80098	CCL7	P80098	rs12075	rs12075	1	159175354	G	A	A	0.0539773	1056	-0.670582	0.0899762	1.89983e-13	trans	+	main	missense_variant	MODERATE	DARC	ENSG00000213088	Reported	CKB	A	G	-0.55096	2.7e-32	rs863006	1	UKBB	G	A	-0.272035	293.103
O95971	CD160	O95971	rs9726452	rs9726452:145736308:G:A	1	145736308	G	A	A	0.358749	1023	0.302877	0.0446089	1.90463e-11	cis	-	main	intron_variant	MODIFIER	PDZK1	ENSG00000174827	Reported	-	-	-	-	-	-	-	UKBB	G	A	0.212824	170.007
P41217	CD200	P41217	rs4575866	rs4575866:112062307:C:T	3	112062307	C	T	T	0.24067	1045	0.369575	0.0485375	5.92656e-14	cis	+	main	intron_variant	MODIFIER	CD200	ENSG00000091972	Reported	CKB	T	C	0.34655	6e-40	rs2399417	1	UKBB	C	T	0.227582	60.3935
P41217	CD200	P41217	rs8176751	rs8176751:136131022:C:T	9	136131022	C	T	T	0.231025	1054	0.324489	0.0477537	1.80941e-11	trans	+	main	non_coding_transcript_exon_variant	MODIFIER	ABO	ENSG00000175164	Reported	CKB	C	T	0.2754	2.9e-24	rs75179845	0.931	UKBB	C	T	0.22815	67.3141
Q8TD46	CD200R1	Q8TD46	rs16860272	rs16860272:112667779:A:C	3	112667779	A	C	C	0.187916	1051	1.40402	0.0350841	2.30348e-213	cis	-	main	intron_variant	MODIFIER	CD200R1	ENSG00000163606	Reported	CKB	G	A	1.2788	1.99999996731943e-317	rs74815257	0.978	UKBB	A	C	1.87157	1567.98
P20273	CD22	P20273	rs10411883	rs10411883:35800720:G:C	19	35800720	C	G	G	0.202582	1007	0.37273	0.053092	4.06588e-12	cis	+	main	intron_variant	MODIFIER	MAG	ENSG00000105695	Reported	CKB	C	G	-0.34234	2.4e-32	-	-	UKBB	G	C	-0.218712	170.39
Q9BZW8	CD244	Q9BZW8	rs55653503	kgp15265076	1	160815762	G	A	A	0.0800189	1056	1.07793	0.071286	6.71386e-47	cis	-	main	intron_variant	MODIFIER	CD244	ENSG00000122223	Reported	CKB	T	C	1.0063	7.5e-118	rs80120885	1	UKBB	G	A	0.876553	11.909
Q5ZPR3	CD276	Q5ZPR3	rs10083681	rs10083681:73996101:G:A	15	73996101	G	A	A	0.108333	1020	-1.32097	0.05779	1.1395e-93	cis	+	main	intron_variant	MODIFIER	CD276	ENSG00000103855	Reported	CKB	A	G	-1.2905	7.3e-303	rs11574483	1	UKBB	G	A	-1.33627	2510.48
P01730	CD4	P01730	rs28919570	rs28919570	12	6925407	C	T	T	0.0355114	1056	-0.648727	0.107205	1.99407e-09	cis	+	main	missense_variant	MODERATE	CD4	ENSG00000010610	Reported	CKB	T	C	-0.75939	1.7e-33	-	-	UKBB	C	T	-0.680826	10.116
P25942	CD40	P25942	rs1883832	rs1883832	20	44746982	C	T	T	0.357481	1056	-0.615917	0.0399333	1.50462e-48	cis	+	main	5_prime_UTR_variant	MODIFIER	CD40	ENSG00000101017	Reported	CKB	G	T	0.75539	5.5e-223	rs4810485	0.96	UKBB	T	C	0.423226	514.383
P19256	CD58	P19256	rs2519093	ilmnseq_rs2519093	9	136141870	C	T	T	0.205492	1056	-0.417691	0.0511945	9.55726e-16	trans	-	main	intron_variant&non_coding_transcript_variant	MODIFIER	ABO	ENSG00000175164	Reported	-	-	-	-	-	-	-	UKBB	C	T	-0.453604	480.234
P30203	CD6	P30203	rs2074224	rs2074224:60774656:A:G	11	60774656	A	G	G	0.331532	1018	0.508768	0.0430319	2.59739e-30	cis	+	additional	intron_variant	MODIFIER	CD6	ENSG00000013725	Reported	CKB	C	T	-0.37653	3.2e-51	rs7396422	0.882	UKBB	A	G	0.433184	561.645
P30203	CD6	P30203	rs11230563	rs11230563:60776209:C:T	11	60776209	C	T	T	0.152344	1024	-0.889759	0.0548088	6.70608e-53	cis	+	main	missense_variant	MODERATE	CD6	ENSG00000013725	Reported	CKB	C	T	-0.76765	3.6e-142	rs2074227	1	UKBB	C	T	-0.809763	2401.3
P32970	CD70	P32970	rs11062067	rs11062067:2121396:A:G	12	2121396	A	G	G	0.0740385	1040	0.423901	0.0762279	3.41162e-08	trans	-	main	intron_variant	MODIFIER	CACNA1C	ENSG00000151067	Novel	-	-	-	-	-	-	-	-	-	-	-	-
P32970	CD70	P32970	rs17516272	kgp1550596	19	6604087	G	T	T	0.179451	1056	0.691628	0.0462391	5.13191e-46	cis	-	main	5_prime_UTR_variant	MODIFIER	CD70	ENSG00000125726	Reported	-	-	-	-	-	-	-	UKBB	G	T	0.148801	31.6025
P32970	CD70	P32970	rs73922419	rs73922419:6609480:A:T	19	6609480	A	T	T	0.0476893	1017	0.786641	0.0902198	1.12769e-17	cis	-	additional	intergenic_variant	MODIFIER	-	-	Reported	-	-	-	-	-	-	-	UKBB	A	T	0.207086	57.5675
P40259	CD79B	P40259	rs75179845	rs75179845:136132954:T:C	9	136132954	T	C	C	0.228137	1052	0.348762	0.0482483	9.3868e-13	trans	-	main	intron_variant&non_coding_transcript_variant	MODIFIER	ABO	ENSG00000175164	Reported	CKB	T	C	0.26844	1.2e-22	rs8176672	0.962	UKBB	T	C	0.323155	95.8444
Q15517	CDSN	Q15517	rs707913	kgp2157912	6	31084787	A	G	G	0.284091	1056	-0.518805	0.044094	4.08002e-30	cis	-	main	upstream_gene_variant	MODIFIER	C6orf15	ENSG00000204542	Reported	-	-	-	-	-	-	-	UKBB	A	G	-0.545844	781.785
Q15517	CDSN	Q15517	rs3130561	seq-rs3130561	6	31100768	C	T	T	0.118371	1056	-0.384247	0.0664872	9.87318e-09	cis	-	additional	downstream_gene_variant	MODIFIER	PSORS1C2	ENSG00000204538	Reported	-	-	-	-	-	-	-	UKBB	T	C	0.43377	622.678
Q3KPI0	CEACAM21	Q3KPI0	rs2191019	rs2191019:42080923:T:C	19	42080923	C	T	T	0.419293	1047	0.534512	0.0392183	4.72553e-39	cis	+	additional	upstream_gene_variant	MODIFIER	CEACAM21	ENSG00000007129	Reported	CKB	C	A	0.58144	4.1e-145	rs714106	0.925	UKBB	T	C	-1.206	4031.89
Q3KPI0	CEACAM21	Q3KPI0	rs723902	rs723902:42084182:G:C	19	42084182	C	G	G	0.057346	1055	1.62381	0.0731077	5.99484e-90	cis	+	main	intron_variant	MODIFIER	CEACAM21	ENSG00000007129	Reported	CKB	G	C	1.6821	4e-261	-	-	UKBB	G	C	-1.26315	4094.04
Q07065	CKAP4	Q07065	rs73195671	rs73195671:106627592:C:T	12	106627592	T	C	C	0.419508	1056	-0.498704	0.0415806	3.68939e-31	cis	-	main	downstream_gene_variant	MODIFIER	CKAP4	ENSG00000136026	Reported	CKB	C	T	0.46331	2.4e-83	rs1238021	0.818	UKBB	C	T	0.266356	132.853
P12532	CKMT1A	P12532	rs13379573	rs13379573:43950663:C:A	15	43950663	C	A	A	0.361554	1004	-0.298548	0.045126	6.00359e-11	cis	+	main	intron_variant	MODIFIER	-	-	Reported	CKB	A	G	-0.30276	1.4e-36	rs141202682	0.856	-	-	-	-	-
Q8WTT0	CLEC4C	Q8WTT0	rs60969753	rs60969753:50295305:CT:C	7	50295305	CT	C	C	0.254986	1053	-0.343543	0.0459111	1.53427e-13	trans	-	main	intergenic_variant	MODIFIER	-	-	Reported	CKB	A	G	-0.27676	2.5e-30	rs62447171	1	UKBB	CT	C	-0.198204	212.714
Q8WTT0	CLEC4C	Q8WTT0	rs7960410	rs7960410:7906461:C:T	12	7906461	C	T	T	0.293799	1016	0.663391	0.0419925	1.99261e-50	cis	-	main	upstream_gene_variant	MODIFIER	CLEC4C	ENSG00000198178	Reported	CKB	T	C	0.63707	7.8e-146	rs10845821	0.882	UKBB	C	T	0.850293	2724.2
Q8WXI8	CLEC4D	Q8WXI8	rs11046145	rs11046145:8697055:G:A	12	8697055	G	A	A	0.113181	1047	-0.955709	0.0613627	2.42868e-49	cis	+	main	upstream_gene_variant	MODIFIER	CLEC4E	ENSG00000166523	Reported	CKB	C	CATCT	-0.74806	9.6e-90	rs10607232	1	UKBB	G	A	-0.57922	764.271
Q6UXB4	CLEC4G	Q6UXB4	rs687621	rs687621	9	136137065	A	G	G	0.436553	1056	0.358114	0.0397152	8.91203e-19	trans	-	main	intron_variant&non_coding_transcript_variant	MODIFIER	ABO	ENSG00000175164	Reported	CKB	G	A	-0.32387	2.7e-45	rs687289	0.971	-	-	-	-	-
Q9BXN2	CLEC7A	Q9BXN2	rs61441743	rs61441743:10265953:A:C	12	10265953	A	C	C	0.0894584	1034	0.696699	0.0707153	6.01392e-22	cis	-	additional	downstream_gene_variant	MODIFIER	CLEC7A	ENSG00000172243	Reported	CKB	A	C	0.62443	1.4e-63	rs11053607	0.807	-	-	-	-	-
Q9BXN2	CLEC7A	Q9BXN2	rs12813148	rs12813148:10273414:T:C	12	10273414	T	C	C	0.336019	1055	0.457511	0.0421423	4.22865e-26	cis	-	main	intron_variant	MODIFIER	CLEC7A	ENSG00000172243	Reported	-	-	-	-	-	-	-	UKBB	T	C	0.0884819	16.5109
Q9BXN2	CLEC7A	Q9BXN2	rs11053623	rs11053623	12	10282736	T	C	C	0.278883	1056	-0.336419	0.0459075	4.63381e-13	cis	-	additional	5_prime_UTR_variant	MODIFIER	CLEC7A	ENSG00000172243	Reported	CKB	T	A	-0.25915	7.2e-22	rs11053628	0.991	UKBB	T	C	-1.11846	351.829
Q9H4D0	CLSTN2	Q9H4D0	rs982074	rs982074:139619410:C:T	3	139619410	C	T	T	0.373637	1009	-0.414403	0.0446124	9.33206e-20	cis	+	main	intergenic_variant	MODIFIER	-	-	Reported	CKB	G	GTGGGGAAAC	-0.33015	2.4e-41	rs151281776	0.909	UKBB	C	T	-0.374846	375.944
Q9UHC6	CNTNAP2	Q9UHC6	rs850491	rs850491:145315057:A:G	7	145315057	G	A	A	0.429808	1040	0.505655	0.0358371	1.73363e-41	cis	+	main	intergenic_variant	MODIFIER	-	-	Reported	CKB	C	G	-0.58145	8.1e-138	rs6464691	0.98	UKBB	A	G	-0.540378	946.799
P20849	COL9A1	P20849	rs16868977	rs16868977:71006098:T:C	6	71006098	T	C	C	0.42795	1034	-0.237058	0.032252	4.02011e-13	cis	-	main	intron_variant	MODIFIER	COL9A1	ENSG00000112280	Reported	CKB	G	A	-0.26586	2e-30	rs9455033	0.992	UKBB	T	C	-0.224843	60.6556
Q6UXH1	CRELD2	Q6UXH1	rs9616368	rs9616368:50303533:C:G	22	50303533	C	G	G	0.0898289	1052	0.542378	0.070519	3.34303e-14	cis	+	main	intron_variant	MODIFIER	-	-	Reported	CKB	T	C	-0.58461	1.2e-44	rs1884557	0.951	UKBB	C	G	0.207097	106.638
P24387	CRHBP	P24387	rs1320306	rs1320306	5	76174519	G	A	A	0.450758	1056	0.485246	0.0356261	4.9335e-39	cis	+	main	intron_variant	MODIFIER	S100Z	ENSG00000171643	Reported	-	-	-	-	-	-	-	UKBB	A	G	-0.52623	987.562
P09919	CSF3	P09919	rs62065216	rs62065216:38218773:G:A	17	38218773	A	G	G	0.466602	1033	-0.233487	0.0419299	3.27657e-08	cis	+	main	upstream_gene_variant	MODIFIER	THRA	ENSG00000126351	Novel	-	-	-	-	-	-	-	-	-	-	-	-
O76096	CST7	O76096	rs6138403	rs6138403:24882221:T:C	20	24882221	C	T	T	0.0593057	1037	-0.957578	0.0867603	7.44536e-27	cis	+	main	intergenic_variant	MODIFIER	-	-	Reported	CKB	T	C	-0.75082	1.1e-58	rs6114988	0.868	UKBB	T	C	0.651091	822.316
Q99895	CTRC	Q99895	rs9496720	rs9496720:96311308:C:T	6	96311308	C	T	T	0.063447	1056	-0.531317	0.0863285	1.06794e-09	trans	+	main	intergenic_variant	MODIFIER	-	-	Novel	-	-	-	-	-	-	-	-	-	-	-	-
Q99895	CTRC	Q99895	rs8176751	rs8176751:136131022:C:T	9	136131022	C	T	T	0.231025	1054	0.818821	0.0415582	8.37687e-74	trans	+	main	non_coding_transcript_exon_variant	MODIFIER	ABO	ENSG00000175164	Reported	CKB	C	G	0.80539	2.7e-197	rs7853989	0.931	UKBB	C	T	0.649914	546.562
P78310	CXADR	P78310	rs635634	rs635634	9	136155000	C	T	T	0.204072	1056	-0.357222	0.0504714	2.67025e-12	trans	+	main	upstream_gene_variant	MODIFIER	ABO	ENSG00000175164	Reported	-	-	-	-	-	-	-	UKBB	C	T	-0.341132	271.925
P78310	CXADR	P78310	rs1047781	rs1047781	19	49206631	A	T	T	0.464489	1056	-0.23744	0.0412852	1.16018e-08	trans	+	main	missense_variant	MODERATE	FUT2	ENSG00000176920	Novel	-	-	-	-	-	-	-	-	-	-	-	-
P09341	CXCL1	P09341	rs3117604	rs3117604	4	74734668	T	C	C	0.497633	1056	0.399831	0.0408374	1.00616e-21	cis	+	main	upstream_gene_variant	MODIFIER	CXCL1	ENSG00000163739	Reported	CKB	C	T	0.41972	1.3e-75	-	-	UKBB	T	C	0.617515	1186.13
P80162	CXCL6	P80162	rs112348802	rs112348802:74677886:C:CA	4	74677886	C	CA	CA	0.316554	1033	0.434511	0.0431456	8.1045e-23	cis	+	main	intergenic_variant	MODIFIER	-	-	Reported	-	-	-	-	-	-	-	UKBB	C	CA	0.461565	788.988
Q9GZT9	EGLN1	Q9GZT9	rs1765774	rs1765774:231628292:A:G	1	231628292	A	G	G	0.443738	1022	0.229834	0.0397982	1.02105e-08	cis	-	main	intergenic_variant	MODIFIER	-	-	Reported	-	-	-	-	-	-	-	UKBB	A	G	0.263762	57.2851
Q9UJA9	ENPP5	Q9UJA9	rs7768892	rs7768892	6	46045136	C	T	T	0.411932	1056	0.399294	0.0388478	1.10692e-23	cis	-	additional	intron_variant	MODIFIER	CLIC5	ENSG00000112782	Novel	-	-	-	-	-	-	-	-	-	-	-	-
Q9UJA9	ENPP5	Q9UJA9	rs16874326	exm552172	6	46133282	T	C	C	0.0345644	1056	-0.891408	0.107125	2.67281e-16	cis	-	additional	missense_variant	MODERATE	ENPP5	ENSG00000112796	Novel	-	-	-	-	-	-	-	-	-	-	-	-
Q9UJA9	ENPP5	Q9UJA9	rs10807337	rs10807337	6	46142552	A	C	C	0.472538	1056	-0.437793	0.0381381	7.99637e-29	cis	-	main	upstream_gene_variant	MODIFIER	ENPP5	ENSG00000112796	Reported	-	-	-	-	-	-	-	UKBB	A	C	-0.573527	1185.84
Q6UWV6	ENPP7	Q6UWV6	rs199787049	rs199787049:74476483:A:AG	10	74476483	A	AG	AG	0.0185728	1023	-0.876407	0.157311	3.23617e-08	trans	+	main	intron_variant	MODIFIER	MCU	ENSG00000156026	Novel	-	-	-	-	-	-	-	-	-	-	-	-
Q6UWV6	ENPP7	Q6UWV6	rs11653614	rs11653614:77703751:G:A	17	77703751	A	G	G	0.493583	1013	-0.97002	0.0302647	4.13605e-156	cis	+	main	upstream_gene_variant	MODIFIER	ENPP7	ENSG00000182156	Reported	CKB	T	C	-0.90218	1.99999996731943e-317	rs11871061	0.816	UKBB	G	A	0.942985	3044.29
P21709	EPHA1	P21709	rs154446	JHU_5.95194328	5	95194329	C	A	A	0.118371	1056	-0.313601	0.0567305	4.08426e-08	trans	-	main	intron_variant,non_coding_transcript_variant	MODIFIER	LINC01554	ENSG00000236882	Novel	-	-	-	-	-	-	-	-	-	-	-	-
P21709	EPHA1	P21709	rs79587607	rs79587607:143105828:C:T	7	143105828	C	T	T	0.295187	1018	-0.261693	0.042239	8.4266e-10	cis	-	main	missense_variant	MODERATE	EPHA1	ENSG00000146904	Reported	CKB	T	C	-0.22068	6.5e-19	-	-	-	-	-	-	-
P07148	FABP1	P07148	rs2241883	rs2241883	2	88424066	T	C	C	0.197443	1056	-0.338733	0.0499631	2.00238e-11	cis	-	main	missense_variant	MODERATE	FABP1	ENSG00000163586	Reported	CKB	T	C	-0.25613	6.2e-20	rs12994970	0.946	UKBB	T	C	-0.236988	194.204
Q0Z7S8	FABP9	Q0Z7S8	rs3820136	rs3820136:152884438:C:T	1	152884438	T	C	C	0.378496	1037	-0.240656	0.0426384	2.14296e-08	trans	-	main	downstream_gene_variant	MODIFIER	IVL	ENSG00000163207	Reported	-	-	-	-	-	-	-	UKBB	C	T	0.0978577	13.4883
Q0Z7S8	FABP9	Q0Z7S8	rs8069202	rs8069202:38122200:G:A	17	38122200	A	G	G	0.438815	1046	0.289756	0.0405729	1.72664e-12	trans	-	main	intron_variant	MODIFIER	GSDMA	ENSG00000167914	Reported	-	-	-	-	-	-	-	UKBB	G	A	-0.301285	379.586
P24071	FCAR	P24071	rs12608573	rs12608573:55391374:C:G	19	55391374	C	G	G	0.262279	1018	0.929089	0.0414523	1.00218e-90	cis	+	main	intron_variant	MODIFIER	FCAR	ENSG00000186431	Reported	CKB	G	C	0.88526	1.8e-259	-	-	UKBB	C	G	0.843811	1837.49
P24071	FCAR	P24071	rs1433097	seq-rs1433097	19	55418458	T	C	C	0.438447	1056	-0.530262	0.0416804	1.35098e-34	cis	+	additional	intron_variant	MODIFIER	NCR1	ENSG00000189430	Reported	-	-	-	-	-	-	-	UKBB	T	C	-0.38277	273.883
Q96LA5	FCRL2	Q96LA5	rs6677622	rs6677622	1	157751356	C	T	T	0.219223	1056	0.870589	0.0448764	6.28646e-72	cis	-	main	upstream_gene_variant	MODIFIER	FCRL2	ENSG00000132704	Reported	CKB	C	G	0.85809	3.1e-201	rs61691958	0.923	UKBB	C	T	0.76668	1314.08
Q96LA5	FCRL2	Q96LA5	rs55672385	rs55672385:16842313:A:C	17	16842313	A	C	C	0.354776	1026	0.261724	0.0449247	7.60423e-09	trans	-	main	downstream_gene_variant	MODIFIER	TNFRSF13B	ENSG00000240505	Novel	-	-	-	-	-	-	-	-	-	-	-	-
Q96P31	FCRL3	Q96P31	rs2210912	rs2210912:157668701:A:C	1	157668701	A	C	C	0.401042	1056	1.10565	0.0287913	1.64306e-202	cis	-	main	intron_variant	MODIFIER	FCRL3	ENSG00000160856	Reported	-	-	-	-	-	-	-	UKBB	A	C	0.964826	3425.41
Q6DN72	FCRL6	Q6DN72	rs6656979	rs6656979	1	159782181	C	A	A	0.243371	1056	-0.759699	0.0427851	6.50751e-62	cis	+	main	intron_variant	MODIFIER	FCRL6	ENSG00000181036	Reported	CKB	C	T	-0.76549	5.8e-174	rs12083967	0.89	UKBB	C	A	-0.890492	1932.34
P12034	FGF5	P12034	rs12509595	rs12509595:81182554:T:C	4	81182554	T	C	C	0.416587	1049	0.686093	0.0347216	4.12783e-74	cis	+	main	intergenic_variant	MODIFIER	-	-	Reported	CKB	T	A	0.6338	3e-172	rs16998073	0.987	UKBB	T	C	0.682078	1648.52
P19883	FST	P19883	rs10413500	rs10413500:35836826:C:G	19	35836826	C	G	G	0.0546059	1053	-0.497128	0.0895309	3.56417e-08	trans	+	main	intron_variant	MODIFIER	CD22	ENSG00000012124	Novel	-	-	-	-	-	-	-	-	-	-	-	-
Q14435	GALNT3	Q14435	rs10202966	rs10202966:166716305:C:T	2	166716305	C	T	T	0.137151	1039	-0.466368	0.0612689	6.05912e-14	cis	-	main	intron_variant&NMD_transcript_variant	MODIFIER	TTC21B	ENSG00000123607	Reported	-	-	-	-	-	-	-	UKBB	C	T	-0.373291	465.238
Q14435	GALNT3	Q14435	9:136139907:GAAACTGCC:G	9:136139907:GAAACTGCC:G	9	136139907	GAAACTGCC	G	G	0.205603	1053	0.311376	0.0530004	5.67035e-09	trans	-	main	intron_variant&non_coding_transcript_variant	MODIFIER	ABO	ENSG00000175164	Reported	-	-	-	-	-	-	-	UKBB	GAAACTGCC	G	0.309668	298.271
P36959	GMPR	P36959	rs142002554	rs142002554:16295347:A:AACTC	6	16295347	A	AACTC	AACTC	0.0111542	1031	-1.58117	0.187529	1.14043e-16	cis	+	main	downstream_gene_variant	MODIFIER	ATXN1	ENSG00000124788	Novel	-	-	-	-	-	-	-	-	-	-	-	-
P12544	GZMA	P12544	rs188369143	ilmnseq_5:54676305	5	54676305	T	C	C	0.0123106	1056	-1.199	0.186272	1.84913e-10	cis	+	main	intron_variant	MODIFIER	MTREX	ENSG00000039123	Novel	-	-	-	-	-	-	-	-	-	-	-	-
P10144	GZMB	P10144	rs62396278	rs62396278:31329119:T:C	6	31329119	T	C	C	0.0854701	1053	0.792383	0.0690091	7.82017e-29	trans	-	main	upstream_gene_variant	MODIFIER	HLA-B	ENSG00000234745	Reported	-	-	-	-	-	-	-	UKBB	T	C	0.376235	139.286
P10144	GZMB	P10144	rs2273844	14_24173254	14	25103414	G	A	A	0.28125	1056	-0.489104	0.0444104	8.91812e-27	cis	-	main	5_prime_UTR_variant	MODIFIER	-	-	Reported	CKB	T	C	-0.489	2e-85	rs6573910	0.966	UKBB	G	A	-0.354773	363.79
P01903	HLA-DRA	P01903	rs6941393	rs6941393:32583200:G:A	6	32583200	G	A	A	0.200758	1056	0.584667	0.0460241	1.66045e-34	cis	+	main	intergenic_variant	MODIFIER	-	-	Reported	-	-	-	-	-	-	-	UKBB	G	A	0.580879	842.989
Q14773	ICAM4	Q14773	rs635634	rs635634	9	136155000	C	T	T	0.204072	1056	-0.368608	0.0508714	8.28744e-13	trans	+	main	upstream_gene_variant	MODIFIER	ABO	ENSG00000175164	Reported	CKB	T	C	0.40797	1.9e-49	rs600038	0.974	UKBB	C	T	-0.323483	321.651
P15260	IFNGR1	P15260	rs9376269	rs9376269:137539505:C:G	6	137539505	C	G	G	0.488964	1042	-0.331866	0.0414963	3.3646e-15	cis	-	main	intron_variant	MODIFIER	IFNGR1	ENSG00000027697	Reported	-	-	-	-	-	-	-	UKBB	C	G	-0.202778	120.939
P15260	IFNGR1	P15260	rs75179845	rs75179845:136132954:T:C	9	136132954	T	C	C	0.228137	1052	0.373325	0.0480006	1.76002e-14	trans	-	main	intron_variant&non_coding_transcript_variant	MODIFIER	ABO	ENSG00000175164	Reported	CKB	C	T	0.32464	3.3e-32	-	-	UKBB	T	C	0.349975	111.651
Q13651	IL10RA	Q13651	rs59607805	ilmnseq_11:4456820	11	4456820	G	A	A	0.0525568	1056	-0.546465	0.0964272	1.87313e-08	trans	+	main	upstream_gene_variant	MODIFIER	OR52P2P	ENSG00000171999	Novel	-	-	-	-	-	-	-	-	-	-	-	-
Q08334	IL10RB	Q08334	rs8178528	rs8178528:34660980:A:G	21	34660980	A	G	G	0.246101	1026	0.484813	0.0461125	1.27287e-24	cis	+	main	intron_variant	MODIFIER	-	-	Reported	-	-	-	-	-	-	-	UKBB	A	G	0.469947	853.892
P29460	IL12B	P29460	rs9815073	imm_3_189598376	3	188115682	C	A	A	0.213542	1056	0.319564	0.0513634	7.08543e-10	trans	-	main	intron_variant	MODIFIER	LPP	ENSG00000145012	Reported	CKB	A	C	0.33052	4.7e-24	-	-	UKBB	C	A	0.304031	365.338
P29460	IL12B	P29460	rs10043720	rs10043720:158767333:A:G	5	158767333	G	A	A	0.1027	1037	-0.612166	0.0673504	4.95835e-19	cis	-	main	intron_variant&non_coding_transcript_variant	MODIFIER	AC008697.1	ENSG00000249738	Reported	-	-	-	-	-	-	-	UKBB	A	G	0.558107	1132.76
P42701	IL12RB1	P42701	11:60165352	11:60165352	11	60165353	D	I	I	0.340909	1056	-0.421366	0.0436744	3.64733e-21	trans	-	main	other	-	-	-	Novel	-	-	-	-	-	-	-	-	-	-	-	-
P42701	IL12RB1	P42701	rs381607	rs381607:18181010:A:G	19	18181010	A	G	G	0.343478	1035	-0.284497	0.0451753	4.46357e-10	cis	-	main	downstream_gene_variant	MODIFIER	IL12RB1	ENSG00000096996	Reported	CKB	G	A	-0.27376	3.5e-31	rs17887036	0.996	UKBB	A	G	-0.367354	458.306
Q13261	IL15RA	Q13261	rs2228059	rs2228059	10	6002368	T	G	G	0.411458	1056	-0.411214	0.0405433	3.95759e-23	cis	-	main	missense_variant	MODERATE	IL15RA	ENSG00000134470	Reported	CKB	G	T	-0.33644	1.9e-48	-	-	UKBB	T	G	-0.215069	176.526
Q13261	IL15RA	Q13261	rs2296139	rs2296139	10	6008172	C	T	T	0.345644	1056	-0.302529	0.0449514	2.77787e-11	cis	-	additional	intron_variant	MODIFIER	IL15RA	ENSG00000134470	Reported	-	-	-	-	-	-	-	UKBB	C	T	-0.138163	32.5047
Q14005	IL16	Q14005	rs4778636	rs4778636:81591639:G:A	15	81591639	G	A	A	0.225915	1038	-0.985521	0.03906	6.95218e-110	cis	+	main	intron_variant	MODIFIER	IL16	ENSG00000172349	Reported	CKB	G	T	-0.87966	5.5e-232	rs4778639	0.871	UKBB	G	A	-0.960118	1220.71
Q9NRM6	IL17RB	Q9NRM6	rs930367	rs930367	3	53873578	T	C	C	0.232955	1056	0.883465	0.0427611	6.86075e-80	cis	+	main	intron_variant	MODIFIER	CHDH	ENSG00000016391	Reported	CKB	G	A	-0.82647	6.9e-205	rs6801605	0.935	UKBB	T	C	0.344806	61.7981
Q14116	IL18	Q14116	rs11285790	rs11285790:32292827:CT:C	2	32292827	C	CT	CT	0.35249	1044	0.361651	0.0402764	1.24751e-18	trans	-	main	intron_variant	MODIFIER	SPAST	ENSG00000021574	Reported	-	-	-	-	-	-	-	UKBB	CT	C	-0.182221	137.062
Q13478	IL18R1	Q13478	rs10190555	rs10190555:102994056:A:G	2	102994056	A	G	G	0.481766	1042	-0.72355	0.0361255	9.9622e-76	cis	+	main	intron_variant	MODIFIER	IL18R1	ENSG00000115604	Reported	CKB	C	T	-0.70876	2e-202	rs12712145	0.996	UKBB	A	G	-0.897997	2215.15
Q13478	IL18R1	Q13478	rs6543144	rs6543144:103092575:A:G	2	103092575	A	G	G	0.0580952	1050	-1.02519	0.0854409	3.57674e-31	cis	+	additional	intron_variant	MODIFIER	SLC9A4	ENSG00000180251	Reported	CKB	G	A	-0.79022	4.5e-64	rs10169192	0.972	UKBB	A	G	-0.49473	822.525
P27930	IL1R2	P27930	rs7561460	rs7561460:102617204:T:C	2	102617204	T	C	C	0.436606	1049	-0.471225	0.0362682	6.79992e-36	cis	+	main	intron_variant	MODIFIER	IL1R2	ENSG00000115590	Reported	CKB	C	T	-0.55617	5.8e-129	-	-	UKBB	T	C	-0.515917	1018.27
Q9HB29	IL1RL2	Q9HB29	rs3771185	rs3771185	2	102840507	C	T	T	0.382576	1056	0.486316	0.0410271	1.62496e-30	cis	+	main	intron_variant	MODIFIER	IL1RL2	ENSG00000115598	Reported	CKB	C	T	-0.45542	9.2e-88	-	-	UKBB	T	C	-0.207144	179.547
P26951	IL3RA	P26951	rs8176749	rs8176749	9	136131188	C	T	T	0.22964	1056	0.509183	0.045276	8.60484e-28	trans	+	additional	non_coding_transcript_exon_variant	MODIFIER	ABO	ENSG00000175164	Reported	-	-	-	-	-	-	-	UKBB	C	T	0.493868	225.993
P26951	IL3RA	P26951	9:136139907:GAAACTGCC:G	9:136139907:GAAACTGCC:G	9	136139907	GAAACTGCC	G	G	0.205603	1053	-0.659477	0.0481955	2.41666e-39	trans	+	main	intron_variant&non_coding_transcript_variant	MODIFIER	ABO	ENSG00000175164	Reported	-	-	-	-	-	-	-	UKBB	GAAACTGCC	G	-0.486341	713.851
P24394	IL4R	P24394	rs11390919	rs11390919:27335598:T:TG	16	27335598	T	TG	TG	0.386515	1053	0.338403	0.0421193	2.51029e-15	cis	+	main	intron_variant	MODIFIER	IL4R	ENSG00000077238	Reported	-	-	-	-	-	-	-	UKBB	T	TG	0.260343	266.134
Q01344	IL5RA	Q01344	rs10604850	rs10604850:3149311:GTTGT:G	3	3149311	GTTGT	G	G	0.407805	1025	0.619363	0.0387837	1.99802e-51	cis	-	main	intron_variant	MODIFIER	IL5RA	ENSG00000091181	Reported	-	-	-	-	-	-	-	UKBB	GTTGT	G	0.214524	130.292
P18564	ITGB6	P18564	rs4426486	rs4426486:160971803:G:A	2	160971803	G	A	A	0.39843	1019	0.341676	0.0422853	1.82125e-15	cis	-	main	intron_variant	MODIFIER	ITGB6	ENSG00000115221	Reported	CKB	G	GA	0.2638	2.4e-29	rs57756134	0.857	UKBB	G	A	0.28862	300.779
P01591	JCHAIN	P01591	rs79851237	rs79851237:106030855:A:G	14	106030855	A	G	G	0.419712	1040	0.319971	0.039181	9.14988e-16	trans	-	main	intergenic_variant	MODIFIER	-	-	Novel	-	-	-	-	-	-	-	-	-	-	-	-
Q13241	KLRD1	Q13241	rs148158111	rs148158111:10469694:G:A	12	10469694	G	A	A	0.0540797	1054	0.768753	0.0889197	1.97e-17	cis	+	main	3_prime_UTR_variant	MODIFIER	KLRD1	ENSG00000134539	Reported	CKB	T	C	-0.86626	1.1e-66	rs2537773	1	-	-	-	-	-
Q13241	KLRD1	Q13241	rs17761883	rs17761883:52326010:C:T	19	52326010	C	T	T	0.204131	1041	-0.301461	0.0518422	8.06516e-09	trans	+	main	intron_variant	MODIFIER	FPR3	ENSG00000187474	Reported	CKB	A	G	-0.31853	3.7e-32	rs17695224	0.964	UKBB	C	T	-0.231452	99.4964
Q16719	KYNU	Q16719	rs2304705	rs2304705:143715265:G:A	2	143715265	G	A	A	0.0104563	1052	-1.65568	0.193166	3.61506e-17	cis	+	main	missense_variant	MODERATE	KYNU	ENSG00000115919	Reported	CKB	A	G	-1.193	1.1e-37	-	-	-	-	-	-	-
Q6GTX8	LAIR1	Q6GTX8	rs7257187	rs7257187	19	54867572	C	T	T	0.237216	1056	-0.447443	0.047172	1.54861e-20	cis	-	main	synonymous_variant	LOW	-	-	Reported	CKB	T	C	-0.48047	4e-66	rs55857639	0.821	UKBB	C	T	-0.119142	53.7531
Q6GTX8	LAIR1	Q6GTX8	rs192243939	ilmnseq_19:55019988	19	55019988	C	T	T	0.0370722	1052	-0.727723	0.107982	2.62032e-11	cis	-	additional	intron_variant	MODIFIER	-	-	Novel	-	-	-	-	-	-	-	-	-	-	-	-
Q9UQV4	LAMP3	Q9UQV4	rs200402675	rs200402675:182852108:GAA:GA	3	182852108	GA	GAA	GAA	0.343689	1030	-0.359825	0.0412862	1.14365e-17	cis	-	main	intron_variant	MODIFIER	LAMP3	ENSG00000078081	Novel	-	-	-	-	-	-	-	-	-	-	-	-
P56470	LGALS4	P56470	rs576125	9:136144309:G:A	9	136144309	G	A	A	0.433916	1029	-0.338457	0.0395134	3.88741e-17	trans	-	main	intron_variant&non_coding_transcript_variant	MODIFIER	ABO	ENSG00000175164	Reported	CKB	A	T	-0.15882	2e-10	rs657152	0.954	-	-	-	-	-
O00182	LGALS9	O00182	rs11080243	rs11080243:25964686:C:T	17	25964686	C	T	T	0.276699	1030	-0.625504	0.0423504	6.52337e-45	cis	+	main	intron_variant	MODIFIER	LGALS9	ENSG00000168961	Reported	CKB	C	CACACATGGA	-0.52922	1.5e-98	rs67997433	0.995	UKBB	C	T	-0.514772	819.549
Q9H008	LHPP	Q9H008	rs11245086	rs11245086	10	126163164	T	C	C	0.444129	1056	0.341922	0.036535	4.71121e-20	cis	+	main	intron_variant	MODIFIER	LHPP	ENSG00000107902	Reported	-	-	-	-	-	-	-	UKBB	C	T	-0.305332	359.707
P42702	LIFR	P42702	rs9411372	9:136134068:G:A	9	136134068	G	A	A	0.197471	1028	-0.352973	0.0524249	2.76323e-11	trans	-	main	intron_variant&non_coding_transcript_variant	MODIFIER	ABO	ENSG00000175164	Novel	-	-	-	-	-	-	-	-	-	-	-	-
Q8NHJ6	LILRB4	Q8NHJ6	rs9270194	rs9270194:32556159:T:A	6	32556159	A	T	T	0.131304	1051	0.573655	0.0584431	8.10988e-22	trans	+	main	intron_variant	MODIFIER	HLA-DRB1	ENSG00000196126	Reported	-	-	-	-	-	-	-	UKBB	T	A	-0.711795	1063.05
Q8NHJ6	LILRB4	Q8NHJ6	rs731170	exm1505791	19	55176262	G	A	A	0.249527	1056	0.29566	0.0464952	3.02118e-10	cis	+	main	downstream_gene_variant	MODIFIER	LILRB4	ENSG00000186818	Reported	CKB	A	G	0.23307	2.2e-18	-	-	UKBB	A	G	-0.24011	244.102
Q6UXK5	LRRN1	Q6UXK5	rs9839475	rs9839475:3807778:G:A	3	3807778	G	A	A	0.490759	1028	0.712539	0.0358379	1.15633e-74	cis	+	main	intron_variant&non_coding_transcript_variant	MODIFIER	SUMF1	ENSG00000144455	Reported	CKB	A	G	0.68474	2.2e-195	-	-	UKBB	G	A	0.81117	2232.61
P01374	LTA	P01374	rs2229092	rs2229092	6	31540757	A	C	C	0.016572	1056	-1.47705	0.15019	6.76252e-22	cis	+	main	missense_variant	MODERATE	LTA	ENSG00000226979	Reported	CKB	C	A	-1.8045	7.3e-79	-	-	UKBB	A	C	-1.4927	2102.11
P36941	LTBR	P36941	rs4301834	rs4301834:6500843:G:A	12	6500843	A	G	G	0.156069	1038	0.369479	0.0578066	2.47689e-10	cis	+	main	downstream_gene_variant	MODIFIER	LTBR	ENSG00000111321	Reported	CKB	A	G	-0.2886	2.6e-18	-	-	UKBB	G	A	-0.296188	275.32
Q14210	LY6D	Q14210	rs60096034	rs60096034:143859494:C:A	8	143859494	C	A	A	0.250733	1023	-0.480565	0.0453229	5.43297e-25	cis	-	main	5_prime_UTR_variant	MODIFIER	LYNX1	ENSG00000180155	Reported	CKB	T	C	-0.34328	2.6e-38	rs2585158	0.987	UKBB	C	A	-0.440224	727.489
O60449	LY75	O60449	rs78685880	exm235738	2	160706544	A	G	G	0.0350379	1056	-1.43987	0.110715	5.6932e-36	cis	-	additional	missense_variant	MODERATE	LY75	ENSG00000054219	Reported	-	-	-	-	-	-	-	Dhindsa_2023	A	G	-1.65869	5.98621e-09
O60449	LY75	O60449	rs3792198	rs3792198:160760338:G:A	2	160760338	G	A	A	0.253695	1015	0.845319	0.0435304	1.17428e-71	cis	-	main	intron_variant	MODIFIER	LY75	ENSG00000054219	Reported	CKB	A	G	0.80514	6.3e-210	rs7595388	0.928	UKBB	G	A	0.932071	3225
Q9HBG7	LY9	Q9HBG7	rs3831924	rs3831924:160766179:C:CT	1	160766179	CT	C	C	0.400385	1039	-0.580888	0.0385582	1.57528e-46	cis	+	main	intron_variant	MODIFIER	LY9	ENSG00000122224	Reported	-	-	-	-	-	-	-	UKBB	C	CT	0.354282	406.292
Q9HBG7	LY9	Q9HBG7	rs4656942	rs4656942	1	160831048	G	A	A	0.295928	1056	0.525003	0.0435822	2.10763e-31	cis	+	additional	intron_variant	MODIFIER	CD244	ENSG00000122223	Reported	-	-	-	-	-	-	-	UKBB	G	A	0.444546	516.895
Q96KG7	MEGF10	Q96KG7	rs1422313	rs1422313:126630016:C:T	5	126630016	C	T	T	0.309229	1051	0.517566	0.043883	3.08837e-30	cis	+	main	intron_variant	MODIFIER	MEGF10	ENSG00000145794	Reported	CKB	A	T	0.45586	1.7e-73	rs2059083	0.996	UKBB	C	T	0.396662	643.233
Q96KG7	MEGF10	Q96KG7	rs10519940	rs10519940:126775922:T:C	5	126775922	T	C	C	0.0582386	1056	0.919819	0.086123	2.36045e-25	cis	+	additional	intron_variant	MODIFIER	MEGF10	ENSG00000145794	Reported	-	-	-	-	-	-	-	UKBB	T	C	0.832857	399.685
Q9NQ76	MEPE	Q9NQ76	rs4693184	rs4693184:88752027:C:T	4	88752027	C	T	T	0.32457	1046	-0.233644	0.0410081	1.58034e-08	cis	+	main	upstream_gene_variant	MODIFIER	MEPE	ENSG00000152595	Reported	CKB	T	C	-0.19938	1.4e-15	rs28464861	0.923	UKBB	C	T	-0.183144	68.621
Q12866	MERTK	Q12866	rs2311812	rs2311812:112656908:A:G	2	112656908	G	A	A	0.193373	1011	-0.305574	0.046781	1.0271e-10	cis	+	main	intron_variant	MODIFIER	MERTK	ENSG00000153208	Reported	-	-	-	-	-	-	-	UKBB	A	G	0.223894	197.731
Q29980_Q29983	MICB_MICA	Q29980_Q29983	rs201959988	rs201959988	2	179306420	A	G	G	0.0104167	1056	1.34005	0.198765	2.57076e-11	trans	+	main	missense_variant	MODERATE	PRKRA	ENSG00000180228	Reported	-	-	-	-	-	-	-	UKBB	C	T	0.274058	63.9051
Q29980_Q29983	MICB_MICA	Q29980_Q29983	rs28380929	rs28380929:31319603:C:T	6	31319603	C	T	T	0.0563981	1055	0.663936	0.0868531	4.71467e-14	cis	+	additional	downstream_gene_variant	MODIFIER	HLA-B	ENSG00000234745	Reported	-	-	-	-	-	-	-	UKBB	T	C	0.612529	1313.8
Q29980_Q29983	MICB_MICA	Q29980_Q29983	rs2596498	rs2596498:31322688:T:C	6	31322688	T	C	C	0.132576	1056	0.866729	0.0535765	9.5348e-53	cis	+	additional	intron_variant	MODIFIER	HLA-B	ENSG00000234745	Reported	-	-	-	-	-	-	-	UKBB	C	G	-0.479502	812.087
Q29980_Q29983	MICB_MICA	Q29980_Q29983	rs2523468	rs2523468:31362891:C:G	6	31362891	G	C	C	0.369094	1016	0.813594	0.0345701	4.59258e-98	cis	+	main	non_coding_transcript_exon_variant	MODIFIER	XXbac-BPG181B23.7	ENSG00000272221	Novel	-	-	-	-	-	-	-	-	-	-	-	-
Q7Z6M3	MILR1	Q7Z6M3	rs74502377	rs74502377	17	62521774	C	T	T	0.0643939	1056	0.531482	0.0832554	2.58504e-10	cis	+	main	intron_variant,NMD_transcript_variant	MODIFIER	CEP95	ENSG00000258890	Reported	CKB	A	G	0.42642	1.8e-20	rs118010167	0.938	-	-	-	-	-
P12872	MLN	P12872	rs56237081	kgp10670983	2	222036237	C	T	T	0.217803	1056	-0.268781	0.0478603	2.49981e-08	trans	-	main	intergenic_variant	MODIFIER	-	-	Reported	CKB	A	G	-0.2793	2.1e-23	rs16862260	0.909	UKBB	C	T	-0.201021	128.284
P12872	MLN	P12872	rs1547671	rs1547671:33777260:C:T	6	33777260	T	C	C	0.186013	1051	0.379847	0.0513048	2.71289e-13	cis	-	main	intergenic_variant	MODIFIER	-	-	Reported	-	-	-	-	-	-	-	UKBB	C	T	-0.414229	743.545
P03956	MMP1	P03956	rs519166	rs519166:102688204:A:T	11	102688204	T	A	A	0.423304	1017	0.464094	0.0421606	1.05924e-26	cis	-	main	intron_variant&non_coding_transcript_variant	MODIFIER	WTAPP1	ENSG00000255282	Reported	CKB	G	C	-0.40972	4.4e-71	rs683878	0.98	UKBB	A	T	-0.446785	599.971
P09238	MMP10	P09238	rs2846367	rs2846367:102531156:C:G	11	102531156	C	G	G	0.338819	1033	-0.250758	0.0451886	3.64925e-08	cis	-	main	intron_variant,non_coding_transcript_variant	MODIFIER	-	ENSG00000281655	Reported	-	-	-	-	-	-	-	UKBB	C	G	-0.0618727	15.2437
Q8WU39	MZB1	Q8WU39	rs117172466	rs117172466:138523511:C:T	5	138523511	C	T	T	0.0156695	1053	-1.66263	0.16506	7.61682e-23	cis	-	main	intron_variant	MODIFIER	SIL1	ENSG00000120725	Novel	-	-	-	-	-	-	-	-	-	-	-	-
Q8WU39	MZB1	Q8WU39	rs34562254	rs34562254:16842991:G:A	17	16842991	G	A	A	0.349214	1018	0.261156	0.0449258	8.20665e-09	trans	-	main	missense_variant	MODERATE	TNFRSF13B	ENSG00000240505	Reported	CKB	T	C	0.1341	4e-09	rs4561508	0.874	UKBB	G	A	0.155858	35.5543
O76036	NCR1	O76036	rs7255591	rs7255591:55416170:G:C	19	55416170	G	C	C	0.360116	1033	-0.624047	0.0421852	4.7756e-45	cis	+	main	upstream_gene_variant	MODIFIER	NCR1	ENSG00000189430	Reported	CKB	T	C	0.5921	4e-134	rs143981324	0.917	UKBB	G	C	-0.426285	235.354
O94856	NFASC	O94856	rs12041025	rs12041025:204832854:G:A	1	204832854	G	A	A	0.411535	1023	0.233127	0.039577	5.22348e-09	cis	+	main	intron_variant	MODIFIER	NFASC	ENSG00000163531	Reported	CKB	A	T	0.27703	2.1e-31	rs11801418	0.926	UKBB	G	A	0.398961	184.999
Q13232	NME3	Q13232	rs12598531	kgp16234228	16	1702366	G	A	A	0.0241706	1055	-1.587	0.129947	3.5566e-32	cis	-	main	upstream_gene_variant	MODIFIER	CRAMP1L	ENSG00000007545	Novel	-	-	-	-	-	-	-	-	-	-	-	-
Q99983	OMD	Q99983	rs7086042	rs7086042:35040640:C:T	10	35040640	T	C	C	0.275243	1030	-0.271312	0.0489118	3.6962e-08	trans	-	main	intron_variant	MODIFIER	PARD3	ENSG00000148498	Novel	-	-	-	-	-	-	-	-	-	-	-	-
Q8IYS5	OSCAR	Q8IYS5	rs73060647	rs73060647:54577969:T:C	19	54577969	T	C	C	0.0649802	1008	0.600133	0.0864757	7.0206e-12	cis	-	additional	intron_variant	MODIFIER	-	-	Novel	-	-	-	-	-	-	-	-	-	-	-	-
Q8IYS5	OSCAR	Q8IYS5	rs11669029	rs11669029	19	54596619	G	A	A	0.439394	1056	0.417337	0.0400115	2.61887e-24	cis	-	main	downstream_gene_variant	MODIFIER	OSCAR	ENSG00000170909	Reported	CKB	A	G	0.46012	1e-87	-	-	UKBB	G	A	0.167181	106.626
Q8IYS5	OSCAR	Q8IYS5	rs73062626	rs73062626:54614323:C:G	19	54614323	C	G	G	0.218571	1050	0.331931	0.0494106	3.02114e-11	cis	-	additional	downstream_gene_variant	MODIFIER	-	-	Reported	-	-	-	-	-	-	-	UKBB	C	G	0.199898	92.9449
P13725	OSM	P13725	rs2511241	kgp11190046	11	72945341	T	C	C	0.113636	1056	-0.471442	0.0668351	3.14741e-12	trans	-	main	missense_variant	MODERATE	P2RY2	ENSG00000175591	Reported	CKB	T	C	0.30164	1.9e-16	-	-	UKBB	C	T	0.362326	135.366
Q03405	PLAUR	Q03405	rs3760977	kgp21549152	19	44174419	C	T	T	0.0430871	1056	1.73612	0.0878967	3.95692e-74	cis	-	main	5_prime_UTR_variant	MODIFIER	PLAUR	ENSG00000011422	Reported	CKB	T	C	1.5729	1.1e-166	-	-	-	-	-	-	-
P54317	PNLIPRP2	P54317	rs7910135	rs7910135:118398046:C:A	10	118398046	C	A	A	0.286127	1038	1.22131	0.0300699	1.61974e-216	cis	+	main	intron_variant&non_coding_transcript_variant	MODIFIER	PNLIPRP2	ENSG00000165862	Reported	-	-	-	-	-	-	-	UKBB	C	A	1.13595	4863.02
Q15166	PON3	Q15166	rs141350740	rs141350740	7	94996741	A	G	G	0.0160985	1056	-1.24472	0.159799	1.60683e-14	cis	-	main	missense_variant	MODERATE	-	-	Reported	CKB	G	A	-1.347	4.9e-33	-	-	-	-	-	-	-
P58294	PROK1	P58294	rs1857512	rs1857512	1	110993349	G	A	A	0.063447	1056	0.755139	0.0714985	7.44436e-25	cis	+	main	upstream_gene_variant	MODIFIER	PROK1	ENSG00000143125	Reported	CKB	T	C	0.71808	1.8e-61	rs74116704	0.964	UKBB	G	A	0.478929	856.911
P28827	PTPRM	P28827	rs8176751	rs8176751:136131022:C:T	9	136131022	C	T	T	0.231025	1054	1.00212	0.0374014	5.57117e-121	trans	+	main	non_coding_transcript_exon_variant	MODIFIER	ABO	ENSG00000175164	Reported	CKB	C	G	0.87498	7.4e-225	rs7853989	0.962	UKBB	C	T	0.847783	863.5
P28827	PTPRM	P28827	9:136139907:GAAACTGCC:G	9:136139907:GAAACTGCC:G	9	136139907	GAAACTGCC	G	G	0.205603	1053	-0.761969	0.0472966	2.35554e-52	trans	+	additional	intron_variant&non_coding_transcript_variant	MODIFIER	ABO	ENSG00000175164	Reported	-	-	-	-	-	-	-	UKBB	GAAACTGCC	G	-0.529653	827.86
P26022	PTX3	P26022	rs7629573	rs7629573:126265857:G:C	3	126265857	G	C	C	0.212136	1030	0.288817	0.0519363	3.41938e-08	trans	+	main	downstream_gene_variant	MODIFIER	C3orf22	ENSG00000180697	Reported	CKB	A	G	0.216	2e-15	rs1056522	0.979	UKBB	G	C	0.23731	167.489
Q9BYZ8	REG4	Q9BYZ8	rs3009195	rs3009195	1	120366712	A	G	G	0.495265	1056	-0.249566	0.041291	2.0824e-09	cis	-	main	intergenic_variant	MODIFIER	-	-	Reported	-	-	-	-	-	-	-	UKBB	A	G	-0.156717	66.9498
Q9Y6N7	ROBO1	Q9Y6N7	rs17016412	rs17016412:78670573:A:C	3	78670573	A	C	C	0.405598	1054	0.270129	0.0422899	2.52597e-10	cis	-	main	intron_variant	MODIFIER	ROBO1	ENSG00000169855	Reported	-	-	-	-	-	-	-	UKBB	A	C	0.167819	82.8968
Q8IVG5	SAMD9L	Q8IVG5	rs2073793	kgp9380899	7	92764419	A	G	G	0.0724432	1056	-0.863807	0.0765401	5.76755e-28	cis	-	main	missense_variant	MODERATE	-	-	Reported	CKB	G	A	-0.97989	6.1e-118	-	-	UKBB	A	G	-0.925576	138.772
Q8WXD2	SCG3	Q8WXD2	rs8038520	rs8038520:51738769:A:G	15	51738769	A	G	G	0.087619	1050	0.635677	0.0694427	2.79804e-19	cis	+	main	downstream_gene_variant	MODIFIER	DMXL2	ENSG00000104093	Novel	-	-	-	-	-	-	-	-	-	-	-	-
Q8WXD2	SCG3	Q8WXD2	rs12441870	rs12441870:51813009:G:A	15	51813009	G	A	A	0.0555556	1044	-0.794197	0.087541	5.67131e-19	cis	+	additional	intron_variant	MODIFIER	-	-	Reported	CKB	C	T	-0.66721	1.9e-33	rs16964357	0.849	UKBB	G	A	-0.595057	159.376
P11684	SCGB1A1	P11684	rs2509956	rs2509956:62196723:T:C	11	62196723	T	C	C	0.380693	1010	-0.405281	0.0421159	4.95996e-21	cis	+	main	downstream_gene_variant	MODIFIER	AHNAK	ENSG00000124942	Reported	CKB	A	G	-0.29432	2.3e-37	rs3741240	0.855	UKBB	T	C	-0.279747	288.176
Q96PL1	SCGB3A2	Q96PL1	rs3777126	rs3777126:147203906:T:A	5	147203906	A	T	T	0.184985	1019	0.48381	0.054606	3.50789e-18	cis	+	main	downstream_gene_variant	MODIFIER	SPINK1	ENSG00000164266	Reported	-	-	-	-	-	-	-	UKBB	T	A	-0.126514	61.8553
Q14242	SELPLG	Q14242	rs10819317	rs10819317	9	130668957	A	G	G	0.40483	1056	0.390846	0.0411248	1.31459e-20	trans	-	main	downstream_gene_variant	MODIFIER	ST6GALNAC4	ENSG00000136840	Reported	CKB	G	A	0.17149	1.7e-13	-	-	UKBB	A	G	0.0962681	23.1273
P50452	SERPINB8	P50452	rs3826616	exm1391359	18	61654463	G	A	A	0.463068	1056	0.914219	0.0327117	4.63963e-129	cis	+	main	3_prime_UTR_variant	MODIFIER	SERPINB8	ENSG00000166401	Reported	CKB	G	A	-0.73301	3.1e-221	-	-	UKBB	A	G	-0.726747	2009.66
P34896	SHMT1	P34896	rs12946752	rs12946752:18176423:C:T	17	18176423	T	C	C	0.464762	1050	-0.372978	0.041948	2.58743e-18	cis	-	main	downstream_gene_variant	MODIFIER	TOP3A	ENSG00000177302	Reported	CKB	C	G	0.46209	1.5e-92	rs669340	0.945	UKBB	C	T	0.677575	1559.57
Q96LC7	SIGLEC10	Q96LC7	rs6509535	ilmnseq_19:51915953	19	51915953	A	C	C	0.206913	1056	-0.479052	0.0509326	3.12502e-20	cis	-	main	intron_variant	MODIFIER	SIGLEC10	ENSG00000142512	Reported	-	-	-	-	-	-	-	UKBB	A	C	-0.26325	250.048
O00241	SIRPB1	O00241	rs12479867	rs12479867:1507879:G:T	20	1507879	G	T	T	0.205065	1007	0.570844	0.049062	1.91423e-29	cis	-	main	downstream_gene_variant	MODIFIER	RNU6-917P	ENSG00000252103	Reported	CKB	A	G	0.39602	1.4e-41	rs6135163	0.946	UKBB	G	T	0.686254	754.011
O00241	SIRPB1	O00241	rs2254458	rs2254458:1551485:C:T	20	1551485	T	C	C	0.206913	1056	-0.470486	0.0487098	3.30359e-21	cis	-	additional	intron_variant	MODIFIER	SIRPB1	ENSG00000101307	Reported	CKB	A	G	0.35147	5.1e-36	rs3848788	0.84	UKBB	C	T	0.627907	1409.64
Q9NQ25	SLAMF7	Q9NQ25	rs3766370	rs3766370:160711477:C:T	1	160711477	C	T	T	0.142105	1045	-0.420749	0.0604315	5.90853e-12	cis	+	main	intron_variant	MODIFIER	SLAMF7	ENSG00000026751	Reported	-	-	-	-	-	-	-	UKBB	C	T	-0.586074	1175.62
Q9H3U7	SMOC2	Q9H3U7	rs13217628	rs13217628:168875344:C:T	6	168875344	C	T	T	0.481973	1054	0.423074	0.0365378	2.87309e-29	cis	+	main	intron_variant	MODIFIER	SMOC2	ENSG00000112562	Reported	CKB	T	C	0.39706	1.5e-68	rs9456100	0.965	UKBB	C	T	0.232036	98.1589
Q92484	SMPDL3A	Q92484	rs7382472	rs7382472:123124578:T:C	6	123124578	T	C	C	0.326628	1044	-0.345463	0.0441088	1.17709e-14	cis	+	main	intron_variant	MODIFIER	SMPDL3A	ENSG00000172594	Reported	CKB	A	G	-0.33627	8.9e-45	rs1485662	0.956	UKBB	T	C	-0.389352	266.958
Q92484	SMPDL3A	Q92484	rs2695288	rs2695288:102088112:T:C	12	102088112	T	C	C	0.392447	1046	0.272929	0.0432255	4.0132e-10	trans	+	additional	upstream_gene_variant	MODIFIER	CHPT1	ENSG00000111666	Reported	-	-	-	-	-	-	-	UKBB	T	C	0.317855	523.798
Q92484	SMPDL3A	Q92484	rs77846710	rs77846710:102178627:T:C	12	102178627	T	C	C	0.100668	1048	-0.522497	0.0698391	1.55462e-13	trans	+	main	intron_variant	MODIFIER	GNPTAB	ENSG00000111670	Reported	-	-	-	-	-	-	-	UKBB	T	C	-0.182727	77.836
O60575	SPINK4	O60575	rs830407	rs830407	9	33217266	G	A	A	0.109375	1056	1.00811	0.0570071	1.74871e-61	cis	+	main	upstream_gene_variant	MODIFIER	SPINK4	ENSG00000122711	Reported	-	-	-	-	-	-	-	UKBB	G	A	0.935958	1289.16
O43291	SPINT2	O43291	rs4802327	rs4802327	19	38793319	G	A	A	0.108902	1056	-0.40181	0.0680185	4.68671e-09	cis	+	main	upstream_gene_variant	MODIFIER	C19orf33	ENSG00000167644	Reported	-	-	-	-	-	-	-	UKBB	G	A	-0.148387	45.8552
Q9HCB6	SPON1	Q9HCB6	rs72828540	rs72828540:19102286:T:C	6	19102286	T	C	C	0.164557	1027	-0.309012	0.0550729	2.5882e-08	trans	+	main	intron_variant,non_coding_transcript_variant	MODIFIER	-	ENSG00000300612	Novel	-	-	-	-	-	-	-	-	-	-	-	-
Q9HCB6	SPON1	Q9HCB6	rs35270038	rs35270038:14082493:T:TAA	11	14082493	T	TAA	TAA	0.320297	1010	0.512951	0.0412575	4.04498e-33	cis	+	main	intron_variant&non_coding_transcript_variant	MODIFIER	SPON1	ENSG00000152268	Novel	-	-	-	-	-	-	-	-	-	-	-	-
P35625	TIMP3	P35625	rs5749506	rs5749506:33167223:C:T	22	33167223	T	C	C	0.393353	1008	0.632901	0.041046	2.58908e-48	cis	+	main	intron_variant	MODIFIER	-	-	Reported	CKB	G	GCC	-0.52761	2.2e-118	rs59896920	0.834	UKBB	C	T	-0.651302	1306.65
O15455	TLR3	O15455	rs36035924	rs36035924	4	186986687	A	G	G	0.410511	1056	-0.721222	0.0371501	5.1394e-72	cis	+	additional	upstream_gene_variant	MODIFIER	TLR3	ENSG00000164342	Reported	-	-	-	-	-	-	-	UKBB	A	G	-0.728027	1967.87
O15455	TLR3	O15455	rs3775291	rs3775291	4	187004074	C	T	T	0.296875	1056	-1.14633	0.0302324	3.89812e-199	cis	+	main	missense_variant	MODERATE	TLR3	ENSG00000164342	Reported	CKB	T	C	-1.1107	1.99999996731943e-317	-	-	UKBB	C	T	-1.15053	4228.87
Q9Y6Q6	TNFRSF11A	Q9Y6Q6	rs884205	rs884205	18	60054857	C	A	A	0.214489	1056	0.357995	0.0497661	1.19587e-12	cis	+	main	3_prime_UTR_variant	MODIFIER	TNFRSF11A	ENSG00000141655	Reported	-	-	-	-	-	-	-	UKBB	A	C	-0.500032	753.991
O00300	TNFRSF11B	O00300	rs1905775	rs1905775:120088835:A:G	8	120088835	A	G	G	0.446293	1052	0.400266	0.0388056	7.93559e-24	cis	-	main	intron_variant	MODIFIER	COLEC10	ENSG00000184374	Reported	-	-	-	-	-	-	-	UKBB	A	G	0.184112	149.416
Q96RJ3	TNFRSF13C	Q96RJ3	rs77874543	rs77874543:42322716:G:C	22	42322716	G	C	C	0.0394352	1027	-0.896653	0.106516	1.27664e-16	cis	-	additional	missense_variant	MODERATE	-	-	Reported	CKB	C	G	-0.71953	1.4e-44	-	-	UKBB	G	C	-0.795637	708.087
Q96RJ3	TNFRSF13C	Q96RJ3	rs28722907	ilmnseq_22:42348062	22	42348062	G	A	A	0.0213068	1056	-1.24332	0.142841	1.21409e-17	cis	-	main	upstream_gene_variant	MODIFIER	CENPM	ENSG00000100162	Reported	-	-	-	-	-	-	-	UKBB	G	A	-0.135134	24.7645
P43489	TNFRSF4	P43489	rs115461163	rs115461163	8	4423499	A	C	C	0.0743371	1056	-0.454512	0.0811903	2.76283e-08	trans	-	main	intron_variant	MODIFIER	CSMD1	ENSG00000183117	Novel	-	-	-	-	-	-	-	-	-	-	-	-
P50591	TNFSF10	P50591	rs2304456	rs2304456	3	186445052	T	G	G	0.169034	1056	-0.30657	0.0546169	2.54015e-08	trans	-	main	missense_variant	MODERATE	KNG1	ENSG00000113889	Reported	-	-	-	-	-	-	-	UKBB	T	G	-0.138649	33.8332
O14788	TNFSF11	O14788	rs2465404	rs2465404:120090859:G:T	8	120090859	G	T	T	0.446023	1056	-0.314445	0.0403048	1.46415e-14	trans	+	main	intron_variant	MODIFIER	COLEC10	ENSG00000184374	Reported	CKB	T	G	-0.28553	4.9e-36	-	-	UKBB	G	T	-0.194443	142.877
O75888	TNFSF13	O75888	rs3803800	rs3803800	17	7462969	G	A	A	0.3125	1056	0.412876	0.0420026	7.0632e-22	cis	+	main	downstream_gene_variant	MODIFIER	TNFSF12	ENSG00000239697	Reported	CKB	G	A	-0.36234	1.1e-50	-	-	UKBB	A	G	-0.324686	306.39
O75888	TNFSF13	O75888	rs2075230	rs2075230	17	7487108	A	G	G	0.383049	1056	-0.269791	0.0410197	7.53811e-11	cis	+	additional	downstream_gene_variant	MODIFIER	SOX15	ENSG00000129194	Reported	-	-	-	-	-	-	-	Koprulu_2023	A	G	-0.237	3.326e-05
Q15661	TPSAB1	Q15661	rs4984639	kgp11073542	16	1272865	A	G	G	0.0923295	1056	-0.916326	0.0673203	5.48394e-39	cis	+	main	synonymous_variant	LOW	TPSG1	ENSG00000116176	Reported	CKB	C	T	-0.97149	6.7e-122	rs115107568	0.967	UKBB	G	A	0.676751	1403.74
Q9NZC2	TREM2	Q9NZC2	rs6591561	rs6591561:60070176:A:G	11	60070176	A	G	G	0.36224	1009	-0.365966	0.0418645	9.46997e-18	trans	-	main	missense_variant	MODERATE	MS4A4A	ENSG00000110079	Reported	CKB	G	A	-0.35753	2e-54	-	-	UKBB	A	G	-0.298164	318.839
P15692	VEGFA	P15692	rs6921438	rs6921438:43925607:G:A	6	43925607	G	A	A	0.372963	1043	-0.355286	0.0429845	4.20476e-16	cis	+	main	intergenic_variant	MODIFIER	-	-	Reported	CKB	A	G	-0.40148	1.3e-63	-	-	UKBB	G	A	-0.687849	1884.74
O43915	VEGFD	O43915	rs12685968	kgp27378180	9	117093939	G	C	C	0.0549242	1056	1.06773	0.0873151	2.98944e-32	trans	-	main	downstream_gene_variant	MODIFIER	AKNA	ENSG00000106948	Reported	CKB	C	G	0.95971	4.4e-82	-	-	-	-	-	-	-
Q8TEU8	WFIKKN2	Q8TEU8	rs10853117	rs10853117	17	48907597	G	A	A	0.310606	1056	-0.685975	0.0416994	2.68447e-54	cis	+	main	upstream_gene_variant	MODIFIER	WFIKKN2	ENSG00000173714	Reported	-	-	-	-	-	-	-	UKBB	G	A	-0.679575	1596.16

## Sheet: Table S4
Table S4: Proportion of variance explained by independent lead pQTLs
Protein	UniProt	PVE	Type
PNLIPRP2	P54317	0.609343	cis
CD200R1	Q8TD46	0.601646	cis
FCRL3	Q96P31	0.587289	cis
TLR3	O15455	0.5486	cis
ENPP7	Q6UWV6	0.498393	both
SERPINB8	P50452	0.415618	cis
PTPRM	P28827	0.356813	trans
MICB_MICA	Q29980_Q29983	0.345303	both
IL16	Q14005	0.3397	cis
CD276	Q5ZPR3	0.337116	cis
FCAR	P24071	0.334041	cis
FCRL2	Q96LA5	0.29082	both
CEACAM21	Q3KPI0	0.285073	cis
IL17RB	Q9NRM6	0.278934	cis
CTRC	Q99895	0.27177	trans
CCL25	O15444	0.270583	both
LY75	O60449	0.270582	cis
ANXA11	P50995	0.268084	trans
IL18R1	Q13478	0.261414	cis
LRRN1	Q6UXK5	0.253769	cis
PLAUR	Q03405	0.248547	cis
FGF5	P12034	0.228811	cis
CLEC4C	Q8WTT0	0.227461	both
FCRL6	Q6DN72	0.212552	cis
CD6	P30203	0.204465	cis
WFIKKN2	Q8TEU8	0.201523	cis
SPINK4	O60575	0.197997	cis
GZMB	P10144	0.194872	both
TIMP3	P35625	0.19117	cis
IL5RA	Q01344	0.185284	cis
CLEC4D	Q8WXI8	0.183354	cis
NCR1	O76036	0.179477	cis
CD40	P25942	0.174266	cis
CD244	Q9BZW8	0.171073	cis
CD70	P32970	0.165511	both
AGRP	O00253	0.162615	cis
LY9	Q9HBG7	0.162019	cis
BTN3A2	P78410	0.158721	cis
LGALS9	O00182	0.156609	cis
IL3RA	P26951	0.142068	trans
SPON1	Q9HCB6	0.140821	both
TPSAB1	Q15661	0.140734	cis
CCL23	P55773	0.136741	cis
ALDH3A1	P30838	0.128242	cis
CNTNAP2	Q9UHC6	0.125324	cis
CCL13	Q99616	0.123806	cis
CKAP4	Q07065	0.12113	cis
NME3	Q13232	0.118808	cis
FIGF	O43915	0.118354	trans
CRHBP	P24387	0.11659	cis
IL12RB1	P42701	0.116291	both
MZB1	Q8WU39	0.116274	both
MEGF10	Q96KG7	0.114439	cis
IL1RL2	Q9HB29	0.11173	cis
HLA-DRA	P01903	0.109698	cis
CDSN	Q15517	0.109485	cis
IL1R2	P27930	0.109242	cis
LILRB4	Q8NHJ6	0.107811	both
SIRPB1	O00241	0.10624	cis
B4GALT1	P15291	0.105601	both
MMP1	P03956	0.105158	cis
IFNGR1	P15260	0.104125	both
IL12B	P29460	0.103369	both
CST7	O76096	0.102311	cis
SMPDL3A	Q92484	0.10193	both
SAMD9L	Q8IVG5	0.100277	cis
BTN2A1	Q7KYR7	0.0982955	cis
ENPP5	Q9UJA9	0.0955423	cis
CLEC7A	Q9BXN2	0.0934012	cis
CCL22	O00626	0.0918152	both
KLRD1	Q13241	0.089992	both
SMOC2	Q9H3U7	0.0893795	cis
CD200	P41217	0.0873327	both
IL10RB	Q08334	0.0872178	cis
LY6D	Q14210	0.0867726	cis
OSCAR	Q8IYS5	0.0858056	cis
CCL24	O00175	0.0854332	cis
GALNT3	Q14435	0.0831494	both
IL15RA	Q13261	0.0818971	cis
CXCL6	P80162	0.0816928	cis
CLSTN2	Q9H4D0	0.0803807	cis
CXCL1	P09341	0.0799306	cis
TNFRSF11B	O00300	0.0791822	cis
SCGB1A1	P11684	0.0774503	cis
C1QA	P02745	0.0767442	cis
SIGLEC10	Q96LC7	0.0753189	cis
ADAM23	O75077	0.0741983	cis
SELPLG	Q14242	0.0736131	trans
TNFSF13	O75888	0.0732474	cis
LAIR1	Q6GTX8	0.0724521	cis
LTA	P01374	0.0711112	cis
SCGB3A2	Q96PL1	0.07058	cis
CXADR	P78310	0.0695004	trans
SHMT1	P34896	0.0692108	cis
FABP9	Q0Z7S8	0.0685983	trans
MLN	P12872	0.068308	both
PROK1	P58294	0.0677684	cis
SCG3	Q8WXD2	0.0646067	cis
TNFRSF13C	Q96RJ3	0.0644704	cis
CLEC4G	Q6UXB4	0.0630903	trans
AOC1	P19801	0.0630123	cis
TREM2	Q9NZC2	0.0618821	trans
IL18	Q14116	0.0597039	trans
VEGFA	P15692	0.0590398	cis
LAMP3	Q9UQV4	0.0584101	cis
LHPP	Q9H008	0.0577254	cis
CD58	P19256	0.0569683	trans
KYNU	Q16719	0.0567278	cis
LGALS4	P56470	0.056276	trans
ITGB6	P18564	0.0559625	cis
GMPR	P36959	0.0551511	cis
AGER	Q15109	0.0550618	cis
IL4R	P24394	0.0543086	cis
CCL3	P10147	0.0525416	cis
IGJ	P01591	0.0498708	trans
PON3	Q15166	0.0490807	cis
EPHA1	P21709	0.0490226	both
TNFSF11	O14788	0.0488617	trans
CRELD2	Q6UXH1	0.0481031	cis
CCL7	P80098	0.0459247	trans
CD22	P20273	0.0448854	cis
OSM	P13725	0.0447728	trans
ICAM4	Q14773	0.0441384	trans
AGRN	O00468	0.0436596	cis
TNFRSF11A	Q9Y6Q6	0.0431858	cis
SLAMF7	Q9NQ25	0.0431638	cis
CD79B	P40259	0.0428375	trans
AMN	Q9BXJ7	0.0422668	cis
CD160	O95971	0.0422067	cis
CKMT1B	P12532	0.0411487	cis
LIFR	P42702	0.0394891	trans
FABP1	P07148	0.0363632	cis
LTBR	P36941	0.0359611	cis
ROBO1	Q9Y6N7	0.0351843	cis
GZMA	P12544	0.0349597	cis
MILR1	Q7Z6M3	0.0340365	cis
SPINT2	O43291	0.0313352	cis
REG4	Q9BYZ8	0.0311388	cis
IL10RA	Q13651	0.0297397	trans
OMD	Q99983	0.0293682	trans
MERTK	Q12866	0.0291294	cis
CCL4	P13236	0.0289593	cis
CD4	P01730	0.0288283	cis
TNFRSF4	P43489	0.0284302	trans
MMP10	P09238	0.0281727	cis
PTX3	P26022	0.0278831	trans
ANGPTL4	Q9BY76	0.0277264	trans
COL9A1	P20849	0.0275148	cis
CSF3	P09919	0.0271365	cis
TNFSF10	P50591	0.0264026	trans
NFASC	O94856	0.0263234	cis
EGLN1	Q9GZT9	0.0260774	cis
FST	P19883	0.0255164	trans
BSG	P35613	0.0248982	trans
MEPE	Q9NQ76	0.0239347	cis

## Sheet: Table S5
Table S5: Previous proteomic studies for assessing signal novelty
Short Name	Title	Year	Author	PMID	Publication	Published/Preprint	Protein measurement method/technology	Tissue	#Protein	#pQTL	#Sample	Population
Gilly_2020	Whole-genome sequencing analysis of the cardiometabolic proteome	2020	Gilly	33303764	Nat Comm	published	PEA/OLINK	serum	275	116	1328	European
Ruffieux_2020	A fully joint Bayesian quantitative trait locus mapping of human protein abundance in plasma	2020	Ruffieux	32492067	PLoS Comput Biol	published	MS proteomics (130) and Aptamer-based (1100)	plasma	1230	136 (MS 18, SomaScan 118)	2433	European
Zhong_2020	Whole-genome sequence association analysis of blood proteins in a longitudinal wellness cohort	2020	Zhong	32576278	BMC Genome Med	published	PEA/OLINK	plasma	794	144	101	European
Bretherick_2020	Linking protein to phenotype with Mendelian Randomization detects 38 proteins with causal roles in human diseases and traits	2020	Bretherick	32628676	PLoS Genetics	published	PEA/OLINK	plasma	249	209	909	European
Hillary_2020	Multi-method genome- and epigenome-wide studies of inflammatory protein levels in healthy older adults	2020	Hillary	32641083	Genome Medicine	published	PEA/OLINK	plasma	70	13	876	European
Ferkingstad_2021	Large-scale integration of the plasma proteome with genetics and disease	2021	Ferkingstad	34857953	Nature Genetics	published	Aptamer-based/SomaScan	plasma	4719	28191	35559	European
Pietzner_2021	Mapping the proteo-genomic convergence of human diseases	2021	Pietzner	34648354	Science	published	Aptamer-based/SomaScan	plasma	3892	10674	10708	European
Png_2021	Mapping the serum proteome to neurological diseases using whole genome sequencing	2021	Png	34857772	Nat Comm	published	PEA/OLINK	serum	184	214	2893	European
Gudjonsson_2022	A genome-wide association study of serum proteins reveals shared loci with common diseases	2022	Gudjonsson	35078996	Nat Comm	published	Aptamer-based/SomaScan	serum	4782	4035	5368	European
Hansson_2023	The genetic regulation of protein expression in cerebrospinal fluid	2023	Hansson	36504281	EMBO Mol. Med	published	PEA/OLINK	cerebrospinal fluid (CSF) and plasma	398	176	1591	European
Xu_2023	Genome-wide genotype-serum proteome mapping provides insights into the cross-ancestry differences in cardiometabolic disease susceptibility	2023	Xu	36797296	Nat. Comm	published	Mass spectrometry (MS)-based/DIA-NN	serum	304	48	2410	East Asian
Koprulu_2023	Proteogenomic links to human metabolic diseases	2023	Koprulu	36823471	Nature Metabolism	published	PEA/OLINK	plasma	2923	256	1180	European
Sun_2023	Plasma proteomic associations with genetics and health in the UK Biobank	2023	Sun	37794186	Nature	published	PEA/OLINK	plasma	2923	14287	52419	European
Dhindsa_2023	Rare variant associations with plasma protein levels in the UK Biobank	2023	Dhindsa	37794183	Nature	published	PEA/OLINK	plasma	2923	5433	49736	European
Said_2023	Ancestry diversity in the genetic determinants of the human plasma proteome and associated new drug targets	2023	Said	-	-	preprint	PEA/OLINK	plasma	805	1683	3974	East Asian

## Sheet: Table S6
Table S6: Bonferroni significant GGM edge and PPI confience score
pair	label1	label2	uniprot1	uniprot2	pcor	pval	r2	node1_string_id	node2_string_id	neighborhood_on_chromosome	gene_fusion	phylogenetic_cooccurrence	homology	coexpression	experimentally_determined_interaction	database_annotated	automated_textmining	combined_score
CCL3:CCL4	CCL3	CCL4	P10147	P13236	0.790834	9.49282e-93	0.625419	9606.ENSP00000477908	9606.ENSP00000482259	0	0	0.063	0.953	0.921	0.292	0.4	0.943	0.997
EPCAM:CXADR	EPCAM	CXADR	P16422	P78310	0.545234	2.7048e-31	0.29728	.	.	.	.	.	.	.	.	.	.	.
TNFRSF11B:TNFSF11	TNFRSF11B	TNFSF11	O00300	O14788	-0.529524	3.4151e-29	0.280396	9606.ENSP00000297350	9606.ENSP00000381775	0	0	0	0	0.062	0.963	0.9	0.997	0.999
PDGFB:ANGPT1	PDGFB	ANGPT1	P01127	Q15389	0.491489	1.35969e-24	0.241562	9606.ENSP00000330382	9606.ENSP00000428340	0	0	0	0	0	0	0	0.766	0.766
FABP1:LGALS4	FABP1	LGALS4	P07148	P56470	0.406308	2.32958e-16	0.165086	.	.	.	.	.	.	.	.	.	.	.
LY6D:CDSN	LY6D	CDSN	Q14210	Q15517	0.379906	2.75042e-14	0.144328	.	.	.	.	.	.	.	.	.	.	.
CXCL10:CXCL9	CXCL10	CXCL9	P02778	Q07325	0.37	1.46544e-13	0.1369	9606.ENSP00000305651	9606.ENSP00000354901	0	0	0	0.856	0.836	0.994	0.9	0.444	0.999
SCGN:KRT19	SCGN	KRT19	O76038	P08727	0.359518	8.0549e-13	0.129253	.	.	.	.	.	.	.	.	.	.	.
DNPH1:PSMG3	DNPH1	PSMG3	O43598	Q9BT73	0.357203	1.16324e-12	0.127594	.	.	.	.	.	.	.	.	.	.	.
OSM:HGF	OSM	HGF	P13725	P14210	0.353327	2.13657e-12	0.12484	9606.ENSP00000215781	9606.ENSP00000222390	0	0	0	0	0.074	0	0.4	0.774	0.864
TPP1:LGMN	TPP1	LGMN	O14773	Q99538	0.347643	5.12783e-12	0.120856	.	.	.	.	.	.	.	.	.	.	.
FABP1:SULT2A1	FABP1	SULT2A1	P07148	Q06520	0.345888	6.6941e-12	0.119639	9606.ENSP00000295834	9606.ENSP00000222002	0	0	0	0	0.249	0	0.5	0.085	0.626
NCF2:LSP1	NCF2	LSP1	P19878	P33241	0.341949	1.20982e-11	0.116929	.	.	.	.	.	.	.	.	.	.	.
PTPRM:CTRC	PTPRM	CTRC	P28827	Q99895	0.316868	4.27315e-10	0.100406	.	.	.	.	.	.	.	.	.	.	.
CXCL1:CXCL3	CXCL1	CXCL3	P09341	P19876	0.315458	5.16891e-10	0.0995136	9606.ENSP00000379110	9606.ENSP00000296026	0	0	0.051	0.978	0.77	0.61	0.9	0.687	0.996
FCRL2:FCRL3	FCRL2	FCRL3	Q96LA5	Q96P31	0.309145	1.1959e-09	0.0955704	9606.ENSP00000355157	9606.ENSP00000357169	0	0	0.071	0.934	0.43	0	0	0.1	0.482
CXCL8:CXCL6	CXCL8	CXCL6	P10145	P80162	0.30534	1.96284e-09	0.0932323	9606.ENSP00000306512	9606.ENSP00000226317	0	0	0.071	0.824	0.399	0	0.4	0.652	0.868
KRT19:LGALS4	KRT19	LGALS4	P08727	P56470	0.300154	3.81023e-09	0.0900923	.	.	.	.	.	.	.	.	.	.	.
TPP1:SMPDL3A	TPP1	SMPDL3A	O14773	Q92484	0.297734	5.16827e-09	0.0886453	.	.	.	.	.	.	.	.	.	.	.
CD22:CD79B	CD22	CD79B	P20273	P40259	0.297436	5.3645e-09	0.0884683	9606.ENSP00000085219	9606.ENSP00000376544	0	0	0	0	0.481	0	0.5	0.86	0.96
TPP1:CTSO	TPP1	CTSO	O14773	P43234	0.291562	1.10948e-08	0.0850086	.	.	.	.	.	.	.	.	.	.	.
IL1A:IL1B	IL1A	IL1B	P01583	P01584	0.286123	2.14133e-08	0.0818666	9606.ENSP00000263339	9606.ENSP00000263341	0	0	0	0	0.961	0	0.9	0.983	0.999
TNFSF11:TNFSF10	TNFSF11	TNFSF10	O14788	P50591	0.27697	6.26609e-08	0.0767126	9606.ENSP00000381775	9606.ENSP00000241261	0	0	0	0.681	0.049	0	0	0.478	0.482
KLRD1:FCRL6	KLRD1	FCRL6	Q13241	Q6DN72	0.275009	7.84557e-08	0.07563	.	.	.	.	.	.	.	.	.	.	.
TNFRSF13B:TNFSF13	TNFRSF13B	TNFSF13	O14836	O75888	-0.271048	1.22845e-07	0.0734671	9606.ENSP00000261652	9606.ENSP00000343505	0	0	0	0	0	0.292	0.9	0.996	0.999
OMD:ESM1	OMD	ESM1	Q99983	Q9NQ30	0.269543	1.45379e-07	0.0726535	.	.	.	.	.	.	.	.	.	.	.
CST7:OSM	CST7	OSM	O76096	P13725	0.260459	3.92786e-07	0.0678388	.	.	.	.	.	.	.	.	.	.	.
LAMA4:SMOC2	LAMA4	SMOC2	Q16363	Q9H3U7	0.254686	7.24083e-07	0.0648652	.	.	.	.	.	.	.	.	.	.	.

## Sheet: Table S7
Table S7: Summary statistics of protein ratio QTLs
pair	pcor	pval	ID	Chr	bp	REF	ALT	A1	A1_FREQ	N	BETA_ratio	SE_ratio	T_STAT_ratio	P_ratio	min_P	pgain	label1	uniprot1	cis_1	BETA_1	SE_1	T_STAT_1	P_1	uniprot2	label2	cis_2	BETA_2	SE_2	T_STAT_2	P_2
CCL3:CCL4	0.790834	9.49e-93	rs1634520:34436610:A:G	17	34436610	A	G	G	0.363723	1053	0.756461	0.0389374	19.4276	4.79e-72	8.82e-15	1.84e+57	CCL3	P10147	cis	0.334529	0.0425098	7.86945	8.82e-15	P13236	CCL4	cis	-0.0315177	0.0448287	-0.703069	0.482168
CXCL10:CXCL9	0.37	1.47e-13	rs10337:76922759:G:A	4	76922759	G	A	A	0.447968	1009	-0.324556	0.042927	-7.56065	9.03e-14	0.00196144	21724356390	CXCL10	P02778	cis	-0.134965	0.0434785	-3.10417	0.00196144	Q07325	CXCL9	cis	0.122395	0.0423479	2.89023	0.00393226
CXCL10:CXCL9	0.37	1.47e-13	rs10000436:76939644:T:A	4	76939644	T	A	T	0.5	1012	0.351495	0.042881	8.19699	7.44e-16	0.000223833	300660000000	CXCL10	P02778	cis	0.11875	0.0436717	2.71916	0.00665711	Q07325	CXCL9	cis	-0.157336	0.0424788	-3.70388	0.000223833
CXCL10:CXCL9	0.37	1.47e-13	rs10007919:76951854:C:G	4	76951854	C	G	G	0.456065	1047	0.395047	0.0415085	9.51726	1.19e-20	0.000201248	1.69e+16	CXCL10	P02778	cis	0.154482	0.0424964	3.63519	0.000291311	Q07325	CXCL9	cis	-0.154478	0.0414077	-3.73067	0.000201248
CXCL10:CXCL9	0.37	1.47e-13	rs6816425:76983992:T:C	4	76983992	C	T	T	0.404739	1055	-0.307477	0.042728	-7.19616	1.18e-12	0.00347002	2948165266	CXCL10	P02778	cis	-0.110222	0.0432024	-2.5513	0.0108726	Q07325	CXCL9	cis	0.123288	0.0420874	2.92934	0.00347002
KLRD1:FCRL6	0.275009	7.85e-08	rs6656979	1	159782181	C	A	A	0.243371	1056	0.842336	0.0414531	20.3202	1.09e-77	6.51e-62	5948200000000000	KLRD1	Q13241	trans	0.0655817	0.0478464	1.37067	0.170769	Q6DN72	FCRL6	cis	-0.759699	0.0427851	-17.7561	6.51e-62
FCRL2:FCRL3	0.309145	1.2e-09	rs12745906	1	157658500	G	A	A	0.22964	1056	-0.944	0.0424988	-22.2124	6.29e-90	4.14e-60	6.59e+29	FCRL2	Q96LA5	cis	-0.0743333	0.0508078	-1.46303	0.143757	Q96P31	FCRL3	cis	0.783114	0.0448731	17.4518	4.14e-60
CXCL1:CXCL3	0.315458	5.17e-10	rs3117604	4	74734668	T	C	C	0.497633	1056	0.508606	0.040386	12.5936	5.67e-34	1.01e-21	1774650000000	CXCL1	P09341	cis	0.399831	0.0408374	9.7908	1.01e-21	P19876	CXCL3	cis	0.0060965	0.0421814	0.144531	0.885109
LY6D:CDSN	0.379906	2.75e-14	rs201551705:29470678:C:CA	6	29470678	C	CA	CA	0.102941	1054	-0.461197	0.0689722	-6.68671	3.7e-11	0.308463	8329453890	LY6D	Q14210	trans	-0.0665568	0.0684294	-0.972634	0.330959	Q15517	CDSN	cis	0.071335	0.0700086	1.01895	0.308463
LY6D:CDSN	0.379906	2.75e-14	rs2233959:31081065:T:C	6	31081065	C	T	T	0.429061	1022	0.506882	0.0408172	12.4183	4.54e-33	1.51e-20	3335640000000	LY6D	Q14210	trans	-0.0483421	0.0426073	-1.1346	0.256811	Q15517	CDSN	cis	-0.396827	0.0417948	-9.49466	1.51e-20
LY6D:CDSN	0.379906	2.75e-14	kgp2157912	6	31084787	A	G	G	0.284091	1056	0.685958	0.0436271	15.7232	3.45e-50	4.08e-30	1.18e+20	LY6D	Q14210	trans	-0.0701323	0.0458214	-1.53056	0.126179	Q15517	CDSN	cis	-0.518805	0.044094	-11.7659	4.08e-30
DNPH1:PSMG3	0.357203	1.16e-12	GSA-rs9392465	6	3162378	C	A	A	0.495739	1056	0.336348	0.0404052	8.32437	2.61e-16	2.17e-05	83014291835	DNPH1	O43598	cis	-0.0432842	0.0381319	-1.13512	0.256584	Q9BT73	PSMG3	trans	-0.160949	0.0377294	-4.26588	2.17e-05
DNPH1:PSMG3	0.357203	1.16e-12	rs3211066:3271788:C:G	6	3271788	G	C	C	0.392611	1015	-0.469182	0.0441584	-10.625	4.54e-25	3.23e-05	7.13e+19	DNPH1	O43598	cis	0.00975238	0.0425782	0.229046	0.818879	Q9BT73	PSMG3	trans	0.175227	0.041969	4.17516	3.23e-05

## Sheet: Table S8
Table S8: Details of 841 metabolites in the CAS Cohort
Name	m_id	HMDB	KEGG	PubChem	runmode	Formula	Confidence.level	Class	SuperClass	Common.Name	Weblink	Source
L-Serine	m1	HMDB0000187	C00065		rpneg	C3H7NO3	1	Carboxylic acids and derivatives	Organic acids and derivatives	L-Serine	https://hmdb.ca/metabolites/HMDB0000187
Cysteine-S-sulfate	m2	HMDB0000731	C05824		rpneg	C3H7NO5S2	1	Carboxylic acids and derivatives	Organic acids and derivatives	Cysteine-S-sulfate	https://hmdb.ca/metabolites/HMDB0000731	Exogenous
L-Asparagine	m3	HMDB0000168	C00152		rpneg	C4H8N2O3	1	Carboxylic acids and derivatives	Organic acids and derivatives	L-Asparagine	https://hmdb.ca/metabolites/HMDB0000168
L-Glutamine	m4	HMDB0000641	C00064		rpneg	C5H10N2O3	1	Carboxylic acids and derivatives	Organic acids and derivatives	L-Glutamine	https://hmdb.ca/metabolites/HMDB0000641	Exogenous
L-Valine	m5	HMDB0000883	C00183		rpneg	C5H11NO2	1	Carboxylic acids and derivatives	Organic acids and derivatives	L-Valine	https://hmdb.ca/metabolites/HMDB0000883	Exogenous,Endogenous
Pyroglutamic acid	m6	HMDB0000267	C01879		rpneg	C5H7NO3	1	Carboxylic acids and derivatives	Organic acids and derivatives	Pyroglutamic acid	https://hmdb.ca/metabolites/HMDB0000267	Exogenous
N-Acetyl-L-alanine	m7	HMDB0000766			rpneg	C5H9NO3	2	Carboxylic acids and derivatives	Organic acids and derivatives	N-Acetyl-L-alanine	https://hmdb.ca/metabolites/HMDB0000766	Exogenous,Endogenous
N-Formyl-L-methionine	m8	HMDB0001015	C03145		rpneg	C6H11NO3S	1	Carboxylic acids and derivatives	Organic acids and derivatives	N-Formyl-L-methionine	https://hmdb.ca/metabolites/HMDB0001015	Exogenous,Endogenous
Aminoadipic acid	m9	HMDB0000510	C00956		rpneg	C6H11NO4	2	Carboxylic acids and derivatives	Organic acids and derivatives	Aminoadipic acid	https://hmdb.ca/metabolites/HMDB0000510	Exogenous,Endogenous
L-Leucine	m10	HMDB0000687	C00123		rpneg	C6H13NO2	1	Carboxylic acids and derivatives	Organic acids and derivatives	L-Leucine	https://hmdb.ca/metabolites/HMDB0000687	Exogenous
D-xylo-Form	m11	HMDB0029449			rpneg	C6H13NO3	2	Carboxylic acids and derivatives	Organic acids and derivatives	(2R,3R,4R)-2-Amino-4-hydroxy-3-methylpentanoic acid	https://hmdb.ca/metabolites/HMDB0029449	Exogenous
(R)C(R)S-S-Propylcysteine sulfoxide	m12	HMDB0029442			rpneg	C6H13NO3S	2	Carboxylic acids and derivatives	Organic acids and derivatives	(R)C(R)S-S-Propylcysteine sulfoxide	https://hmdb.ca/metabolites/HMDB0029442	Exogenous,Endogenous
L-Lysine	m13	HMDB0000182	C00047		rpneg	C6H14N2O2	1	Carboxylic acids and derivatives	Organic acids and derivatives	L-Lysine	https://hmdb.ca/metabolites/HMDB0000182	Exogenous
L-Histidine	m14	HMDB0000177	C00135		rpneg	C6H9N3O2	1	Carboxylic acids and derivatives	Organic acids and derivatives	L-Histidine	https://hmdb.ca/metabolites/HMDB0000177	Exogenous
3-Methylcrotonylglycine	m15	HMDB0000459			rpneg	C7H11NO3	2	Carboxylic acids and derivatives	Organic acids and derivatives	3-Methylcrotonylglycine	https://hmdb.ca/metabolites/HMDB0000459	Exogenous,Endogenous
2-Methylbutyrylglycine	m16	HMDB0000339			rpneg	C7H13NO3	2	Carboxylic acids and derivatives	Organic acids and derivatives	2-Methylbutyrylglycine	https://hmdb.ca/metabolites/HMDB0000339	Exogenous,Endogenous
4-Hydroxystachydrine	m17	HMDB0029230			rpneg	C7H13NO3	2	Carboxylic acids and derivatives	Organic acids and derivatives	4-Hydroxystachydrine	https://hmdb.ca/metabolites/HMDB0029230	Exogenous
2-Aminoheptanoate	m18	HMDB0094649			rpneg	C7H15NO2	2	Carboxylic acids and derivatives	Organic acids and derivatives	2-Aminoheptanoate	https://hmdb.ca/metabolites/HMDB0094649
gamma-Glutamylalanine	m19	HMDB0006248	C03740		rpneg	C8H14N2O5	2	Carboxylic acids and derivatives	Organic acids and derivatives	gamma-Glutamylalanine	https://hmdb.ca/metabolites/HMDB0006248
Aspartyl-Threonine	m20	HMDB0028763			rpneg	C8H14N2O6	2	Carboxylic acids and derivatives	Organic acids and derivatives	Aspartyl-Threonine	https://hmdb.ca/metabolites/HMDB0028763	Exogenous
N6-Acetyl-L-lysine	m21	HMDB0000206	C02727		rpneg	C8H16N2O3	2	Carboxylic acids and derivatives	Organic acids and derivatives	N6-Acetyl-L-lysine	https://hmdb.ca/metabolites/HMDB0000206
DL-2-Aminooctanoic acid	m22	HMDB0000991			rpneg	C8H17NO2	1	Carboxylic acids and derivatives	Organic acids and derivatives	DL-2-Aminooctanoic acid	https://hmdb.ca/metabolites/HMDB0000991	Exogenous,Endogenous
L-Phenylalanine	m23	HMDB0000159	C00079		rpneg	C9H11NO2	1	Carboxylic acids and derivatives	Organic acids and derivatives	L-Phenylalanine	https://hmdb.ca/metabolites/HMDB0000159	Exogenous
L-Tyrosine	m24	HMDB0000158	C00082		rpneg	C9H11NO3	1	Carboxylic acids and derivatives	Organic acids and derivatives	L-Tyrosine	https://hmdb.ca/metabolites/HMDB0000158
Aspartyl-Glutamate	m25	HMDB0028752			rpneg	C9H14N2O7	2	Carboxylic acids and derivatives	Organic acids and derivatives	Aspartyl-Glutamate	https://hmdb.ca/metabolites/HMDB0028752
Glutamylthreonine	m26	HMDB0028829			rpneg	C9H16N2O6	2	Carboxylic acids and derivatives	Organic acids and derivatives	Glutamylthreonine	https://hmdb.ca/metabolites/HMDB0028829	Exogenous
Phenylacetylglycine	m27	HMDB0000821	C05598		rpneg	C10H11NO3	2	Carboxylic acids and derivatives	Organic acids and derivatives	Phenylacetylglycine	https://hmdb.ca/metabolites/HMDB0000821	Exogenous,Endogenous
Nicotianine	m28	HMDB0029397			rpneg	C10H12N2O4	2	Carboxylic acids and derivatives	Organic acids and derivatives	L-Nicotianine	https://hmdb.ca/metabolites/HMDB0029397	Exogenous,Endogenous
3-Methoxytyrosine	m29	HMDB0001434			rpneg	C10H13NO4	2	Carboxylic acids and derivatives	Organic acids and derivatives	3-Methoxytyrosine	https://hmdb.ca/metabolites/HMDB0001434
Histidylthreonine	m30	HMDB0028895			rpneg	C10H16N4O4	2	Carboxylic acids and derivatives	Organic acids and derivatives	Histidylthreonine	https://hmdb.ca/metabolites/HMDB0028895	Exogenous
4-(4'-Methyl[2,2'-bipyridin]-4-yl)butanoic acid	m31			METLIN 714187	rpneg	C10H16N4O4	2	Carboxylic acids and derivatives	Organic acids and derivatives	4-(4'-Methyl[2,2'-bipyridin]-4-yl)butanoic acid
N2-gamma-Glutamylglutamine	m32	HMDB0011738	C05283		rpneg	C10H17N3O6	1	Carboxylic acids and derivatives	Organic acids and derivatives	N2-gamma-Glutamylglutamine	https://hmdb.ca/metabolites/HMDB0011738
Leucyl-Aspartate	m33	HMDB0028925			rpneg	C10H18N2O5	2	Carboxylic acids and derivatives	Organic acids and derivatives	Leucyl-Aspartate	https://hmdb.ca/metabolites/HMDB0028925	Exogenous
gamma-Glutamylmethionine	m34	HMDB0034367			rpneg	C10H18N2O5S	2	Carboxylic acids and derivatives	Organic acids and derivatives	gamma-Glutamylmethionine	https://hmdb.ca/metabolites/HMDB0034367	Exogenous
Capryloylglycine	m35	HMDB0000832			rpneg	C10H19NO3	2	Carboxylic acids and derivatives	Organic acids and derivatives	Capryloylglycine	https://hmdb.ca/metabolites/HMDB0000832
L-Tryptophan	m36	HMDB0000929	C00078		rpneg	C11H12N2O2	1	Indoles and derivatives	Organoheterocyclic compounds	L-Tryptophan	https://hmdb.ca/metabolites/HMDB0000929	Exogenous,Endogenous
Beta-Citryl-L-glutamic acid	m37	HMDB0013220			rpneg	C11H15NO10	2	Carboxylic acids and derivatives	Organic acids and derivatives	Beta-Citryl-L-glutamic acid	https://hmdb.ca/metabolites/HMDB0013220	Endogenous
N-Acetylaspartylglutamic acid	m38	HMDB0001067	C12270		rpneg	C11H16N2O8	2	Carboxylic acids and derivatives	Organic acids and derivatives	N-Acetylaspartylglutamic acid	https://hmdb.ca/metabolites/HMDB0001067	Exogenous,Endogenous
gamma-Glutamylleucine	m39	HMDB0011171			rpneg	C11H20N2O5	2	Carboxylic acids and derivatives	Organic acids and derivatives	gamma-Glutamylleucine	https://hmdb.ca/metabolites/HMDB0011171	Exogenous
gamma-Glutamylisoleucine	m40	HMDB0011170			rpneg	C11H20N2O5	2	Carboxylic acids and derivatives	Organic acids and derivatives	gamma-Glutamylisoleucine	https://hmdb.ca/metabolites/HMDB0011170
N-lactoyl-Phenylalanine	m41	HMDB0062175			rpneg	C12H15NO4	2	Carboxylic acids and derivatives	Organic acids and derivatives	N-Lactoylphenylalanine	https://hmdb.ca/metabolites/HMDB0062175
Tyrosyl-Alanine	m42	HMDB0029098			rpneg	C12H16N2O4	2	Carboxylic acids and derivatives	Organic acids and derivatives	Tyrosyl-Alanine	https://hmdb.ca/metabolites/HMDB0029098
Hypoglycin B	m43	HMDB0029428	C08280		rpneg	C12H18N2O5	2	Carboxylic acids and derivatives	Organic acids and derivatives	Hypoglycin B	https://hmdb.ca/metabolites/HMDB0029428	Exogenous,Endogenous
Isomer of hypoglycin B	m44				rpneg	C12H18N2O5	3	Carboxylic acids and derivatives	Organic acids and derivatives	Isomer of hypoglycin B
Indolylacryloylglycine	m45	HMDB0006005			rpneg	C13H12N2O3	2	Carboxylic acids and derivatives	Organic acids and derivatives	Indolylacryloylglycine	https://hmdb.ca/metabolites/HMDB0006005	Exogenous,Endogenous
Phenylalanylaspartic acid	m46	HMDB0028991			rpneg	C13H16N2O5	2	Carboxylic acids and derivatives	Organic acids and derivatives	Phenylalanylaspartic acid	https://hmdb.ca/metabolites/HMDB0028991	Exogenous
4-Methylmannonic phenylhydrazide	m47			PubChem 345720	rpneg	C13H20N2O6	2	Amino acids	Organic acids and derivatives	2,3,5,6-tetrahydroxy-4-methoxy-N'-phenylhexanehydrazide	https://pubchem.ncbi.nlm.nih.gov/compound/345720
N-Acetyl-L-leucyl-L-proline	m48			PubChem 54571554	rpneg	C13H22N2O4	2	Amino acids	Organic acids and derivatives	N-Acetyl-L-leucyl-L-proline	https://pubchem.ncbi.nlm.nih.gov/compound/54571554
Cysteineglutathione disulfide	m49	HMDB0000656			rpneg	C13H22N4O8S2	2	Carboxylic acids and derivatives	Organic acids and derivatives	Cysteineglutathione disulfide	https://hmdb.ca/metabolites/HMDB0000656	Exogenous,Endogenous
Tyrosyl-Glutamate	m50	HMDB0029104			rpneg	C14H18N2O6	2	Carboxylic acids and derivatives	Organic acids and derivatives	Tyrosyl-Glutamate	https://hmdb.ca/metabolites/HMDB0029104	Exogenous
Imazamethabenz	m51	HMDB0034885			rpneg	C15H18N2O3	2	Carboxylic acids and derivatives	Organic acids and derivatives	Imazamethabenz	https://hmdb.ca/metabolites/HMDB0034885	Exogenous
Isomer 1 of imazamethabenz	m52				rpneg	C15H18N2O3	3	Carboxylic acids and derivatives	Organic acids and derivatives	Isomer 1 of imazamethabenz
Isomer 2 of imazamethabenz	m53				rpneg	C15H18N2O3	3	Carboxylic acids and derivatives	Organic acids and derivatives	Isomer 2 of imazamethabenz
2-[2-(1,3-Dioxo-1,3-dihydro-isoindol-2-yl)-acetylamino]-4-methyl-pentanoic acid	m54			PubChem 4069818	rpneg	C16H18N2O5	2	Amino acids	Organic acids and derivatives	2-[2-(1,3-Dioxo-1,3-dihydro-isoindol-2-yl)-acetylamino]-4-methyl-pentanoic acid	https://pubchem.ncbi.nlm.nih.gov/substance/4069818
Indolebutyroyl aspartic acid	m55			PubChem 7097261	rpneg	C16H18N2O5	2	Amino acids	Organic acids and derivatives	Indolebutyroyl aspartic acid	https://pubchem.ncbi.nlm.nih.gov/compound/7097261
Phenylalanylphenylalanine	m56	HMDB0013302			rpneg	C18H20N2O3	1	Carboxylic acids and derivatives	Organic acids and derivatives	Phenylalanylphenylalanine	https://hmdb.ca/metabolites/HMDB0013302	Endogenous
Dityrosine	m57	HMDB0006045			rpneg	C18H20N2O6	2	Amino acids	Organic acids and derivatives	Dityrosine	https://hmdb.ca/metabolites/HMDB0006045	Exogenous,Endogenous
Arg Ser Phe	m58			METLIN 15959	rpneg	C18H28N6O5	2	Amino acids	Organic acids and derivatives	Arg Ser Phe
Oxidized glutathione	m59	HMDB0003337	C00127		rpneg	C20H32N6O12S2	1	Carboxylic acids and derivatives	Organic acids and derivatives	Oxidized glutathione	https://hmdb.ca/metabolites/HMDB0003337	Exogenous
Nocardicin C	m60			PubChem 3042313	rpneg	C23H26N4O8	2	Amino acids	Organic acids and derivatives	Nocardicin C	https://pubchem.ncbi.nlm.nih.gov/compound/3042313
Valsartan	m61	HMDB0014323			rpneg	C24H29N5O3	1	Carboxylic acids and derivatives	Organic acids and derivatives	Valsartan	https://hmdb.ca/metabolites/HMDB0014323
Glu Lys Tyr Ser Asn	m62			METLIN 264242	rpneg	C27H41N7O11	2	Amino acids	Organic acids and derivatives	Glu Lys Tyr Ser Asn
Pro Tyr Tyr Val	m63			METLIN 207476	rpneg	C28H36N4O7	2	Amino acids	Organic acids and derivatives	Pro Tyr Tyr Val
Thr Leu Phe Tyr	m64			METLIN 235178	rpneg	C28H38N4O7	2	Amino acids	Organic acids and derivatives	Thr Leu Phe Tyr
Thr Leu Tyr Phe	m65			METLIN 235463	rpneg	C28H38N4O7	2	Amino acids	Organic acids and derivatives	Thr Leu Tyr Phe
Benzenebutanoic acid	m66	HMDB0000543	C21793		rpneg	C10H12O2	2	Benzene and substituted derivatives	Benzenoids	Benzenebutanoic acid	https://hmdb.ca/metabolites/HMDB0000543	Exogenous,Endogenous
Homoveratric acid	m67	HMDB0000434			rpneg	C10H12O4	2	Benzene and substituted derivatives	Benzenoids	Homoveratric acid	https://hmdb.ca/metabolites/HMDB0000434	Exogenous,Endogenous
Benzoic acid	m68	HMDB0001870	C00539		rpneg	C7H6O2	1	Benzene and substituted derivatives	Benzenoids	Benzoic acid	https://hmdb.ca/metabolites/HMDB0001870	Exogenous,Endogenous
4-Hydroxybenzaldehyde	m69	HMDB0011718	C00633		rpneg	C7H6O2	2	Organooxygen compounds	Organic oxygen compounds	4-Hydroxybenzaldehyde	https://hmdb.ca/metabolites/HMDB0011718	Exogenous,Endogenous
3,4-Dihydroxybenzaldehyde	m70	HMDB0059965	C16700		rpneg	C7H6O3	1	Organooxygen compounds	Organic oxygen compounds	3,4-Dihydroxybenzaldehyde	https://hmdb.ca/metabolites/HMDB0059965	Exogenous
4-Hydroxybenzoic acid	m71	HMDB0000500	C00156		rpneg	C7H6O3	1	Benzene and substituted derivatives	Benzenoids	4-Hydroxybenzoic acid	https://hmdb.ca/metabolites/HMDB0000500	Endogenous,Exogenous
3-Hydroxybenzoic acid	m72	HMDB0002466	C00587		rpneg	C7H6O3	1	Benzene and substituted derivatives	Benzenoids	3-Hydroxybenzoic acid	https://hmdb.ca/metabolites/HMDB0002466	Exogenous,Endogenous
Salicylic acid	m73	HMDB0001895	C00805		rpneg	C7H6O3	1	Benzene and substituted derivatives	Benzenoids	Salicylic acid	https://hmdb.ca/metabolites/HMDB0001895
2,6-Dihydroxybenzoic acid	m74	HMDB0013676			rpneg	C7H6O4	2	Benzene and substituted derivatives	Benzenoids	2,6-Dihydroxybenzoic acid	https://hmdb.ca/metabolites/HMDB0013676	Exogenous
Gentisic acid	m75	HMDB0000152	C00628		rpneg	C7H6O4	1	Benzene and substituted derivatives	Benzenoids	2,5-Dihydroxybenzoic acid MM	https://hmdb.ca/metabolites/HMDB0000152	Endogenous,Exogenous
2,4-dihydroxy-3-methoxybenzoic acid	m76			PubChem 3021603	rpneg	C8H8O5	2	Benzoic acids and derivatives	Benzenoids	2,4-dihydroxy-3-methoxybenzoic acid	https://pubchem.ncbi.nlm.nih.gov/compound/3021603
4-methoxygentisic acid	m77			PubChem 14191786	rpneg	C8H8O5	2	Benzoic acids and derivatives	Benzenoids	2,5-dihydroxy-4-methoxybenzoic acid	https://pubchem.ncbi.nlm.nih.gov/compound/14191786
Syringic acid	m78	HMDB0002085	C10833		rpneg	C9H10O5	1	Benzene and substituted derivatives	Benzenoids	Syringic acid	https://hmdb.ca/metabolites/HMDB0002085	Exogenous,Endogenous
3-Hydroxy-4-methoxymandelate	m79	HMDB0029170			rpneg	C9H10O5	2	Phenols	Benzenoids	3-Hydroxy-4-methoxymandelate	https://hmdb.ca/metabolites/HMDB0029170
Epinephrine	m80	HMDB0000068	C00788		rpneg	C9H13NO3	1	Phenols	Benzenoids	Epinephrine	https://hmdb.ca/metabolites/HMDB0000068	Exogenous,Endogenous
Hippuric acid	m81	HMDB0000714	C01586		rpneg	C9H9NO3	1	Benzene and substituted derivatives	Benzenoids	Hippuric acid	https://hmdb.ca/metabolites/HMDB0000714	Exogenous,Endogenous
3-Hydroxyhippuric acid	m82	HMDB0006116			rpneg	C9H9NO4	1	Benzene and substituted derivatives	Benzenoids	3-Hydroxyhippuric acid	https://hmdb.ca/metabolites/HMDB0006116	Exogenous,Endogenous
2-(pyridin-2-ylamino)benzoic acid	m83			PubChem 3117160	rpneg	C12H10N2O2	2	Benzoic acids and derivatives	Benzenoids	2-(pyridin-2-ylamino)benzoic acid	https://pubchem.ncbi.nlm.nih.gov/compound/3117160
2-[(3-Ethylpiperazin-1-yl)methyl]benzoic acid	m84			PubChem 44828710	rpneg	C14H20N2O2	2	Benzoic acids and derivatives	Benzenoids	2-[(3-Ethylpiperazin-1-yl)methyl]benzoic acid	https://pubchem.ncbi.nlm.nih.gov/compound/44828710
12a-Hydroxy-3-oxocholadienate	m85	HMDB0000385			rpneg	C24H34O4	2	Steroids and steroid derivatives	Lipids and lipid-like molecules	12a-Hydroxy-3-oxocholadienic acid	https://hmdb.ca/metabolites/HMDB0000385	Exogenous,Endogenous
7-Ketolithocholate	m86	HMDB0000467			rpneg	C24H38O4	1	Steroids and steroid derivatives	Lipids and lipid-like molecules	Nutriacholic acid	https://hmdb.ca/metabolites/HMDB0000467	Endogenous,Exogenous
7-Ketodeoxycholic acid	m87	HMDB0000391			rpneg	C24H38O5	1	Steroids and steroid derivatives	Lipids and lipid-like molecules	7-Ketodeoxycholic acid	https://hmdb.ca/metabolites/HMDB0000391	Exogenous,Endogenous
3-Oxocholic acid	m88	HMDB0000502			rpneg	C24H38O5	1	Steroids and steroid derivatives	Lipids and lipid-like molecules	3-Oxocholic acid	https://hmdb.ca/metabolites/HMDB0000502	Exogenous
Chenodeoxycholic acid	m89	HMDB0000518	C02528		rpneg	C24H40O4	1	Steroids and steroid derivatives	Lipids and lipid-like molecules	Chenodeoxycholic acid	https://hmdb.ca/metabolites/HMDB0000518	Exogenous,Endogenous
Deoxycholic acid	m90	HMDB0000626	C04483		rpneg	C24H40O4	1	Steroids and steroid derivatives	Lipids and lipid-like molecules	Deoxycholic acid	https://hmdb.ca/metabolites/HMDB0000626	Exogenous
Ursodeoxycholic acid	m91	HMDB0000946	C07880		rpneg	C24H40O4	1	Steroids and steroid derivatives	Lipids and lipid-like molecules	Ursodeoxycholic acid	https://hmdb.ca/metabolites/HMDB0000946	Exogenous
Isohyodeoxycholic acid	m92	HMDB0000664			rpneg	C24H40O4	1	Steroids and steroid derivatives	Lipids and lipid-like molecules	Isohyodeoxycholic acid	https://hmdb.ca/metabolites/HMDB0000664	Exogenous,Endogenous
Ursocholic acid	m93	HMDB0000917	C17644		rpneg	C24H40O5	1	Steroids and steroid derivatives	Lipids and lipid-like molecules	Ursocholic acid	https://hmdb.ca/metabolites/HMDB0000917	Exogenous,Endogenous
Isocholic acid	m94	HMDB0000419			rpneg	C24H40O5	1	Glycerolipids	Lipids and lipid-like molecules	3b,7a,12a-Trihydroxy-5b-cholanoic acid	https://hmdb.ca/metabolites/HMDB0000419	Exogenous,Endogenous
Muricholic acid	m95	HMDB0000865			rpneg	C24H40O5	1	Steroids and steroid derivatives	Lipids and lipid-like molecules	Muricholic acid	https://hmdb.ca/metabolites/HMDB0000865	Exogenous
Cholic acid	m96	HMDB0000619	C00695		rpneg	C24H40O5	1	Steroids and steroid derivatives	Lipids and lipid-like molecules	Cholic acid	https://hmdb.ca/metabolites/HMDB0000619	Exogenous
3b,4b,7a,12a-Tetrahydroxy-5b-cholanoate	m97	HMDB0000311			rpneg	C24H40O6	2	Steroids and steroid derivatives	Lipids and lipid-like molecules	3b,4b,7a,12a-Tetrahydroxy-5b-cholanoic acid	https://hmdb.ca/metabolites/HMDB0000311
Glycolithocholate	m98	HMDB0000698	C15557		rpneg	C26H43NO4	1	Steroids and steroid derivatives	Lipids and lipid-like molecules	Lithocholic acid glycine conjugate	https://hmdb.ca/metabolites/HMDB0000698	Exogenous
Glycoursodeoxycholic acid	m99	HMDB0000708			rpneg	C26H43NO5	1	Steroids and steroid derivatives	Lipids and lipid-like molecules	Glycoursodeoxycholic acid	https://hmdb.ca/metabolites/HMDB0000708	Exogenous,Endogenous
Chenodeoxycholylglycine	m100	HMDB0000637	C05466		rpneg	C26H43NO5	1	Steroids and steroid derivatives	Lipids and lipid-like molecules	Chenodeoxycholic acid glycine conjugate	https://hmdb.ca/metabolites/HMDB0000637	Exogenous,Endogenous
Glycohyocholic acid	m101	HMDB0240607			rpneg	C26H43NO6	1	Steroids and steroid derivatives	Lipids and lipid-like molecules	Glycohyocholic acid	https://hmdb.ca/metabolites/HMDB0240607
Glycocholic acid	m102	HMDB0000138	C01921		rpneg	C26H43NO6	1	Steroids and steroid derivatives	Lipids and lipid-like molecules	Glycocholic acid	https://hmdb.ca/metabolites/HMDB0000138	Exogenous,Endogenous
Lithocholyltaurine	m103	HMDB0000722	C02592		rpneg	C26H45NO5S	1	Steroids and steroid derivatives	Lipids and lipid-like molecules	Lithocholyltaurine	https://hmdb.ca/metabolites/HMDB0000722
Tauroursodeoxycholic acid	m104	HMDB0000874			rpneg	C26H45NO6S	1	Steroids and steroid derivatives	Lipids and lipid-like molecules	Tauroursodeoxycholic acid	https://hmdb.ca/metabolites/HMDB0000874	Exogenous,Endogenous
Taurochenodesoxycholic acid	m105	HMDB0000951	C05465		rpneg	C26H45NO6S	1	Steroids and steroid derivatives	Lipids and lipid-like molecules	Taurochenodesoxycholic acid	https://hmdb.ca/metabolites/HMDB0000951	Exogenous,Endogenous
Taurodeoxycholic acid	m106	HMDB0000896	C05463		rpneg	C26H45NO6S	1	Steroids and steroid derivatives	Lipids and lipid-like molecules	Taurodeoxycholic acid	https://hmdb.ca/metabolites/HMDB0000896	Exogenous,Endogenous
Taurocholic acid	m107	HMDB0000036	C05122		rpneg	C26H45NO7S	1	Steroids and steroid derivatives	Lipids and lipid-like molecules	Taurocholic acid	https://hmdb.ca/metabolites/HMDB0000036
27-Norcholestanehexol	m108	HMDB0002157			rpneg	C26H46O6	2	Steroids and steroid derivatives	Lipids and lipid-like molecules	27-Norcholestanehexol	https://hmdb.ca/metabolites/HMDB0002157	Exogenous,Endogenous
Bilirubin	m109	HMDB0000054	C00486		rpneg	C33H36N4O6	2	Tetrapyrroles and derivatives	Organoheterocyclic compounds	Bilirubin	https://hmdb.ca/metabolites/HMDB0000054	Exogenous,Endogenous
Threonic Acid	m110	HMDB0000943	C01620		rpneg	C4H8O5	1	Organooxygen compounds	Organic oxygen compounds	Threonic acid	https://hmdb.ca/metabolites/HMDB0000943	Exogenous,Endogenous
Arabinonic acid	m111	HMDB0000539	C00878		rpneg	C5H10O6	2	Organooxygen compounds	Organic oxygen compounds	Arabinonic acid	https://hmdb.ca/metabolites/HMDB0000539	Exogenous,Endogenous
Glucuronic acid/Galaturonic acid	m112	HMDB0000127	C00191		rpneg	C6H10O7	1	Organooxygen compounds	Organic oxygen compounds	D-Glucuronic acid	https://hmdb.ca/metabolites/HMDB0000127	Exogenous
Glucose/Galactose/Fructose/Mannose	m113	HMDB0000122	C00221		rpneg	C6H12O6	1	Organooxygen compounds	Organic oxygen compounds	D-Glucose	https://hmdb.ca/metabolites/HMDB0000122	Exogenous,Endogenous
Gluconic acid	m114	HMDB0000625	C00257		rpneg	C6H12O7	1	Organooxygen compounds	Organic oxygen compounds	Gluconic acid	https://hmdb.ca/metabolites/HMDB0000625	Exogenous,Endogenous
Glucosamine 6-sulfate	m115	HMDB0000592	C04132		rpneg	C6H13NO8S	2	Organooxygen compounds	Organic oxygen compounds	Glucosamine 6-sulfate	https://hmdb.ca/metabolites/HMDB0000592
5,6-Dihydrouridine	m116	HMDB0000497			rpneg	C9H14N2O6	2	Organooxygen compounds	Organic oxygen compounds	5,6-Dihydrouridine	https://hmdb.ca/metabolites/HMDB0000497	Exogenous,Endogenous
N-Acetylmuramate	m117	HMDB0060493	C02713		rpneg	C11H19NO8	2	Organooxygen compounds	Organic oxygen compounds	N-Acetylmuramate	https://hmdb.ca/metabolites/HMDB0060493
N-Acetylneuraminic acid	m118	HMDB0000230	C19910		rpneg	C11H19NO9	2	Organooxygen compounds	Organic oxygen compounds	N-Acetylneuraminic acid	https://hmdb.ca/metabolites/HMDB0000230
p-Cresol glucuronide	m119	HMDB0011686			rpneg	C13H16O7	2	Organooxygen compounds	Organic oxygen compounds	p-Cresol glucuronide	https://hmdb.ca/metabolites/HMDB0011686	Exogenous,Endogenous
Acetaminophen glucuronide	m120	HMDB0010316			rpneg	C14H17NO8	2	Organooxygen compounds	Organic oxygen compounds	Acetaminophen glucuronide	https://hmdb.ca/metabolites/HMDB0010316	Exogenous,Endogenous
2-Phenylethyl b-D-glucopyranoside	m121	HMDB0029819			rpneg	C14H20O6	2	Organooxygen compounds	Organic oxygen compounds	2-Phenylethyl beta-D-glucopyranoside	https://hmdb.ca/metabolites/HMDB0029819
Isopropyl apiosylglucoside	m122	HMDB0041513			rpneg	C14H26O10	2	Organooxygen compounds	Organic oxygen compounds	Isopropyl apiosylglucoside	https://hmdb.ca/metabolites/HMDB0041513	Exogenous,Endogenous
2,8-Dihydroxyquinoline-b-D-glucuronide	m123	HMDB0011658			rpneg	C15H15NO8	2	Organooxygen compounds	Organic oxygen compounds	2,8-Dihydroxyquinoline-beta-D-glucuronide	https://hmdb.ca/metabolites/HMDB0011658	Exogenous,Endogenous
MHPG Glucuronide	m124	HMDB0000496			rpneg	C15H20O10	2	Organooxygen compounds	Organic oxygen compounds	3-Methoxy-4-hydroxyphenylglycol glucuronide	https://hmdb.ca/metabolites/HMDB0000496	Exogenous,Endogenous
7-Hydroxyterpineol 8-glucoside	m125	HMDB0033019			rpneg	C16H28O7	2	Organooxygen compounds	Organic oxygen compounds	7-Hydroxyterpineol 8-glucoside	https://hmdb.ca/metabolites/HMDB0033019	Exogenous,Endogenous
Humulinic acid A	m126	HMDB0030104			rpneg	C15H22O4	2	Vinylogous acids	Organic acids and derivatives	Humulinic acid A	https://hmdb.ca/metabolites/HMDB0030104	Exogenous
Fumaric acid	m127	HMDB0000134	C00122		rpneg	C4H4O4	1	Carboxylic acids and derivatives	Organic acids and derivatives	Fumaric acid	https://hmdb.ca/metabolites/HMDB0000134	Exogenous,Endogenous
Methylmalonic acid	m128	HMDB0000202	C02170		rpneg	C4H6O4	1	Carboxylic acids and derivatives	Organic acids and derivatives	Methylmalonic acid	https://hmdb.ca/metabolites/HMDB0000202	Exogenous,Endogenous
Succinic acid	m129	HMDB0000254	C00042		rpneg	C4H6O4	1	Carboxylic acids and derivatives	Organic acids and derivatives	Succinic acid	https://hmdb.ca/metabolites/HMDB0000254	Exogenous,Endogenous
Glutaric acid	m130	HMDB0000661	C00489		rpneg	C5H8O4	1	Carboxylic acids and derivatives	Organic acids and derivatives	Glutaric acid	https://hmdb.ca/metabolites/HMDB0000661	Exogenous,Endogenous
Monoethyl malonic acid	m131	HMDB0000576			rpneg	C5H8O4	2	Carboxylic acids and derivatives	Organic acids and derivatives	Monoethyl malonic acid	https://hmdb.ca/metabolites/HMDB0000576	Exogenous,Endogenous
Methylsuccinic acid	m132	HMDB0001844			rpneg	C5H8O4	1	Fatty Acyls	Lipids and lipid-like molecules	Methylsuccinic acid	https://hmdb.ca/metabolites/HMDB0001844	Exogenous,Endogenous
2-Hydroxyglutarate	m133	HMDB0059655	C02630		rpneg	C5H8O5	2	Hydroxy acids and derivatives	Organic acids and derivatives	2-Hydroxyglutarate	https://hmdb.ca/metabolites/HMDB0059655	Exogenous
3,3'-Thiobispropanoic acid	m134	HMDB0031162			rpneg	C6H10O4S	2	Carboxylic acids and derivatives	Organic acids and derivatives	3,3'-Thiobispropanoic acid	https://hmdb.ca/metabolites/HMDB0031162	Exogenous,Endogenous
cis-Aconitic acid	m135	HMDB0000072	C00417		rpneg	C6H6O6	1	Carboxylic acids and derivatives	Organic acids and derivatives	cis-Aconitic acid	https://hmdb.ca/metabolites/HMDB0000072	Exogenous
Citric acid	m136	HMDB0000094	C00158		rpneg	C6H8O7	1	Carboxylic acids and derivatives	Organic acids and derivatives	Citric acid	https://hmdb.ca/metabolites/HMDB0000094
Isocitric acid	m137	HMDB0000193	C00311		rpneg	C6H8O7	1	Carboxylic acids and derivatives	Organic acids and derivatives	Isocitric acid	https://hmdb.ca/metabolites/HMDB0000193	Exogenous,Endogenous
2-Methylcitric acid	m138	HMDB0000379			rpneg	C7H10O7	2	Carboxylic acids and derivatives	Organic acids and derivatives	2-Methylcitric acid	https://hmdb.ca/metabolites/HMDB0000379
Hydrocinnamic acid	m139	HMDB0000764	C05629		rpneg	C9H10O2	1	Phenylpropanoic acids	Phenylpropanoids and polyketides	Hydrocinnamic acid	https://hmdb.ca/metabolites/HMDB0000764	Exogenous,Endogenous
D-Phenyllactic acid	m140	HMDB0000563	C05607		rpneg	C9H10O3	1	Phenylpropanoic acids	Phenylpropanoids and polyketides	D-Phenyllactic acid	https://hmdb.ca/metabolites/HMDB0000563	Exogenous
Hydroxyphenyllactic acid	m141	HMDB0000755	C03672		rpneg	C9H10O4	1	Phenylpropanoic acids	Phenylpropanoids and polyketides	Hydroxyphenyllactic acid	https://hmdb.ca/metabolites/HMDB0000755	Exogenous,Endogenous
3-Hydroxyphenyllactate	m142	HMDB0029232			rpneg	C9H10O4	2	Phenylpropanoic acids	Phenylpropanoids and polyketides	3-Hydroxyphenyllactate	https://hmdb.ca/metabolites/HMDB0029232
Cinnamic acid	m143	HMDB0000567	C10438		rpneg	C9H8O2	1	Cinnamic acids and derivatives	Phenylpropanoids and polyketides	Cinnamic acid	https://hmdb.ca/metabolites/HMDB0000567	Exogenous,Endogenous
Phenylpyruvic acid*	m144	HMDB0000205	C00166		rpneg	C9H8O3	1	Benzene and substituted derivatives	Benzenoids	Phenylpyruvic acid	https://hmdb.ca/metabolites/HMDB0000205	Exogenous,Endogenous
4-Hydroxyphenylpyruvic acid*	m145	HMDB0000707	C01179		rpneg	C9H8O4	1	Benzene and substituted derivatives	Benzenoids	4-Hydroxyphenylpyruvic acid	https://hmdb.ca/metabolites/HMDB0000707
Caffeic acid	m146	HMDB0001964	C01481		rpneg	C9H8O4	1	Cinnamic acids and derivatives	Phenylpropanoids and polyketides	Caffeic acid	https://hmdb.ca/metabolites/HMDB0001964	Exogenous,Endogenous
3,4-Dimethoxycinnamic acid	m147	HMDB0034315			rpneg	C11H12O4	1	Cinnamic acids and derivatives	Phenylpropanoids and polyketides	3,4-Dimethoxycinnamic acid	https://pubchem.ncbi.nlm.nih.gov/compound/717531
Glutamic acid glutamate	m148			PubChem 129669930	rpneg	C10H14N2O8	2	Carboxylic acids and derivatives	Organic acids and derivatives	Glutamic acid glutamate	https://pubchem.ncbi.nlm.nih.gov/compound/129669930
Edetic Acid	m149	HMDB0015109	C00284		rpneg	C10H16N2O8	1	Carboxylic acids and derivatives	Organic acids and derivatives	Edetic Acid	https://hmdb.ca/metabolites/HMDB0015109
Kynurenic acid	m150	HMDB0000715	C01717		rpneg	C10H7NO3	1	Quinolines and derivatives	Organoheterocyclic compounds	Kynurenic acid	https://hmdb.ca/metabolites/HMDB0000715	Exogenous,Endogenous
3-Indolehydracrylic acid	m151	HMDB0059765			rpneg	C11H11NO3	2	Indoles and derivatives	Organoheterocyclic compounds	3-Indolehydracrylic acid	https://hmdb.ca/metabolites/HMDB0059765
4-(Butan-2-yl)cyclohexane-1-carboxylic acid	m152			PubChem 13867662	rpneg	C11H20O2	2	Carboxylic acids and derivatives	Organic acids and derivatives	4-(Butan-2-yl)cyclohexane-1-carboxylic acid	https://pubchem.ncbi.nlm.nih.gov/compound/13867662
Quinol glucuronide	m153	HMDB0259508			rpneg	C12H14O8	2	Organooxygen compounds	Organic oxygen compounds	Quinol glucuronide	https://hmdb.ca/metabolites/HMDB0259508
3-(2,3,4-trimethoxyphenyl)propanoic acid	m154			PubChem 118401	rpneg	C12H16O5	2	Carboxylic acids and derivatives	Organic acids and derivatives	3-(2,3,4-trimethoxyphenyl)propanoic acid	https://pubchem.ncbi.nlm.nih.gov/compound/118401
N-Lauroylglycine	m155	HMDB0013272			rpneg	C14H27NO3	2	Carboxylic acids and derivatives	Organic acids and derivatives	N-Lauroylglycine	https://hmdb.ca/metabolites/HMDB0013272	Endogenous
Leucyl-phenylalanine	m156	HMDB0013243			rpneg	C15H22N2O3	1	Carboxylic acids and derivatives	Organic acids and derivatives	Leucylphenylalanine	https://hmdb.ca/metabolites/HMDB0013243	Exogenous
2-[4-(furan-2-carbonyl)piperazine-1-carbonyl]-cyclohex-1-enecarboxylic acid	m157			PubChem 647918	rpneg	C17H20N2O5	2	Carboxylic acids and derivatives	Organic acids and derivatives	2-[4-(furan-2-carbonyl)piperazine-1-carbonyl]-cyclohex-1-enecarboxylic acid	https://pubchem.ncbi.nlm.nih.gov/compound/647918
Tryptophan 2-C-mannoside	m158	HMDB0240296			rpneg	C17H22N2O7	2	Indoles and derivatives	Organoheterocyclic compounds	Tryptophan 2-C-mannoside	https://hmdb.ca/metabolites/HMDB0240296
1-O-Cinnamoyl-b-D-gentiobiose	m159	HMDB0030295			rpneg	C21H28O12	2	Cinnamic acids and derivatives	Phenylpropanoids and polyketides	1-O-Cinnamoyl-beta-D-gentiobiose	https://hmdb.ca/metabolites/HMDB0030295	Exogenous,Endogenous
Butyric acid	m160	HMDB0000039	C00246		rpneg	C4H8O2	2	Fatty Acyls	Lipids and lipid-like molecules	Butyric acid	https://hmdb.ca/metabolites/HMDB0000039	Exogenous
2-Ethylhydracrylic acid	m161	HMDB0000396			rpneg	C5H10O3	1	Fatty Acyls	Lipids and lipid-like molecules	2-Ethylhydracrylic acid	https://hmdb.ca/metabolites/HMDB0000396	Exogenous,Endogenous
2-Hydroxy-2-methylbutyric acid	m162	HMDB0001987			rpneg	C5H10O3	1	Fatty Acyls	Lipids and lipid-like molecules	2-Hydroxy-2-methylbutyric acid	https://hmdb.ca/metabolites/HMDB0001987	Exogenous,Endogenous
3-Hydroxyisovaleric acid	m163	HMDB0000754			rpneg	C5H10O3	1	Fatty Acyls	Lipids and lipid-like molecules	3-Hydroxyisovaleric acid	https://hmdb.ca/metabolites/HMDB0000754	Exogenous,Endogenous
3-Hydroxyvaleric acid	m164	HMDB0000531			rpneg	C5H10O3	1	Fatty Acyls	Lipids and lipid-like molecules	3-Hydroxyvaleric acid	https://hmdb.ca/metabolites/HMDB0000531	Exogenous,Endogenous
2,3-Dihydroxyvaleric acid	m165	HMDB0000421			rpneg	C5H10O4	2	Fatty Acyls	Lipids and lipid-like molecules	2,3-Dihydroxyvaleric acid	https://hmdb.ca/metabolites/HMDB0000421	Exogenous,Endogenous
2-Hydroxyadipic acid	m166	HMDB0000321	C02360		rpneg	C6H10O5	2	Fatty Acyls	Lipids and lipid-like molecules	2-Hydroxyadipic acid	https://hmdb.ca/metabolites/HMDB0000321	Exogenous,Endogenous
3-Hydroxyadipic acid	m167	HMDB0000345			rpneg	C6H10O5	2	Hydroxy acids and derivatives	Organic acids and derivatives	3-Hydroxyadipic acid	https://hmdb.ca/metabolites/HMDB0000345	Exogenous,Endogenous
2-Ethyl-2-Hydroxybutyric acid	m168	HMDB0001975			rpneg	C6H12O3	1	Fatty Acyls	Lipids and lipid-like molecules	2-Ethyl-2-Hydroxybutyric acid	https://hmdb.ca/metabolites/HMDB0001975	Exogenous,Endogenous
2-Methyl-3-hydroxyvaleric acid	m169	HMDB0029166			rpneg	C6H12O3	2	Fatty Acyls	Lipids and lipid-like molecules	2-Methyl-3-hydroxyvaleric acid	https://hmdb.ca/metabolites/HMDB0029166
Leucinic acid	m170	HMDB0000665			rpneg	C6H12O3	1	Fatty Acyls	Lipids and lipid-like molecules	Leucinic acid	https://hmdb.ca/metabolites/HMDB0000665	Exogenous,Endogenous
Mevalonic acid	m171	HMDB0000227	C00418		rpneg	C6H12O4	2	Fatty Acyls	Lipids and lipid-like molecules	Mevalonic acid	https://hmdb.ca/metabolites/HMDB0000227	Exogenous
Pantoic acid	m172	HMDB0240389	C00522		rpneg	C6H12O4	2	Fatty Acyls	Lipids and lipid-like molecules	Pantoic acid	https://hmdb.ca/metabolites/HMDB0240389
2-Octenedioic acid	m173	HMDB0000341			rpneg	C8H12O4	2	Fatty Acyls	Lipids and lipid-like molecules	2-Octenedioic acid	https://hmdb.ca/metabolites/HMDB0000341	Exogenous,Endogenous
Valproic Acid	m174	HMDB0001877	C07185		rpneg	C8H16O2	2	Fatty Acyls	Lipids and lipid-like molecules	Valproic acid	https://hmdb.ca/metabolites/HMDB0001877	Exogenous
Hydroxyoctanoic acid	m175	HMDB0000711			rpneg	C8H16O3	2	Fatty Acyls	Lipids and lipid-like molecules	Hydroxyoctanoic acid	https://hmdb.ca/metabolites/HMDB0000711	Exogenous,Endogenous
3-Hydroxyoctanoic acid	m176	HMDB0001954	C20793		rpneg	C8H16O3	2	Hydroxy acids and derivatives	Organic acids and derivatives	3-Hydroxyoctanoic acid	https://hmdb.ca/metabolites/HMDB0001954	Exogenous,Endogenous
Decadienedioic acid	m177	HMDB0242172			rpneg	C10H14O4	2	Fatty Acyls	Lipids and lipid-like molecules	Decadienedioic acid	https://hmdb.ca/metabolites/HMDB0242172
(8Z)-dec-8-enoic acid	m178	HMDB0340525			rpneg	C10H18O2	2	Fatty Acyls	Lipids and lipid-like molecules	(8Z)-dec-8-enoic acid	https://hmdb.ca/metabolites/HMDB0340525
Dodecadienoic acid	m179	HMDB0302621			rpneg	C12H20O2	2	Fatty Acyls	Lipids and lipid-like molecules	Dodecadienoic acid	https://hmdb.ca/metabolites/HMDB0302621	Exogenous
3-Oxododecanoic acid	m180	HMDB0010727	C02367		rpneg	C12H22O3	2	Keto acids and derivatives	Organic acids and derivatives	3-Oxododecanoic acid	https://hmdb.ca/metabolites/HMDB0010727	Exogenous,Endogenous
Dodecanedioic acid	m181	HMDB0000623	C02678		rpneg	C12H22O4	2	Fatty Acyls	Lipids and lipid-like molecules	Dodecanedioic acid	https://hmdb.ca/metabolites/HMDB0000623	Exogenous,Endogenous
Dodecanoic acid	m182	HMDB0000638	C02679		rpneg	C12H24O2	1	Fatty Acyls	Lipids and lipid-like molecules	Dodecanoic acid	https://hmdb.ca/metabolites/HMDB0000638	Exogenous,Endogenous
3M5	m183	HMDB0112084			rpneg	C13H20O3	2	Fatty Acyls	Lipids and lipid-like molecules	3-Methyl-5-pentyl-2-furanpropanoic acid	https://hmdb.ca/metabolites/HMDB0112084
3-CMPFP	m184	HMDB0061643			rpneg	C14H20O5	2	Fatty Acyls	Lipids and lipid-like molecules	3-carboxy-4-methyl-5-pentyl-2-furanpropanoic acid	https://hmdb.ca/metabolites/HMDB0061643
Goshuyic acid	m185	HMDB0000560			rpneg	C14H24O2	2	Fatty Acyls	Lipids and lipid-like molecules	Goshuyic acid	https://hmdb.ca/metabolites/HMDB0000560	Exogenous,Endogenous
5-Tetradecenoic acid	m186	HMDB0000499			rpneg	C14H26O2	2	Fatty Acyls	Lipids and lipid-like molecules	5-Tetradecenoic acid	https://hmdb.ca/metabolites/HMDB0000499	Exogenous,Endogenous
3-Oxotetradecanoic acid	m187	HMDB0010730			rpneg	C14H26O3	2	Fatty Acyls	Lipids and lipid-like molecules	3-Oxotetradecanoic acid	https://hmdb.ca/metabolites/HMDB0010730
2-methyl-tridecanedioic acid	m188			LMFA01170015	rpneg	C14H26O4	2	Fatty Acyls	Lipids and lipid-like molecules	2-methyl-tridecanedioic acid	http://www.lipidmaps.org/data/LMSDRecord.php?LMID=LMFA01170015
Myristic acid	m189	HMDB0000806	C06424		rpneg	C14H28O2	1	Fatty Acyls	Lipids and lipid-like molecules	Myristic acid	https://hmdb.ca/metabolites/HMDB0000806
Pentadecanoic acid	m190	HMDB0000826	C16537		rpneg	C15H30O2	1	Fatty Acyls	Lipids and lipid-like molecules	Pentadecanoic acid	https://hmdb.ca/metabolites/HMDB0000826	Exogenous,Endogenous
7Z,10Z-Hexadecadienoic acid	m191	HMDB0000477			rpneg	C16H28O2	2	Fatty Acyls	Lipids and lipid-like molecules	7Z,10Z-Hexadecadienoic acid	https://hmdb.ca/metabolites/HMDB0000477
Palmitoleic acid	m192	HMDB0003229	C08362		rpneg	C16H30O2	2	Fatty Acyls	Lipids and lipid-like molecules	Palmitoleic acid	https://hmdb.ca/metabolites/HMDB0003229	Exogenous
Palmitic acid	m193	HMDB0000220	C00249		rpneg	C16H32O2	1	Fatty Acyls	Lipids and lipid-like molecules	Palmitic acid	https://hmdb.ca/metabolites/HMDB0000220
9Z-Heptadecenoic acid	m194	HMDB0062437			rpneg	C17H32O2	2	Fatty Acyls	Lipids and lipid-like molecules	9Z-Heptadecenoic acid	https://hmdb.ca/metabolites/HMDB0062437	Exogenous,Endogenous
Alpha-Linolenic acid	m195	HMDB0001388	C06427		rpneg	C18H30O2	2	Fatty Acyls	Lipids and lipid-like molecules	alpha-Linolenic acid	https://hmdb.ca/metabolites/HMDB0001388
13(S)-HpOTrE	m196	HMDB0301803	C04785		rpneg	C18H30O4	2	Fatty Acyls	Lipids and lipid-like molecules	13(S)-Hydroperoxylinolenic acid	https://hmdb.ca/metabolites/HMDB0301803	Exogenous
Linoleic acid	m197	HMDB0000673	C01595		rpneg	C18H32O2	1	Fatty Acyls	Lipids and lipid-like molecules	Linoleic acid	https://hmdb.ca/metabolites/HMDB0000673
13-HODE	m198	HMDB0004667	C14762		rpneg	C18H32O3	2	Fatty Acyls	Lipids and lipid-like molecules	13-HODE	https://hmdb.ca/metabolites/HMDB0004667	Exogenous
11-HpODE	m199	HMDB0062281	C07338		rpneg	C18H32O4	2	Fatty Acyls	Lipids and lipid-like molecules	11-HpODE	https://hmdb.ca/metabolites/HMDB0062281
Oleic acid	m200	HMDB0000207	C00712		rpneg	C18H34O2	1	Fatty Acyls	Lipids and lipid-like molecules	Oleic acid/7Z-octadecenoic acid/cis-Vaccenic acid	https://hmdb.ca/metabolites/HMDB0000207	Exogenous
9,12,13-TriHOME	m201	HMDB0004708	C14833		rpneg	C18H34O5	2	Fatty Acyls	Lipids and lipid-like molecules	9,12,13-TriHOME	https://hmdb.ca/metabolites/HMDB0004708	Exogenous,Endogenous
Eicosapentaenoic acid	m202	HMDB0001999	C06428		rpneg	C20H30O2	2	Fatty Acyls	Lipids and lipid-like molecules	Eicosapentaenoic acid	https://hmdb.ca/metabolites/HMDB0001999	Exogenous
Arachidonic acid	m203	HMDB0001043	C00219		rpneg	C20H32O2	2	Fatty Acyls	Lipids and lipid-like molecules	Arachidonic acid	https://hmdb.ca/metabolites/HMDB0001043	Exogenous,Endogenous
5,8,11-Eicosatrienoic acid	m204	HMDB0010378			rpneg	C20H34O2	2	Fatty Acyls	Lipids and lipid-like molecules	5,8,11-Eicosatrienoic acid	https://hmdb.ca/metabolites/HMDB0010378
14,15-DiHETrE	m205	HMDB0002265	C14775		rpneg	C20H34O4	2	Fatty Acyls	Lipids and lipid-like molecules	14,15-DiHETrE	https://hmdb.ca/metabolites/HMDB0002265	Exogenous
Eicosadienoic acid	m206	HMDB0005060	C16525		rpneg	C20H36O2	2	Fatty Acyls	Lipids and lipid-like molecules	Eicosadienoic acid	https://hmdb.ca/metabolites/HMDB0005060	Exogenous
11-Eicosenoic acid	m207	HMDB0002231	C16526		rpneg	C20H38O2	2	Fatty Acyls	Lipids and lipid-like molecules	11Z-Eicosenoic acid	https://hmdb.ca/metabolites/HMDB0002231	Exogenous,Endogenous
Docosahexaenoic acid	m208	HMDB0002183	C06429		rpneg	C22H32O2	1	Fatty Acyls	Lipids and lipid-like molecules	Docosahexaenoic acid	https://hmdb.ca/metabolites/HMDB0002183
FFA C22:5	m209	HMDB0001976			rpneg	C22H34O2	2	Fatty Acyls	Lipids and lipid-like molecules	Docosapentaenoic acid	https://hmdb.ca/metabolites/HMDB0001976
L-Lactic acid	m210	HMDB0000190	C00186		rpneg	C3H6O3	1	Hydroxy acids and derivatives	Organic acids and derivatives	L-Lactic acid	https://hmdb.ca/metabolites/HMDB0000190	Exogenous
L-Malic acid	m211	HMDB0000156	C00149		rpneg	C4H6O5	1	Hydroxy acids and derivatives	Organic acids and derivatives	Malic acid	https://hmdb.ca/metabolites/HMDB0000156	Exogenous
(R)-3-Hydroxybutyric acid	m212	HMDB0000011	C01089		rpneg	C4H8O3	2	Hydroxy acids and derivatives	Organic acids and derivatives	3-Hydroxybutyric acid	https://hmdb.ca/metabolites/HMDB0000011	Exogenous,Endogenous
(S)-3-Hydroxyisobutyric acid	m213	HMDB0000023	C06001		rpneg	C4H8O3	2	Hydroxy acids and derivatives	Organic acids and derivatives	(S)-3-Hydroxyisobutyric acid	https://hmdb.ca/metabolites/HMDB0000023	Exogenous,Endogenous
2-Hydroxybutyric acid	m214	HMDB0000008	C05984		rpneg	C4H8O3	2	Hydroxy acids and derivatives	Organic acids and derivatives	2-Hydroxybutyric acid	https://hmdb.ca/metabolites/HMDB0000008	Exogenous,Endogenous
2,4-Dihydroxybutanoic acid	m215	HMDB0000360			rpneg	C4H8O4	2	Hydroxy acids and derivatives	Organic acids and derivatives	2,4-Dihydroxybutanoic acid	https://hmdb.ca/metabolites/HMDB0000360	Exogenous,Endogenous
2-Deoxypentonic acid	m216	HMDB0059753			rpneg	C5H10O5	2	Hydroxy acids and derivatives	Organic acids and derivatives	2-Deoxypentonic acid	https://hmdb.ca/metabolites/HMDB0059753
2-Deoxyribonic acid	m217	HMDB0000366			rpneg	C5H10O5	2	Hydroxy acids and derivatives	Organic acids and derivatives	2-Deoxyribonic acid	https://hmdb.ca/metabolites/HMDB0000366	Exogenous,Endogenous
2-Hydroxydecanedioic acid	m218	HMDB0000424			rpneg	C10H18O5	1	Hydroxy acids and derivatives	Organic acids and derivatives	2-Hydroxydecanedioic acid	https://hmdb.ca/metabolites/HMDB0000424
3-Hydroxycapric acid	m219	HMDB0002203			rpneg	C10H20O3	2	Hydroxy acids and derivatives	Organic acids and derivatives	3-Hydroxycapric acid	https://hmdb.ca/metabolites/HMDB0002203	Exogenous,Endogenous
3-Hydroxydodecanoic acid	m220	HMDB0000387			rpneg	C12H24O3	2	Hydroxy acids and derivatives	Organic acids and derivatives	3-Hydroxydodecanoic acid	https://hmdb.ca/metabolites/HMDB0000387	Exogenous,Endogenous
Indoleacetic acid	m221	HMDB0000197	C00954		rpneg	C10H9NO2	1	Indoles and derivatives	Organoheterocyclic compounds	Indoleacetic acid	https://hmdb.ca/metabolites/HMDB0000197	Exogenous
3-Indolepropionic acid	m222	HMDB0002302			rpneg	C11H11NO2	1	Indoles and derivatives	Organoheterocyclic compounds	Indole-3-propionic acid	https://hmdb.ca/metabolites/HMDB0002302	Exogenous,Endogenous
Alline	m223	HMDB0030533			rpneg	C11H14N2O	2	Indoles and derivatives	Organoheterocyclic compounds	Alline	https://hmdb.ca/metabolites/HMDB0030533	Exogenous,Endogenous
Indoleacrylic acid	m224	HMDB0000734			rpneg	C11H9NO2	2	Indoles and derivatives	Organoheterocyclic compounds	Indoleacrylic acid	https://hmdb.ca/metabolites/HMDB0000734	Exogenous
Glyoxylic acid*	m225	HMDB0000119	C00048		rpneg	C2H2O3	2	Carboxylic acids and derivatives	Organic acids and derivatives	Glyoxylic acid	https://hmdb.ca/metabolites/HMDB0000119	Exogenous
Pyruvate*	m226	HMDB0000243	C00022		rpneg	C3H4O3	1	Keto acids and derivatives	Organic acids and derivatives	Pyruvic acid	https://hmdb.ca/metabolites/HMDB0000243	Exogenous
Oxalacetate*	m227	HMDB0000223	C00036		rpneg	C4H4O5	1	Keto acids and derivatives	Organic acids and derivatives	Oxalacetic acid	https://hmdb.ca/metabolites/HMDB0000223	Exogenous
2-Ketobutyric acid*	m228	HMDB0000005	C00109		rpneg	C4H6O3	1	Keto acids and derivatives	Organic acids and derivatives	2-Ketobutyric acid	https://hmdb.ca/metabolites/HMDB0000005	Exogenous
Oxoglutaric acid*	m229	HMDB0000208	C00026		rpneg	C5H6O5	1	Keto acids and derivatives	Organic acids and derivatives	Oxoglutaric acid	https://hmdb.ca/metabolites/HMDB0000208	Exogenous,Endogenous
2-Keto-glutaramic acid*	m230	HMDB0001552	C00940		rpneg	C5H7NO4	2	Keto acids and derivatives	Organic acids and derivatives	2-Keto-glutaramic acid	https://hmdb.ca/metabolites/HMDB0001552	Exogenous,Endogenous
2-Methylacetoacetic acid	m231	HMDB0003771			rpneg	C5H8O3	2	Keto acids and derivatives	Organic acids and derivatives	2-Methylacetoacetic acid	https://hmdb.ca/metabolites/HMDB0003771	Exogenous,Endogenous
alpha-Ketoisovaleric acid*	m232	HMDB0000019	C00141		rpneg	C5H8O3	1	Keto acids and derivatives	Organic acids and derivatives	alpha-Ketoisovaleric acid	https://hmdb.ca/metabolites/HMDB0000019	Exogenous,Endogenous
2-Methyl-3-ketovaleric acid	m233	HMDB0000408			rpneg	C6H10O3	2	Keto acids and derivatives	Organic acids and derivatives	2-Methyl-3-ketovaleric acid	https://hmdb.ca/metabolites/HMDB0000408	Exogenous,Endogenous
3-Oxohexanoic acid	m234	HMDB0010717	C02122		rpneg	C6H10O3	2	Keto acids and derivatives	Organic acids and derivatives	3-Oxohexanoic acid	https://hmdb.ca/metabolites/HMDB0010717	Exogenous,Endogenous
Ketoleucine*	m235	HMDB0000695	C00233		rpneg	C6H10O3	1	Keto acids and derivatives	Organic acids and derivatives	Ketoleucine	https://hmdb.ca/metabolites/HMDB0000695	Exogenous
Oxoadipic acid*	m236	HMDB0000225	C00322		rpneg	C6H8O5	2	Keto acids and derivatives	Organic acids and derivatives	Oxoadipic acid	https://hmdb.ca/metabolites/HMDB0000225	Exogenous,Endogenous
3-Oxodecanoic acid	m237	HMDB0010724			rpneg	C10H18O3	2	Keto acids and derivatives	Organic acids and derivatives	3-Oxodecanoic acid	https://hmdb.ca/metabolites/HMDB0010724
sn2 LysoPC(14:0)	m238			LMGP01050073	rpneg	C22H46NO7P	2	Glycerophospholipids	Lipids and lipid-like molecules	PC(0:0/14:0)	https://www.lipidmaps.org/databases/lmsd/LMGP01050073
sn1 LysoPC(16:0)	m239	HMDB0010382			rpneg	C24H50NO7P	2	Glycerophospholipids	Lipids and lipid-like molecules	LysoPC(16:0/0:0)	https://hmdb.ca/metabolites/HMDB0010382	Exogenous,Endogenous
sn2 LysoPC(16:0)	m240	HMDB0240262			rpneg	C24H50NO7P	2	Glycerophospholipids	Lipids and lipid-like molecules	LysoPC(0:0/16:0)	https://hmdb.ca/metabolites/HMDB0240262
sn1 LysoPC(18:1)	m241	HMDB0002815			rpneg	C26H52NO7P	1	Glycerophospholipids	Lipids and lipid-like molecules	LysoPC(18:1(9Z)/0:0)	https://hmdb.ca/metabolites/HMDB0002815	Exogenous
sn2 LysoPC(18:1)	m242	HMDB0061701			rpneg	C26H52NO7P	1	Glycerophospholipids	Lipids and lipid-like molecules	LysoPC(0:0/18:1(9Z))	https://hmdb.ca/metabolites/HMDB0061701
sn1 LysoPC(18:2)	m243	HMDB0010386			rpneg	C26H50NO7P	2	Glycerophospholipids	Lipids and lipid-like molecules	LysoPC(18:2(9Z,12Z)/0:0)	https://hmdb.ca/metabolites/HMDB0010386	Exogenous
sn1 LysoPE(16:1)	m244	HMDB0011504			rpneg	C21H42NO7P	2	Glycerophospholipids	Lipids and lipid-like molecules	LysoPE(16:1(9Z)/0:0)	https://hmdb.ca/metabolites/HMDB0011504	Exogenous
sn1 LysoPE(16:0)	m245	HMDB0011503			rpneg	C21H44NO7P	2	Glycerophospholipids	Lipids and lipid-like molecules	LysoPE(16:0/0:0)	https://hmdb.ca/metabolites/HMDB0011503	Exogenous,Endogenous
sn2 LysoPE(16:0)	m246	HMDB0011473			rpneg	C21H44NO7P	2	Glycerophospholipids	Lipids and lipid-like molecules	LysoPE(0:0/16:0)	https://hmdb.ca/metabolites/HMDB0011473	Exogenous,Endogenous
sn1 LysoPE(18:1)	m247	HMDB0011505			rpneg	C23H46NO7P	1	Glycerophospholipids	Lipids and lipid-like molecules	LysoPE(18:1(11Z)/0:0)	https://hmdb.ca/metabolites/HMDB0011505
sn2 LysoPE(18:1)	m248	HMDB0011475			rpneg	C23H46NO7P	1	Glycerophospholipids	Lipids and lipid-like molecules	LysoPE(0:0/18:1(11Z))	https://hmdb.ca/metabolites/HMDB0011475	Exogenous
sn2 LysoPE(18:2)	m249	HMDB0011477			rpneg	C23H44NO7P	2	Glycerophospholipids	Lipids and lipid-like molecules	LysoPE(0:0/18:2(9Z,12Z))	https://hmdb.ca/metabolites/HMDB0011477	Exogenous
sn1 LysoPE(20:2)	m250	HMDB0011513			rpneg	C25H48NO7P	2	Glycerophospholipids	Lipids and lipid-like molecules	LysoPE(20:2(11Z,14Z)/0:0)	https://hmdb.ca/metabolites/HMDB0011513	Exogenous
sn2 LysoPE(20:2)	m251	HMDB0011483			rpneg	C25H48NO7P	2	Glycerophospholipids	Lipids and lipid-like molecules	LysoPE(0:0/20:2(11Z,14Z))	https://hmdb.ca/metabolites/HMDB0011483	Exogenous
sn2 LysoPE(20:4)	m252	HMDB0011487			rpneg	C25H44NO7P	2	Glycerophospholipids	Lipids and lipid-like molecules	LysoPE(0:0/20:4(5Z,8Z,11Z,14Z))	https://hmdb.ca/metabolites/HMDB0011487	Exogenous
sn2 LysoPE(22:6)	m253	HMDB0011496			rpneg	C27H44NO7P	2	Glycerophospholipids	Lipids and lipid-like molecules	LysoPE(0:0/22:6(4Z,7Z,10Z,13Z,16Z,19Z))	https://hmdb.ca/metabolites/HMDB0011496	Exogenous
Pseudouridine	m254	HMDB0000767	C02067		rpneg	C9H12N2O6	1	Nucleoside and nucleotide analogues	Nucleosides	Pseudouridine	https://hmdb.ca/metabolites/HMDB0000767	Exogenous
Uridine	m255	HMDB0000296	C00299		rpneg	C9H12N2O6	1	Pyrimidine nucleosides	Nucleosides	Uridine	https://hmdb.ca/metabolites/HMDB0000296	Exogenous
Inosine	m256	HMDB0000195	C00294		rpneg	C10H12N4O5	1	Purine nucleosides	Nucleosides	Inosine	https://hmdb.ca/metabolites/HMDB0000195	Exogenous
Xanthosine	m257	HMDB0000299	C01762		rpneg	C10H12N4O6	1	Purine nucleosides	Nucleosides	Xanthosine	https://hmdb.ca/metabolites/HMDB0000299	Exogenous
Ribothymidine	m258	HMDB0000884			rpneg	C10H14N2O6	1	Pyrimidine nucleosides	Nucleosides	Ribothymidine	https://hmdb.ca/metabolites/HMDB0000884
AMP	m259	HMDB0000045	C00020		rpneg	C10H14N5O7P	1	Purine nucleotides	Nucleosides	Adenosine monophosphate	https://hmdb.ca/metabolites/HMDB0000045	Exogenous
Phenol sulphate	m260	HMDB0060015	C02180		rpneg	C6H6O4S	2	Organic sulfuric acids and derivatives	Organic acids and derivatives	Phenol sulphate	https://hmdb.ca/metabolites/HMDB0060015	Exogenous
Hydroquinone sulfate	m261	HMDB0240263			rpneg	C6H6O5S	2	Organic sulfuric acids and derivatives	Organic acids and derivatives	Hydroquinone sulfate	https://hmdb.ca/metabolites/HMDB0240263
2-(2,6-Dioxo-1,2,3,6-tetrahydropyrimidin-4-yl)ethanesulfonicacid	m262			PubChem 45093593	rpneg	C6H8N2O5S	2	Organic sulfuric acids and derivatives	Organic acids and derivatives	2-(2,6-Dioxo-1,2,3,6-tetrahydropyrimidin-4-yl)ethane-1-sulfonic acid	https://pubchem.ncbi.nlm.nih.gov/compound/45093593
2-Hydroxy-3-(sulfooxy)benzoate	m263	HMDB0134105			rpneg	C7H6O7S	2	Organic sulfuric acids and derivatives	Organic acids and derivatives	2-hydroxy-3-(sulfooxy)benzoic acid	https://hmdb.ca/metabolites/HMDB0134105	Exogenous,Endogenous
p-Cresol sulfate	m264	HMDB0011635			rpneg	C7H8O4S	1	Organic sulfuric acids and derivatives	Organic acids and derivatives	p-Cresol sulfate	https://hmdb.ca/metabolites/HMDB0011635	Exogenous
4-Ethylphenylsulfate	m265	HMDB0062551			rpneg	C8H10O4S	1	Organic sulfuric acids and derivatives	Organic acids and derivatives	4-Ethylphenylsulfate	https://hmdb.ca/metabolites/HMDB0062551	Exogenous,Endogenous
Hydroxytyrosol 4'-sulfate	m266	HMDB0240532			rpneg	C8H10O6S	2	Organic sulfuric acids and derivatives	Organic acids and derivatives	Hydroxytyrosol 4'-sulfate	https://hmdb.ca/metabolites/HMDB0240532	Exogenous
Indoxyl sulfate	m267	HMDB0000682			rpneg	C8H7NO4S	1	Organic sulfuric acids and derivatives	Organic acids and derivatives	Indoxyl sulfate	https://hmdb.ca/metabolites/HMDB0000682
4-vinylphenol Sulfate	m268	HMDB0062775			rpneg	C8H8O4S	2	Organic sulfuric acids and derivatives	Organic acids and derivatives	4-Vinylphenol sulfate	https://hmdb.ca/metabolites/HMDB0062775	Exogenous,Endogenous
4-Allylphenol sulfate	m269	HMDB0170765			rpneg	C9H10O4S	2	Organic sulfuric acids and derivatives	Organic acids and derivatives	4-Allylphenol sulfate	https://hmdb.ca/metabolites/HMDB0170765
Mhppa sulfate	m270	HMDB0094710			rpneg	C9H10O6S	2	Organic sulfuric acids and derivatives	Organic acids and derivatives	3-[3-(Sulfooxy)phenyl]propanoic acid	https://hmdb.ca/metabolites/HMDB0094710
Dihydrocaffeic acid 3-sulfate	m271	HMDB0041721			rpneg	C9H10O7S	2	Organic sulfuric acids and derivatives	Organic acids and derivatives	Dihydrocaffeic acid 3-sulfate	https://hmdb.ca/metabolites/HMDB0041721	Exogenous,Endogenous
Homovanillic acid sulfate	m272	HMDB0011719			rpneg	C9H10O7S	2	Organic sulfuric acids and derivatives	Organic acids and derivatives	Homovanillic acid sulfate	https://hmdb.ca/metabolites/HMDB0011719	Exogenous,Endogenous
2-methoxyacetaminophen sulfate	m273	HMDB0062550			rpneg	C9H11NO6S	2	Organic sulfuric acids and derivatives	Organic acids and derivatives	2-Methoxyacetaminophen sulfate	https://hmdb.ca/metabolites/HMDB0062550	Endogenous
2,5-Furandicarboxylic acid	m274	HMDB0004812	C20450		rpneg	C6H4O5	2	Furans	Organoheterocyclic compounds	2,5-Furandicarboxylic acid	https://hmdb.ca/metabolites/HMDB0004812	Exogenous,Endogenous
3-Dehydroquinate	m275	HMDB0012710	C00944		rpneg	C7H10O6	2	Hydroxy acids and derivatives	Organic acids and derivatives	3-Dehydroquinic acid	https://hmdb.ca/metabolites/HMDB0012710	Exogenous,Endogenous
2-Methoxyhydroquinone	m276			PubChem 69988	rpneg	C7H8O3	2	Others	Unknown	2-Methoxyhydroquinone	https://pubchem.ncbi.nlm.nih.gov/compound/69988
4-Pyridoxic acid	m277	HMDB0000017	C00847		rpneg	C8H9NO4	1	Pyridines and derivatives	Organoheterocyclic compounds	4-Pyridoxic acid	https://hmdb.ca/metabolites/HMDB0000017	Exogenous,Endogenous
Pantothenic acid	m278	HMDB0000210	C00864		rpneg	C9H17NO5	1	Organooxygen compounds	Organic oxygen compounds	Pantothenic acid	https://hmdb.ca/metabolites/HMDB0000210	Exogenous
[3-(4-methoxyphenyl)propoxy]sulfonic acid	m279			PubChem 131839250	rpneg	C10H14O5S	2	Others	Unknown	[3-(4-methoxyphenyl)propoxy]sulfonic acid	https://pubchem.ncbi.nlm.nih.gov/compound/131839250
Acetylcarnosine	m280	HMDB0012881			rpneg	C11H16N4O4	2	Peptidomimetics	Organic acids and derivatives	Acetylcarnosine	https://hmdb.ca/metabolites/HMDB0012881	Endogenous
2-Carboxy-5-decanolide	m281	HMDB0030985			rpneg	C11H18O4	2	Lactones	Organoheterocyclic compounds	alpha-Carboxy-delta-decalactone	https://hmdb.ca/metabolites/HMDB0030985	Exogenous,Endogenous
Phenylgalactoside	m282			PubChem 102336	rpneg	C12H16O6	2	Others	Unknown	Phenylgalactoside	https://pubchem.ncbi.nlm.nih.gov/compound/102336
C16 Sphingosine-1-phosphate	m283	HMDB0060061			rpneg	C16H34NO5P	2	Organic phosphoric acids and derivatives	Organic acids and derivatives	Sphingosine 1-phosphate (d16:1-P)	https://hmdb.ca/metabolites/HMDB0060061
MG(0:0/14:1(9Z)/0:0)	m284	HMDB0011531			rpneg	C17H32O4	2	Glycerolipids	Lipids and lipid-like molecules	MG(0:0/14:1(9Z)/0:0)	https://hmdb.ca/metabolites/HMDB0011531	Exogenous
(3b,6b,8a,12a)-8,12-Epoxy-7(11)-eremophilene-6,8,12-trimethoxy-3-ol	m285	HMDB0031963			rpneg	C18H30O5	2	Naphthofurans	Organoheterocyclic compounds	(3b,6b,8a,12a)-8,12-Epoxy-7(11)-eremophilene-6,8,12-trimethoxy-3-ol	https://hmdb.ca/metabolites/HMDB0031963	Exogenous,Endogenous
Sphingosine 1-phosphate	m286	HMDB0000277	C06124		rpneg	C18H38NO5P	2	Sphingolipids	Lipids and lipid-like molecules	Sphingosine 1-phosphate	https://hmdb.ca/metabolites/HMDB0000277	Exogenous,Endogenous
Sphinganine 1-phosphate	m287	HMDB0001383	C01120		rpneg	C18H40NO5P	2	Sphingolipids	Lipids and lipid-like molecules	Sphinganine 1-phosphate	https://hmdb.ca/metabolites/HMDB0001383	Exogenous,Endogenous
Dihydroisomorphine-6-glucuronide	m288	HMDB0061137			rpneg	C23H29NO9	2	Morphinans	Alkaloids	Dihydroisomorphine-6-glucuronide	https://hmdb.ca/metabolites/HMDB0061137
23S,25,26-Trihydroxyvitamin D3	m289	HMDB0060134			rpneg	C27H44O4	2	Steroids and steroid derivatives	Lipids and lipid-like molecules	23S,25,26-Trihydroxyvitamin D3	https://hmdb.ca/metabolites/HMDB0060134
Methyl-erythritol-4-phosphate	m290	HMDB0304061	C11434		rpneg	C5H13O7P	2	Organic phosphoric acids and derivatives	Organic acids and derivatives	2-C-methyl-D-erythritol-4-phosphate	https://hmdb.ca/metabolites/HMDB0304061	Exogenous
Succinyladenosine	m291	HMDB0000912			rpneg	C14H17N5O8	1	Purine nucleosides	Nucleosides	Succinyladenosine	https://hmdb.ca/metabolites/HMDB0000912	Exogenous,Endogenous
7,8-Dihydropteroic acid	m292	HMDB0001412	C00921		rpneg	C14H14N6O3	2	Pteridines and derivatives	Organoheterocyclic compounds	7,8-Dihydropteroic acid	https://hmdb.ca/metabolites/HMDB0001412	Exogenous
Dihydrouracil	m293	HMDB0000076	C00429		rpneg	C4H6N2O2	2	Diazines	Organoheterocyclic compounds	Dihydrouracil	https://hmdb.ca/metabolites/HMDB0000076	Exogenous
Xanthine	m294	HMDB0000292	C00385		rpneg	C5H4N4O2	1	Imidazopyrimidines	Organoheterocyclic compounds	Xanthine	https://hmdb.ca/metabolites/HMDB0000292	Exogenous
Uric acid	m295	HMDB0000289	C00366		rpneg	C5H4N4O3	1	Imidazopyrimidines	Organoheterocyclic compounds	Uric acid	https://hmdb.ca/metabolites/HMDB0000289	Exogenous,Endogenous
9-Methyluric acid	m296	HMDB0001973			rpneg	C6H6N4O3	2	Imidazopyrimidines	Organoheterocyclic compounds	9-Methyluric acid	https://hmdb.ca/metabolites/HMDB0001973	Exogenous,Endogenous
Theophylline	m297	HMDB0001889	C07130		rpneg	C7H8N4O2	1	Imidazopyrimidines	Organoheterocyclic compounds	Theophylline	https://hmdb.ca/metabolites/HMDB0001889	Exogenous,Endogenous
Deoxyuridine	m298	HMDB0000012	C00526		rpneg	C9H12N2O5	2	Pyrimidine nucleosides	Nucleosides	Deoxyuridine	https://hmdb.ca/metabolites/HMDB0000012	Exogenous,Endogenous
DHEAS	m299	HMDB0001032	C04555		rpneg	C19H28O5S	1	Steroids and steroid derivatives	Lipids and lipid-like molecules	Dehydroepiandrosterone sulfate	https://hmdb.ca/metabolites/HMDB0001032	Exogenous,Endogenous
16alpha-Hydroxy DHEA 3-sulfate	m300	HMDB0062544			rpneg	C19H28O6S	2	Steroids and steroid derivatives	Lipids and lipid-like molecules	16alpha-Hydroxy DHEA 3-sulfate	https://hmdb.ca/metabolites/HMDB0062544	Exogenous,Endogenous
Androsterone sulfate	m301	HMDB0002759			rpneg	C19H30O5S	2	Steroids and steroid derivatives	Lipids and lipid-like molecules	Androsterone sulfate	https://hmdb.ca/metabolites/HMDB0002759	Exogenous,Endogenous
Epiandrosterone Sulfate	m302	HMDB0062657			rpneg	C19H30O5S	2	Steroids and steroid derivatives	Lipids and lipid-like molecules	Epiandrosterone sulfate	https://hmdb.ca/metabolites/HMDB0062657	Exogenous,Endogenous
Etiocholanolone sulfate	m303	HMDB0013232			rpneg	C19H30O5S	2	Steroids and steroid derivatives	Lipids and lipid-like molecules	Etiocholanolone sulfate	https://hmdb.ca/metabolites/HMDB0013232	Exogenous,Endogenous
Unknown sulfated steroids	m304				rpneg	C19H37O5S	3	Steroids and steroid derivatives	Lipids and lipid-like molecules	Unknown sulfated steroids
Pregnenolone sulfate	m305	HMDB0000774			rpneg	C21H32O5S	1	Steroids and steroid derivatives	Lipids and lipid-like molecules	Pregnenolone sulfate	https://hmdb.ca/metabolites/HMDB0000774	Exogenous,Endogenous
Pregnanolone sulfate	m306	HMDB0240590			rpneg	C21H34O5S	2	Steroids and steroid derivatives	Lipids and lipid-like molecules	Pregnanolone sulfate	https://hmdb.ca/metabolites/HMDB0240590
5a-Pregnan-3b,20b-diol 20-sulfate	m307	HMDB0240580			rpneg	C21H36O5S	2	Steroids and steroid derivatives	Lipids and lipid-like molecules	5alpha-Pregnan-3beta,20beta-diol 20-sulfate	https://hmdb.ca/metabolites/HMDB0240580
Stanolone glucuronate	m308	HMDB0006203			rpneg	C25H38O8	2	Steroids and steroid derivatives	Lipids and lipid-like molecules	5-alpha-Dihydrotestosterone glucuronide	https://hmdb.ca/metabolites/HMDB0006203	Exogenous,Endogenous
Androsterone glucuronide	m309	HMDB0002829	C11135		rpneg	C25H38O8	1	Steroids and steroid derivatives	Lipids and lipid-like molecules	Androsterone glucuronide	https://hmdb.ca/metabolites/HMDB0002829	Exogenous,Endogenous
Etiocholanolone glucuronide	m310	HMDB0004484	C11136		rpneg	C25H38O8	2	Steroids and steroid derivatives	Lipids and lipid-like molecules	Etiocholanolone glucuronide	https://hmdb.ca/metabolites/HMDB0004484	Exogenous,Endogenous
Fusicoccin H	m311			PubChem 5281364	rpneg	C26H42O8	2	Steroids and steroid derivatives	Lipids and lipid-like molecules	Fusicoccin H	https://pubchem.ncbi.nlm.nih.gov/compound/5281364
TA-ga	m312	HMDB0010357			rpneg	C27H40O11	2	Steroids and steroid derivatives	Lipids and lipid-like molecules	Tetrahydroaldosterone-3-glucuronide	https://hmdb.ca/metabolites/HMDB0010357	Exogenous,Endogenous
Cortolone-3-glucuronide	m313	HMDB0010320			rpneg	C27H42O11	2	Steroids and steroid derivatives	Lipids and lipid-like molecules	Cortolone-3-glucuronide	https://hmdb.ca/metabolites/HMDB0010320	Exogenous,Endogenous
Pregnanediol 3-O-glucuronide	m314	HMDB0010318			rpneg	C27H44O8	2	Steroids and steroid derivatives	Lipids and lipid-like molecules	Pregnanediol 3-O-glucuronide	https://hmdb.ca/metabolites/HMDB0010318	Exogenous,Endogenous
PT-3g	m315	HMDB0247360			rpneg	C27H44O9	2	Steroids and steroid derivatives	Lipids and lipid-like molecules	Pregnanetriol 3a-O-b-D-glucuronide	https://hmdb.ca/metabolites/HMDB0247360
Chenodeoxycholic acid 3-glucuronide	m316	HMDB0002430			rpneg	C30H48O10	2	Steroids and steroid derivatives	Lipids and lipid-like molecules	(3a,5b,7a)-23-Carboxy-7-hydroxy-24-norcholan-3-yl-b-D-Glucopyranosiduronic acid	https://hmdb.ca/metabolites/HMDB0002430	Exogenous,Endogenous
Deoxycholic acid 3-glucuronide	m317	HMDB0002596			rpneg	C30H48O10	2	Steroids and steroid derivatives	Lipids and lipid-like molecules	Deoxycholic acid 3-glucuronide	https://hmdb.ca/metabolites/HMDB0002596	Exogenous,Endogenous
Glycochenodeoxycholate 3-glucuronide	m318	HMDB0002579			rpneg	C32H51NO11	2	Steroids and steroid derivatives	Lipids and lipid-like molecules	Glycochenodeoxycholic acid 3-glucuronide	https://hmdb.ca/metabolites/HMDB0002579	Exogenous,Endogenous
Isomer of glycochenodeoxycholic acid 3-glucuronide	m319				rpneg	C32H51NO11	3	Steroids and steroid derivatives	Lipids and lipid-like molecules	Isomer of glycochenodeoxycholic acid 3-glucuronide
4-hydroxycoumarin	m320			PubChem 54682930	rpneg	C9H6O3	1	Xenobiotics	Unknown	4-hydroxycoumarin	https://pubchem.ncbi.nlm.nih.gov/compound/54682930
Daphnetin	m321			PubChem 5280569	rpneg	C9H6O4	1	Coumarins and derivatives	Unknown	Daphnetin	https://pubchem.ncbi.nlm.nih.gov/compound/5280569
Isovitexin	m322	HMDB0253708			rpneg	C21H20O10	1	Fatty Acyls	Lipids and lipid-like molecules	Isovitexin	https://hmdb.ca/metabolites/HMDB0253708
Astragalin	m323	HMDB0037429	C12249		rpneg	C21H20O11	1	Flavonoids	Phenylpropanoids and polyketides	Astragalin	https://hmdb.ca/metabolites/HMDB0037429	Exogenous,Endogenous
L-Acetylcarnitine	m324	HMDB0000201	C02571		rppos	C9H17NO4	1	Fatty Acyls	Lipids and lipid-like molecules	L-Acetylcarnitine	https://hmdb.ca/metabolites/HMDB0000201	Exogenous
Propionylcarnitine	m325	HMDB0000824	C03017		rppos	C10H19NO4	1	Fatty Acyls	Lipids and lipid-like molecules	Propionylcarnitine	https://hmdb.ca/metabolites/HMDB0000824	Exogenous,Endogenous
Butyrylcarnitine	m326	HMDB0002013	C02862		rppos	C11H21NO4	1	Fatty Acyls	Lipids and lipid-like molecules	Butyrylcarnitine	https://hmdb.ca/metabolites/HMDB0002013	Exogenous,Endogenous
Isobutyrylcarnitine	m327	HMDB0000736			rppos	C11H21NO4	2	Fatty Acyls	Lipids and lipid-like molecules	Isobutyrylcarnitine	https://hmdb.ca/metabolites/HMDB0000736	Exogenous,Endogenous
(R)-3-hydroxybutyrylcarnitine	m328	HMDB0062735			rppos	C11H21NO5	2	Fatty Acyls	Lipids and lipid-like molecules	(R)-3-hydroxybutyrylcarnitine	https://hmdb.ca/metabolites/HMDB0062735
Tiglylcarnitine	m329	HMDB0002366			rppos	C12H21NO4	2	Fatty Acyls	Lipids and lipid-like molecules	Tiglylcarnitine	https://hmdb.ca/metabolites/HMDB0002366	Exogenous
Isovalerylcarnitine	m330	HMDB0000688			rppos	C12H23NO4	1	Fatty Acyls	Lipids and lipid-like molecules	Isovalerylcarnitine	https://hmdb.ca/metabolites/HMDB0000688	Exogenous,Endogenous
Valerylcarnitine	m331	HMDB0013128			rppos	C12H23NO4	1	Fatty Acyls	Lipids and lipid-like molecules	Valerylcarnitine	https://hmdb.ca/metabolites/HMDB0013128	Exogenous
Pivaloylcarnitine	m332	HMDB0041993			rppos	C12H23NO4	2	Fatty Acyls	Lipids and lipid-like molecules	Pivaloylcarnitine	https://hmdb.ca/metabolites/HMDB0041993	Exogenous
3-Hydroxyisovalerylcarnitine	m333	HMDB0061189			rppos	C12H23NO5	2	Fatty Acyls	Lipids and lipid-like molecules	3-Hydroxyisovalerylcarnitine	https://hmdb.ca/metabolites/HMDB0061189
3-Methylglutarylcarnitine	m334	HMDB0000552			rppos	C13H23NO6	2	Fatty Acyls	Lipids and lipid-like molecules	3-Methylglutarylcarnitine	https://hmdb.ca/metabolites/HMDB0000552	Exogenous,Endogenous
Hexanoylcarnitine	m335	HMDB0000756			rppos	C13H25NO4	1	Fatty Acyls	Lipids and lipid-like molecules	Hexanoylcarnitine	https://hmdb.ca/metabolites/HMDB0000756	Exogenous,Endogenous
2-Octenoylcarnitine	m336	HMDB0013324			rppos	C15H27NO4	2	Fatty Acyls	Lipids and lipid-like molecules	2-Octenoylcarnitine	https://hmdb.ca/metabolites/HMDB0013324
isomer of 2-Octenoylcarnitine	m337				rppos	C15H27NO4	3	Fatty Acyls	Lipids and lipid-like molecules	isomer of 2-Octenoylcarnitine
L-Octanoylcarnitine	m338	HMDB0000791	C02838		rppos	C15H29NO4	2	Fatty Acyls	Lipids and lipid-like molecules	L-Octanoylcarnitine	https://hmdb.ca/metabolites/HMDB0000791	Exogenous,Endogenous
3-hydroxyoctanoyl carnitine	m339	HMDB0061634			rppos	C15H29NO5	2	Fatty Acyls	Lipids and lipid-like molecules	3-hydroxyoctanoyl carnitine	https://hmdb.ca/metabolites/HMDB0061634	Endogenous
isomer of 3-hydroxyoctanoyl carnitine	m340				rppos	C15H29NO5	3	Fatty Acyls	Lipids and lipid-like molecules	isomer of 3-hydroxyoctanoyl carnitine
Dimethyl heptanoyl carnitine	m341	HMDB0006320			rppos	C16H31NO4	2	Fatty Acyls	Lipids and lipid-like molecules	2,6 Dimethylheptanoyl carnitine	https://hmdb.ca/metabolites/HMDB0006320	Exogenous,Endogenous
Decatrienoylcarnitine	m342	HMDB0240752			rppos	C17H27NO4	2	Fatty Acyls	Lipids and lipid-like molecules	Decatrienoylcarnitine	https://hmdb.ca/metabolites/HMDB0240752	Endogenous
Isomer of Decatrienoylcarnitine	m343				rppos	C17H27NO4	3	Fatty Acyls	Lipids and lipid-like molecules	Isomer of Decatrienoylcarnitine
2-trans,4-cis-Decadienoylcarnitine	m344	HMDB0013325			rppos	C17H29NO4	2	Fatty Acyls	Lipids and lipid-like molecules	2-trans,4-cis-Decadienoylcarnitine	https://hmdb.ca/metabolites/HMDB0013325	Exogenous
9-Decenoylcarnitine	m345	HMDB0013205			rppos	C17H31NO4	2	Fatty Acyls	Lipids and lipid-like molecules	9-Decenoylcarnitine	https://hmdb.ca/metabolites/HMDB0013205	Exogenous,Endogenous
cis-4-Decenoylcarnitine	m346	HMDB0240585			rppos	C17H31NO4	2	Fatty Acyls	Lipids and lipid-like molecules	cis-4-Decenoylcarnitine	https://hmdb.ca/metabolites/HMDB0240585
O-decanoyl-L-carnitine	m347	HMDB0000651	C03299		rppos	C17H33NO4	2	Fatty Acyls	Lipids and lipid-like molecules	O-decanoyl-L-carnitine	https://hmdb.ca/metabolites/HMDB0000651
3-hydroxydecanoyl carnitine	m348	HMDB0061636			rppos	C17H33NO5	2	Fatty Acyls	Lipids and lipid-like molecules	3-hydroxydecanoyl carnitine	https://hmdb.ca/metabolites/HMDB0061636
4,8 Dimethylnonanoyl carnitine	m349	HMDB0006202			rppos	C18H35NO4	2	Fatty Acyls	Lipids and lipid-like molecules	4,8 Dimethylnonanoyl carnitine	https://hmdb.ca/metabolites/HMDB0006202	Exogenous,Endogenous
Dodecanoylcarnitine	m350	HMDB0002250			rppos	C19H37NO4	1	Fatty Acyls	Lipids and lipid-like molecules	Dodecanoylcarnitine	https://hmdb.ca/metabolites/HMDB0002250
3-hydroxydodecanoyl carnitine	m351	HMDB0061638			rppos	C19H37NO5	2	Fatty Acyls	Lipids and lipid-like molecules	3-hydroxydodecanoyl carnitine	https://hmdb.ca/metabolites/HMDB0061638
Tridecanoylcarnitine	m352	HMDB0241308			rppos	C20H39NO4	2	Fatty Acyls	Lipids and lipid-like molecules	Tridecanoylcarnitine	https://hmdb.ca/metabolites/HMDB0241308
3, 5-Tetradecadiencarnitine	m353	HMDB0013331			rppos	C21H37NO4	2	Fatty Acyls	Lipids and lipid-like molecules	3, 5-Tetradecadiencarnitine	https://hmdb.ca/metabolites/HMDB0013331
cis-5-Tetradecenoylcarnitine	m354	HMDB0002014			rppos	C21H39NO4	2	Fatty Acyls	Lipids and lipid-like molecules	cis-5-Tetradecenoylcarnitine	https://hmdb.ca/metabolites/HMDB0002014	Exogenous
3-Hydroxy-cis-5-tetradecenoylcarnitine	m355	HMDB0013330			rppos	C21H39NO5	2	Fatty Acyls	Lipids and lipid-like molecules	3-Hydroxy-cis-5-tetradecenoylcarnitine	https://hmdb.ca/metabolites/HMDB0013330	Exogenous
Tetradecanoylcarnitine	m356	HMDB0005066			rppos	C21H41NO4	1	Fatty Acyls	Lipids and lipid-like molecules	Tetradecanoylcarnitine	https://hmdb.ca/metabolites/HMDB0005066	Exogenous,Endogenous
3-Hydroxymyristoylcarnitine	m357	HMDB0061640			rppos	C21H41NO5	2	Fatty Acyls	Lipids and lipid-like molecules	3-Hydroxytetradecanoyl carnitine	https://hmdb.ca/metabolites/HMDB0061640
9,12-Hexadecadienoylcarnitine	m358	HMDB0013334			rppos	C23H41NO4	2	Fatty Acyls	Lipids and lipid-like molecules	9,12-Hexadecadienoylcarnitine	https://hmdb.ca/metabolites/HMDB0013334	Exogenous
(2E)-Hexadecenoyl-carnitine	m359	HMDB0006317			rppos	C23H43NO4	2	Fatty Acyls	Lipids and lipid-like molecules	trans-Hexadec-2-enoyl carnitine	https://hmdb.ca/metabolites/HMDB0006317	Exogenous,Endogenous
L-Palmitoylcarnitine	m360	HMDB0000222	C02990		rppos	C23H45NO4	1	Fatty Acyls	Lipids and lipid-like molecules	L-Palmitoylcarnitine	https://hmdb.ca/metabolites/HMDB0000222	Exogenous,Endogenous
Gamma-linolenyl carnitine	m361	HMDB0006318			rppos	C25H43NO4	2	Fatty Acyls	Lipids and lipid-like molecules	Gamma-linolenyl carnitine	https://hmdb.ca/metabolites/HMDB0006318	Exogenous
Linoelaidyl carnitine	m362	HMDB0006461			rppos	C25H45NO4	2	Fatty Acyls	Lipids and lipid-like molecules	Linoelaidyl carnitine	https://hmdb.ca/metabolites/HMDB0006461	Exogenous,Endogenous
Oleoylcarnitine	m363	HMDB0005065			rppos	C25H47NO4	2	Fatty Acyls	Lipids and lipid-like molecules	Oleoylcarnitine	https://hmdb.ca/metabolites/HMDB0005065
Stearoylcarnitine	m364	HMDB0000848			rppos	C25H49NO4	2	Fatty Acyls	Lipids and lipid-like molecules	Stearoylcarnitine	https://hmdb.ca/metabolites/HMDB0000848
Arachidonoylcarnitine	m365	HMDB0006455			rppos	C27H45NO4	2	Fatty Acyls	Lipids and lipid-like molecules	Arachidonoylcarnitine	https://hmdb.ca/metabolites/HMDB0006455
N-(1-Deoxy-1-fructosyl)leucine	m366	HMDB0037840			rppos	C12H23NO7	2	Carboxylic acids and derivatives	Organic acids and derivatives	N-(1-Deoxy-1-fructosyl)leucine	https://hmdb.ca/metabolites/HMDB0037840	Exogenous
N-(1-Deoxy-1-fructosyl)isoleucine	m367	HMDB0039780			rppos	C12H23NO7	2	Organooxygen compounds	Organic oxygen compounds	N-(1-Deoxy-1-fructosyl)isoleucine	https://hmdb.ca/metabolites/HMDB0039780
(-)-Aspidospermine	m368	HMDB0030361	C09042		rppos	C22H30N2O2	2	Aspidospermatan-type alkaloids	Alkaloids	(-)-Aspidospermine	https://hmdb.ca/metabolites/HMDB0030361	Exogenous,Endogenous
Barucainide	m369	HMDB0248876			rppos	C22H30N2O2	2	Organooxygen compounds	Organic oxygen compounds	Barucainide	https://hmdb.ca/metabolites/HMDB0248876
Urea	m370	HMDB0000294	C00086		rppos	CH4N2O	1	Organic carbonic acids and derivatives	Organic acids and derivatives	Urea	https://hmdb.ca/metabolites/HMDB0000294	Exogenous,Endogenous
Glycine	m371	HMDB0000123	C00037		rppos	C2H5NO2	1	Carboxylic acids and derivatives	Organic acids and derivatives	Glycine	https://hmdb.ca/metabolites/HMDB0000123	Exogenous,Endogenous
Taurine	m372	HMDB0000251	C00245		rppos	C2H7NO3S	1	Organic sulfonic acids and derivatives	Organic acids and derivatives	Taurine	https://hmdb.ca/metabolites/HMDB0000251	Exogenous,Endogenous
L-Alanine	m373	HMDB0000161	C00041		rppos	C3H7NO2	1	Carboxylic acids and derivatives	Organic acids and derivatives	L-Alanine	https://hmdb.ca/metabolites/HMDB0000161	Exogenous,Endogenous
Sarcosine	m374	HMDB0000271	C00213		rppos	C3H7NO2	1	Carboxylic acids and derivatives	Organic acids and derivatives	Sarcosine	https://hmdb.ca/metabolites/HMDB0000271	Exogenous
Creatinine	m375	HMDB0000562	C00791		rppos	C4H7N3O	1	Carboxylic acids and derivatives	Organic acids and derivatives	Creatinine	https://hmdb.ca/metabolites/HMDB0000562	Exogenous,Endogenous
Hsl	m376	HMDB0029387	C02926		rppos	C4H7NO2	2	Carboxylic acids and derivatives	Organic acids and derivatives	L-3-Aminodihydro-2(3H)-furanone	https://hmdb.ca/metabolites/HMDB0029387	Exogenous,Endogenous
L-Aspartic acid	m377	HMDB0000191	C00049		rppos	C4H7NO4	1	Carboxylic acids and derivatives	Organic acids and derivatives	L-Aspartic acid	https://hmdb.ca/metabolites/HMDB0000191
Creatine	m378	HMDB0000064	C00300		rppos	C4H9N3O2	1	Carboxylic acids and derivatives	Organic acids and derivatives	Creatine	https://hmdb.ca/metabolites/HMDB0000064	Exogenous,Endogenous
gamma-Aminobutyric acid	m379	HMDB0000112	C00334		rppos	C4H9NO2	2	Carboxylic acids and derivatives	Organic acids and derivatives	gamma-Aminobutyric acid	https://hmdb.ca/metabolites/HMDB0000112	Exogenous
L-Threonine	m380	HMDB0000167	C00188		rppos	C4H9NO3	1	Carboxylic acids and derivatives	Organic acids and derivatives	L-Threonine	https://hmdb.ca/metabolites/HMDB0000167	Exogenous,Endogenous
S-Methyl-L-cysteinesulfoxide	m381	HMDB0029432			rppos	C4H9NO3S	1	Carboxylic acids and derivatives	Organic acids and derivatives	S-Methyl-L-cysteinesulfoxide	https://hmdb.ca/metabolites/HMDB0029432
4-Guanidinobutanoic acid	m382	HMDB0003464	C01035		rppos	C5H11N3O2	2	Carboxylic acids and derivatives	Organic acids and derivatives	4-Guanidinobutanoic acid	https://hmdb.ca/metabolites/HMDB0003464	Exogenous
Betaine	m383	HMDB0000043	C00719		rppos	C5H11NO2	1	Carboxylic acids and derivatives	Organic acids and derivatives	Betaine	https://hmdb.ca/metabolites/HMDB0000043	Exogenous,Endogenous
L-Methionine	m384	HMDB0000696	C00073		rppos	C5H11NO2S	1	Carboxylic acids and derivatives	Organic acids and derivatives	L-Methionine	https://hmdb.ca/metabolites/HMDB0000696	Exogenous,Endogenous
Methionine sulfoxide	m385	HMDB0002005	C02989		rppos	C5H11NO3S	1	Carboxylic acids and derivatives	Organic acids and derivatives	Methionine sulfoxide	https://hmdb.ca/metabolites/HMDB0002005	Exogenous
Methionine sulfone	m386	HMDB0062174			rppos	C5H11NO4S	1	Carboxylic acids and derivatives	Organic acids and derivatives	Methionine sulfone	https://hmdb.ca/metabolites/HMDB0062174	Exogenous
Ornithine	m387	HMDB0000214	C00077		rppos	C5H12N2O2	2	Carboxylic acids and derivatives	Organic acids and derivatives	Ornithine	https://hmdb.ca/metabolites/HMDB0000214	Exogenous,Endogenous
Pyroglutamine	m388	HMDB0062558			rppos	C5H8N2O2	2	Carboxylic acids and derivatives	Organic acids and derivatives	Pyroglutamine	https://hmdb.ca/metabolites/HMDB0062558
L-Proline	m389	HMDB0000162	C00148		rppos	C5H9NO2	1	Carboxylic acids and derivatives	Organic acids and derivatives	L-Proline	https://hmdb.ca/metabolites/HMDB0000162	Exogenous,Endogenous
4-Hydroxyproline	m390	HMDB0000725	C01157		rppos	C5H9NO3	1	Carboxylic acids and derivatives	Organic acids and derivatives	4-Hydroxyproline	https://hmdb.ca/metabolites/HMDB0000725
L-Glutamic acid	m391	HMDB0000148	C00025		rppos	C5H9NO4	1	Carboxylic acids and derivatives	Organic acids and derivatives	L-Glutamic acid	https://hmdb.ca/metabolites/HMDB0000148	Exogenous,Endogenous
Pipecolic acid	m392	HMDB0000070	C00408		rppos	C6H11NO2	2	Carboxylic acids and derivatives	Organic acids and derivatives	Pipecolic acid	https://hmdb.ca/metabolites/HMDB0000070
3-Pyrrolidineacetic acid	m393	HMDB0247562			rppos	C6H11NO2	2	Pyrrolidines	Organoheterocyclic compounds	3-Pyrrolidineacetic acid	https://hmdb.ca/metabolites/HMDB0247562
trans-S-(1-Propenyl)-L-cysteine	m394	HMDB0029440			rppos	C6H11NO2S	2	Carboxylic acids and derivatives	Organic acids and derivatives	trans-S-(1-Propenyl)-L-cysteine	https://hmdb.ca/metabolites/HMDB0029440	Exogenous
L-Cystine	m395	HMDB0000192	C00491		rppos	C6H12N2O4S2	1	Carboxylic acids and derivatives	Organic acids and derivatives	L-Cystine	https://hmdb.ca/metabolites/HMDB0000192	Exogenous
Citrulline	m396	HMDB0000904	C00327		rppos	C6H13N3O3	1	Carboxylic acids and derivatives	Organic acids and derivatives	Citrulline	https://hmdb.ca/metabolites/HMDB0000904	Exogenous
L-Isoleucine	m397	HMDB0000172	C00407		rppos	C6H13NO2	1	Carboxylic acids and derivatives	Organic acids and derivatives	L-Isoleucine	https://hmdb.ca/metabolites/HMDB0000172
L-Arginine	m398	HMDB0000517	C00062		rppos	C6H14N4O2	1	Carboxylic acids and derivatives	Organic acids and derivatives	L-Arginine	https://hmdb.ca/metabolites/HMDB0000517	Exogenous,Endogenous
g-methylene glutamate	m399	HMDB0029433	C00651		rppos	C6H9NO4	2	Carboxylic acids and derivatives	Organic acids and derivatives	L-2-Amino-4-methylenepentanedioic acid	https://hmdb.ca/metabolites/HMDB0029433	Exogenous,Endogenous
1-Methylhistidine	m400	HMDB0000001	C01152		rppos	C7H11N3O2	1	Carboxylic acids and derivatives	Organic acids and derivatives	1-Methylhistidine	https://hmdb.ca/metabolites/HMDB0000001	Exogenous
N-Acetylglutamine	m401	HMDB0006029			rppos	C7H12N2O4	1	Carboxylic acids and derivatives	Organic acids and derivatives	N-Acetylglutamine	https://hmdb.ca/metabolites/HMDB0006029	Exogenous,Endogenous
Proline betaine	m402	HMDB0004827	C10172		rppos	C7H13NO2	2	Carboxylic acids and derivatives	Organic acids and derivatives	Proline betaine	https://hmdb.ca/metabolites/HMDB0004827	Exogenous,Endogenous
Isovalerylglycine	m403	HMDB0000678			rppos	C7H13NO3	1	Carboxylic acids and derivatives	Organic acids and derivatives	Isovalerylglycine	https://hmdb.ca/metabolites/HMDB0000678	Exogenous,Endogenous
Valylglycine	m404	HMDB0029127			rppos	C7H14N2O3	2	Carboxylic acids and derivatives	Organic acids and derivatives	Valylglycine	https://hmdb.ca/metabolites/HMDB0029127	Exogenous
N2-Acetylornithine	m405	HMDB0003357	C00437		rppos	C7H14N2O3	1	Carboxylic acids and derivatives	Organic acids and derivatives	N2-Acetylornithine	https://hmdb.ca/metabolites/HMDB0003357	Exogenous
1-Carboxy-L-prolylglycine	m406			PubChem 71367139	rppos	C8H12N2O5	2	Carboxylic acids and derivatives	Organic acids and derivatives	1-Carboxy-L-prolylglycine
Methacholine	m407	HMDB0015654	C07471		rppos	C8H17NO2	1	Organonitrogen compounds	Organic nitrogen compounds	Methacholine	https://hmdb.ca/metabolites/HMDB0015654
Asymmetric dimethylarginine	m408	HMDB0001539	C03626		rppos	C8H18N4O2	2	Carboxylic acids and derivatives	Organic acids and derivatives	Asymmetric dimethylarginine	https://hmdb.ca/metabolites/HMDB0001539	Exogenous,Endogenous
L-N-(3-Carboxypropyl)glutamine	m409	HMDB0029393			rppos	C9H16N2O5	2	Carboxylic acids and derivatives	Organic acids and derivatives	L-N-(3-Carboxypropyl)glutamine	https://hmdb.ca/metabolites/HMDB0029393	Exogenous,Endogenous
Leucylalanine	m410	HMDB0028922			rppos	C9H18N2O3	2	Carboxylic acids and derivatives	Organic acids and derivatives	Leucylalanine	https://hmdb.ca/metabolites/HMDB0028922	Exogenous
N6,N6,N6-Trimethyl-L-lysine	m411	HMDB0001325	C03793		rppos	C9H20N2O2	1	Carboxylic acids and derivatives	Organic acids and derivatives	N6,N6,N6-Trimethyl-L-lysine	https://hmdb.ca/metabolites/HMDB0001325	Exogenous,Endogenous
Tyrosine methylester	m412	HMDB0029217	C03404		rppos	C10H13NO3	2	Carboxylic acids and derivatives	Organic acids and derivatives	Tyrosine methylester	https://hmdb.ca/metabolites/HMDB0029217
L-a-Amino-1H-pyrrole-1-hexanoate	m413	HMDB0040551			rppos	C10H16N2O2	2	Carboxylic acids and derivatives	Organic acids and derivatives	L-alpha-Amino-1H-pyrrole-1-hexanoic acid	https://hmdb.ca/metabolites/HMDB0040551	Exogenous,Endogenous
2-Isopropyl-3,5-dimethoxy-6-methylpyrazine	m414	HMDB0029741			rppos	C10H16N2O2	2	Diazines	Organoheterocyclic compounds	2-Isopropyl-3,5-dimethoxy-6-methylpyrazine	https://hmdb.ca/metabolites/HMDB0029741	Exogenous,Endogenous
Prolylhydroxyproline	m415	HMDB0006695			rppos	C10H16N2O4	2	Carboxylic acids and derivatives	Organic acids and derivatives	Prolylhydroxyproline	https://hmdb.ca/metabolites/HMDB0006695	Exogenous,Endogenous
N-gamma-Glutamylglutamine	m416	HMDB0029147			rppos	C10H17N3O6	2	Carboxylic acids and derivatives	Organic acids and derivatives	N-gamma-Glutamylglutamine	https://hmdb.ca/metabolites/HMDB0029147	Exogenous
Leucylproline	m417	HMDB0011175			rppos	C11H20N2O3	2	Carboxylic acids and derivatives	Organic acids and derivatives	Leucylproline	https://hmdb.ca/metabolites/HMDB0011175	Exogenous,Endogenous
Valylisoleucine	m418	HMDB0029130			rppos	C11H22N2O3	2	Carboxylic acids and derivatives	Organic acids and derivatives	Valylisoleucine	https://hmdb.ca/metabolites/HMDB0029130	Exogenous
Valylleucine	m419	HMDB0029131			rppos	C11H22N2O3	2	Carboxylic acids and derivatives	Organic acids and derivatives	Valylleucine	https://hmdb.ca/metabolites/HMDB0029131	Exogenous
N-Methyl-1H-indole-3-propanamide	m420	HMDB0032756			rppos	C12H14N2O	2	Indoles and derivatives	Organoheterocyclic compounds	N-Methyl-1H-indole-3-propanamide	https://hmdb.ca/metabolites/HMDB0032756	Exogenous,Endogenous
5-Methoxytryptophan	m421	HMDB0002339			rppos	C12H14N2O3	2	Indoles and derivatives	Organoheterocyclic compounds	5-Methoxytryptophan	https://hmdb.ca/metabolites/HMDB0002339	Exogenous,Endogenous
Alanyl-Tyrosine	m422	HMDB0304776			rppos	C12H16N2O4	2	Carboxylic acids and derivatives	Organic acids and derivatives	Alanyl-Tyrosine	https://hmdb.ca/metabolites/HMDB0304776	Exogenous
Seryltyrosine	m423	HMDB0029051			rppos	C12H16N2O5	2	Carboxylic acids and derivatives	Organic acids and derivatives	Seryltyrosine	https://hmdb.ca/metabolites/HMDB0029051	Exogenous
Tyrosyl-Serine	m424	HMDB0029114			rppos	C12H16N2O5	2	Carboxylic acids and derivatives	Organic acids and derivatives	Tyrosyl-Serine	https://hmdb.ca/metabolites/HMDB0029114	Exogenous
Leucylleucine	m425	HMDB0028933	C11332		rppos	C12H24N2O3	2	Carboxylic acids and derivatives	Organic acids and derivatives	Leucylleucine	https://hmdb.ca/metabolites/HMDB0028933	Exogenous
cyclo(pro-tyr)	m426	HMDB0341304			rppos	C14H16N2O3	2	Carboxylic acids and derivatives	Organic acids and derivatives	cyclo(pro-tyr)	https://hmdb.ca/metabolites/HMDB0341304
Lenticin	m427	HMDB0061115	C09213		rppos	C14H18N2O2	1	Carboxylic acids and derivatives	Organic acids and derivatives	Lenticin	https://hmdb.ca/metabolites/HMDB0061115
Tyrosylhydroxyproline	m428	HMDB0029106			rppos	C14H18N2O5	2	Carboxylic acids and derivatives	Organic acids and derivatives	Tyrosylhydroxyproline	https://hmdb.ca/metabolites/HMDB0029106	Exogenous
Glutamylphenylalanine	m429	HMDB0029156			rppos	C14H18N2O5	2	Carboxylic acids and derivatives	Organic acids and derivatives	Glutamylphenylalanine	https://hmdb.ca/metabolites/HMDB0029156
Succinyl-leucyl-agmatine	m430			PubChem 3036000	rppos	C15H29N5O4	2	Carboxylic acids and derivatives	Organic acids and derivatives	Succinyl-leucyl-agmatine
gamma-Glutamyltryptophan	m431	HMDB0029160			rppos	C16H19N3O5	2	Carboxylic acids and derivatives	Organic acids and derivatives	gamma-Glutamyltryptophan	https://hmdb.ca/metabolites/HMDB0029160
Tryptophyl-Isoleucine	m432	HMDB0029086			rppos	C17H23N3O3	2	Carboxylic acids and derivatives	Organic acids and derivatives	Tryptophyl-Isoleucine	https://hmdb.ca/metabolites/HMDB0029086	Exogenous
Tryptophyl-Leucine	m433	HMDB0029087			rppos	C17H23N3O3	2	Carboxylic acids and derivatives	Organic acids and derivatives	Tryptophyl-Leucine	https://hmdb.ca/metabolites/HMDB0029087	Exogenous
Tyrosyl-Phenylalanine	m434	HMDB0029112			rppos	C18H20N2O4	2	Carboxylic acids and derivatives	Organic acids and derivatives	Tyrosyl-Phenylalanine	https://hmdb.ca/metabolites/HMDB0029112	Exogenous
Tryptophyl-Phenylalanine	m435	HMDB0029090			rppos	C20H21N3O3	2	Carboxylic acids and derivatives	Organic acids and derivatives	Tryptophyl-Phenylalanine	https://hmdb.ca/metabolites/HMDB0029090	Exogenous
Dynorphin B (10-13)	m436	HMDB0012936			rppos	C20H39N5O6	2	Carboxylic acids and derivatives	Organic acids and derivatives	Dynorphin B (10-13)	https://hmdb.ca/metabolites/HMDB0012936	Endogenous
Tryptophyl-Tryptophan	m437	HMDB0029094			rppos	C22H22N4O3	2	Carboxylic acids and derivatives	Organic acids and derivatives	Tryptophyl-Tryptophan	https://hmdb.ca/metabolites/HMDB0029094
Isomer of Tryptophyl-Tryptophan	m438				rppos	C22H22N4O3	3	Carboxylic acids and derivatives	Organic acids and derivatives	Isomer of Tryptophyl-Tryptophan
Arg Trp Cys His	m439			METLIN 222705	rppos	C26H36N10O5S	2	Carboxylic acids and derivatives	Organic acids and derivatives	Arg Trp Cys His
Dehydroanonaine	m440	HMDB0030350			rppos	C17H13NO2	2	Aporphines	Alkaloids	Dehydroanonaine	https://hmdb.ca/metabolites/HMDB0030350	Exogenous,Endogenous
Didesipramine	m441	HMDB0251223			rppos	C17H20N2	2	Benzazepines	Organoheterocyclic compounds	Didesipramine	https://hmdb.ca/metabolites/HMDB0251223
Phenacemide	m442	HMDB0015253	C07428		rppos	C9H10N2O2	2	Benzene and substituted derivatives	Benzenoids	Phenacemide	https://hmdb.ca/metabolites/HMDB0015253	Exogenous
Ethyl Phenylglyoxylate	m443	HMDB0062729			rppos	C10H10O3	2	Benzene and substituted derivatives	Benzenoids	Ethyl Phenylglyoxylate	https://hmdb.ca/metabolites/HMDB0062729
4-Ethoxy-3-anisaldehyde	m444	HMDB0029685			rppos	C10H12O3	2	Benzene and substituted derivatives	Benzenoids	4-Ethoxy-3-methoxybenzaldehyde	https://hmdb.ca/metabolites/HMDB0029685	Exogenous,Endogenous
TELMISARTAN	m445	HMDB0015101	C07710		rppos	C33H30N4O2	2	Benzene and substituted derivatives	Benzenoids	TELMISARTAN	https://hmdb.ca/metabolites/HMDB0015101
4-(3-Methyl-5-oxo-4,5-dihydro-1H-pyrazol-1-yl)benzoic acid	m446			PubChem 109029	rppos	C11H10N2O3	2	Carboxylic acids and derivatives	Organic acids and derivatives	4-(3-Methyl-5-oxo-4,5-dihydro-1H-pyrazol-1-yl)benzoic acid
3-Amino-9-ethylcarbazole	m447	HMDB0245810			rppos	C14H14N2	2	Indoles and derivatives	Organoheterocyclic compounds	3-Amino-9-ethylcarbazole	https://hmdb.ca/metabolites/HMDB0245810
Dillapiol	m448	HMDB0030725	C10449		rppos	C12H14O4	2	Benzodioxoles	Organoheterocyclic compounds	Dillapiol	https://hmdb.ca/metabolites/HMDB0030725	Exogenous,Endogenous
Dihydroactinidiolide	m449	HMDB0035240			rppos	C11H16O2	2	Benzofurans	Organoheterocyclic compounds	Dihydroactinidiolide	https://hmdb.ca/metabolites/HMDB0035240	Exogenous
Benzyl salicylate	m450	HMDB0029818			rppos	C14H12O3	2	Benzene and substituted derivatives	Benzenoids	Benzyl salicylate	https://hmdb.ca/metabolites/HMDB0029818	Exogenous,Endogenous
Resveratrol	m451	HMDB0003747	C03582		rppos	C14H12O3	1	Stilbenes	Phenylpropanoids and polyketides	Resveratrol	https://hmdb.ca/metabolites/HMDB0003747
2-Aminobenzoic acid	m452	HMDB0001123	C00108		rppos	C7H7NO2	2	Benzene and substituted derivatives	Benzenoids	2-Aminobenzoic acid	https://hmdb.ca/metabolites/HMDB0001123	Exogenous,Endogenous
3-Pyridylacetic acid	m453	HMDB0001538			rppos	C7H7NO2	1	Pyridines and derivatives	Organoheterocyclic compounds	3-Pyridylacetic acid	https://hmdb.ca/metabolites/HMDB0001538	Exogenous,Endogenous
Methyl gallate	m454	HMDB0254590			rppos	C8H8O5	1	Benzene and substituted derivatives	Benzenoids	Methyl gallate	https://hmdb.ca/metabolites/HMDB0254590	Exogenous
1-(2-Benzoylphenyl)-1,3-dimethylurea	m455			PubChem 90994944	rppos	C16H16N2O2	2	Benzophenones	Benzenoids	1-(2-Benzoylphenyl)-1,3-dimethylurea
3'-carboxy-alpha-chromanol	m456	HMDB0062349			rppos	C9H10O2	2	Benzopyrans	Organoheterocyclic compounds	3'-carboxy-alpha-chromanol	https://hmdb.ca/metabolites/HMDB0062349
Coclaurine	m457	HMDB0303359	C06348		rppos	C17H19NO3	2	Isoquinolines and derivatives	Organoheterocyclic compounds	Coclaurine	https://hmdb.ca/metabolites/HMDB0303359
Erysodine	m458	HMDB0030255			rppos	C17H19NO3	2	Erythrina alkaloids	Alkaloids	Erysodine	https://hmdb.ca/metabolites/HMDB0030255	Exogenous,Endogenous
Norcodeine	m459	HMDB0060657	C16576		rppos	C17H19NO3	2	Morphinans	Alkaloids	Norcodeine	https://hmdb.ca/metabolites/HMDB0060657
Glycodeoxycholate	m460	HMDB0000631	C05464		rppos	C26H43NO5	1	Steroids and steroid derivatives	Lipids and lipid-like molecules	Deoxycholic acid glycine conjugate	https://hmdb.ca/metabolites/HMDB0000631	Exogenous,Endogenous
7-Hoca	m461	HMDB0012458	C17337		rppos	C27H42O4	2	Steroids and steroid derivatives	Lipids and lipid-like molecules	7alpha-Hydroxy-3-oxo-4-cholestenoate	https://hmdb.ca/metabolites/HMDB0012458
Glycerol	m462	HMDB0000131	C00116		rppos	C3H8O3	1	Organooxygen compounds	Organic oxygen compounds	Glycerol	https://hmdb.ca/metabolites/HMDB0000131	Exogenous,Endogenous
D-1-Deoxy-erythro-hexo-2,3-diulose	m463	HMDB0029934			rppos	C6H10O5	2	Organooxygen compounds	Organic oxygen compounds	D-1-Deoxy-erythro-hexo-2,3-diulose	https://hmdb.ca/metabolites/HMDB0029934	Exogenous,Endogenous
Glucose/Mannose/Galactose	m464	?HMDB0000122			rppos	C6H12O6	1	Organooxygen compounds	Organic oxygen compounds	D-Glucose	https://hmdb.ca/metabolites/HMDB0000122	Exogenous,Endogenous
2-Deoxygalactopyranose	m465	HMDB0012327	C02781		rppos	C6H12O5	2	Organooxygen compounds	Organic oxygen compounds	2-Deoxygalactopyranose	https://hmdb.ca/metabolites/HMDB0012327	Exogenous,Endogenous
Reduced nicotinamide riboside	m466	HMDB0011648	C15497		rppos	C11H16N2O5	2	Organooxygen compounds	Organic oxygen compounds	1-(beta-D-Ribofuranosyl)-1,4-dihydronicotinamide	https://hmdb.ca/metabolites/HMDB0011648	Exogenous,Endogenous
Phlorin	m467	HMDB0035589			rppos	C12H16O8	2	Organooxygen compounds	Organic oxygen compounds	Phlorin	https://hmdb.ca/metabolites/HMDB0035589	Exogenous,Endogenous
Lactose	m468	HMDB0000186	C00243		rppos	C12H22O11	1	Organooxygen compounds	Organic oxygen compounds	Alpha-Lactose	https://hmdb.ca/metabolites/HMDB0000186
Netilmicin	m469	HMDB0015090	C07657		rppos	C21H41N5O7	2	Organooxygen compounds	Organic oxygen compounds	Netilmicin	https://hmdb.ca/metabolites/HMDB0015090
1-(2-Pyridinylmethyl)-3-piperidinecarboxylic acid	m470			PubChem 3575667	rppos	C12H16N2O2	2	Benzene and substituted derivatives	Benzenoids	1-(pyridin-2-ylmethyl)piperidine-3-carboxylic acid
2-hydroxy-3-[4-hydroxy-3-(3-methylbut-2-en-1-yl)phenyl]propanoic acid	m471			PubChem 131837132	rppos	C14H18O4	2	Hydroxy acids and derivatives	Organic acids and derivatives	2-hydroxy-3-[4-hydroxy-3-(3-methylbut-2-en-1-yl)phenyl]propanoic acid	https://pubchem.ncbi.nlm.nih.gov/compound/131837132
g-Butyrobetaine	m472	HMDB0001161	C01181		rppos	C7H15NO2	2	Fatty Acyls	Lipids and lipid-like molecules	4-Trimethylammoniobutanoic acid	https://hmdb.ca/metabolites/HMDB0001161
Acetylcholine	m473	HMDB0000895	C01996		rppos	C7H15NO2	1	Organonitrogen compounds	Organic nitrogen compounds	Acetylcholine	https://hmdb.ca/metabolites/HMDB0000895	Exogenous
17-Hydroxylinolenic acid	m474	HMDB0011108	C16346		rppos	C18H30O3	2	Fatty Acyls	Lipids and lipid-like molecules	17-Hydroxylinolenic acid	https://hmdb.ca/metabolites/HMDB0011108	Exogenous
N-Palmitoyl Glutamine	m475	HMDB0241924			rppos	C21H40N2O4	2	Fatty Acyls	Lipids and lipid-like molecules	N-Palmitoyl Glutamine	https://hmdb.ca/metabolites/HMDB0241924
Oleamide	m476	HMDB0002117	C19670		rppos	C18H35NO	1	Fatty Acyls	Lipids and lipid-like molecules	Oleamide	https://hmdb.ca/metabolites/HMDB0002117	Exogenous
Dimethylmatairesinol	m477	HMDB0303467			rppos	C22H26O6	2	Furanoid lignans	Unknown	Dimethylmatairesinol	https://hmdb.ca/metabolites/HMDB0303467	Exogenous
Perlolyrine	m478	HMDB0030327	C09231		rppos	C16H12N2O2	2	Harmala alkaloids	Alkaloids	Perlolyrine	https://hmdb.ca/metabolites/HMDB0030327	Exogenous,Endogenous
Ninhydrin	m479	HMDB0255614			rppos	C9H6O4	2	Indanes	Benzenoids	Ninhydrin	https://hmdb.ca/metabolites/HMDB0255614
Indole-3-methanamine	m480	HMDB0029740			rppos	C9H10N2	2	Indoles and derivatives	Organoheterocyclic compounds	Indole-3-methanamine	https://hmdb.ca/metabolites/HMDB0029740	Exogenous,Endogenous
Serotonin	m481	HMDB0000259	C00780		rppos	C10H12N2O	1	Indoles and derivatives	Organoheterocyclic compounds	Serotonin	https://hmdb.ca/metabolites/HMDB0000259	Exogenous,Endogenous
Indole-3-methyl acetate	m482	HMDB0029738	C20635		rppos	C11H11NO2	2	Indoles and derivatives	Organoheterocyclic compounds	Indole-3-methyl acetate	https://hmdb.ca/metabolites/HMDB0029738	Exogenous,Endogenous
9H-Carbazole-3-carboxaldehyde	m483	HMDB0029743			rppos	C13H9NO	2	Indoles and derivatives	Organoheterocyclic compounds	9H-Carbazole-3-carboxaldehyde	https://hmdb.ca/metabolites/HMDB0029743	Exogenous,Endogenous
Mukonidine	m484	HMDB0030214			rppos	C14H11NO3	2	Indoles and derivatives	Organoheterocyclic compounds	Mukonidine	https://hmdb.ca/metabolites/HMDB0030214	Exogenous,Endogenous
Indigo	m485	HMDB0240742			rppos	C16H10N2O2	2	Indoles and derivatives	Organoheterocyclic compounds	Indigo	https://hmdb.ca/metabolites/HMDB0240742
Glycerophosphocholine	m486	HMDB0000086	C00670		rppos	C8H20NO6P	1	Glycerophospholipids	Lipids and lipid-like molecules	Glycerophosphocholine	https://hmdb.ca/metabolites/HMDB0000086
sn1 LysoPC(14:0)	m487	HMDB0010379			rppos	C22H46NO7P	2	Glycerophospholipids	Lipids and lipid-like molecules	LysoPC(14:0/0:0)	https://hmdb.ca/metabolites/HMDB0010379	Exogenous,Endogenous
sn2 LysoPC(15:0)	m488			PubChem 165415602	rppos	C23H48NO7P	2	Glycerophospholipids	Lipids and lipid-like molecules	sn2 LysoPC(15:0)
sn1 LysoPC(15:0)	m489	HMDB0010381			rppos	C23H48NO7P	2	Glycerophospholipids	Lipids and lipid-like molecules	LysoPC(15:0/0:0)	https://hmdb.ca/metabolites/HMDB0010381
sn2 LysoPC(16:1)	m490	HMDB0245288			rppos	C24H48NO7P	2	Glycerophospholipids	Lipids and lipid-like molecules	sn2 LysoPC(16:1)	https://hmdb.ca/metabolites/HMDB0245288
sn1 LysoPC(16:1)	m491	HMDB0010383			rppos	C24H48NO7P	2	Glycerophospholipids	Lipids and lipid-like molecules	LysoPC(16:1(9Z)/0:0)	https://hmdb.ca/metabolites/HMDB0010383	Exogenous
LysoPC(P-16:0/0:0)	m492	HMDB0010407			rppos	C24H50NO6P	2	Glycerophospholipids	Lipids and lipid-like molecules	LysoPC(P-16:0/0:0)	https://hmdb.ca/metabolites/HMDB0010407
sn1 LysoPC(16:0e)	m493	HMDB0243890	C13903		rppos	C24H52NO6P	2	Glycerophospholipids	Lipids and lipid-like molecules	1-O-Hexadecyl-sn-glycero-3-phosphocholine	https://hmdb.ca/metabolites/HMDB0243890
LysoPC(17:1)	m494			LMGP01050002	rppos	C25H50NO7P	2	Glycerophospholipids	Lipids and lipid-like molecules	LysoPC(17:1)
sn2 LysoPC(17:0)	m495			PubChem 165415680	rppos	C25H52NO7P	2	Glycerophospholipids	Lipids and lipid-like molecules	sn2 LysoPC(17:0)
sn1 LysoPC(17:0)	m496	HMDB0012108			rppos	C25H52NO7P	1	Glycerophospholipids	Lipids and lipid-like molecules	sn1 LysoPC(17:0)	https://hmdb.ca/metabolites/HMDB0012108	Exogenous,Endogenous
sn2 LysoPC(18:3)	m497			PubChem 134777355	rppos	C26H48NO7P	2	Glycerophospholipids	Lipids and lipid-like molecules	sn2 LysoPC(18:3)
sn1 LysoPC(18:3)	m498	HMDB0010387			rppos	C26H48NO7P	2	Glycerophospholipids	Lipids and lipid-like molecules	sn1 LysoPC(18:3)	https://hmdb.ca/metabolites/HMDB0010387	Exogenous
sn2 LysoPC(18:2)	m499	HMDB0061700			rppos	C26H50NO7P	2	Glycerophospholipids	Lipids and lipid-like molecules	LysoPC(0:0/18:2(9Z,12Z))	https://hmdb.ca/metabolites/HMDB0061700
sn2 LysoPC(18:0)	m500	HMDB0011128			rppos	C26H54NO7P	2	Glycerophospholipids	Lipids and lipid-like molecules	sn2 LysoPC(18:0)	https://hmdb.ca/metabolites/HMDB0011128	Exogenous,Endogenous
sn1 LysoPC(18:0)	m501	HMDB0010384			rppos	C26H54NO7P	2	Glycerophospholipids	Lipids and lipid-like molecules	sn1 LysoPC(18:0)	https://hmdb.ca/metabolites/HMDB0010384
sn2 LysoPC(20:5)	m502			PubChem 71316309	rppos	C28H48NO7P	2	Glycerophospholipids	Lipids and lipid-like molecules	sn2 LysoPC(20:5)
sn1 LysoPC(20:5)	m503	HMDB0010397			rppos	C28H48NO7P	2	Glycerophospholipids	Lipids and lipid-like molecules	LysoPC(20:5(5Z,8Z,11Z,14Z,17Z)/0:0)	https://hmdb.ca/metabolites/HMDB0010397	Exogenous
sn2 LysoPC(20:4)	m504	HMDB0061699			rppos	C28H50NO7P	2	Glycerophospholipids	Lipids and lipid-like molecules	sn2 LysoPC(20:4)	https://hmdb.ca/metabolites/HMDB0061699
sn1 LysoPC(20:4)	m505	HMDB0010395			rppos	C28H50NO7P	2	Glycerophospholipids	Lipids and lipid-like molecules	sn1 LysoPC(20:4)	https://hmdb.ca/metabolites/HMDB0010395	Exogenous
sn2 LysoPC(20:3)	m506			PubChem 165415738	rppos	C28H52NO7P	2	Glycerophospholipids	Lipids and lipid-like molecules	LPC(0:0/20:3)	https://pubchem.ncbi.nlm.nih.gov/compound/165415738
sn1 LysoPC(20:3)	m507	HMDB0010393			rppos	C28H52NO7P	2	Glycerophospholipids	Lipids and lipid-like molecules	LysoPC(20:3(5Z,8Z,11Z)/0:0)	https://hmdb.ca/metabolites/HMDB0010393	Exogenous
sn2 LysoPC(22:6)	m508			PubChem 71768157	rppos	C30H50NO7P	2	Glycerophospholipids	Lipids and lipid-like molecules	LPC(0:0/22:6)	https://pubchem.ncbi.nlm.nih.gov/compound/71768157
sn1 LysoPC(22:6)	m509	HMDB0010404			rppos	C30H50NO7P	2	Glycerophospholipids	Lipids and lipid-like molecules	LysoPC(22:6(4Z,7Z,10Z,13Z,16Z,19Z)/0:0)	https://hmdb.ca/metabolites/HMDB0010404
sn2 LysoPC(22:5)	m510			PubChem 165415626	rppos	C30H52NO7P	2	Glycerophospholipids	Lipids and lipid-like molecules	sn2 LysoPC(22:5)
sn1 LysoPC(22:5)	m511	HMDB0010402			rppos	C30H52NO7P	2	Glycerophospholipids	Lipids and lipid-like molecules	sn1 LysoPC(22:5)	https://hmdb.ca/metabolites/HMDB0010402
LysoPC(22:4)	m512	HMDB0010401			rppos	C30H54NO7P	2	Glycerophospholipids	Lipids and lipid-like molecules	LysoPC(22:4)	https://hmdb.ca/metabolites/HMDB0010401	Exogenous
sn2 LysoPE(17:1)	m513			PubChem 42607464	rppos	C22H44NO7P	1	Glycerophospholipids	Lipids and lipid-like molecules	LPE-C17:1	https://pubchem.ncbi.nlm.nih.gov/compound/42607464
sn1 LysoPE(18:2)	m514	HMDB0011507			rppos	C23H44NO7P	2	Glycerophospholipids	Lipids and lipid-like molecules	LysoPE(18:2(9Z,12Z)/0:0)	https://hmdb.ca/metabolites/HMDB0011507	Exogenous
sn1 LysoPE(20:4)	m515	HMDB0011517			rppos	C25H44NO7P	2	Glycerophospholipids	Lipids and lipid-like molecules	LysoPE(20:4(5Z,8Z,11Z,14Z)/0:0)	https://hmdb.ca/metabolites/HMDB0011517	Exogenous
LysoPE(20:1)	m516	HMDB0011484			rppos	C25H46NO7P	2	Glycerophospholipids	Lipids and lipid-like molecules	LysoPE(20:1)	https://hmdb.ca/metabolites/HMDB0011484	Exogenous
sn1 LysoPE(22:6)	m517	HMDB0011526			rppos	C27H44NO7P	2	Glycerophospholipids	Lipids and lipid-like molecules	LysoPE(22:6(4Z,7Z,10Z,13Z,16Z,19Z)/0:0)	https://hmdb.ca/metabolites/HMDB0011526	Exogenous
4-Amino-1-naphthol	m518			PubChem 17815	rppos	C10H9NO	2	Naphthalenes	Benzenoids	4-Amino-1-naphthol
Asperxanthone	m519	HMDB0030852			rppos	C16H14O5	2	Naphthopyrans	Organoheterocyclic compounds	Asperxanthone	https://hmdb.ca/metabolites/HMDB0030852	Exogenous,Endogenous
HB(T)	m520	HMDB0247633			rppos	C13H10N2O2	2	Diazanaphthalenes	Organoheterocyclic compounds	7-Methyl-2-(2-furyl)-1,8-naphthyridine-4(1H)-one	https://hmdb.ca/metabolites/HMDB0247633
1-Methylinosine	m521	HMDB0002721			rppos	C11H14N4O5	1	Purine nucleosides	Nucleosides	1-Methylinosine	https://hmdb.ca/metabolites/HMDB0002721	Exogenous,Endogenous
5'-Methylthioadenosine	m522	HMDB0001173	C00170		rppos	C11H15N5O3S	2	5'-deoxyribonucleosides	Nucleosides	5'-Methylthioadenosine	https://hmdb.ca/metabolites/HMDB0001173
1-Methyladenosine	m523	HMDB0003331	C02494		rppos	C11H15N5O4	1	Purine nucleosides	Nucleosides	1-Methyladenosine	https://hmdb.ca/metabolites/HMDB0003331	Exogenous,Endogenous
1-Methylguanosine	m524	HMDB0001563	C04545		rppos	C11H15N5O5	1	Purine nucleosides	Nucleosides	1-Methylguanosine	https://hmdb.ca/metabolites/HMDB0001563	Exogenous,Endogenous
2-Methylguanosine	m525	HMDB0005862			rppos	C11H15N5O5	2	Purine nucleosides	Nucleosides	2-Methylguanosine	https://hmdb.ca/metabolites/HMDB0005862	Exogenous,Endogenous
N2,N2-Dimethylguanosine	m526	HMDB0004824			rppos	C12H17N5O5	1	Purine nucleosides	Nucleosides	N2,N2-Dimethylguanosine	https://hmdb.ca/metabolites/HMDB0004824	Exogenous,Endogenous
Apronal	m527	HMDB0248536			rppos	C9H16N2O2	2	Organic carbonic acids and derivatives	Organic acids and derivatives	Apronal	https://hmdb.ca/metabolites/HMDB0248536
L-Homocysteine	m528	HMDB0000742	C00155		rppos	C4H9NO2S	1	Carboxylic acids and derivatives	Organic acids and derivatives	L-Homocysteine	https://hmdb.ca/metabolites/HMDB0000742	Exogenous
Niacinamide	m529	HMDB0001406	C00153		rppos	C6H6N2O	1	Pyridines and derivatives	Organoheterocyclic compounds	Niacinamide	https://hmdb.ca/metabolites/HMDB0001406	Exogenous,Endogenous
Trimethylamine N-oxide	m530	HMDB0000925	C01104		rppos	C3H9NO	1	Organonitrogen compounds	Organic nitrogen compounds	Trimethylamine N-oxide	https://hmdb.ca/metabolites/HMDB0000925	Exogenous,Endogenous
1-Pyrroline	m531	HMDB0012497	C15668		rppos	C4H7N	2	Pyrrolines	Organoheterocyclic compounds	1-Pyrroline	https://hmdb.ca/metabolites/HMDB0012497	Exogenous,Endogenous
Pyrrolidine	m532	HMDB0031641			rppos	C4H9N	1	Pyrrolidines	Organoheterocyclic compounds	Pyrrolidine	https://hmdb.ca/metabolites/HMDB0031641	Exogenous,Endogenous
2-Methylthiazolidine	m533	HMDB0031682			rppos	C4H9NS	2	Azolidines	Organoheterocyclic compounds	2-Methylthiazolidine	https://hmdb.ca/metabolites/HMDB0031682	Exogenous,Endogenous
Choline	m534	HMDB0000097	C00114		rppos	C5H13NO	1	Organonitrogen compounds	Organic nitrogen compounds	Choline	https://hmdb.ca/metabolites/HMDB0000097	Exogenous,Endogenous
2-Piperidinone	m535	HMDB0011749	C10482		rppos	C5H9NO	1	Piperidines	Organoheterocyclic compounds	2-Piperidinone	https://hmdb.ca/metabolites/HMDB0011749	Exogenous,Endogenous
MDMH	m536	HMDB0031670			rppos	C6H10N2O3	2	Azolidines	Organoheterocyclic compounds	1-(Hydroxymethyl)-5,5-dimethyl-2,4-imidazolidinedione	https://hmdb.ca/metabolites/HMDB0031670	Exogenous,Endogenous
L-Carnitine	m537	HMDB0000062	C00318		rppos	C7H15NO3	1	Organonitrogen compounds	Organic nitrogen compounds	L-Carnitine	https://hmdb.ca/metabolites/HMDB0000062
1,2-Diacylglycerol-LD-PI-pool	m538	HMDB0062270			rppos	C7H5NO	2	Benzene and substituted derivatives	Benzenoids	1,2-Diacylglycerol-LD-PI-pool	https://hmdb.ca/metabolites/HMDB0062270	Endogenous
2-Methylnicotinamide	m539	HMDB0059711			rppos	C7H8N2O	1	Pyridines and derivatives	Organoheterocyclic compounds	2-Methylnicotinamide	https://hmdb.ca/metabolites/HMDB0059711
N-Methyl-2-pyridone-5-carboxamide	m540	HMDB0004193	C05842		rppos	C7H8N2O2	2	Pyridines and derivatives	Organoheterocyclic compounds	N1-Methyl-2-pyridone-5-carboxamide	https://hmdb.ca/metabolites/HMDB0004193	Exogenous,Endogenous
2-(2-Butoxyethoxy)ethanol	m541	HMDB0244918			rppos	C8H18O3	2	Organooxygen compounds	Organic oxygen compounds	2-(2-Butoxyethoxy)ethanol	https://hmdb.ca/metabolites/HMDB0244918
2,4,6-THA	m542	HMDB0029644			rppos	C8H8O4	1	Organooxygen compounds	Organic oxygen compounds	2',4',6'-Trihydroxyacetophenone	https://hmdb.ca/metabolites/HMDB0029644	Exogenous,Endogenous
Vanillic acid	m543	HMDB0000484	C06672		rppos	C8H8O4	1	Benzene and substituted derivatives	Benzenoids	Vanillic acid	https://hmdb.ca/metabolites/HMDB0000484	Exogenous,Endogenous
Acetaminophen	m544	HMDB0001859	C06804		rppos	C8H9NO2	1	Phenols	Benzenoids	Acetaminophen	https://hmdb.ca/metabolites/HMDB0001859	Exogenous,Endogenous
Nornicotine	m545	HMDB0001126	C06524		rppos	C9H12N2	1	Pyridines and derivatives	Organoheterocyclic compounds	Nornicotine	https://hmdb.ca/metabolites/HMDB0001126	Exogenous,Endogenous
3-methyl-2-Quinoxalinone	m546	HMDB0341258			rppos	C9H8N2O	2	Diazanaphthalenes	Organoheterocyclic compounds	3-methyl-2-Quinoxalinone	https://hmdb.ca/metabolites/HMDB0341258
L-Kynurenine	m547	HMDB0000684	C00328		rppos	C10H12N2O3	1	Organooxygen compounds	Organic oxygen compounds	L-Kynurenine	https://hmdb.ca/metabolites/HMDB0000684	Exogenous,Endogenous
Antipyrine	m548	HMDB0015503	C13244		rppos	C11H12N2O	2	Azoles	Organoheterocyclic compounds	Antipyrine	https://hmdb.ca/metabolites/HMDB0015503
L-Formylkynurenine	m549	HMDB0060485	C02700		rppos	C11H12N2O4	2	Organooxygen compounds	Organic oxygen compounds	L-Formylkynurenine	https://hmdb.ca/metabolites/HMDB0060485
gamma-CEHC	m550	HMDB0001931			rppos	C15H20O4	2	Benzopyrans	Organoheterocyclic compounds	gamma-CEHC	https://hmdb.ca/metabolites/HMDB0001931	Exogenous
Cortisol	m551	HMDB0000063	C00735		rppos	C21H30O5	1	Steroids and steroid derivatives	Lipids and lipid-like molecules	Cortisol	https://hmdb.ca/metabolites/HMDB0000063
LysoPS(18:1)	m552	HMDB0240603			rppos	C24H46NO9P	2	Glycerophospholipids	Lipids and lipid-like molecules	LysoPS(18:1)	https://hmdb.ca/metabolites/HMDB0240603
11-[(2R,3S)-3--3,7-dihydroxy-4,4,6,8-tetramethyl-5-oxoundecanoic acid	m553	HMDB0127524			rppos	C27H44N2O6S	2	Others	Unknown	11-[(2R,3S)-3-[2-amino-3-methyl-4-(2-methyl-1,3-thiazol-4-yl)but-3-en-1-yl]-2-methyloxiran-2-yl]-3,7-dihydroxy-4,4,6,8-tetramethyl-5-oxoundecanoic acid	https://hmdb.ca/metabolites/HMDB0127524
Biliverdin	m554	HMDB0001008	C00500		rppos	C33H34N4O6	1	Tetrapyrroles and derivatives	Organoheterocyclic compounds	Biliverdin	https://hmdb.ca/metabolites/HMDB0001008	Exogenous
Neocuproine	m555	HMDB0255520			rppos	C14H12N2	2	Phenanthrolines	Organoheterocyclic compounds	Neocuproine	https://hmdb.ca/metabolites/HMDB0255520
Isoelemicin	m556	HMDB0029867	C16975		rppos	C12H16O3	2	Phenol ethers	Benzenoids	Isoelemicin	https://hmdb.ca/metabolites/HMDB0029867	Exogenous,Endogenous
N-Benzoyltyramine	m557	HMDB0029366			rppos	C15H15NO2	2	Phenols	Benzenoids	N-[2-(4-Hydroxyphenyl)ethyl]benzamide	https://hmdb.ca/metabolites/HMDB0029366	Exogenous,Endogenous
10-Dehydrogingerdione	m558	HMDB0303087			rppos	C21H30O4	2	Phenols	Benzenoids	10-Dehydrogingerdione	https://hmdb.ca/metabolites/HMDB0303087	Exogenous
Corticosterone	m559	HMDB0001547	C02140		rppos	C21H30O4	1	Steroids and steroid derivatives	Lipids and lipid-like molecules	Corticosterone	https://hmdb.ca/metabolites/HMDB0001547	Exogenous,Endogenous
Limonene aldehyde	m560	HMDB0030252			rppos	C11H18O	2	Prenol lipids	Lipids and lipid-like molecules	Limonene aldehyde	https://hmdb.ca/metabolites/HMDB0030252	Exogenous,Endogenous
Cortisone	m561	HMDB0002802	C00762		rppos	C21H28O5	1	Steroids and steroid derivatives	Lipids and lipid-like molecules	Cortisone	https://hmdb.ca/metabolites/HMDB0002802	Exogenous,Endogenous
Isopetasoside	m562	HMDB0029622			rppos	C21H32O7	2	Prenol lipids	Lipids and lipid-like molecules	Isopetasoside	https://hmdb.ca/metabolites/HMDB0029622	Exogenous,Endogenous
Foropafant	m563	HMDB0252456			rppos	C28H40N4S	2	Prenol lipids	Lipids and lipid-like molecules	Foropafant	https://hmdb.ca/metabolites/HMDB0252456
Lumichrome	m564	HMDB0254199	C01727		rppos	C12H10N4O2	2	Pteridines and derivatives	Organoheterocyclic compounds	Lumichrome	https://hmdb.ca/metabolites/HMDB0254199
Riboflavin	m565	HMDB0000244	C00255		rppos	C17H20N4O6	1	Pteridines and derivatives	Organoheterocyclic compounds	Riboflavin	https://hmdb.ca/metabolites/HMDB0000244	Exogenous,Endogenous
Adenosine	m566	HMDB0000050	C00212		rppos	C10H13N5O4	2	Purine nucleosides	Nucleosides	Adenosine	https://hmdb.ca/metabolites/HMDB0000050	Exogenous,Endogenous
GMP	m567	HMDB0001397	C00144		rppos	C10H14N5O8P	2	Purine nucleotides	Nucleosides	Guanosine monophosphate	https://hmdb.ca/metabolites/HMDB0001397	Exogenous
Oxypurinol	m568	HMDB0000786	C07599		rppos	C5H4N4O2	2	Imidazopyrimidines	Organoheterocyclic compounds	Oxypurinol	https://hmdb.ca/metabolites/HMDB0000786	Exogenous,Endogenous
Adenine	m569	HMDB0000034	C00147		rppos	C5H5N5	1	Imidazopyrimidines	Organoheterocyclic compounds	Adenine	https://hmdb.ca/metabolites/HMDB0000034	Exogenous
2-Hydroxyadenine	m570	HMDB0000403			rppos	C5H5N5O	2	Imidazopyrimidines	Organoheterocyclic compounds	2-Hydroxyadenine	https://hmdb.ca/metabolites/HMDB0000403	Exogenous,Endogenous
Guanine	m571	HMDB0000132	C00242		rppos	C5H5N5O	1	Imidazopyrimidines	Organoheterocyclic compounds	Guanine	https://hmdb.ca/metabolites/HMDB0000132	Exogenous,Endogenous
Uracil	m572	HMDB0000300	C00106		rppos	C4H4N2O2	1	Diazines	Organoheterocyclic compounds	Uracil	https://hmdb.ca/metabolites/HMDB0000300	Exogenous,Endogenous
Allopurinol	m573	HMDB0014581			rppos	C5H4N4O	1	Pyrazolopyrimidines	Organoheterocyclic compounds	Allopurinol	https://hmdb.ca/metabolites/HMDB0014581
Hypoxanthine	m574	HMDB0000157	C00262		rppos	C5H4N4O	1	Imidazopyrimidines	Organoheterocyclic compounds	Hypoxanthine	https://hmdb.ca/metabolites/HMDB0000157	Exogenous,Endogenous
Thymine	m575	HMDB0000262	C00178		rppos	C5H6N2O2	1	Diazines	Organoheterocyclic compounds	Thymine	https://hmdb.ca/metabolites/HMDB0000262	Exogenous,Endogenous
1-Methylguanine	m576	HMDB0003282	C04152		rppos	C6H7N5O	1	Imidazopyrimidines	Organoheterocyclic compounds	1-Methylguanine	https://hmdb.ca/metabolites/HMDB0003282	Exogenous
Paraxanthine	m577	HMDB0001860	C13747		rppos	C7H8N4O2	1	Imidazopyrimidines	Organoheterocyclic compounds	Paraxanthine	https://hmdb.ca/metabolites/HMDB0001860	Exogenous,Endogenous
Caffeine	m578	HMDB0001847	C07481		rppos	C8H10N4O2	2	Imidazopyrimidines	Organoheterocyclic compounds	Caffeine	https://hmdb.ca/metabolites/HMDB0001847	Exogenous,Endogenous
D-Fructosazine	m579	HMDB0035284			rppos	C12H20N2O8	2	Diazines	Organoheterocyclic compounds	D-Fructosazine	https://hmdb.ca/metabolites/HMDB0035284	Exogenous
2-Acetyl-D1-piperideine	m580	HMDB0030345			rppos	C7H11NO	2	Pyridines and derivatives	Organoheterocyclic compounds	6-Acetyl-1,2,3,4-tetrahydropyridine	https://hmdb.ca/metabolites/HMDB0030345	Exogenous,Endogenous
Hydroxycotinine	m581	HMDB0001390			rppos	C10H12N2O2	2	Pyridines and derivatives	Organoheterocyclic compounds	Hydroxycotinine	https://hmdb.ca/metabolites/HMDB0001390	Exogenous,Endogenous
5'-Hydroxycotinine	m582	HMDB0001427			rppos	C10H12N2O2	2	Pyridines and derivatives	Organoheterocyclic compounds	5'-Hydroxycotinine	https://hmdb.ca/metabolites/HMDB0001427	Exogenous,Endogenous
Cytidine	m583	HMDB0000089	C00475		rppos	C9H13N3O5	1	Pyrimidine nucleosides	Nucleosides	Cytidine	https://hmdb.ca/metabolites/HMDB0000089	Exogenous
Cytosine	m584	HMDB0000630	C00380		rppos	C4H5N3O	2	Diazines	Organoheterocyclic compounds	Cytosine	https://hmdb.ca/metabolites/HMDB0000630	Exogenous,Endogenous
1-(2-Furfuryl)-pyrrole	m585	HMDB0030204			rppos	C9H9NO	2	Pyrroles	Organoheterocyclic compounds	1-(2-Furanylmethyl)-1H-pyrrole	https://hmdb.ca/metabolites/HMDB0030204	Exogenous,Endogenous
n-alkylpyrrolidines	m586	HMDB0039834			rppos	C9H17NO	2	Pyrrolidines	Organoheterocyclic compounds	2-(1-Pyrrolidinyl)-3-pentanone	https://hmdb.ca/metabolites/HMDB0039834	Exogenous
Phosphorylcholine	m587	HMDB0001565	C00588		rppos	C5H14NO4P	2	Organonitrogen compounds	Organic nitrogen compounds	Phosphorylcholine	https://hmdb.ca/metabolites/HMDB0001565	Exogenous,Endogenous
16-Ketoestradiol	m588	HMDB0000406	C14383		rppos	C18H22O3	2	Steroids and steroid derivatives	Lipids and lipid-like molecules	16-Ketoestradiol	https://hmdb.ca/metabolites/HMDB0000406	Exogenous,Endogenous
2-Methoxyestradiol	m589	HMDB0000405	C05302		rppos	C19H26O3	2	Steroids and steroid derivatives	Lipids and lipid-like molecules	2-Methoxyestradiol	https://hmdb.ca/metabolites/HMDB0000405
Betamethasone 17 Valerate	m590			PubChem 578771	rppos	C27H37FO6	2	Steroids and steroid derivatives	Lipids and lipid-like molecules	Betamethasone 17 Valerate
14alpha-Hydroxyixocarpanolide	m591	HMDB0034334			rppos	C28H40O7	2	Steroids and steroid derivatives	Lipids and lipid-like molecules	14alpha-Hydroxyixocarpanolide	https://hmdb.ca/metabolites/HMDB0034334	Exogenous,Endogenous
O-Methylcorypalline	m592	HMDB0029370			rppos	C12H17NO2	2	Tetrahydroisoquinolines	Organoheterocyclic compounds	O-Methylcorypalline	https://hmdb.ca/metabolites/HMDB0029370	Exogenous,Endogenous
Protocatechuic acid	m593	HMDB0001856	C00230		rppos	C7H6O4	1	Benzene and substituted derivatives	Benzenoids	Protocatechuic acid	https://hmdb.ca/metabolites/HMDB0001856	Exogenous
Syringaldehyde	m594	HMDB0258653			rppos	C9H10O4	1	Phenols	Benzenoids	Syringaldehyde	https://hmdb.ca/metabolites/HMDB0258653
4-Hydroxycinnamic acid	m595	HMDB0002035	C00811		rppos	C9H8O3	1	Cinnamic acids and derivatives	Phenylpropanoids and polyketides	trans-4-Hydroxycinnamic acid	https://hmdb.ca/metabolites/HMDB0002035	Exogenous,Endogenous
Naringenin	m596	HMDB0002670	C00509		rppos	C15H12O5	1	Flavonoids	Phenylpropanoids and polyketides	(<b1>)-Naringenin	https://hmdb.ca/metabolites/HMDB0002670	Exogenous,Endogenous
Eriodictyol	m597	HMDB0005810	C05631		rppos	C15H12O6	1	Flavonoids	Phenylpropanoids and polyketides	Eriodictyol	https://hmdb.ca/metabolites/HMDB0005810
Epicatechin	m598	HMDB0001871	C09727		rppos	C15H14O6	1	Flavonoids	Phenylpropanoids and polyketides	(-)-Epicatechin	https://hmdb.ca/metabolites/HMDB0001871	Exogenous,Endogenous
Formononetin	m599	HMDB0005808	C00858		rppos	C16H12O4	1	Isoflavonoids	Phenylpropanoids and polyketides	Formononetin	https://hmdb.ca/metabolites/HMDB0005808	Exogenous,Endogenous
Chrysoeriol	m600	HMDB0030667	C04293		rppos	C16H12O6	1	Flavonoids	Phenylpropanoids and polyketides	Chrysoeriol	https://hmdb.ca/metabolites/HMDB0030667	Exogenous
Tangeritin	m601	HMDB0030539	C10190		rppos	C20H20O7	1	Flavonoids	Phenylpropanoids and polyketides	Tangeretin	https://hmdb.ca/metabolites/HMDB0030539	Exogenous,Endogenous
Baicalin	m602	HMDB0041832	C10025		rppos	C21H18O11	1	Flavonoids	Phenylpropanoids and polyketides	Baicalin	https://hmdb.ca/metabolites/HMDB0041832
Orientin	m603	HMDB0030614	C10114		rppos	C21H20O11	1	Flavonoids	Phenylpropanoids and polyketides	Orientin	https://hmdb.ca/metabolites/HMDB0030614
Nobiletin	m604	HMDB0029540	C10112		rppos	C21H22O8	1	Flavonoids	Phenylpropanoids and polyketides	Nobiletin	https://hmdb.ca/metabolites/HMDB0029540	Exogenous,Endogenous
Spermidine	m605	HMDB0001257	C00315		rppos	C7H19N3	1	Organonitrogen compounds	Organic nitrogen compounds	Spermidine	https://hmdb.ca/metabolites/HMDB0001257	Exogenous
Phenylethylamine	m606	HMDB0012275	C05332		rppos	C8H11N	1	Benzene and substituted derivatives	Benzenoids	Phenylethylamine	https://hmdb.ca/metabolites/HMDB0012275	Exogenous,Endogenous
Gluconate 6-phosphate	m607	HMDB0001316	C00345		rppos	C6H13O10P	1	Organooxygen compounds	Organic oxygen compounds	6-Phosphogluconic acid	https://hmdb.ca/metabolites/HMDB0001316	Exogenous
G6P/G1P/M6P/F6P	m608	HMDB0001401	C00092		rppos	C6H13O9P	1	Organooxygen compounds	Organic oxygen compounds	Glucose 6-phosphate	https://hmdb.ca/metabolites/HMDB0001401	Exogenous
Testosterone	m609	HMDB0000234	C00535		rppos	C19H28O2	1	Steroids and steroid derivatives	Lipids and lipid-like molecules	Testosterone	https://hmdb.ca/metabolites/HMDB0000234	Exogenous
Androstenedione	m610	HMDB0000053	C00280		rppos	C19H26O2	1	Steroids and steroid derivatives	Lipids and lipid-like molecules	Androstenedione	https://hmdb.ca/metabolites/HMDB0000053	Exogenous
Dihydrotestosterone	m611	HMDB0002961	C03917		rppos	C19H30O2	1	Steroids and steroid derivatives	Lipids and lipid-like molecules	Dihydrotestosterone	https://hmdb.ca/metabolites/HMDB0002961	Exogenous,Endogenous
Progesterone	m612	HMDB0001830	C00410		rppos	C21H30O2	1	Steroids and steroid derivatives	Lipids and lipid-like molecules	Progesterone	https://hmdb.ca/metabolites/HMDB0001830	Exogenous,Endogenous
17-Hydroxyprogesterone	m613	HMDB0000374	C01176		rppos	C21H30O3	1	Steroids and steroid derivatives	Lipids and lipid-like molecules	17-Hydroxyprogesterone	https://hmdb.ca/metabolites/HMDB0000374
Testosterone sulfate	m614	HMDB0002833			rppos	C19H28O5S	1	Steroids and steroid derivatives	Lipids and lipid-like molecules	Testosterone sulfate	https://hmdb.ca/metabolites/HMDB0002833	Exogenous,Endogenous
C17 Sphingosine-1-phosphate	m615			LMSP01050007	rppos	C17H36NO5P	1	Sphingolipids	Lipids and lipid-like molecules	C17 Sphingosine-1-phosphate	https://www.lipidmaps.org/databases/lmsd/LMSP01050007
N-Acetylserine	m616	HMDB0002931			rpneg	C5H9NO4	1	Carboxylic acids and derivatives	Organic acids and derivatives	N-acetyl-L-serine	https://hmdb.ca/metabolites/HMDB0002931
N-Acetylthreonine	m617	HMDB0062557			rpneg	C6H11NO4	1	Carboxylic acids and derivatives	Organic acids and derivatives	N-acetyl-L-threonine	https://hmdb.ca/metabolites/HMDB0062557
N-acetyltryptophan	m618	HMDB0013713			rpneg	C13H14N2O3	1	Carboxylic acids and derivatives	Organic acids and derivatives	N-Acetyltryptophan	https://hmdb.ca/metabolites/HMDB0013713
Phenylacetyl-L-glutamine	m619	HMDB0006344	C04148		rpneg	C13H16N2O4	1	Carboxylic acids and derivatives	Organic acids and derivatives	Phenylacetylglutamine	https://hmdb.ca/metabolites/HMDB0006344	Exogenous,Endogenous
4-Hydroxyphenylglycolic acid	m620	HMDB0000822	C11527		rpneg	C8H8O4	1	Phenols	Benzenoids	p-Hydroxymandelic acid	https://hmdb.ca/metabolites/HMDB0000822	Exogenous,Endogenous
4-Hydroxyhippic acid	m621	HMDB0013678			rpneg	C9H9NO4	1	Benzene and substituted derivatives	Benzenoids	p-Hydroxyhippuric acid	https://hmdb.ca/metabolites/HMDB0013678	Exogenous,Endogenous
Salicyluric acid	m622	HMDB0000840	C07588		rpneg	C9H9NO4	1	Benzene and substituted derivatives	Benzenoids	N-Salicyloylglycine	https://hmdb.ca/metabolites/HMDB0000840	Exogenous,Endogenous
Isodeoxycholic acid	m623	HMDB0000438			rpneg	C24H40O4	1	Steroids and steroid derivatives	Lipids and lipid-like molecules	3b,12a-Dihydroxy-5b-cholanoic acid	https://hmdb.ca/metabolites/HMDB0000438	Exogenous,Endogenous
Taurohyocholic acid	m624	HMDB0011637	C15516		rpneg	C26H45NO7S	1	Steroids and steroid derivatives	Lipids and lipid-like molecules	Taurohyocholate	https://hmdb.ca/metabolites/HMDB0011637	Exogenous,Endogenous
Homovanillic acid	m625	HMDB0000118	C05582		rpneg	C9H10O4	1	Phenols	Benzenoids	3-Methoxy-4-hydroxyphenylacetate	https://hmdb.ca/metabolites/HMDB0000118	Exogenous,Endogenous
2-Hydroxy-3-methylbutyric acid	m626	HMDB0000407			rpneg	C5H10O3	1	Fatty Acyls	Lipids and lipid-like molecules	2-Hydroxyisopentanoic acid	https://hmdb.ca/metabolites/HMDB0000407	Exogenous,Endogenous
2-Hydroxycaproic acid	m627	HMDB0001624			rpneg	C6H12O3	1	Fatty Acyls	Lipids and lipid-like molecules	2-Hydroxycaproate	https://hmdb.ca/metabolites/HMDB0001624	Exogenous,Endogenous
Pimelic acid	m628	HMDB0000857	C02656		rpneg	C7H12O4	1	Fatty Acyls	Lipids and lipid-like molecules	1,5-Pentanedicarboxylic acid	https://hmdb.ca/metabolites/HMDB0000857	Exogenous,Endogenous
alpha-Hydroxyisobutyric acid	m629	HMDB0000729			rpneg	C4H8O3	1	Hydroxy acids and derivatives	Organic acids and derivatives	Acetonic acid	https://hmdb.ca/metabolites/HMDB0000729	Exogenous
2-Hydroxydecanoate	m630	HMDB0094656			rpneg	C10H20O3	3	Fatty Acyls	Lipids and lipid-like molecules	2-Hydroxydecanoate	https://hmdb.ca/metabolites/HMDB0094656
5-Hydroxyindoleacetic acid	m631	HMDB0000763	C05635		rpneg	C10H9NO3	1	Indoles and derivatives	Organoheterocyclic compounds	5-Hydroxyindoleacetic acid	https://hmdb.ca/metabolites/HMDB0000763	Exogenous,Endogenous
LysoPC(P-18:1(9Z)/0:0)	m632	HMDB0010408			rpneg	C26H52NO6P	3	Glycerophospholipids	Lipids and lipid-like molecules	LysoPC(P-18:1(9Z)/0:0)	https://hmdb.ca/metabolites/HMDB0010408	Exogenous
LysoPC(P-18:0/0:0)	m633	HMDB0013122			rpneg	C26H54NO6P	3	Glycerophospholipids	Lipids and lipid-like molecules	LysoPC(P-18:0/0:0)	https://hmdb.ca/metabolites/HMDB0013122	Exogenous
sn1 LysoPC(20:2)	m634	HMDB0010392			rpneg	C28H54NO7P	3	Glycerophospholipids	Lipids and lipid-like molecules	LysoPC(20:2(11Z,14Z)/0:0)	https://hmdb.ca/metabolites/HMDB0010392	Exogenous
sn2 LysoPC(20:2)	m635				rpneg	C28H54NO7P	3	Glycerophospholipids	Lipids and lipid-like molecules	sn2 LysoPC(20:2)
sn1 LysoPE(18:3)	m636	HMDB0011508			rpneg	C23H42NO7P	3	Glycerophospholipids	Lipids and lipid-like molecules	LysoPE(18:3(6Z,9Z,12Z)/0:0)	https://hmdb.ca/metabolites/HMDB0011508	Exogenous
sn2 LysoPE(18:3)	m637	HMDB0011478			rpneg	C23H42NO7P	3	Glycerophospholipids	Lipids and lipid-like molecules	LysoPE(0:0/18:3(6Z,9Z,12Z))	https://hmdb.ca/metabolites/HMDB0011478	Exogenous
sn1 LysoPE(20:5)	m638	HMDB0011519			rpneg	C25H42NO7P	2	Glycerophospholipids	Lipids and lipid-like molecules	LysoPE(20:5(5Z,8Z,11Z,14Z,17Z)/0:0)	https://hmdb.ca/metabolites/HMDB0011519	Exogenous
sn2 LysoPE(20:5)	m639	HMDB0011489			rpneg	C25H42NO7P	2	Glycerophospholipids	Lipids and lipid-like molecules	LysoPE(0:0/20:5(5Z,8Z,11Z,14Z,17Z))	https://hmdb.ca/metabolites/HMDB0011489	Exogenous
sn1 LysoPE(22:4)	m640	HMDB0011523			rpneg	C27H48NO7P	2	Glycerophospholipids	Lipids and lipid-like molecules	LysoPE(22:4(7Z,10Z,13Z,16Z)/0:0)	https://hmdb.ca/metabolites/HMDB0011523	Exogenous
sn1 LysoPE(22:5)	m641	HMDB0011525			rpneg	C27H46NO7P	3	Glycerophospholipids	Lipids and lipid-like molecules	LysoPE(22:5(7Z,10Z,13Z,16Z,19Z)/0:0)	https://hmdb.ca/metabolites/HMDB0011525	Exogenous
sn2 LysoPE(22:5)	m642	HMDB0011494			rpneg	C27H46NO7P	3	Glycerophospholipids	Lipids and lipid-like molecules	LysoPE(0:0/22:5(4Z,7Z,10Z,13Z,16Z))	https://hmdb.ca/metabolites/HMDB0011494	Exogenous
LysoPE(P-16:0/0:0)	m643	HMDB0011152			rpneg	C21H44NO6P	3	Glycerophospholipids	Lipids and lipid-like molecules	LysoPE(P-16:0/0:0)	https://hmdb.ca/metabolites/HMDB0011152	Exogenous
2-Hydroxybenzeneacetic acid	m644	HMDB0000669	C05852		rpneg	C8H8O3	1	Benzene and substituted derivatives	Benzenoids	ortho-Hydroxyphenylacetic acid	https://hmdb.ca/metabolites/HMDB0000669	Exogenous,Endogenous
p-Hydroxyphenylacetic acid	m645	HMDB0000020	C00642		rpneg	C8H8O3	1	Phenols	Benzenoids	p-Hydroxyphenylacetic acid	https://hmdb.ca/metabolites/HMDB0000020	Exogenous,Endogenous
N-Acetylasparagine	m646	HMDB0006028			rpneg	C6H10N2O4	1	Carboxylic acids and derivatives	Organic acids and derivatives	N-acetyl-L-asparagine	https://hmdb.ca/metabolites/HMDB0006028	Exogenous,Endogenous
Formylisoglutamine	m647		C16674		rpneg	C6H10N2O4	3	Carboxylic acids and derivatives	Organic acids and derivatives	Formylisoglutamine	https://www.kegg.jp/entry/C16674
Picolinic acid	m648	HMDB0002243	C10164		rpneg	C6H5NO2	3	Pyridines and derivatives	Organoheterocyclic compounds	Picolinic acid	https://hmdb.ca/metabolites/HMDB0002243	Exogenous,Endogenous
Imidazol-5-yl-pyruvate	m649		C03277		rpneg	C6H6N2O3	3	Azoles	Organoheterocyclic compounds	Imidazol-5-yl-pyruvate	https://www.genome.jp/dbget-bin/www_bget?C03277
Vinylacetylglycine	m650	HMDB0000894			rpneg	C6H9NO3	3	Carboxylic acids and derivatives	Organic acids and derivatives	Vinylacetylglycine	https://hmdb.ca/metabolites/HMDB0000894	Exogenous,Endogenous
(1S,4S)-4-Hydroxy-3-oxocyclohexane-1-carboxylate	m651		C04670		rpneg	C7H10O4	3		Unknown	(1S,4S)-4-Hydroxy-3-oxocyclohexane-1-carboxylate	https://www.kegg.jp/entry/C04670
N-Acetyl-L-glutamate 5-semialdehyde	m652	HMDB0006488	C01250		rpneg	C7H11NO4	3	Carboxylic acids and derivatives	Organic acids and derivatives	N-Acetyl-L-glutamate 5-semialdehyde	https://hmdb.ca/metabolites/HMDB0006488	Exogenous,Endogenous
N-Acetyl-L-glutamic acid	m653	HMDB0001138	C00624		rpneg	C7H11NO5	1	Carboxylic acids and derivatives	Organic acids and derivatives	N-acetyl-L-glutamic acid	https://hmdb.ca/metabolites/HMDB0001138	Exogenous,Endogenous
Quinic acid	m654	HMDB0003072	C00296		rpneg	C7H12O6	1	Organooxygen compounds	Organic oxygen compounds	Chinic acid	https://hmdb.ca/metabolites/HMDB0003072
N-Acetyl-L-methionine	m655	HMDB0011745	C02712		rpneg	C7H13NO3S	1	Carboxylic acids and derivatives	Organic acids and derivatives	N-acetyl-L-methionine	https://hmdb.ca/metabolites/HMDB0011745	Exogenous,Endogenous
7,9-Dimethyluric acid	m656	HMDB0004308			rpneg	C7H8N4O3	3	Imidazopyrimidines	Organoheterocyclic compounds	7,9-Dimethyluric acid	https://hmdb.ca/metabolites/HMDB0004308	Exogenous,Endogenous
1,3,7-Trimethyluric acid	m657	HMDB0002123	C16361		rpneg	C8H10N4O3	3	Imidazopyrimidines	Organoheterocyclic compounds	1,3,7-Trimethyluric acid	https://hmdb.ca/metabolites/HMDB0002123	Exogenous
Suberic acid	m658	HMDB0000893	C08278		rpneg	C8H14O4	1	Fatty Acyls	Lipids and lipid-like molecules	1,6-Dicarboxyhexane	https://hmdb.ca/metabolites/HMDB0000893	Exogenous,Endogenous
6-Acetyl-D-glucose	m659		C02655		rpneg	C8H14O7	3	Organooxygen compounds	Organic oxygen compounds	6-Acetyl-D-glucose	https://www.genome.jp/dbget-bin/www_bget?cpd:C02655
Isovalerylalanine	m660	HMDB0000747			rpneg	C8H15NO3	3	Carboxylic acids and derivatives	Organic acids and derivatives	Isovalerylalanine	https://hmdb.ca/metabolites/HMDB0000747	Exogenous,Endogenous
N-acetyl-L-leucine	m661	HMDB0011756	C02710		rpneg	C8H15NO3	1	Carboxylic acids and derivatives	Organic acids and derivatives	N-Acetyl-Leu	https://hmdb.ca/metabolites/HMDB0011756	Exogenous,Endogenous
N-Acetylisoleucine	m662	HMDB0061684			rpneg	C8H15NO3	3	Carboxylic acids and derivatives	Organic acids and derivatives	N-Acetylisoleucine	https://hmdb.ca/metabolites/HMDB0061684	Exogenous
N-Acetyl-DL-leucine	m663	HMDB0341345			rpneg	C8H15NO3	3	Carboxylic acids and derivatives	Organic acids and derivatives	N-Acetyl-DL-leucine	https://hmdb.ca/metabolites/HMDB0341345
Hydroxypyruvic acid*	m664	HMDB0001352	C00168		rpneg	C3H4O4	3	Hydroxy acids and derivatives	Organic acids and derivatives	Hydroxypyruvic acid	https://hmdb.ca/metabolites/HMDB0001352	Exogenous
Genipic acid	m665	HMDB0036072			rpneg	C9H12O4	3	Dihydrofurans	Organoheterocyclic compounds	Genipic acid	https://hmdb.ca/metabolites/HMDB0036072	Exogenous,Endogenous
Azelaic acid	m666	HMDB0000784	C08261		rpneg	C9H16O4	1	Fatty Acyls	Lipids and lipid-like molecules	1,7-Dicarboxyheptane	https://hmdb.ca/metabolites/HMDB0000784	Exogenous,Endogenous
Indole-3-carboxylic acid	m667	HMDB0003320	C19837		rpneg	C9H7NO2	1	Indoles and derivatives	Organoheterocyclic compounds	indole-3-carboxylic acid	https://hmdb.ca/metabolites/HMDB0003320	Exogenous,Endogenous
5-Hydroxyindole-2-carboxylic acid	m668			OSI01174	rpneg	C9H7NO3	3		Unknown	5-Hydroxyindole-2-carboxylic acid
3-(3,4-Dihydroxyphenyl)pyruvate*	m669	HMDB0304103			rpneg	C9H8O5	3	Benzene and substituted derivatives	Benzenoids	3,4-dihydroxyphenylpyruvate	https://hmdb.ca/metabolites/HMDB0304103	Exogenous
Tryptophanol	m670	HMDB0003447	C00955		rpneg	C10H11NO	3	Indoles and derivatives	Organoheterocyclic compounds	Tryptophol	https://hmdb.ca/metabolites/HMDB0003447	Exogenous,Endogenous
p-Hydroxyphenylacetylglycine	m671	HMDB0000735	C05596		rpneg	C10H11NO4	3	Carboxylic acids and derivatives	Organic acids and derivatives	Hydroxyphenylacetylglycine	https://hmdb.ca/metabolites/HMDB0000735	Exogenous,Endogenous
Vanillactic acid	m672	HMDB0000913			rpneg	C10H12O5	3	Phenylpropanoic acids	Phenylpropanoids and polyketides	Vanillactic acid	https://hmdb.ca/metabolites/HMDB0000913	Exogenous,Endogenous
(2E,6E,8E)-deca-2,6,8-trienoic acid	m673	HMDB0340573			rpneg	C10H14O2	3	Fatty Acyls	Lipids and lipid-like molecules	(2E,6E,8E)-deca-2,6,8-trienoic acid	https://hmdb.ca/metabolites/HMDB0340573
(5Z,7E)-3-hydroxydeca-5,7-dienoic acid	m674	HMDB0340561			rpneg	C10H16O3	3	Fatty Acyls	Lipids and lipid-like molecules	(5Z,7E)-3-hydroxydeca-5,7-dienoic acid	https://hmdb.ca/metabolites/HMDB0340561
Sebacic acid	m675	HMDB0000792	C08277		rpneg	C10H18O4	1	Fatty Acyls	Lipids and lipid-like molecules	1,10-Decanedioic acid	https://hmdb.ca/metabolites/HMDB0000792	Exogenous,Endogenous
Xanthurenic acid	m676	HMDB0000881	C02470		rpneg	C10H7NO4	1	Quinolines and derivatives	Organoheterocyclic compounds	xanthurenic acid	https://hmdb.ca/metabolites/HMDB0000881	Exogenous,Endogenous
5H6MI2c	m677	HMDB0246803			rpneg	C10H9NO4	3	Indoles and derivatives	Organoheterocyclic compounds	5-Hydroxy-6-methoxy-1h-indole-2-carboxylic acid	https://hmdb.ca/metabolites/HMDB0246803
N-Acetyl-L-tyrosine	m678	HMDB0000866	C01657		rpneg	C11H13NO4	1	Carboxylic acids and derivatives	Organic acids and derivatives	N-acetyl-L-tyrosine	https://hmdb.ca/metabolites/HMDB0000866	Exogenous,Endogenous
3-(4-Hydroxy-3-methoxyphenyl)-2-methylpropionic acid	m679	HMDB0060737			rpneg	C11H14O4	3	Phenylpropanoic acids	Phenylpropanoids and polyketides	3-(4-Hydroxy-3-methoxyphenyl)-2-methylpropionic acid	https://hmdb.ca/metabolites/HMDB0060737
3,4,5-Trimethoxyphenyl acetate	m680	HMDB0031722			rpneg	C11H14O5	3	Phenol esters	Benzenoids	3,4,5-Trimethoxyphenyl acetate	https://hmdb.ca/metabolites/HMDB0031722	Exogenous,Endogenous
Histidylproline	m681	HMDB0028893			rpneg	C11H16N4O3	3	Carboxylic acids and derivatives	Organic acids and derivatives	Histidylproline	https://hmdb.ca/metabolites/HMDB0028893	Exogenous
Indolepyruvate*	m682	HMDB0060484	C00331		rpneg	C11H9NO3	1	Indoles and derivatives	Organoheterocyclic compounds	Indole-3-pyruvic acid	https://hmdb.ca/metabolites/HMDB0060484	Exogenous,Endogenous
Phenobarbital	m683	HMDB0015305	C07434		rpneg	C12H12N2O3	3	Diazines	Organoheterocyclic compounds	Phenobarbital	https://hmdb.ca/metabolites/HMDB0015305
N-Feruloylglycine	m684	HMDB0059747	C02564		rpneg	C12H13NO5	3	Carboxylic acids and derivatives	Organic acids and derivatives	4-Hydroxy-3-methoxy-cinnamoylglycine	https://hmdb.ca/metabolites/HMDB0059747
Traumatic acid	m685	HMDB0000933	C16308		rpneg	C12H20O4	3	Fatty Acyls	Lipids and lipid-like molecules	Traumatic acid	https://hmdb.ca/metabolites/HMDB0000933	Exogenous,Endogenous
dodec-6-enedioic acid	m686	HMDB0340666			rpneg	C12H20O4	3	Hydroxy acids and derivatives	Organic acids and derivatives	dodec-6-enedioic acid	https://hmdb.ca/metabolites/HMDB0340666
Glutarylcarnitine	m687	HMDB0013130			rpneg	C12H21NO6	1	Fatty Acyls	Lipids and lipid-like molecules	Glutaroyl carnitine	https://hmdb.ca/metabolites/HMDB0013130	Exogenous,Endogenous
5Z-Dodecenoic acid	m688	HMDB0000529			rpneg	C12H22O2	1	Fatty Acyls	Lipids and lipid-like molecules	cis-5-Dodecanoic acid	https://hmdb.ca/metabolites/HMDB0000529	Exogenous
dodec-3-enoic acid	m689	HMDB0340654			rpneg	C12H22O2	3	Fatty Acyls	Lipids and lipid-like molecules	dodec-3-enoic acid	https://hmdb.ca/metabolites/HMDB0340654
dodec-6-enoic acid	m690	HMDB0340655			rpneg	C12H22O2	3	Fatty Acyls	Lipids and lipid-like molecules	dodec-6-enoic acid	https://hmdb.ca/metabolites/HMDB0340655
Dibutyl malate	m691	HMDB0031696			rpneg	C12H22O5	3	Hydroxy acids and derivatives	Organic acids and derivatives	Dibutyl malate	https://hmdb.ca/metabolites/HMDB0031696	Exogenous,Endogenous
4-Nitrophenyl-3-ketovalidamine	m692		C03995		rpneg	C13H16N2O6	3		Unknown	4-Nitrophenyl-3-ketovalidamine	https://www.genome.jp/dbget-bin/www_bget?cpd:C03995
2,2,4,4,-Tetramethyl-6-(1-oxopropyl)-1,3,5-cyclohexanetrione	m693	HMDB0033191			rpneg	C13H18O4	3	Prenol lipids	Lipids and lipid-like molecules	2,2,4,4,-Tetramethyl-6-(1-oxopropyl)-1,3,5-cyclohexanetrione	https://hmdb.ca/metabolites/HMDB0033191	Exogenous,Endogenous
(S,E)-Lyratol propanoate	m694	HMDB0031869			rpneg	C13H20O2	3	Carboxylic acids and derivatives	Organic acids and derivatives	(S,E)-Lyratol propanoate	https://hmdb.ca/metabolites/HMDB0031869	Exogenous,Endogenous
(3S,5R,6R,7E)-3,5,6-Trihydroxy-7-megastigmen-9-one	m695	HMDB0038736			rpneg	C13H22O4	3	Prenol lipids	Lipids and lipid-like molecules	(3S,5R,6R,7E)-3,5,6-Trihydroxy-7-megastigmen-9-one	https://hmdb.ca/metabolites/HMDB0038736	Exogenous,Endogenous
2-Phenylethanol glucuronide	m696	HMDB0010350			rpneg	C14H18O7	3	Organooxygen compounds	Organic oxygen compounds	2-Phenylethanol glucuronide	https://hmdb.ca/metabolites/HMDB0010350	Exogenous,Endogenous
S-(5-Adenosy)-L-homocysteine	m697	HMDB0000939	C00021		rpneg	C14H20N6O5S	3	Lactones	Organoheterocyclic compounds	S-Adenosylhomocysteine	https://hmdb.ca/metabolites/HMDB0000939
2,2,4,4-Tetramethyl-6-(1-oxobutyl)-1,3,5-cyclohexanetrione	m698	HMDB0033197			rpneg	C14H20O4	3	Prenol lipids	Lipids and lipid-like molecules	2,2,4,4-Tetramethyl-6-(1-oxobutyl)-1,3,5-cyclohexanetrione	https://hmdb.ca/metabolites/HMDB0033197	Exogenous,Endogenous
Geranyl acetoacetate	m699	HMDB0038256			rpneg	C14H22O3	3	Fatty Acyls	Lipids and lipid-like molecules	Geranyl acetoacetate	https://hmdb.ca/metabolites/HMDB0038256	Exogenous,Endogenous
L-Menthyl acetoacetate	m700	HMDB0032369			rpneg	C14H24O3	3	Prenol lipids	Lipids and lipid-like molecules	L-Menthyl acetoacetate	https://hmdb.ca/metabolites/HMDB0032369
Monomenthyl succinate	m701	HMDB0036143			rpneg	C14H24O4	3	Prenol lipids	Lipids and lipid-like molecules	Monomenthyl succinate	https://hmdb.ca/metabolites/HMDB0036143	Exogenous,Endogenous
Phenylbutyrylglutamine	m702	HMDB0011687			rpneg	C15H20N2O4	3	Carboxylic acids and derivatives	Organic acids and derivatives	Phenylbutyrylglutamine	https://hmdb.ca/metabolites/HMDB0011687	Exogenous,Endogenous
Deoxydihydro-artemisinin	m703	HMDB0060570			rpneg	C15H24O4	3	Dioxolopyrans	Organoheterocyclic compounds	Deoxydihydro-artemisinin	https://hmdb.ca/metabolites/HMDB0060570
Mono-ethylhexylphthalate	m704	HMDB0013248	C03343		rpneg	C16H22O4	3	Benzene and substituted derivatives	Benzenoids	Monoethylhexyl phthalic acid	https://hmdb.ca/metabolites/HMDB0013248	Exogenous,Endogenous
3,8-Dihydroxy-6-methoxy-7(11)-eremophilen-12,8-olide	m705	HMDB0041551			rpneg	C16H24O5	3	Prenol lipids	Lipids and lipid-like molecules	3,8-Dihydroxy-6-methoxy-7(11)-eremophilen-12,8-olide	https://hmdb.ca/metabolites/HMDB0041551	Exogenous,Endogenous
3-Methyl-alpha-ionyl acetate	m706	HMDB0037631			rpneg	C16H26O2	3	Prenol lipids	Lipids and lipid-like molecules	3-Methyl-alpha-ionyl acetate	https://hmdb.ca/metabolites/HMDB0037631	Exogenous,Endogenous
(4S,6R)-p-Mentha-1,8-diene-6,7-diol 7-glucoside	m707	HMDB0039056			rpneg	C16H26O7	3	Prenol lipids	Lipids and lipid-like molecules	(4S,6R)-p-Mentha-1,8-diene-6,7-diol 7-glucoside	https://hmdb.ca/metabolites/HMDB0039056	Exogenous,Endogenous
Myristoylglycine	m708	HMDB0013250			rpneg	C16H31NO3	3	Carboxylic acids and derivatives	Organic acids and derivatives	Myristoylglycine	https://hmdb.ca/metabolites/HMDB0013250
16-Hydroxypalmitate	m709	HMDB0006294	C18218		rpneg	C16H32O3	3	Fatty Acyls	Lipids and lipid-like molecules	16-Hydroxyhexadecanoic acid	https://hmdb.ca/metabolites/HMDB0006294
5'-Carboxy-gamma-chromanol	m710	HMDB0012799			rpneg	C18H26O4	3	Benzopyrans	Organoheterocyclic compounds	5'-Carboxy-gamma-chromanol	https://hmdb.ca/metabolites/HMDB0012799
Stearidonic acid	m711	HMDB0006547	C16300		rpneg	C18H28O2	3	Fatty Acyls	Lipids and lipid-like molecules	Stearidonic acid	https://hmdb.ca/metabolites/HMDB0006547
Ricinoleic acid	m712	HMDB0034297	C08365		rpneg	C18H34O3	1	Fatty Acyls	Lipids and lipid-like molecules	12-Hydroxyoleic acid	https://hmdb.ca/metabolites/HMDB0034297	Exogenous,Endogenous
18-Hydroxyoleate	m713	HMDB0304033			rpneg	C18H34O3	3	Fatty Acyls	Lipids and lipid-like molecules	18-hydroxyoleate	https://hmdb.ca/metabolites/HMDB0304033	Exogenous
12-Hydroxystearic acid	m714	HMDB0061706			rpneg	C18H36O3	1	Fatty Acyls	Lipids and lipid-like molecules	12-Hydroxy-octadecanoic acid	https://hmdb.ca/metabolites/HMDB0061706
(9S,10S)-9,10-Dihydroxyoctadecanoate	m715	HMDB0059633	C15988		rpneg	C18H36O4	3	Fatty Acyls	Lipids and lipid-like molecules	(9S,10S)-9,10-dihydroxyoctadecanoate	https://hmdb.ca/metabolites/HMDB0059633
Millefin	m716	HMDB0036689			rpneg	C19H26O6	3	Prenol lipids	Lipids and lipid-like molecules	Millefin	https://hmdb.ca/metabolites/HMDB0036689	Exogenous,Endogenous
Yucalexin P15	m717	HMDB0036753			rpneg	C20H26O4	3	Prenol lipids	Lipids and lipid-like molecules	Yucalexin P15	https://hmdb.ca/metabolites/HMDB0036753	Exogenous,Endogenous
Gibberellin A44	m718	HMDB0036901	C12308		rpneg	C20H26O5	3	Prenol lipids	Lipids and lipid-like molecules	Gibberellin A44	https://hmdb.ca/metabolites/HMDB0036901	Exogenous
7'-Carboxy-gamma-chromanol	m719	HMDB0012850			rpneg	C20H30O4	3	Benzopyrans	Organoheterocyclic compounds	7'-Carboxy-gamma-chromanol	https://hmdb.ca/metabolites/HMDB0012850
Ethyl 7-epi-12-hydroxyjasmonate glucoside	m720	HMDB0036340			rpneg	C20H32O9	3	Fatty Acyls	Lipids and lipid-like molecules	Ethyl 7-epi-12-hydroxyjasmonate glucoside	https://hmdb.ca/metabolites/HMDB0036340
Equol 4'-O-glucuronide	m721	HMDB0041731			rpneg	C21H22O9	3	Flavonoids	Phenylpropanoids and polyketides	Equol 4'-O-glucuronide	https://hmdb.ca/metabolites/HMDB0041731	Exogenous,Endogenous
Pregnanediol	m722	HMDB0004025	C05484		rpneg	C21H36O2	3	Steroids and steroid derivatives	Lipids and lipid-like molecules	Pregnanediol	https://hmdb.ca/metabolites/HMDB0004025	Exogenous,Endogenous
(2S,4S,6S)-2-[2-(4-Hydroxy-3-meyhoxyphenyl)ethyl]tetrahydro-6-(4,5-dihydroxy-3-methoxyphenyl)-2H-pyran-4-yl 4-acetate	m723	HMDB0030503			rpneg	C23H28O8	3	Diarylheptanoids	Phenylpropanoids and polyketides	(2S,4S,6S)-2-[2-(4-Hydroxy-3-meyhoxyphenyl)ethyl]tetrahydro-6-(4,5-dihydroxy-3-methoxyphenyl)-2H-pyran-4-yl 4-acetate	https://hmdb.ca/metabolites/HMDB0030503	Exogenous
Norcholic acid	m724	HMDB0255727			rpneg	C23H38O5	1	Steroids and steroid derivatives	Lipids and lipid-like molecules	Norcholate	https://hmdb.ca/metabolites/HMDB0255727
Varanic acid	m725	HMDB0002195			rpneg	C26H44O5	3	Steroids and steroid derivatives	Lipids and lipid-like molecules	Varanic acid	https://hmdb.ca/metabolites/HMDB0002195	Exogenous,Endogenous
5beta-Cyprinolsulfate	m726	HMDB0006888	C05468		rpneg	C27H48O8S	3	Steroids and steroid derivatives	Lipids and lipid-like molecules	5b-Cyprinol sulfate	https://hmdb.ca/metabolites/HMDB0006888	Exogenous,Endogenous
Cholestane-3,7,12,25-tetrol-3-glucuronide	m727	HMDB0010355			rpneg	C33H56O10	3	Steroids and steroid derivatives	Lipids and lipid-like molecules	Cholestane-3,7,12,25-tetrol-3-glucuronide	https://hmdb.ca/metabolites/HMDB0010355	Exogenous,Endogenous
Caproic acid	m728	HMDB0000535	C01585		rpneg	C6H12O2	3	Fatty Acyls	Lipids and lipid-like molecules	1-Hexanoic acid	https://hmdb.ca/metabolites/HMDB0000535	Endogenous
2-Keto-3-deoxy-D-gluconic acid*	m729	HMDB0001353	C01216		rpneg	C6H10O6	3	Keto acids and derivatives	Organic acids and derivatives	2-Keto-3-deoxy-D-gluconic acid	https://hmdb.ca/metabolites/HMDB0001353	Exogenous,Endogenous
2-Oxoarginine*	m730	HMDB0004225	C03771		rpneg	C6H11N3O3	3	Keto acids and derivatives	Organic acids and derivatives	2-Oxoarginine	https://hmdb.ca/metabolites/HMDB0004225	Exogenous,Endogenous
N-Butyrylglycine	m731	HMDB0000808			rpneg	C6H11NO3	3	Carboxylic acids and derivatives	Organic acids and derivatives	N-Butyrylglycine	https://hmdb.ca/metabolites/HMDB0000808	Exogenous,Endogenous
Isobutyrylglycine	m732	HMDB0000730			rpneg	C6H11NO3	3	Carboxylic acids and derivatives	Organic acids and derivatives	Isobutyrylglycine	https://hmdb.ca/metabolites/HMDB0000730	Exogenous,Endogenous
4-acetamidobutanoate	m733	HMDB0003681	C02946		rpneg	C6H11NO3	3	Carboxylic acids and derivatives	Organic acids and derivatives	4-Acetamidobutanoic acid	https://hmdb.ca/metabolites/HMDB0003681	Exogenous,Endogenous
5-Methylthioribulose 1-phosphate	m734	HMDB0001299	C04582		rpneg	C6H13O7PS	3	Organooxygen compounds	Organic oxygen compounds	5-Methylthioribulose 1-phosphate	https://hmdb.ca/metabolites/HMDB0001299	Exogenous,Endogenous
7-Methylxanthine	m735	HMDB0001991	C16353		rpneg	C6H6N4O2	3	Imidazopyrimidines	Organoheterocyclic compounds	7-Methylxanthine	https://hmdb.ca/metabolites/HMDB0001991	Exogenous,Endogenous
3-Methylxanthine	m736	HMDB0001886	C16357		rpneg	C6H6N4O2	3	Imidazopyrimidines	Organoheterocyclic compounds	3-Methylxanthine	https://hmdb.ca/metabolites/HMDB0001886	Exogenous,Endogenous
Hydantoin-5-propionic acid	m737	HMDB0001212	C05565		rpneg	C6H8N2O4	3	Azolidines	Organoheterocyclic compounds	Hydantoin-5-propionic acid	https://hmdb.ca/metabolites/HMDB0001212	Exogenous,Endogenous
4-Methylcatechol sulfate	m738	HMDB0242166			rpneg	C7H6O6S	3	Organic sulfuric acids and derivatives	Organic acids and derivatives	4-Methylcatechol sulfate	https://hmdb.ca/metabolites/HMDB0242166
2-Furoylglycine	m739	HMDB0000439			rpneg	C7H7NO4	3	Carboxylic acids and derivatives	Organic acids and derivatives	2-Furoylglycine	https://hmdb.ca/metabolites/HMDB0000439	Exogenous,Endogenous
3,4-Dihydroxybenzylamine	m740	HMDB0012153			rpneg	C7H9NO2	3	Phenols	Benzenoids	3,4-Dihydroxybenzylamine	https://hmdb.ca/metabolites/HMDB0012153	Exogenous,Endogenous
O-Succinyl-L-homoserine	m741	HMDB0255868			rpneg	C8H13NO6	3	Carboxylic acids and derivatives	Organic acids and derivatives	O-Succinyl-L-homoserine	https://hmdb.ca/metabolites/HMDB0255868
1-Carboxyethylvaline	m742	HMDB0240627			rpneg	C8H15NO4	3	Carboxylic acids and derivatives	Organic acids and derivatives	1-Carboxyethylvaline	https://hmdb.ca/metabolites/HMDB0240627
4-hydroxyhexanoylglycine	m743	HMDB0094721			rpneg	C8H15NO4	3	Carboxylic acids and derivatives	Organic acids and derivatives	4-hydroxyhexanoylglycine	https://hmdb.ca/metabolites/HMDB0094721
5-hydroxyhexanoylglycine	m744	HMDB0094722			rpneg	C8H15NO4	3	Carboxylic acids and derivatives	Organic acids and derivatives	5-hydroxyhexanoylglycine	https://hmdb.ca/metabolites/HMDB0094722
Phenylglyoxylic acid*	m745	HMDB0001587	C02137		rpneg	C8H6O3	3	Benzene and substituted derivatives	Benzenoids	Phenylglyoxylic acid	https://hmdb.ca/metabolites/HMDB0001587	Exogenous,Endogenous
2-Hydroxyphenylacetic acid sulfate	m746	HMDB0240441			rpneg	C8H8O6S	3	Organic sulfuric acids and derivatives	Organic acids and derivatives	2-Hydroxyphenylacetate sulfate	https://hmdb.ca/metabolites/HMDB0240441	Exogenous
Methyl-4-hydroxybenzoate sulfate	m747	HMDB0168668			rpneg	C8H8O6S	3	Organic sulfuric acids and derivatives	Organic acids and derivatives	Methyl-4-hydroxybenzoate sulphate	https://hmdb.ca/metabolites/HMDB0168668
Dihydroxyphenylacetic acid sulfate	m748	HMDB0304904			rpneg	C8H8O7S	3		Unknown	Dihydroxyphenylacetic acid sulfate	https://hmdb.ca/metabolites/HMDB0304904
Dihydroferulic acid 4-O-sulfate	m749	HMDB0041724			rpneg	C10H12O7S	3	Organic sulfuric acids and derivatives	Organic acids and derivatives	Dihydroferulic acid 4-O-sulfate	https://hmdb.ca/metabolites/HMDB0041724	Exogenous,Endogenous
3-[4-methoxy-3-(sulfooxy)phenyl]propanoic acid	m750	HMDB0131144			rpneg	C10H12O7S	3	Organic sulfuric acids and derivatives	Organic acids and derivatives	3-[4-Methoxy-3-(sulfooxy)phenyl]propanoate	https://hmdb.ca/metabolites/HMDB0131144	Exogenous,Endogenous
N4-Acetylcytidine	m751	HMDB0005923			rpneg	C11H15N3O6	3	Pyrimidine nucleosides	Nucleosides	N4-Acetylcytidine	https://hmdb.ca/metabolites/HMDB0005923	Exogenous,Endogenous
N-lactoyl-Tyrosine	m752	HMDB0062177			rpneg	C12H15NO5	3	Carboxylic acids and derivatives	Organic acids and derivatives	N-lactoyl-Tyrosine	https://hmdb.ca/metabolites/HMDB0062177
N-Phenylacetylglutamic acid	m753	HMDB0059772			rpneg	C13H15NO5	3	Carboxylic acids and derivatives	Organic acids and derivatives	N-Phenylacetylglutamic acid	https://hmdb.ca/metabolites/HMDB0059772
Ibuprofen	m754	HMDB0001925	C01588		rpneg	C13H18O2	3	Phenylpropanoic acids	Phenylpropanoids and polyketides	Ibuprofen	https://hmdb.ca/metabolites/HMDB0001925	Exogenous
1,11-Undecanedicarboxylic acid	m755	HMDB0002327			rpneg	C13H24O4	3	Fatty Acyls	Lipids and lipid-like molecules	1,11-Undecanedicarboxylic acid	https://hmdb.ca/metabolites/HMDB0002327	Exogenous,Endogenous
isomer 1 of 1,11-Undecanedicarboxylic acid	m756				rpneg	C13H24O4	3	Fatty Acyls	Lipids and lipid-like molecules	isomer 1 of 1,11-Undecanedicarboxylic acid
isomer 2 of 1,11-Undecanedicarboxylic acid	m757				rpneg	C13H24O4	3	Fatty Acyls	Lipids and lipid-like molecules	isomer 2 of 1,11-Undecanedicarboxylic acid
Indoxyl glucuronide	m758	HMDB0010319			rpneg	C14H15NO7	3	Organooxygen compounds	Organic oxygen compounds	Indoxyl glucuronide	https://hmdb.ca/metabolites/HMDB0010319
N6-Carbamoyl-L-threonyladenosine	m759	HMDB0041623		PubChem 161466	rpneg	C15H20N6O8	3	Purine nucleosides	Nucleosides	N6-Carbamoyl-L-threonyladenosine	https://pubchem.ncbi.nlm.nih.gov/compound/161466
Gemfibrozil	m760	HMDB0015371	C07020		rpneg	C15H22O3	3	Phenol ethers	Benzenoids	Gemfibrozil	https://hmdb.ca/metabolites/HMDB0015371
Tobramycin	m761	HMDB0014822	C00397		rpneg	C18H37N5O9	3	Organooxygen compounds	Organic oxygen compounds	Tobramycin	https://hmdb.ca/metabolites/HMDB0014822
Eicosanedioic acid	m762	HMDB0242141			rpneg	C20H38O4	3	Fatty Acyls	Lipids and lipid-like molecules	Eicosanedioic acid	https://hmdb.ca/metabolites/HMDB0242141
alpha-CEHC glucuronide	m763	HMDB0062445			rpneg	C22H30O10	3	Organooxygen compounds	Organic oxygen compounds	alpha-CEHC glucuronide	https://hmdb.ca/metabolites/HMDB0062445	Exogenous
Adrenic acid	m764	HMDB0002226	C16527		rpneg	C22H36O2	3	Fatty Acyls	Lipids and lipid-like molecules	(7Z,10Z,13Z,16Z)-Docosa-7,10,13,16-tetraenoic acid	https://hmdb.ca/metabolites/HMDB0002226
Mycophenolic acid glucuronide	m765	HMDB0060634			rpneg	C23H28O12	3	Organooxygen compounds	Organic oxygen compounds	Mycophenolic acid glucuronide	https://hmdb.ca/metabolites/HMDB0060634
11-Oxo-androsterone glucuronide	m766	HMDB0010338			rpneg	C25H36O9	3	Steroids and steroid derivatives	Lipids and lipid-like molecules	11-Oxo-androsterone glucuronide	https://hmdb.ca/metabolites/HMDB0010338	Exogenous,Endogenous
11-ketoetiocholanolone glucuronide	m767	HMDB0341220			rpneg	C25H36O9	3		Unknown	11-ketoetiocholanolone glucuronide	https://hmdb.ca/metabolites/HMDB0341220
11-beta-Hydroxyandrosterone-3-glucuronide	m768	HMDB0010351	C05643		rpneg	C25H38O9	3	Steroids and steroid derivatives	Lipids and lipid-like molecules	11-beta-Hydroxyandrosterone-3-glucuronide	https://hmdb.ca/metabolites/HMDB0010351	Exogenous,Endogenous
Mupirocin	m769	HMDB0014554	C11758		rpneg	C26H44O9	3	Fatty Acyls	Lipids and lipid-like molecules	Mupirocin	https://hmdb.ca/metabolites/HMDB0014554
Cholic acid glucuronide	m770	HMDB0002577			rpneg	C30H48O11	3	Steroids and steroid derivatives	Lipids and lipid-like molecules	Cholic acid glucuronide	https://hmdb.ca/metabolites/HMDB0002577	Exogenous,Endogenous
isomer 1 of Cholic acid glucuronide	m771				rpneg	C30H48O11	3	Steroids and steroid derivatives	Lipids and lipid-like molecules	isomer 1 of Cholic acid glucuronide
O-Adipoylcarnitine	m772	HMDB0061677			rppos	C13H23NO6	3	Fatty Acyls	Lipids and lipid-like molecules	O-Adipoylcarnitine	https://hmdb.ca/metabolites/HMDB0061677
Nonanoylcarnitine	m773	HMDB0013288			rppos	C16H31NO4	3	Fatty Acyls	Lipids and lipid-like molecules	Nonanoylcarnitine	https://hmdb.ca/metabolites/HMDB0013288	Exogenous,Endogenous
Dimethylglycine	m774	HMDB0000092	C01026		rppos	C4H9NO2	1	Carboxylic acids and derivatives	Organic acids and derivatives	N,N-Dimethylaminoacetic acid	https://hmdb.ca/metabolites/HMDB0000092	Exogenous,Endogenous
3-Aminoisobutanoic acid	m775	HMDB0003911	C05145		rppos	C4H9NO2	1	Carboxylic acids and derivatives	Organic acids and derivatives	2-Methyl-beta-alanine	https://hmdb.ca/metabolites/HMDB0003911	Exogenous,Endogenous
N-Acetylvaline	m776	HMDB0011757			rppos	C7H13NO3	1	Carboxylic acids and derivatives	Organic acids and derivatives	N-Acetylvaline	https://hmdb.ca/metabolites/HMDB0011757	Exogenous,Endogenous
3-Dehydroxycarnitine	m777	HMDB0006831			rppos	C7H15NO2	3	Fatty Acyls	Lipids and lipid-like molecules	4-Trimethylammoniobutanoic acid	https://hmdb.ca/metabolites/HMDB0006831
N-Methylnicotinamide	m778	HMDB0003152			rppos	C7H8N2O	1	Pyridines and derivatives	Organoheterocyclic compounds	N-Methyl nicotineamide	https://hmdb.ca/metabolites/HMDB0003152	Exogenous,Endogenous
1-methylnicotinamide	m779	HMDB0000699	C02918		rppos	C7H8N2O	1	Pyridines and derivatives	Organoheterocyclic compounds	1-methylnicotinamide	https://hmdb.ca/metabolites/HMDB0000699	Exogenous,Endogenous
2-Hydroxycinnamic acid	m780	HMDB0002641	C01772		rppos	C9H8O3	1	Cinnamic acids and derivatives	Phenylpropanoids and polyketides	2-Hydroxycinnamic acid	https://hmdb.ca/metabolites/HMDB0002641	Exogenous
Homocitrulline	m781	HMDB0000679	C02427		rppos	C7H15N3O3	1	Carboxylic acids and derivatives	Organic acids and derivatives	L-Homocitrulline	https://hmdb.ca/metabolites/HMDB0000679	Exogenous,Endogenous
N6-Carbamoyl-DL-Lysine	m782	HMDB0341182			rppos	C7H15N3O3	3	Carboxylic acids and derivatives	Organic acids and derivatives	N6-Carbamoyl-DL-Lysine	https://hmdb.ca/metabolites/HMDB0341182
Guanidoacetic acid	m783	HMDB0000128	C00581		rppos	C3H7N3O2	1	Carboxylic acids and derivatives	Organic acids and derivatives	Glycocyamine	https://hmdb.ca/metabolites/HMDB0000128	Exogenous,Endogenous
Methylglutaric acid	m784	HMDB0000752			rppos	C6H10O4	1	Fatty Acyls	Lipids and lipid-like molecules	beta-Methylglutaric acid	https://hmdb.ca/metabolites/HMDB0000752	Exogenous,Endogenous
2,2-Dimethylsuccinic acid	m785	HMDB0002074			rppos	C6H10O4	1	Fatty Acyls	Lipids and lipid-like molecules	2,2-Dimethylsuccinate	https://hmdb.ca/metabolites/HMDB0002074	Exogenous,Endogenous
Phthalic acid	m786	HMDB0002107	C01606		rppos	C8H6O4	1	Benzene and substituted derivatives	Benzenoids	1,2-Benzenedicarboxylic acid	https://hmdb.ca/metabolites/HMDB0002107	Exogenous,Endogenous
Glutamylalanine	m787	HMDB0003764			rppos	C8H14N2O5	1	Carboxylic acids and derivatives	Organic acids and derivatives	alpha-Glu-ala	https://hmdb.ca/metabolites/HMDB0003764	Exogenous
Malonylcarnitine	m788	HMDB0002095			rppos	C10H17NO6	1	Fatty Acyls	Lipids and lipid-like molecules	Malonyl-carnitine	https://hmdb.ca/metabolites/HMDB0002095	Exogenous
Acetylglycine	m789	HMDB0000532			rppos	C4H7NO3	1	Carboxylic acids and derivatives	Organic acids and derivatives	Acetylglycine	https://hmdb.ca/metabolites/HMDB0000532	Exogenous,Endogenous
N-Acetyl-L-phenylalanine	m790	HMDB0000512	C03519		rppos	C11H13NO3	1	Carboxylic acids and derivatives	Organic acids and derivatives	N-Acetyl-L-phenylalanine	https://hmdb.ca/metabolites/HMDB0000512	Exogenous,Endogenous
N-acetyl-L-arginine	m791	HMDB0004620			rppos	C8H16N4O3	1	Carboxylic acids and derivatives	Organic acids and derivatives	N-a-Acetyl-L-arginine	https://hmdb.ca/metabolites/HMDB0004620	Exogenous,Endogenous
N8-Acetylspermidine	m792	HMDB0002189	C01029		rppos	C9H21N3O	1	Carboximidic acids and derivatives	Organic acids and derivatives	N8-acetylspermidine	https://hmdb.ca/metabolites/HMDB0002189	Exogenous,Endogenous
N-Acetyl-L-aspartic acid	m793	HMDB0000812	C01042		rppos	C6H9NO5	1	Carboxylic acids and derivatives	Organic acids and derivatives	N-Acetyl-L-aspartic acid	https://hmdb.ca/metabolites/HMDB0000812	Exogenous,Endogenous
N1,N8-Diacetylspermidine	m794	HMDB0041947			rppos	C11H23N3O2	1	Carboxylic acids and derivatives	Organic acids and derivatives	N1,N8-diacetylspermidine(N1,N8-DiAcSPD)	https://hmdb.ca/metabolites/HMDB0041947	Exogenous
Dopamine	m795	HMDB0000073	C03758		rppos	C8H11NO2	1	Phenols	Benzenoids	dopamine	https://hmdb.ca/metabolites/HMDB0000073	Exogenous
5-Hydroxy-L-tryptophan	m796	HMDB0000472	C00643		rppos	C11H12N2O3	1	Indoles and derivatives	Organoheterocyclic compounds	5-Hydroxy-L-tryptophan	https://hmdb.ca/metabolites/HMDB0000472
3-Methoxytyramine	m797	HMDB0000022	C05587		rppos	C9H13NO2	1	Phenols	Benzenoids	3-methoxy-p-tyramine	https://hmdb.ca/metabolites/HMDB0000022	Exogenous,Endogenous
Indolelactic acid	m798	HMDB0000671	C02043		rppos	C11H11NO3	1	Indoles and derivatives	Organoheterocyclic compounds	Indolelactic acid	https://hmdb.ca/metabolites/HMDB0000671	Exogenous,Endogenous
1H-Indole-3-carboxaldehyde	m799	HMDB0029737	C08493		rppos	C9H7NO	1	Indoles and derivatives	Organoheterocyclic compounds	Indole-3-carboxaldehyde	https://hmdb.ca/metabolites/HMDB0029737	Exogenous,Endogenous
pyroglutamylproline	m800	HMDB0341386			rppos	C10H14N2O4	1	Carboxylic acids and derivatives	Organic acids and derivatives	pyroglutamylproline	https://hmdb.ca/metabolites/HMDB0341386
3'-Deoxythymidine	m801	HMDB0246094			rppos	C10H14N2O4	1	Pyrimidine nucleosides	Nucleosides	3'-Deoxythymidine	https://hmdb.ca/metabolites/HMDB0246094
Succinic anhydride	m802	HMDB0032523	C19524		rppos	C4H4O3	3	Carboxylic acids and derivatives	Organic acids and derivatives	Succinic anhydride	https://hmdb.ca/metabolites/HMDB0032523	Exogenous,Endogenous
N-methyl-L-glutamic Acid	m803	HMDB0062660	C01046		rppos	C6H11NO4	3	Carboxylic acids and derivatives	Organic acids and derivatives	N-methyl-L-glutamic Acid	https://hmdb.ca/metabolites/HMDB0062660
N5-(L-1-Carboxyethyl)-L-ornithine	m804		C04210		rppos	C8H16N2O4	3		Unknown
Homoarginine	m805	HMDB0000670	C01924		rppos	C7H16N4O2	3	Carboxylic acids and derivatives	Organic acids and derivatives	Homo-L-arginine	https://hmdb.ca/metabolites/HMDB0000670	Exogenous
cyclic Melatonin	m806	HMDB0060811			rppos	C13H14N2O2	3	Indoles and derivatives	Organoheterocyclic compounds	cyclic Melatonin	https://hmdb.ca/metabolites/HMDB0060811
O-Desmethyl-lacosamide	m807	HMDB0060855			rppos	C12H16N2O3	3	Carboxylic acids and derivatives	Organic acids and derivatives	O-Desmethyl-lacosamide	https://hmdb.ca/metabolites/HMDB0060855
5-Methylcytidine	m808	HMDB0000982			rppos	C10H15N3O5	3	Pyrimidine nucleosides	Nucleosides	5-Methylcytidine	https://hmdb.ca/metabolites/HMDB0000982	Exogenous,Endogenous
Phe-Pro	m809			OSI00267	rppos	C14H18N2O3	3		Organic acids and derivatives
Heptanoylcarnitine	m810	HMDB0013238			rppos	C14H27NO4	3	Fatty Acyls	Lipids and lipid-like molecules	Heptanoylcarnitine	https://hmdb.ca/metabolites/HMDB0013238	Exogenous,Endogenous
Tryptophyl-Proline	m811	HMDB0029091			rppos	C16H19N3O3	3	Carboxylic acids and derivatives	Organic acids and derivatives	Tryptophyl-Proline	https://hmdb.ca/metabolites/HMDB0029091	Exogenous
Pimelylcarnitine	m812	HMDB0013328			rppos	C14H25NO6	3	Fatty Acyls	Lipids and lipid-like molecules	Pimelylcarnitine	https://hmdb.ca/metabolites/HMDB0013328	Exogenous,Endogenous
trans-2-Dodecenoylcarnitine	m813	HMDB0013326			rppos	C19H35NO4	3	Fatty Acyls	Lipids and lipid-like molecules	trans-2-Dodecenoylcarnitine	https://hmdb.ca/metabolites/HMDB0013326	Exogenous,Endogenous
3-Hydroxy-5,8-tetradecadienoylcarnitine	m814	HMDB0013332			rppos	C21H37NO5	3	Fatty Acyls	Lipids and lipid-like molecules	3-Hydroxy-5,8-tetradecadienoylcarnitine	https://hmdb.ca/metabolites/HMDB0013332
LysoPC(20:1(11Z)/0:0)	m815	HMDB0010391			rppos	C28H56NO7P	3	Glycerophospholipids	Lipids and lipid-like molecules	LysoPC(20:1(11Z)/0:0)	https://hmdb.ca/metabolites/HMDB0010391
1-Methylhypoxanthine	m816	HMDB0013141			rppos	C6H6N4O	3	Imidazopyrimidines	Organoheterocyclic compounds	1-Methylhypoxanthine	https://hmdb.ca/metabolites/HMDB0013141	Endogenous
Trihomomethionine	m817		C17221		rppos	C8H17NO2S	3		Unknown
Pentahomomethionine	m818		C17229		rppos	C10H21NO2S	3		Unknown
N-Hydroxy-L-tyrosine	m819		C03004		rppos	C9H11NO4	3		Unknown
(S)-Homostachydrine	m820	HMDB0033433	C08283		rppos	C8H15NO2	3	Carboxylic acids and derivatives	Organic acids and derivatives	(S)-Homostachydrine	https://hmdb.ca/metabolites/HMDB0033433	Exogenous,Endogenous
Methionyl-Glycine	m821	HMDB0028973			rppos	C7H14N2O3S	3	Carboxylic acids and derivatives	Organic acids and derivatives	Methionyl-Glycine	https://hmdb.ca/metabolites/HMDB0028973	Exogenous
Succinylcarnitine	m822	HMDB0061717			rppos	C11H19NO6	3	Fatty Acyls	Lipids and lipid-like molecules	Succinylcarnitine	https://hmdb.ca/metabolites/HMDB0061717
Tryptophyl-Asparagine	m823	HMDB0029078			rppos	C15H18N4O4	3	Carboxylic acids and derivatives	Organic acids and derivatives	Tryptophyl-Asparagine	https://hmdb.ca/metabolites/HMDB0029078
N-Acetyl-3-methylhistidine	m824	HMDB0240341			rppos	C9H13N3O3	3	Carboxylic acids and derivatives	Organic acids and derivatives	N-Acetyl-3-methylhistidine	https://hmdb.ca/metabolites/HMDB0240341
Guanidinosuccinic acid	m825	HMDB0003157	C03139		rppos	C5H9N3O4	3	Carboxylic acids and derivatives	Organic acids and derivatives	Guanidinosuccinic acid	https://hmdb.ca/metabolites/HMDB0003157	Exogenous,Endogenous
N(6)-Methyllysine	m826	HMDB0002038	C02728		rppos	C7H16N2O2	3	Carboxylic acids and derivatives	Organic acids and derivatives	N(6)-Methyllysine	https://hmdb.ca/metabolites/HMDB0002038	Exogenous,Endogenous
Picolinoylglycine	m827	HMDB0059766			rppos	C8H8N2O3	3	Carboxylic acids and derivatives	Organic acids and derivatives	Picolinoylglycine	https://hmdb.ca/metabolites/HMDB0059766
Oleoyl glycine	m828	HMDB0013631			rppos	C20H37NO3	3	Carboxylic acids and derivatives	Organic acids and derivatives	Oleoyl glycine	https://hmdb.ca/metabolites/HMDB0013631	Endogenous
Sulfapyridine	m829	HMDB0015028			rppos	C11H11N3O2S	3	Benzene and substituted derivatives	Benzenoids	Sulfapyridine	https://hmdb.ca/metabolites/HMDB0015028
Allantoic acid	m830	HMDB0001209	C00499		rppos	C4H8N4O4	3	Carboxylic acids and derivatives	Organic acids and derivatives	Allantoic acid	https://hmdb.ca/metabolites/HMDB0001209	Exogenous,Endogenous
Suberoyl-L-carnitine	m831	HMDB0240724			rppos	C15H27NO6	3	Carboxylic acids and derivatives	Organic acids and derivatives	Suberoyl-L-carnitine	https://hmdb.ca/metabolites/HMDB0240724
N-Acetylputrescine	m832	HMDB0002064	C02714		rppos	C6H14N2O	3	Carboximidic acids and derivatives	Organic acids and derivatives	N-Acetylputrescine	https://hmdb.ca/metabolites/HMDB0002064	Exogenous,Endogenous
N-Acetyl-S-(2-hydroxypropyl)-L-cysteine	m833	HMDB0341494			rppos	C8H15NO4S	3	Carboxylic acids and derivatives	Organic acids and derivatives	N-Acetyl-S-(2-hydroxypropyl)-L-cysteine	https://hmdb.ca/metabolites/HMDB0341494
5-Hydroxytryptophol	m834	HMDB0001855			rppos	C10H11NO2	3	Indoles and derivatives	Organoheterocyclic compounds	5-Hydroxytryptophol	https://hmdb.ca/metabolites/HMDB0001855	Exogenous,Endogenous
alpha-Methyltryptamine	m835	HMDB0245770	C20127		rppos	C11H14N2	3	Indoles and derivatives	Organoheterocyclic compounds	alpha-Methyltryptamine	https://hmdb.ca/metabolites/HMDB0245770
1,2,3,4-Tetrahydroisoquinoline	m836	HMDB0012489			rppos	C9H11N	3	Tetrahydroisoquinolines	Organoheterocyclic compounds	1,2,3,4-Tetrahydroisoquinoline	https://hmdb.ca/metabolites/HMDB0012489	Endogenous
Carbamazepine	m837	HMDB0014704	C06868		rppos	C15H12N2O	3	Benzazepines	Organoheterocyclic compounds	Carbamazepine	https://hmdb.ca/metabolites/HMDB0014704
Nafimidone	m838	HMDB0255422			rppos	C15H12N2O	3	Naphthalenes	Benzenoids	Nafimidone	https://hmdb.ca/metabolites/HMDB0255422
Procaine	m839	HMDB0014859	C07375		rppos	C13H20N2O2	3	Benzene and substituted derivatives	Benzenoids	Procaine	https://hmdb.ca/metabolites/HMDB0014859
N-(4-Aminobenzoyl)-L-glutamic acid	m840	HMDB0255007			rppos	C12H14N2O5	3	Carboxylic acids and derivatives	Organic acids and derivatives	N-(4-Aminobenzoyl)-L-glutamic acid	https://hmdb.ca/metabolites/HMDB0255007
Irbesartan	m841	HMDB0015163	C07469		rppos	C25H28N6O	3	Benzene and substituted derivatives	Benzenoids	Irbesartan	https://hmdb.ca/metabolites/HMDB0015163

## Sheet: Table S9
Table S9: Summary of metabQTLs identified in this study
locus	locus_start	locus_end	Chr	bp	SNP	REF	ALT	A1	A1_FREQ	N	BETA	SE	T_STAT	P	m_id	Metabolites	SuperClass	Reported/Novel	Novel (EAS)	Novel metabilite (EAS)	Novel association (EAS)	Novel (EUR and other)	Novel metabilite (EUR and other)	Novel association (EUR and other)
1	4756276	4756276	1	4756276	rs7518469	G	T	T	0.034204	2412	0.467638	0.0791778	5.90618	4e-09	m349	4,8 Dimethylnonanoyl carnitine	Lipids and lipid-like molecules	Novel	Novel	Novel		Novel	Novel
2	11856378	11856378	1	11856378	rs1801133	A	G	G	0.47004	2470	-0.305882	0.0273455	-11.1858	2.27e-28	m607	Gluconate 6-phosphate	Organic oxygen compounds	Novel	Novel	Novel		Novel	Novel
3	15851064	15851064	1	15851064	rs4645982	ATCCCCGCACTGACCTCACG	A	A	0.380325	2465	0.41097	0.0276153	14.882	4.95e-48	m382	4-Guanidinobutanoic acid	Organic acids and derivatives	Reported	Novel		Novel	Reported
4	21766663	21766663	1	21766663	rs1566523	C	G	G	0.463223	2420	-0.170239	0.0284616	-5.98135	2.54e-09	m587	Phosphorylcholine	Organic nitrogen compounds	Reported	Novel		Novel	Reported
5	38682207	38682207	1	38682207	rs7537377	A	G	G	0.12085	2470	-0.239743	0.0434784	-5.51407	3.87e-08	m59	Oxidized glutathione	Organic acids and derivatives	Novel	Novel	Novel		Novel	Novel
6	46870761	47395347	1	47365292	rs28597732	G	A	A	0.273746	2453	-0.358712	0.0309683	-11.5832	3.03e-30	m126	Humulinic acid A	Organic acids and derivatives	Novel	Novel	Novel		Novel	Novel
6	46870761	47395347	1	47331191	rs9429103	G	A	A	0.251478	2368	0.320591	0.0324441	9.88133	1.36e-22	m152	4-(Butan-2-yl)cyclohexane-1-carboxylic acid	Organic acids and derivatives	Novel	Novel	Novel		Novel	Novel
6	46870761	47395347	1	47395347	rs11211405	C	T	T	0.267277	2402	-0.268142	0.0318939	-8.40733	7.09e-17	m167	3-Hydroxyadipic acid	Organic acids and derivatives	Reported	Novel		Novel	Reported
6	46870761	47395347	1	47365292	rs28597732	G	A	A	0.273746	2453	-0.19803	0.0314858	-6.28949	3.76e-10	m177	Decadienedioic acid	Lipids and lipid-like molecules	Novel	Novel	Novel		Novel	Novel
6	46870761	47395347	1	47380114	rs111460215	G	GTA	GTA	0.080401	2444	-0.351169	0.0523372	-6.70975	2.41e-11	m181	Dodecanedioic acid	Lipids and lipid-like molecules	Reported	Novel		Novel	Reported
6	46870761	47395347	1	47307594	rs145290468	GTT	G	G	0.243831	2391	-0.248361	0.0332562	-7.4681	1.13e-13	m188	2-methyl-tridecanedioic acid	Lipids and lipid-like molecules	Novel	Novel	Novel		Novel	Novel
6	46870761	47395347	1	47365292	rs28597732	G	A	A	0.273746	2453	-0.235075	0.0314528	-7.47389	1.08e-13	m218	2-Hydroxydecanedioic acid	Organic acids and derivatives	Reported	Novel		Novel	Reported
6	46870761	47395347	1	47344983	rs71050068	CA	C	C	0.471702	2350	-0.173918	0.0285402	-6.0938	1.28e-09	m281	2-Carboxy-5-decanolide	Organoheterocyclic compounds	Novel	Novel	Novel		Novel	Novel
6	46870761	47395347	1	47335986	rs9429106	A	C	C	0.399326	2374	-0.169266	0.0295614	-5.72592	1.16e-08	m284	MG(0:0/14:1(9Z)/0:0)	Lipids and lipid-like molecules	Novel	Novel	Novel		Novel	Novel
6	46870761	47395347	1	47365292	rs28597732	G	A	A	0.273746	2453	-0.219661	0.0314991	-6.97355	3.96e-12	m334	3-Methylglutarylcarnitine	Lipids and lipid-like molecules	Novel	Novel		Novel	Novel		Novel
6	46870761	47395347	1	47365292	rs28597732	G	A	A	0.273746	2453	-0.294356	0.0312425	-9.42167	9.91e-21	m47	4-Methylmannonic phenylhydrazide	Organic acids and derivatives	Novel	Novel	Novel		Novel	Novel
6	46870761	47395347	1	47331191	rs9429103	G	A	A	0.251478	2368	0.248432	0.032808	7.57232	5.22e-14	m560	Limonene aldehyde	Lipids and lipid-like molecules	Novel	Novel	Novel		Novel	Novel
6	46870761	47395347	1	47365292	rs28597732	G	A	A	0.273746	2453	0.205839	0.0315674	6.52061	8.47e-11	m685	Traumatic acid	Lipids and lipid-like molecules	Reported	Novel		Novel	Reported
6	46870761	47395347	1	47365292	rs28597732	G	A	A	0.273746	2453	-0.2031	0.0315195	-6.44363	1.4e-10	m703	Deoxydihydro-artemisinin	Organoheterocyclic compounds	Novel	Novel	Novel		Novel	Novel
6	46870761	47395347	1	47365292	rs28597732	G	A	A	0.273746	2453	0.333661	0.0310889	10.7325	2.72e-26	m705	3,8-Dihydroxy-6-methoxy-7(11)-eremophilen-12,8-olide	Lipids and lipid-like molecules	Novel	Novel	Novel		Novel	Novel
6	46870761	47395347	1	46870761	rs324420	C	A	A	0.142915	2470	0.465611	0.0391178	11.9028	8.34e-32	m708	Myristoylglycine	Organic acids and derivatives	Novel	Novel	Novel		Novel	Novel
6	46870761	47395347	1	47328011	rs12561900	C	A	A	0.238608	2370	-0.242444	0.033686	-7.19718	8.21e-13	m719	7'-Carboxy-gamma-chromanol	Organoheterocyclic compounds	Novel	Novel	Novel		Novel	Novel
7	48937946	48937946	1	48937946	rs12727744	A	G	G	0.160025	2409	0.217305	0.0390939	5.55855	3.02e-08	m243	sn1 LysoPC(18:2)	Lipids and lipid-like molecules	Novel	Novel		Novel	Novel		Novel
8	53667209	53746473	1	53677731	rs113045229	A	C	C	0.274065	2379	0.555426	0.0306556	18.1182	7.92e-69	m334	3-Methylglutarylcarnitine	Lipids and lipid-like molecules	Reported	Novel		Novel	Reported
8	53667209	53746473	1	53693627	rs12082305	T	G	G	0.247112	2424	-0.207582	0.0330735	-6.27639	4.09e-10	m343	Isomer of Decatrienoylcarnitine	Lipids and lipid-like molecules	Novel	Novel	Novel		Novel	Novel
8	53667209	53746473	1	53746473	rs2297658	T	C	C	0.293416	2430	0.304641	0.0309706	9.83648	2.04e-22	m360	L-Palmitoylcarnitine	Lipids and lipid-like molecules	Novel	Novel		Novel	Novel		Novel
8	53667209	53746473	1	53695628	rs185925197	A	G	G	0.24702	2433	0.207583	0.0329621	6.29762	3.58e-10	m362	Linoelaidyl carnitine	Lipids and lipid-like molecules	Novel	Novel	Novel		Novel	Novel
8	53667209	53746473	1	53695628	rs185925197	A	G	G	0.24702	2433	0.244482	0.0329888	7.41106	1.72e-13	m363	Oleoylcarnitine	Lipids and lipid-like molecules	Novel	Novel		Novel	Novel		Novel
8	53667209	53746473	1	53703072	rs72673135	C	A	A	0.36979	2423	-0.185913	0.0289456	-6.42285	1.6e-10	m364	Stearoylcarnitine	Lipids and lipid-like molecules	Novel	Novel		Novel	Novel		Novel
8	53667209	53746473	1	53677731	rs113045229	A	C	C	0.274065	2379	-0.474328	0.0312692	-15.1692	1.11e-49	m687	Glutarylcarnitine	Lipids and lipid-like molecules	Reported	Novel		Novel	Reported
8	53667209	53746473	1	53667209	rs78923886	A	G	G	0.242597	2364	-0.425437	0.0329299	-12.9194	6.05e-37	m772	O-Adipoylcarnitine	Lipids and lipid-like molecules	Reported	Novel		Novel	Reported
8	53667209	53746473	1	53677731	rs113045229	A	C	C	0.274065	2379	0.194931	0.0323649	6.02293	1.98e-09	m812	Pimelylcarnitine	Lipids and lipid-like molecules	Novel	Novel		Novel	Novel		Novel
9	56761001	56761001	1	56761001	rs1341344	T	C	C	0.304239	2406	-0.176525	0.0312823	-5.64297	1.87e-08	m79	3-Hydroxy-4-methoxymandelate	Benzenoids	Novel	Novel	Novel		Novel	Novel
10	76205643	76232013	1	76227982	rs397862266	G	GA	GA	0.036132	2394	-0.444057	0.0762172	-5.8262	6.43e-09	m18	2-Aminoheptanoate	Organic acids and derivatives	Reported	Novel		Novel	Reported
10	76205643	76232013	1	76227982	rs397862266	G	GA	GA	0.036132	2394	-0.431269	0.0762376	-5.65691	1.72e-08	m335	Hexanoylcarnitine	Lipids and lipid-like molecules	Reported	Novel		Novel	Reported
10	76205643	76232013	1	76205643	rs12127402	C	A	A	0.0355547	2461	-0.416435	0.0755963	-5.50866	3.99e-08	m345	9-Decenoylcarnitine	Lipids and lipid-like molecules	Reported	Novel		Novel	Reported
10	76205643	76232013	1	76232013	rs141109580	T	TAA	TAA	0.0338086	2455	-0.478874	0.077458	-6.18237	7.37e-10	m663	N-Acetyl-DL-leucine	Organic acids and derivatives	Novel	Novel	Novel		Novel	Novel
11	91055034	91055034	1	91055034	rs12565520	T	C	C	0.144133	2463	0.227059	0.0403409	5.6285	2.02e-08	m520	HB(T)	Organoheterocyclic compounds	Novel	Novel	Novel		Novel	Novel
12	151836675	151995248	1	151921974	rs12095483	G	T	T	0.303453	2404	-0.183955	0.0310219	-5.92985	3.47e-09	m163	3-Hydroxyisovaleric acid	Lipids and lipid-like molecules	Reported	Novel		Novel	Reported
12	151836675	151995248	1	151995248	rs6677973	C	T	T	0.288871	2444	-0.177457	0.0309761	-5.72884	1.14e-08	m168	2-Ethyl-2-Hydroxybutyric acid	Lipids and lipid-like molecules	Novel	Novel	Novel		Novel	Novel
12	151836675	151995248	1	151859166	rs6690449	T	C	C	0.368314	2449	-0.301537	0.0286196	-10.536	2.05e-25	m176	3-Hydroxyoctanoic acid	Organic acids and derivatives	Reported	Novel		Novel	Reported
12	151836675	151995248	1	151859166	rs6690449	T	C	C	0.368314	2449	-0.463722	0.0277248	-16.7259	1.52e-59	m178	(8Z)-dec-8-enoic acid	Lipids and lipid-like molecules	Novel	Novel	Novel		Novel	Novel
12	151836675	151995248	1	151910014	rs1844543	G	A	A	0.320691	2373	-0.173594	0.0306543	-5.66294	1.67e-08	m179	Dodecadienoic acid	Lipids and lipid-like molecules	Novel	Novel	Novel		Novel	Novel
12	151836675	151995248	1	151859166	rs6690449	T	C	C	0.368314	2449	-0.326584	0.0285422	-11.4421	1.43e-29	m180	3-Oxododecanoic acid	Organic acids and derivatives	Novel	Novel	Novel		Novel	Novel
12	151836675	151995248	1	151859166	rs6690449	T	C	C	0.368314	2449	-0.195053	0.0289964	-6.72682	2.15e-11	m185	Goshuyic acid	Lipids and lipid-like molecules	Reported	Novel		Novel	Reported
12	151836675	151995248	1	151859166	rs6690449	T	C	C	0.368314	2449	-0.211601	0.0289643	-7.30558	3.72e-13	m187	3-Oxotetradecanoic acid	Lipids and lipid-like molecules	Novel	Novel	Novel		Novel	Novel
12	151836675	151995248	1	151859166	rs6690449	T	C	C	0.368314	2449	-0.20748	0.0289787	-7.15976	1.06e-12	m220	3-Hydroxydodecanoic acid	Organic acids and derivatives	Reported	Novel		Novel	Reported
12	151836675	151995248	1	151841165	rs11204906	G	A	A	0.37262	2469	0.175095	0.0288433	6.07057	1.47e-09	m352	Tridecanoylcarnitine	Lipids and lipid-like molecules	Novel	Novel	Novel		Novel	Novel
12	151836675	151995248	1	151844650	rs6684312	G	A	A	0.372065	2470	-0.35413	0.0281746	-12.5691	3.64e-35	m630	2-Hydroxydecanoate	Lipids and lipid-like molecules	Novel	Novel		Novel	Novel		Novel
12	151836675	151995248	1	151859166	rs6690449	T	C	C	0.368314	2449	-0.201181	0.0290066	-6.93569	5.15e-12	m688	5Z-Dodecenoic acid	Lipids and lipid-like molecules	Novel	Novel		Novel	Novel		Novel
12	151836675	151995248	1	151859166	rs6690449	T	C	C	0.368314	2449	-0.319152	0.0285633	-11.1735	2.63e-28	m700	L-Menthyl acetoacetate	Lipids and lipid-like molecules	Novel	Novel	Novel		Novel	Novel
12	151836675	151995248	1	151844650	rs6684312	G	A	A	0.372065	2470	0.24247	0.0286497	8.46327	4.39e-17	m773	Nonanoylcarnitine	Lipids and lipid-like molecules	Reported	Novel		Novel	Reported
12	151836675	151995248	1	151836675	rs56028913	G	C	C	0.3718	2461	0.17061	0.0289188	5.89963	4.14e-09	m812	Pimelylcarnitine	Lipids and lipid-like molecules	Reported	Novel		Novel	Reported
12	151836675	151995248	1	151844650	rs6684312	G	A	A	0.372065	2470	0.224408	0.0287092	7.81659	7.97e-15	m831	Suberoyl-L-carnitine	Organic acids and derivatives	Novel	Novel	Novel		Novel	Novel
13	171084712	171084712	1	171084712	rs2236873	A	T	T	0.377999	2459	0.245703	0.0292488	8.40045	7.42e-17	m528	L-Homocysteine	Organic acids and derivatives	Novel	Novel	Novel		Novel	Novel
14	182772897	182772897	1	182772897	rs193141545	A	G	G	0.0111336	2470	1.05518	0.134722	7.83231	7.05e-15	m118	N-Acetylneuraminic acid	Organic oxygen compounds	Reported	Novel		Novel	Reported
15	219445710	219445710	1	219445710	rs61836090	A	G	G	0.273566	2440	0.211279	0.0319287	6.61721	4.48e-11	m131	Monoethyl malonic acid	Organic acids and derivatives	Novel	Novel	Novel		Novel	Novel
16	241725996	241725996	1	241725996	rs12118651	C	T	T	0.345552	2428	0.343482	0.0293423	11.706	7.88e-31	m150	Kynurenic acid	Organoheterocyclic compounds	Reported	Novel		Novel	Reported
16	241725996	241725996	1	241725996	rs12118651	C	T	T	0.345552	2428	0.187469	0.0299141	6.26691	4.34e-10	m547	L-Kynurenine	Organic oxygen compounds	Reported	Novel		Novel	Reported
17	248039451	248039451	1	248039451	rs3811444	C	T	T	0.230162	2470	0.312083	0.0336098	9.28547	3.42e-20	m605	Spermidine	Organic nitrogen compounds	Reported	Novel		Novel	Reported
18	27730940	27730940	2	27730940	rs1260326	T	C	C	0.456478	2470	-0.171722	0.028564	-6.01182	2.11e-09	m246	sn2 LysoPE(16:0)	Lipids and lipid-like molecules	Novel	Novel		Novel	Novel		Novel
19	31786637	31975797	2	31975797	rs201769896	G	C	C	0.400693	2452	-0.211555	0.0284763	-7.42917	1.5e-13	m310	Etiocholanolone glucuronide	Lipids and lipid-like molecules	Reported	Novel		Novel	Reported
19	31786637	31975797	2	31786637	rs2300697	C	T	T	0.426989	2438	-0.170714	0.0280988	-6.07551	1.43e-09	m766	11-Oxo-androsterone glucuronide	Lipids and lipid-like molecules	Novel	Novel	Novel		Novel	Novel
20	37579971	37579971	2	37579971	rs2255991	C	T	T	0.380364	2470	-0.48041	0.0272091	-17.6562	8.55e-66	m808	5-Methylcytidine	Nucleosides	Novel	Novel	Novel		Novel	Novel
21	65212200	65223247	2	65212200	rs13396525	C	G	G	0.4481	2447	-0.153627	0.0279962	-5.48744	4.5e-08	m409	L-N-(3-Carboxypropyl)glutamine	Organic acids and derivatives	Novel	Novel	Novel		Novel	Novel
21	65212200	65223247	2	65223247	rs780077959	A	AT	AT	0.448544	2439	-0.174309	0.0279589	-6.23448	5.33e-10	m775	3-Aminoisobutanoic acid	Organic acids and derivatives	Novel	Novel		Novel	Novel		Novel
22	73675844	73893942	2	73893942	rs145289203	G	T	T	0.076939	2411	-0.474987	0.0531927	-8.92956	8.29e-19	m35	Capryloylglycine	Organic acids and derivatives	Novel	Novel	Novel		Novel	Novel
22	73675844	73893942	2	73731965	rs149150941	G	A	A	0.0819398	2392	0.306486	0.051699	5.92828	3.5e-09	m405	N2-Acetylornithine	Organic acids and derivatives	Reported	Novel		Novel	Reported
22	73675844	73893942	2	73893942	rs145289203	G	T	T	0.076939	2411	0.32721	0.0533904	6.12864	1.03e-09	m412	Tyrosine methylester	Organic acids and derivatives	Novel	Novel	Novel		Novel	Novel
22	73675844	73893942	2	73786441	rs10684777	C	CTA	CTA	0.0108514	2396	-1.01629	0.138518	-7.33693	2.98e-13	m413	L-a-Amino-1H-pyrrole-1-hexanoate	Organic acids and derivatives	Novel	Novel	Novel		Novel	Novel
22	73675844	73893942	2	73893942	rs145289203	G	T	T	0.076939	2411	0.443263	0.0532223	8.32852	1.36e-16	m413	L-a-Amino-1H-pyrrole-1-hexanoate	Organic acids and derivatives	Novel	Novel	Novel		Novel	Novel
22	73675844	73893942	2	73893942	rs145289203	G	T	T	0.076939	2411	-0.483586	0.052933	-9.13581	1.34e-19	m660	Isovalerylalanine	Organic acids and derivatives	Novel	Novel	Novel		Novel	Novel
22	73675844	73893942	2	73786441	rs10684777	C	CTA	CTA	0.0108514	2396	1.04234	0.138706	7.51474	8.01e-14	m661	N-acetyl-L-leucine	Organic acids and derivatives	Reported	Novel		Novel	Reported
22	73675844	73893942	2	73675844	rs7598901	T	C	C	0.244332	2470	0.270746	0.032608	8.30304	1.65e-16	m678	N-Acetyl-L-tyrosine	Organic acids and derivatives	Reported	Novel		Novel	Reported
22	73675844	73893942	2	73893942	rs145289203	G	T	T	0.076939	2411	-0.619471	0.052586	-11.7802	3.48e-31	m678	N-Acetyl-L-tyrosine	Organic acids and derivatives	Reported	Novel		Novel	Reported
22	73675844	73893942	2	73731965	rs149150941	G	A	A	0.0819398	2392	-0.324065	0.0518083	-6.25508	4.69e-10	m790	N-Acetyl-L-phenylalanine	Organic acids and derivatives	Reported	Novel		Novel	Reported
22	73675844	73893942	2	73786441	rs10684777	C	CTA	CTA	0.0108514	2396	0.908255	0.139111	6.529	8.06e-11	m791	N-acetyl-L-arginine	Organic acids and derivatives	Reported	Novel		Novel	Reported
22	73675844	73893942	2	73893942	rs145289203	G	T	T	0.076939	2411	-1.09061	0.0487085	-22.3906	4.95e-101	m791	N-acetyl-L-arginine	Organic acids and derivatives	Reported	Novel		Novel	Reported
22	73675844	73893942	2	73786441	rs10684777	C	CTA	CTA	0.0108514	2396	0.913712	0.139283	6.5601	6.57e-11	m824	N-Acetyl-3-methylhistidine	Organic acids and derivatives	Reported	Novel		Novel	Reported
22	73675844	73893942	2	73893942	rs145289203	G	T	T	0.076939	2411	-0.823512	0.0511562	-16.098	1.86e-55	m824	N-Acetyl-3-methylhistidine	Organic acids and derivatives	Reported	Novel		Novel	Reported
23	135616891	135723715	2	135616891	rs117363436	G	C	C	0.0141758	2469	0.921727	0.118077	7.80615	8.64e-15	m540	N-Methyl-2-pyridone-5-carboxamide	Organoheterocyclic compounds	Reported	Novel		Novel	Reported
23	135616891	135723715	2	135723715	rs62168899	G	A	A	0.116206	2388	-0.271979	0.0449559	-6.04992	1.68e-09	m540	N-Methyl-2-pyridone-5-carboxamide	Organoheterocyclic compounds	Reported	Novel		Novel	Reported
23	135616891	135723715	2	135616891	rs117363436	G	C	C	0.01417	2470	0.712432	0.118662	6.00386	2.21e-09	m779	1-methylnicotinamide	Organoheterocyclic compounds	Reported	Novel		Novel	Reported
24	136326471	136326471	2	136326471	rs150201268	G	A	A	0.0123482	2470	0.758966	0.128763	5.89429	4.28e-09	m34	gamma-Glutamylmethionine	Organic acids and derivatives	Novel	Novel		Novel	Novel		Novel
25	181038684	181038684	2	181038684	rs147948639	C	T	T	0.0257189	2469	0.493267	0.0876753	5.62606	2.05e-08	m233	2-Methyl-3-ketovaleric acid	Organic acids and derivatives	Novel	Novel	Novel		Novel	Novel
25	181038684	181038684	2	181038684	rs147948639	C	T	T	0.0257189	2469	0.499975	0.0876531	5.70402	1.31e-08	m78	Syringic acid	Benzenoids	Novel	Novel	Novel		Novel	Novel
26	211060050	211540507	2	211540507	rs1047891	C	A	A	0.159109	2470	0.362505	0.037947	9.55292	2.92e-21	m15	3-Methylcrotonylglycine	Organic acids and derivatives	Reported	Novel		Novel	Reported
26	211060050	211540507	2	211540507	rs1047891	C	A	A	0.159109	2470	0.216928	0.0383947	5.64993	1.79e-08	m151	3-Indolehydracrylic acid	Organoheterocyclic compounds	Novel	Novel	Novel		Novel	Novel
26	211060050	211540507	2	211060050	rs2286963	T	G	G	0.226316	2470	0.218912	0.0332347	6.58685	5.47e-11	m341	Dimethyl heptanoyl carnitine	Lipids and lipid-like molecules	Reported	Novel		Novel	Reported
26	211060050	211540507	2	211060050	rs2286963	T	G	G	0.226316	2470	0.205993	0.0332682	6.1919	6.94e-10	m349	4,8 Dimethylnonanoyl carnitine	Lipids and lipid-like molecules	Novel	Novel	Novel		Novel	Novel
26	211060050	211540507	2	211540507	rs1047891	C	A	A	0.159109	2470	0.463181	0.0375006	12.3513	4.75e-34	m371	Glycine	Organic acids and derivatives	Reported	Novel		Novel	Reported
26	211060050	211540507	2	211540507	rs1047891	C	A	A	0.159109	2470	0.235468	0.0383504	6.13991	9.59e-10	m617	N-Acetylthreonine	Organic acids and derivatives	Reported	Novel		Novel	Reported
26	211060050	211540507	2	211540507	rs1047891	C	A	A	0.159109	2470	0.320021	0.0381015	8.39918	7.48e-17	m650	Vinylacetylglycine	Organic acids and derivatives	Novel	Novel	Novel		Novel	Novel
26	211060050	211540507	2	211540507	rs1047891	C	A	A	0.159109	2470	0.32915	0.03807	8.6459	9.44e-18	m663	N-Acetyl-DL-leucine	Organic acids and derivatives	Novel	Novel	Novel		Novel	Novel
26	211060050	211540507	2	211540507	rs1047891	C	A	A	0.159109	2470	0.389065	0.0378403	10.2818	2.61e-24	m731	N-Butyrylglycine	Organic acids and derivatives	Reported	Novel		Novel	Reported
26	211060050	211540507	2	211540507	rs1047891	C	A	A	0.159109	2470	0.327995	0.038074	8.61467	1.23e-17	m732	Isobutyrylglycine	Organic acids and derivatives	Reported	Novel		Novel	Reported
26	211060050	211540507	2	211540507	rs1047891	C	A	A	0.159109	2470	0.283958	0.0382172	7.43011	1.49e-13	m744	5-hydroxyhexanoylglycine	Organic acids and derivatives	Novel	Novel	Novel		Novel	Novel
26	211060050	211540507	2	211540507	rs1047891	C	A	A	0.159109	2470	0.346589	0.0380072	9.11902	1.53e-19	m772	O-Adipoylcarnitine	Lipids and lipid-like molecules	Novel	Novel		Novel	Novel		Novel
26	211060050	211540507	2	211060050	rs2286963	T	G	G	0.226316	2470	0.500485	0.0319761	15.6519	1.02e-52	m773	Nonanoylcarnitine	Lipids and lipid-like molecules	Reported	Novel		Novel	Reported
26	211060050	211540507	2	211540507	rs1047891	C	A	A	0.158971	2469	0.39748	0.0378182	10.5103	2.63e-25	m789	Acetylglycine	Organic acids and derivatives	Reported	Novel		Novel	Reported
26	211060050	211540507	2	211540507	rs1047891	C	A	A	0.159109	2470	-0.306545	0.0381464	-8.03603	1.42e-15	m805	Homoarginine	Organic acids and derivatives	Reported	Novel		Novel	Reported
27	216882250	216882250	2	216882250	rs6754860	C	T	T	0.199345	2443	-0.240952	0.0353162	-6.82271	1.12e-11	m772	O-Adipoylcarnitine	Lipids and lipid-like molecules	Novel	Novel		Novel	Novel		Novel
28	234596368	234676872	2	234669144	rs4148323	G	A	A	0.199798	2470	0.234455	0.0349861	6.70138	2.55e-11	m108	27-Norcholestanehexol	Lipids and lipid-like molecules	Novel	Novel	Novel		Novel	Novel
28	234596368	234676872	2	234671462	rs28946889	G	T	T	0.399121	2389	-0.254195	0.0296137	-8.58369	1.63e-17	m109	Bilirubin	Organoheterocyclic compounds	Reported	Novel		Novel	Reported
28	234596368	234676872	2	234674476	rs929596	A	G	G	0.127126	2470	0.313623	0.0420852	7.4521	1.26e-13	m157	2-[4-(furan-2-carbonyl)piperazine-1-carbonyl]-cyclohex-1-enecarboxylic acid	Organic acids and derivatives	Novel	Novel	Novel		Novel	Novel
28	234596368	234676872	2	234627608	rs2011425	T	G	G	0.180364	2470	-0.353342	0.0365989	-9.65445	1.13e-21	m289	23S,25,26-Trihydroxyvitamin D3	Lipids and lipid-like molecules	Novel	Novel	Novel		Novel	Novel
28	234596368	234676872	2	234676872	rs34946978	C	T	T	0.0230769	2470	0.591623	0.0942921	6.27437	4.13e-10	m289	23S,25,26-Trihydroxyvitamin D3	Lipids and lipid-like molecules	Novel	Novel	Novel		Novel	Novel
28	234596368	234676872	2	234671462	rs28946889	G	T	T	0.399288	2388	-0.257811	0.0296219	-8.70341	5.89e-18	m30	Histidylthreonine	Organic acids and derivatives	Novel	Novel	Novel		Novel	Novel
28	234596368	234676872	2	234669144	rs4148323	G	A	A	0.199798	2470	0.291067	0.0348134	8.36076	1.03e-16	m31	4-(4'-Methyl[2,2'-bipyridin]-4-yl)butanoic acid	Organic acids and derivatives	Novel	Novel	Novel		Novel	Novel
28	234596368	234676872	2	234672722	rs4148324	T	G	G	0.127935	2470	0.395696	0.0417274	9.48288	5.6e-21	m31	4-(4'-Methyl[2,2'-bipyridin]-4-yl)butanoic acid	Organic acids and derivatives	Novel	Novel	Novel		Novel	Novel
28	234596368	234676872	2	234674476	rs929596	A	G	G	0.127126	2470	0.286332	0.0421639	6.79092	1.39e-11	m437	Tryptophyl-Tryptophan	Organic acids and derivatives	Novel	Novel	Novel		Novel	Novel
28	234596368	234676872	2	234674476	rs929596	A	G	G	0.127126	2470	0.28725	0.0421614	6.8131	1.2e-11	m438	Isomer of Tryptophyl-Tryptophan	Organic acids and derivatives	Novel	Novel	Novel		Novel	Novel
28	234596368	234676872	2	234671462	rs28946889	G	T	T	0.399121	2389	-0.327711	0.0293218	-11.1764	2.65e-28	m439	Arg Trp Cys His	Organic acids and derivatives	Novel	Novel	Novel		Novel	Novel
28	234596368	234676872	2	234672722	rs4148324	T	G	G	0.127935	2470	0.374835	0.0418053	8.96621	5.92e-19	m452	2-Aminobenzoic acid	Benzenoids	Novel	Novel	Novel		Novel	Novel
28	234596368	234676872	2	234671462	rs28946889	G	T	T	0.399121	2389	-0.298681	0.0293826	-10.1652	8.58e-24	m51	Imazamethabenz	Organic acids and derivatives	Novel	Novel	Novel		Novel	Novel
28	234596368	234676872	2	234674476	rs929596	A	G	G	0.127126	2470	0.39283	0.041815	9.39448	1.26e-20	m51	Imazamethabenz	Organic acids and derivatives	Novel	Novel	Novel		Novel	Novel
28	234596368	234676872	2	234671462	rs28946889	G	T	T	0.399121	2389	-0.335058	0.0292183	-11.4674	1.13e-29	m52	Isomer 1 of imazamethabenz	Organic acids and derivatives	Novel	Novel	Novel		Novel	Novel
28	234596368	234676872	2	234674476	rs929596	A	G	G	0.127126	2470	0.413635	0.0417336	9.91132	9.82e-23	m52	Isomer 1 of imazamethabenz	Organic acids and derivatives	Novel	Novel	Novel		Novel	Novel
28	234596368	234676872	2	234669144	rs4148323	G	A	A	0.199798	2470	0.29376	0.0348042	8.44036	5.31e-17	m53	Isomer 2 of imazamethabenz	Organic acids and derivatives	Novel	Novel	Novel		Novel	Novel
28	234596368	234676872	2	234674476	rs929596	A	G	G	0.127126	2470	0.404934	0.0417682	9.6948	7.74e-22	m53	Isomer 2 of imazamethabenz	Organic acids and derivatives	Novel	Novel	Novel		Novel	Novel
28	234596368	234676872	2	234671462	rs28946889	G	T	T	0.399121	2389	-0.329931	0.0292641	-11.2743	9.25e-29	m54	2-[2-(1,3-Dioxo-1,3-dihydro-isoindol-2-yl)-acetylamino]-4-methyl-pentanoic acid	Organic acids and derivatives	Novel	Novel	Novel		Novel	Novel
28	234596368	234676872	2	234674476	rs929596	A	G	G	0.127126	2470	0.427025	0.0416789	10.2456	3.74e-24	m54	2-[2-(1,3-Dioxo-1,3-dihydro-isoindol-2-yl)-acetylamino]-4-methyl-pentanoic acid	Organic acids and derivatives	Novel	Novel	Novel		Novel	Novel
28	234596368	234676872	2	234671462	rs28946889	G	T	T	0.399121	2389	-0.300642	0.0293677	-10.2372	4.22e-24	m55	Indolebutyroyl aspartic acid	Organic acids and derivatives	Novel	Novel	Novel		Novel	Novel
28	234596368	234676872	2	234674476	rs929596	A	G	G	0.127126	2470	0.400828	0.0417842	9.59281	2.02e-21	m55	Indolebutyroyl aspartic acid	Organic acids and derivatives	Novel	Novel	Novel		Novel	Novel
28	234596368	234676872	2	234669144	rs4148323	G	A	A	0.199798	2470	0.215526	0.0350354	6.15166	8.92e-10	m554	Biliverdin	Organoheterocyclic compounds	Reported	Novel		Novel	Reported
28	234596368	234676872	2	234672639	rs6742078	G	T	T	0.127733	2470	0.400178	0.0417291	9.5899	2.07e-21	m554	Biliverdin	Organoheterocyclic compounds	Reported	Novel		Novel	Reported
28	234596368	234676872	2	234596368	rs10203266	G	C	C	0.266018	2466	0.238684	0.0316565	7.53981	6.57e-14	m676	Xanthurenic acid	Organoheterocyclic compounds	Reported	Novel		Novel	Reported
28	234596368	234676872	2	234671462	rs28946889	G	T	T	0.399121	2389	-0.268883	0.0294573	-9.12788	1.45e-19	m740	3,4-Dihydroxybenzylamine	Benzenoids	Novel	Novel	Novel		Novel	Novel
28	234596368	234676872	2	234674476	rs929596	A	G	G	0.127126	2470	0.348169	0.041975	8.29467	1.77e-16	m740	3,4-Dihydroxybenzylamine	Benzenoids	Novel	Novel	Novel		Novel	Novel
28	234596368	234676872	2	234671462	rs28946889	G	T	T	0.399121	2389	-0.164895	0.0298275	-5.52828	3.59e-08	m806	cyclic Melatonin	Organoheterocyclic compounds	Novel	Novel	Novel		Novel	Novel
28	234596368	234676872	2	234669144	rs4148323	G	A	A	0.199798	2470	0.268202	0.0348877	7.68757	2.15e-14	m823	Tryptophyl-Asparagine	Organic acids and derivatives	Novel	Novel	Novel		Novel	Novel
28	234596368	234676872	2	234674476	rs929596	A	G	G	0.127126	2470	0.387591	0.0418348	9.26481	4.12e-20	m823	Tryptophyl-Asparagine	Organic acids and derivatives	Novel	Novel	Novel		Novel	Novel
28	234596368	234676872	2	234625622	rs1875263	C	T	T	0.120243	2470	-0.679749	0.0415308	-16.3673	3.04e-57	m97	3b,4b,7a,12a-Tetrahydroxy-5b-cholanoate	Lipids and lipid-like molecules	Novel	Novel	Novel		Novel	Novel
28	234596368	234676872	2	234637905	rs45625338	C	T	T	0.0518219	2470	0.760937	0.0627893	12.1189	7.06e-33	m97	3b,4b,7a,12a-Tetrahydroxy-5b-cholanoate	Lipids and lipid-like molecules	Novel	Novel	Novel		Novel	Novel
29	241780634	241780634	2	241780634	rs4600645	A	G	G	0.06508	2374	-0.330237	0.059202	-5.57814	2.71e-08	m393	3-Pyrrolidineacetic acid	Organoheterocyclic compounds	Novel	Novel	Novel		Novel	Novel
30	30768667	30768667	3	30768667	rs147693330	TTTCCCAAATTTG	T	T	0.478448	2436	0.179479	0.028139	6.37829	2.14e-10	m280	Acetylcarnosine	Organic acids and derivatives	Reported	Novel		Novel	Reported
31	42935133	42935133	3	42935133	rs36026296	CA	C	C	0.172478	2409	-0.248353	0.0381666	-6.50707	9.29e-11	m727	Cholestane-3,7,12,25-tetrol-3-glucuronide	Lipids and lipid-like molecules	Novel	Novel	Novel		Novel	Novel
32	51991251	51991251	3	51991251	rs1566941	T	C	C	0.0814095	2469	0.298757	0.0514762	5.80378	7.31e-09	m653	N-Acetyl-L-glutamic acid	Organic acids and derivatives	Reported	Novel		Novel	Reported
32	51991251	51991251	3	51991251	rs1566941	T	C	C	0.0814095	2469	0.315721	0.051428	6.13909	9.64e-10	m655	N-Acetyl-L-methionine	Organic acids and derivatives	Reported	Novel		Novel	Reported
33	55548726	55548726	3	55548726	rs13314106	A	C	C	0.0990246	2358	-0.269303	0.0481028	-5.59849	2.41e-08	m263	2-Hydroxy-3-(sulfooxy)benzoate	Organic acids and derivatives	Novel	Novel	Novel		Novel	Novel
34	69472527	69472527	3	69472527	rs137995539	AC	A	A	0.247371	2377	-0.182713	0.0329615	-5.54323	3.3e-08	m72	3-Hydroxybenzoic acid	Benzenoids	Novel	Novel	Novel		Novel	Novel
35	110931595	110931595	3	110931595	rs79707660	G	A	A	0.0939271	2470	-0.271665	0.0479859	-5.66135	1.68e-08	m794	N1,N8-Diacetylspermidine	Organic acids and derivatives	Novel	Novel	Novel		Novel	Novel
36	137284576	137284576	3	137284576	rs4678351	C	T	T	0.202074	2363	0.210157	0.0363739	5.77767	8.57e-09	m800	pyroglutamylproline	Organic acids and derivatives	Novel	Novel	Novel		Novel	Novel
37	149146239	149146239	3	149146239	rs117105095	C	T	T	0.0162095	2406	-0.616275	0.11275	-5.46585	5.08e-08	m805	Homoarginine	Organic acids and derivatives	Novel	Novel		Novel	Novel		Novel
38	182823498	182823498	3	182823498	rs13059546	A	G	G	0.46701	2425	-0.161168	0.0282397	-5.70714	1.29e-08	m163	3-Hydroxyisovaleric acid	Lipids and lipid-like molecules	Reported	Novel		Novel	Reported
39	187430527	187430527	3	187430527	rs75385421	C	T	T	0.0720648	2470	0.315687	0.0542982	5.81395	6.89e-09	m41	N-lactoyl-Phenylalanine	Organic acids and derivatives	Novel	Novel	Novel		Novel	Novel
40	195955762	195961685	3	195960910	rs76966283	A	G	G	0.0564123	2464	-0.349203	0.0617721	-5.65309	1.76e-08	m300	16alpha-Hydroxy DHEA 3-sulfate	Lipids and lipid-like molecules	Reported	Novel		Novel	Reported
40	195955762	195961685	3	195955762	rs939885	A	G	G	0.235425	2470	-0.222002	0.0328997	-6.74786	1.86e-11	m301	Androsterone sulfate	Lipids and lipid-like molecules	Reported	Novel		Novel	Reported
40	195955762	195961685	3	195955762	rs939885	A	G	G	0.235425	2470	-0.249638	0.0328193	-7.60645	3.98e-14	m302	Epiandrosterone Sulfate	Lipids and lipid-like molecules	Reported	Novel		Novel	Reported
40	195955762	195961685	3	195961685	rs1044988	A	G	G	0.1218	2422	-0.243672	0.0437081	-5.57499	2.75e-08	m74	2,6-Dihydroxybenzoic acid	Benzenoids	Reported	Novel		Novel	Reported
41	15737863	15737863	4	15737863	rs4273468	A	G	G	0.482996	2470	-0.214667	0.0284598	-7.5428	6.43e-14	m808	5-Methylcytidine	Nucleosides	Novel	Novel	Novel		Novel	Novel
42	31491190	31491190	4	31491190	rs422846	A	G	G	0.3159	2390	-0.182913	0.0308313	-5.93271	3.41e-09	m365	Arachidonoylcarnitine	Lipids and lipid-like molecules	Novel	Novel		Novel	Novel		Novel
43	55477167	55477167	4	55477167	rs2537880	C	T	T	0.0967675	2413	-0.274486	0.0482909	-5.68402	1.47e-08	m213	(S)-3-Hydroxyisobutyric acid	Organic acids and derivatives	Novel	Novel	Novel		Novel	Novel
44	61313952	61313952	4	61313952	rs34114007	GTT	G	G	0.222593	2399	0.217996	0.0349385	6.23943	5.18e-10	m611	Dihydrotestosterone	Lipids and lipid-like molecules	Novel	Novel	Novel		Novel	Novel
45	69365052	69968825	4	69533217	rs1349852	C	A	A	0.48091	2462	-0.780114	0.0236918	-32.9275	2.53e-197	m124	MHPG Glucuronide	Organic oxygen compounds	Novel	Novel	Novel		Novel	Novel
45	69365052	69968825	4	69533784	rs192628779	A	G	G	0.0133603	2470	-1.41165	0.121509	-11.6177	2.04e-30	m124	MHPG Glucuronide	Organic oxygen compounds	Novel	Novel	Novel		Novel	Novel
45	69365052	69968825	4	69968825	rs34407256	AT	A	A	0.350892	2411	-0.38864	0.0291132	-13.3493	2.87e-39	m124	MHPG Glucuronide	Organic oxygen compounds	Novel	Novel	Novel		Novel	Novel
45	69365052	69968825	4	69419270	rs7434408	G	A	A	0.0607632	2411	-0.408152	0.0616731	-6.61799	4.47e-11	m301	Androsterone sulfate	Lipids and lipid-like molecules	Reported	Novel		Novel	Reported
45	69365052	69968825	4	69421476	rs28828487	C	A	A	0.0450102	2455	0.486345	0.0692685	7.02116	2.84e-12	m309	Androsterone glucuronide	Lipids and lipid-like molecules	Reported	Novel		Novel	Reported
45	69365052	69968825	4	69419298	rs7438492	T	C	C	0.047166	2470	0.496542	0.0677923	7.32446	3.23e-13	m310	Etiocholanolone glucuronide	Lipids and lipid-like molecules	Reported	Novel		Novel	Reported
45	69365052	69968825	4	69370630	rs3100649	T	G	G	0.156402	2468	0.534168	0.0374001	14.2825	1.6e-44	m311	Fusicoccin H	Lipids and lipid-like molecules	Novel	Novel	Novel		Novel	Novel
45	69365052	69968825	4	69365052	rs2603153	T	G	G	0.156275	2470	1.25258	0.0296348	42.2673	3.51e-294	m317	Deoxycholic acid 3-glucuronide	Lipids and lipid-like molecules	Reported	Novel		Novel	Reported
45	69365052	69968825	4	69537475	rs9994887	G	A	A	0.480567	2470	0.183333	0.0280434	6.53747	7.58e-11	m594	Syringaldehyde	Benzenoids	Novel	Novel	Novel		Novel	Novel
45	69365052	69968825	4	69536084	rs1902023	C	A	A	0.480644	2454	0.168108	0.0282296	5.95504	2.97e-09	m625	Homovanillic acid	Benzenoids	Novel	Novel	Novel		Novel	Novel
45	69365052	69968825	4	69537475	rs9994887	G	A	A	0.480567	2470	0.207683	0.0279745	7.42401	1.56e-13	m63	Pro Tyr Tyr Val	Organic acids and derivatives	Novel	Novel	Novel		Novel	Novel
45	69365052	69968825	4	69533217	rs1349852	C	A	A	0.48091	2462	0.504733	0.0265057	19.0424	1.58e-75	m64	Thr Leu Phe Tyr	Organic acids and derivatives	Novel	Novel	Novel		Novel	Novel
45	69365052	69968825	4	69533784	rs192628779	A	G	G	0.0133603	2470	1.26665	0.122155	10.3692	1.09e-24	m64	Thr Leu Phe Tyr	Organic acids and derivatives	Novel	Novel	Novel		Novel	Novel
45	69365052	69968825	4	69365052	rs2603153	T	G	G	0.156275	2470	1.02063	0.0330435	30.8874	2.14e-177	m720	Ethyl 7-epi-12-hydroxyjasmonate glucoside	Lipids and lipid-like molecules	Novel	Novel	Novel		Novel	Novel
45	69365052	69968825	4	69420765	rs7666864	G	A	A	0.0416328	2462	0.435591	0.0719606	6.05319	1.64e-09	m761	Tobramycin	Organic oxygen compounds	Novel	Novel	Novel		Novel	Novel
45	69365052	69968825	4	69532128	rs1531022	A	G	G	0.480364	2470	-0.243161	0.0279401	-8.70294	5.8e-18	m767	11-ketoetiocholanolone glucuronide	Unknown	Novel	Novel	Novel		Novel	Novel
45	69365052	69968825	4	69365052	rs2603153	T	G	G	0.156275	2470	0.38431	0.0381327	10.0782	1.95e-23	m769	Mupirocin	Lipids and lipid-like molecules	Novel	Novel	Novel		Novel	Novel
45	69365052	69968825	4	69536084	rs1902023	C	A	A	0.480644	2454	0.361356	0.0274112	13.1828	2.16e-38	m79	3-Hydroxy-4-methoxymandelate	Benzenoids	Novel	Novel	Novel		Novel	Novel
46	89052323	89054667	4	89052323	rs2231142	G	T	T	0.295951	2470	0.222072	0.0309232	7.18142	9.09e-13	m759	N6-Carbamoyl-L-threonyladenosine	Nucleosides	Novel	Novel	Novel		Novel	Novel
46	89052323	89054667	4	89054667	rs4148155	A	G	G	0.296154	2470	0.17416	0.0310195	5.61453	2.19e-08	m769	Mupirocin	Lipids and lipid-like molecules	Novel	Novel	Novel		Novel	Novel
47	100190185	100275013	4	100224036	rs35333426	A	G	G	0.249182	2444	0.186769	0.0326318	5.72354	1.17e-08	m196	13(S)-HpOTrE	Lipids and lipid-like molecules	Novel	Novel	Novel		Novel	Novel
47	100190185	100275013	4	100275013	rs11499825	G	A	A	0.423559	2394	0.213287	0.0287974	7.40646	1.79e-13	m199	11-HpODE	Lipids and lipid-like molecules	Novel	Novel	Novel		Novel	Novel
47	100190185	100275013	4	100190185	rs4269183	A	G	G	0.143175	2469	0.285175	0.0396679	7.18907	8.61e-13	m719	7'-Carboxy-gamma-chromanol	Organoheterocyclic compounds	Novel	Novel	Novel		Novel	Novel
48	147301224	147301224	4	147301224	rs148411506	T	C	C	0.0510121	2470	-0.385335	0.0651614	-5.91354	3.81e-09	m48	N-Acetyl-L-leucyl-L-proline	Organic acids and derivatives	Novel	Novel	Novel		Novel	Novel
49	159621185	159621185	4	159621185	rs6856561	A	T	T	0.141569	2384	-0.301364	0.0410926	-7.33378	3.05e-13	m174	Valproic Acid	Lipids and lipid-like molecules	Novel	Novel	Novel		Novel	Novel
49	159621185	159621185	4	159621185	rs6856561	A	T	T	0.141569	2384	-0.230873	0.041274	-5.59368	2.48e-08	m18	2-Aminoheptanoate	Organic acids and derivatives	Novel	Novel		Novel	Novel		Novel
49	159621185	159621185	4	159621185	rs6856561	A	T	T	0.141569	2384	-0.301316	0.0411664	-7.31947	3.39e-13	m338	L-Octanoylcarnitine	Lipids and lipid-like molecules	Reported	Novel		Novel	Reported
49	159621185	159621185	4	159621185	rs6856561	A	T	T	0.141569	2384	-0.240356	0.0413062	-5.81889	6.72e-09	m345	9-Decenoylcarnitine	Lipids and lipid-like molecules	Reported	Novel		Novel	Reported
49	159621185	159621185	4	159621185	rs6856561	A	T	T	0.141569	2384	-0.307171	0.0411457	-7.46544	1.16e-13	m347	O-decanoyl-L-carnitine	Lipids and lipid-like molecules	Reported	Novel		Novel	Reported
50	187125460	187125492	4	187125492	rs4997687	T	C	C	0.418046	2416	-0.182809	0.0290209	-6.29921	3.54e-10	m703	Deoxydihydro-artemisinin	Organoheterocyclic compounds	Novel	Novel	Novel		Novel	Novel
50	187125460	187125492	4	187125460	rs4997688	T	C	C	0.415359	2357	-0.26251	0.0289128	-9.07938	2.25e-19	m761	Tobramycin	Organic oxygen compounds	Novel	Novel	Novel		Novel	Novel
51	195139	195139	5	195139	rs118046653	C	T	T	0.0269558	2467	0.703645	0.0866151	8.12382	7.06e-16	m129	Succinic acid	Organic acids and derivatives	Reported	Reported			Novel		Novel
51	195139	195139	5	195139	rs118046653	C	T	T	0.0269558	2467	0.481241	0.0872651	5.5147	3.86e-08	m734	5-Methylthioribulose 1-phosphate	Organic oxygen compounds	Novel	Novel	Novel		Novel	Novel
52	1183560	1225688	5	1183560	rs11750211	C	T	T	0.275304	2470	0.283019	0.0312527	9.05583	2.68e-19	m386	Methionine sulfone	Organic acids and derivatives	Reported	Novel		Novel	Reported
52	1183560	1225688	5	1225688	rs7728814	C	T	T	0.421748	2460	-0.180349	0.0289218	-6.23576	5.28e-10	m386	Methionine sulfone	Organic acids and derivatives	Reported	Novel		Novel	Reported
52	1183560	1225688	5	1188285	rs11133665	G	A	A	0.275493	2383	0.191737	0.0321255	5.96838	2.75e-09	m824	N-Acetyl-3-methylhistidine	Organic acids and derivatives	Novel	Novel		Novel	Novel		Novel
53	34974835	35040230	5	35039486	rs37370	T	C	C	0.45	2470	0.235088	0.0280248	8.38855	8.17e-17	m408	Asymmetric dimethylarginine	Organic acids and derivatives	Reported	Novel		Novel	Reported
53	34974835	35040230	5	35039486	rs37370	T	C	C	0.45	2470	0.271366	0.0278917	9.72928	5.58e-22	m775	3-Aminoisobutanoic acid	Organic acids and derivatives	Reported	Reported			Reported
53	34974835	35040230	5	34974835	rs251642	A	G	G	0.309362	2350	-0.312298	0.0311112	-10.0381	3.03e-23	m782	N6-Carbamoyl-DL-Lysine	Organic acids and derivatives	Novel	Novel	Novel		Novel	Novel
53	34974835	35040230	5	35037115	rs37369	T	C	C	0.414338	2469	0.486986	0.0273295	17.8191	6.56e-67	m782	N6-Carbamoyl-DL-Lysine	Organic acids and derivatives	Novel	Novel	Novel		Novel	Novel
53	34974835	35040230	5	35039486	rs37370	T	C	C	0.450182	2469	-0.589428	0.0258357	-22.8145	1.08e-104	m782	N6-Carbamoyl-DL-Lysine	Organic acids and derivatives	Novel	Novel	Novel		Novel	Novel
53	34974835	35040230	5	35040230	rs37371	G	A	A	0.445172	2444	0.252345	0.0283371	8.90511	1.02e-18	m805	Homoarginine	Organic acids and derivatives	Reported	Novel		Novel	Reported
54	35965970	35965970	5	35965970	rs3756669	A	C	C	0.402834	2470	0.184663	0.028993	6.36923	2.26e-10	m305	Pregnenolone sulfate	Lipids and lipid-like molecules	Reported	Novel		Novel	Reported
54	35965970	35965970	5	35965970	rs3756669	A	C	C	0.402834	2470	0.314675	0.0285358	11.0274	1.23e-27	m306	Pregnanolone sulfate	Lipids and lipid-like molecules	Novel	Novel	Novel		Novel	Novel
54	35965970	35965970	5	35965970	rs3756669	A	C	C	0.402834	2470	0.239748	0.0288292	8.31615	1.48e-16	m307	5a-Pregnan-3b,20b-diol 20-sulfate	Lipids and lipid-like molecules	Novel	Novel	Novel		Novel	Novel
55	53090477	53488338	5	53488338	rs78459601	T	C	C	0.044332	2470	0.375878	0.0683401	5.50011	4.19e-08	m296	9-Methyluric acid	Organoheterocyclic compounds	Novel	Novel	Novel		Novel	Novel
55	53090477	53488338	5	53090477	rs77201166	A	T	T	0.0123865	2422	0.739177	0.127653	5.79051	7.93e-09	m417	Leucylproline	Organic acids and derivatives	Novel	Novel	Novel		Novel	Novel
56	78312166	78643644	5	78315741	rs490270	A	C	C	0.165567	2425	-0.37145	0.0374011	-9.93154	8.23e-23	m379	gamma-Aminobutyric acid	Organic acids and derivatives	Novel	Novel		Novel	Novel		Novel
56	78312166	78643644	5	78352091	rs4512118	G	C	C	0.0729972	2459	0.516201	0.0540678	9.54728	3.09e-21	m379	gamma-Aminobutyric acid	Organic acids and derivatives	Novel	Novel		Novel	Novel		Novel
56	78312166	78643644	5	78643644	rs13179278	A	G	G	0.0711297	2390	0.344284	0.0553055	6.22513	5.67e-10	m379	gamma-Aminobutyric acid	Organic acids and derivatives	Novel	Novel		Novel	Novel		Novel
56	78312166	78643644	5	78312166	rs190335	T	C	C	0.377331	2413	-0.21197	0.0293231	-7.22876	6.51e-13	m383	Betaine	Organic acids and derivatives	Reported	Novel		Novel	Reported
56	78312166	78643644	5	78315741	rs490270	A	C	C	0.165567	2425	-0.357332	0.0375126	-9.52563	3.83e-21	m774	Dimethylglycine	Organic acids and derivatives	Reported	Novel		Novel	Reported
56	78312166	78643644	5	78352091	rs4512118	G	C	C	0.0729972	2459	0.511387	0.0540866	9.45497	7.28e-21	m774	Dimethylglycine	Organic acids and derivatives	Reported	Novel		Novel	Reported
56	78312166	78643644	5	78643644	rs13179278	A	G	G	0.0711297	2390	0.346303	0.0551429	6.2801	4.01e-10	m774	Dimethylglycine	Organic acids and derivatives	Reported	Novel		Novel	Reported
57	90289914	90289914	5	90289914	rs4916836	G	A	A	0.423711	2425	-0.158433	0.0285981	-5.53998	3.35e-08	m24	L-Tyrosine	Organic acids and derivatives	Novel	Novel		Novel	Novel		Novel
58	114972261	114972261	5	114972261	rs78609967	T	G	G	0.0235635	2419	-0.519589	0.0945484	-5.49548	4.3e-08	m697	S-(5-Adenosy)-L-homocysteine	Organoheterocyclic compounds	Novel	Novel		Novel	Novel		Novel
59	131330427	131656700	5	131595642	rs34992375	C	CTTAT	CTTAT	0.499577	2366	-0.336333	0.0285239	-11.7913	3.19e-31	m224	Indoleacrylic acid	Organoheterocyclic compounds	Novel	Novel	Novel		Novel	Novel
59	131330427	131656700	5	131656700	rs270602	T	C	C	0.402108	2467	-0.445451	0.0277634	-16.0445	3.53e-55	m224	Indoleacrylic acid	Organoheterocyclic compounds	Novel	Novel	Novel		Novel	Novel
59	131330427	131656700	5	131330427	rs17132267	T	C	C	0.0477377	2409	0.557186	0.0666295	8.36246	1.03e-16	m365	Arachidonoylcarnitine	Lipids and lipid-like molecules	Reported	Novel		Novel	Reported
59	131330427	131656700	5	131623268	rs162891	C	T	T	0.498573	2452	-0.367376	0.0278475	-13.1924	1.92e-38	m427	Lenticin	Organic acids and derivatives	Reported	Novel		Novel	Reported
59	131330427	131656700	5	131656700	rs270602	T	C	C	0.402108	2467	-0.488182	0.0274551	-17.7811	1.21e-66	m427	Lenticin	Organic acids and derivatives	Reported	Novel		Novel	Reported
59	131330427	131656700	5	131595642	rs34992375	C	CTTAT	CTTAT	0.499577	2366	-0.336234	0.0284903	-11.8017	2.83e-31	m702	Phenylbutyrylglutamine	Organic acids and derivatives	Novel	Novel	Novel		Novel	Novel
59	131330427	131656700	5	131656700	rs270602	T	C	C	0.402108	2467	-0.436037	0.0278176	-15.6749	7.35e-53	m702	Phenylbutyrylglutamine	Organic acids and derivatives	Novel	Novel	Novel		Novel	Novel
60	154111762	154111762	5	154111762	rs57870047	A	AAAAG	AAAAG	0.12375	2400	0.242989	0.0436559	5.566	2.9e-08	m103	Lithocholyltaurine	Lipids and lipid-like molecules	Novel	Novel	Novel		Novel	Novel
61	1943154	1943154	6	1943154	rs3800144	T	G	G	0.154399	2364	0.22923	0.0402033	5.70177	1.33e-08	m812	Pimelylcarnitine	Lipids and lipid-like molecules	Novel	Novel		Novel	Novel		Novel
62	4119704	4145692	6	4119704	rs7757606	G	A	A	0.363286	2465	0.21693	0.029388	7.38159	2.13e-13	m108	27-Norcholestanehexol	Lipids and lipid-like molecules	Novel	Novel	Novel		Novel	Novel
62	4119704	4145692	6	4145692	rs548574654	C	CTGTTTT	CTGTTTT	0.289249	2465	0.305146	0.0307145	9.93492	7.84e-23	m346	cis-4-Decenoylcarnitine	Lipids and lipid-like molecules	Novel	Novel		Novel	Novel		Novel
63	16288615	16294722	6	16288615	rs2327958	G	A	A	0.112394	2469	-0.458084	0.0441344	-10.3793	9.87e-25	m257	Xanthosine	Nucleosides	Reported	Novel		Novel	Reported
63	16288615	16294722	6	16294722	rs7765828	G	C	C	0.112348	2470	-0.307087	0.0446505	-6.87758	7.69e-12	m568	Oxypurinol	Organoheterocyclic compounds	Novel	Novel	Novel		Novel	Novel
64	25807603	26072664	6	25840485	rs6905614	A	C	C	0.202758	2466	0.219234	0.0349128	6.27948	4e-10	m121	2-Phenylethyl b-D-glucopyranoside	Organic oxygen compounds	Novel	Novel	Novel		Novel	Novel
64	25807603	26072664	6	25840485	rs6905614	A	C	C	0.202758	2466	0.192675	0.0349787	5.50835	4e-08	m154	3-(2,3,4-trimethoxyphenyl)propanoic acid	Organic acids and derivatives	Novel	Novel	Novel		Novel	Novel
64	25807603	26072664	6	25840485	rs6905614	A	C	C	0.202758	2466	0.19797	0.0349683	5.66141	1.68e-08	m448	Dillapiol	Organoheterocyclic compounds	Novel	Novel	Novel		Novel	Novel
64	25807603	26072664	6	25807603	rs2817188	G	A	A	0.184915	2466	0.361192	0.0358199	10.0836	1.85e-23	m47	4-Methylmannonic phenylhydrazide	Organic acids and derivatives	Novel	Novel	Novel		Novel	Novel
64	25807603	26072664	6	25807603	rs2817188	G	A	A	0.184915	2466	-0.277498	0.0360765	-7.69195	2.08e-14	m618	N-acetyltryptophan	Organic acids and derivatives	Reported	Novel		Novel	Reported
64	25807603	26072664	6	25836380	rs1165183	G	A	A	0.204173	2444	0.317674	0.0347894	9.13134	1.38e-19	m720	Ethyl 7-epi-12-hydroxyjasmonate glucoside	Lipids and lipid-like molecules	Novel	Novel	Novel		Novel	Novel
64	25807603	26072664	6	25818588	rs1185567	G	A	A	0.184818	2470	0.203156	0.036253	5.60383	2.33e-08	m748	Dihydroxyphenylacetic acid sulfate	Unknown	Novel	Novel	Novel		Novel	Novel
64	25807603	26072664	6	26072664	rs34522384	GA	G	G	0.157392	2462	0.221959	0.0380482	5.83361	6.14e-09	m753	N-Phenylacetylglutamic acid	Organic acids and derivatives	Reported	Novel		Novel	Reported
64	25807603	26072664	6	25904067	rs7767546	C	T	T	0.132603	2466	-0.264774	0.0411862	-6.42871	1.54e-10	m837	Carbamazepine	Organoheterocyclic compounds	Novel	Novel	Novel		Novel	Novel
65	31585692	31597708	6	31585692	rs2857696	A	G	G	0.126772	2469	-0.240245	0.0428034	-5.61275	2.21e-08	m283	C16 Sphingosine-1-phosphate	Organic acids and derivatives	Novel	Novel	Novel		Novel	Novel
65	31585692	31597708	6	31597708	rs2736163	C	T	T	0.12834	2470	-0.236794	0.0427238	-5.54243	3.3e-08	m286	Sphingosine 1-phosphate	Lipids and lipid-like molecules	Reported	Novel		Novel	Reported
65	31585692	31597708	6	31585692	rs2857696	A	G	G	0.126772	2469	-0.265715	0.0427427	-6.21663	5.95e-10	m615	C17 Sphingosine-1-phosphate	Lipids and lipid-like molecules	Novel	Novel	Novel		Novel	Novel
66	89846345	89846345	6	89846345	rs1796731	C	T	T	0.231802	2459	0.22421	0.0335509	6.6827	2.89e-11	m280	Acetylcarnosine	Organic acids and derivatives	Reported	Novel		Novel	Reported
67	131871605	131893559	6	131893559	rs2781666	G	T	T	0.320705	2468	0.186445	0.0303601	6.14113	9.52e-10	m398	L-Arginine	Organic acids and derivatives	Reported	Novel		Novel	Reported
67	131871605	131893559	6	131871605	rs2608916	T	G	G	0.3147	2415	0.182813	0.0309242	5.91165	3.87e-09	m805	Homoarginine	Organic acids and derivatives	Reported	Novel		Novel	Reported
68	132690825	132690825	6	132690825	rs75454512	A	G	G	0.432305	2430	0.263708	0.0283632	9.29757	3.1e-20	m103	Lithocholyltaurine	Lipids and lipid-like molecules	Novel	Novel	Novel		Novel	Novel
69	168481899	168481899	6	168481899	rs59961338	C	G	G	0.190446	2397	-0.203497	0.0369167	-5.51234	3.92e-08	m502	sn2 LysoPC(20:5)	Lipids and lipid-like molecules	Novel	Novel	Novel		Novel	Novel
70	2577816	2577816	7	2577816	rs61729932	G	A	A	0.0101095	2374	0.793988	0.143533	5.53174	3.52e-08	m367	N-(1-Deoxy-1-fructosyl)isoleucine	Organic oxygen compounds	Novel	Novel	Novel		Novel	Novel
70	2577816	2577816	7	2577816	rs61729932	G	A	A	0.0101095	2374	0.87553	0.143672	6.09396	1.28e-09	m522	5'-Methylthioadenosine	Nucleosides	Novel	Novel		Novel	Novel		Novel
70	2577816	2577816	7	2577816	rs61729932	G	A	A	0.010118	2372	0.816153	0.144485	5.64872	1.81e-08	m596	Naringenin	Phenylpropanoids and polyketides	Novel	Novel		Novel	Novel		Novel
71	56079094	56079094	7	56079094	rs4947534	C	T	T	0.276952	2421	-0.305071	0.0314871	-9.68878	8.33e-22	m1	L-Serine	Organic acids and derivatives	Reported	Novel		Novel	Reported
72	87008359	87022264	7	87008359	rs140773521	A	G	G	0.034413	2470	-0.560759	0.0776901	-7.21789	7e-13	m219	3-Hydroxycapric acid	Organic acids and derivatives	Novel	Novel		Novel	Novel		Novel
72	87008359	87022264	7	87022264	rs143172549	C	A	A	0.0347395	2418	-0.51218	0.0769274	-6.65796	3.42e-11	m237	3-Oxodecanoic acid	Organic acids and derivatives	Novel	Novel	Novel		Novel	Novel
73	92640344	92640344	7	92640344	rs10244152	A	T	T	0.241257	2402	-0.182997	0.0330615	-5.53506	3.45e-08	m64	Thr Leu Phe Tyr	Organic acids and derivatives	Novel	Novel	Novel		Novel	Novel
74	99217424	99270539	7	99266318	rs4646450	G	A	A	0.273097	2457	-0.26041	0.0314957	-8.2681	2.2e-16	m301	Androsterone sulfate	Lipids and lipid-like molecules	Reported	Novel		Novel	Reported
74	99217424	99270539	7	99266318	rs4646450	G	A	A	0.273097	2457	-0.235406	0.0315745	-7.45557	1.23e-13	m302	Epiandrosterone Sulfate	Lipids and lipid-like molecules	Reported	Novel		Novel	Reported
74	99217424	99270539	7	99217424	rs10282706	G	A	A	0.267262	2462	-0.176329	0.0318147	-5.54236	3.3e-08	m694	(S,E)-Lyratol propanoate	Organic acids and derivatives	Novel	Novel	Novel		Novel	Novel
74	99217424	99270539	7	99270539	rs776746	C	T	T	0.269838	2470	-0.242507	0.0315138	-7.69526	2.03e-14	m698	2,2,4,4-Tetramethyl-6-(1-oxobutyl)-1,3,5-cyclohexanetrione	Lipids and lipid-like molecules	Novel	Novel	Novel		Novel	Novel
75	137798593	137799288	7	137798593	rs2306847	T	A	A	0.331575	2464	-0.197145	0.0301608	-6.53646	7.63e-11	m310	Etiocholanolone glucuronide	Lipids and lipid-like molecules	Reported	Novel		Novel	Reported
75	137798593	137799288	7	137799288	rs9642091	C	T	T	0.331374	2467	-0.241931	0.0300173	-8.05972	1.18e-15	m63	Pro Tyr Tyr Val	Organic acids and derivatives	Novel	Novel	Novel		Novel	Novel
75	137798593	137799288	7	137799288	rs9642091	C	T	T	0.331374	2467	-0.220718	0.030092	-7.33478	3e-13	m65	Thr Leu Tyr Phe	Organic acids and derivatives	Novel	Novel	Novel		Novel	Novel
76	141797564	141797564	7	141797564	rs11976181	C	T	T	0.154534	2459	0.269416	0.0394324	6.83236	1.05e-11	m465	2-Deoxygalactopyranose	Organic oxygen compounds	Novel	Novel		Novel	Novel		Novel
76	141797564	141797564	7	141797564	rs11976181	C	T	T	0.154534	2459	0.252698	0.0394992	6.39753	1.88e-10	m657	1,3,7-Trimethyluric acid	Organoheterocyclic compounds	Novel	Novel		Novel	Novel		Novel
77	150557665	150557665	7	150557665	rs1049793	G	C	C	0.457538	2461	0.249148	0.0283947	8.77445	3.15e-18	m792	N8-Acetylspermidine	Organic acids and derivatives	Reported	Novel		Novel	Reported
78	8119868	8119868	8	8119868	rs698291	G	T	T	0.115496	2420	-0.251495	0.0444075	-5.66335	1.66e-08	m808	5-Methylcytidine	Nucleosides	Novel	Novel	Novel		Novel	Novel
79	10283748	10283748	8	10283748	rs7005363	C	T	T	0.474889	2469	0.157554	0.028255	5.57615	2.73e-08	m528	L-Homocysteine	Organic acids and derivatives	Novel	Novel	Novel		Novel	Novel
80	18244662	18273300	8	18244662	rs10095072	T	G	G	0.454354	2377	0.158306	0.0288753	5.48241	4.64e-08	m736	3-Methylxanthine	Organoheterocyclic compounds	Novel	Novel		Novel	Novel		Novel
80	18244662	18273300	8	18273300	rs1495743	G	C	C	0.424563	2459	-0.454806	0.0272819	-16.6706	3.39e-59	m832	N-Acetylputrescine	Organic acids and derivatives	Reported	Novel		Novel	Reported
81	31835829	31835829	8	31835829	rs13276200	A	G	G	0.0734558	2396	-0.297968	0.0543095	-5.48648	4.53e-08	m629	alpha-Hydroxyisobutyric acid	Organic acids and derivatives	Novel	Novel		Novel	Novel		Novel
82	39787729	39787729	8	39787729	rs141743929	G	A	A	0.0136986	2409	-0.667382	0.120848	-5.52251	3.7e-08	m299	DHEAS	Lipids and lipid-like molecules	Novel	Novel		Novel	Novel		Novel
83	41639766	41639766	8	41639766	rs117765817	G	A	A	0.0548583	2470	-0.359949	0.0626774	-5.74289	1.05e-08	m387	Ornithine	Organic acids and derivatives	Novel	Novel		Novel	Novel		Novel
84	64597922	64597922	8	64597922	rs148420778	C	G	G	0.014387	2398	-0.652101	0.117981	-5.52719	3.61e-08	m758	Indoxyl glucuronide	Organic oxygen compounds	Novel	Novel	Novel		Novel	Novel
85	72722475	72722475	8	72722475	rs10089527	G	T	T	0.0574143	2421	0.339335	0.0620289	5.47061	4.95e-08	m772	O-Adipoylcarnitine	Lipids and lipid-like molecules	Novel	Novel		Novel	Novel		Novel
86	90977768	90977768	8	90977768	rs9650098	G	A	A	0.420786	2468	0.178265	0.0285884	6.23557	5.28e-10	m66	Benzenebutanoic acid	Benzenoids	Novel	Novel	Novel		Novel	Novel
87	109817528	109817528	8	109817528	rs190380756	G	A	A	0.0172065	2470	-0.599997	0.108405	-5.53478	3.45e-08	m33	Leucyl-Aspartate	Organic acids and derivatives	Novel	Novel	Novel		Novel	Novel
88	6665097	6665097	9	6665097	rs1658973	A	T	T	0.119724	2464	-0.410868	0.0434755	-9.45057	7.57e-21	m772	O-Adipoylcarnitine	Lipids and lipid-like molecules	Novel	Novel		Novel	Novel		Novel
89	26776610	26776610	9	26776610	rs148278397	C	G	G	0.0142566	2455	-0.661528	0.120263	-5.50067	4.18e-08	m145	4-Hydroxyphenylpyruvic acid*	Benzenoids	Novel	Novel		Novel	Novel		Novel
90	107519449	107519449	9	107519449	rs10820723	A	G	G	0.258811	2355	-0.183671	0.0328451	-5.59203	2.5e-08	m161	2-Ethylhydracrylic acid	Lipids and lipid-like molecules	Reported	Novel		Novel	Reported
91	116151191	116151191	9	116151191	rs1805313	A	G	G	0.414372	2470	0.285285	0.0278558	10.2415	3.9e-24	m652	N-Acetyl-L-glutamate 5-semialdehyde	Organic acids and derivatives	Novel	Novel	Novel		Novel	Novel
92	131613637	131871927	9	131613637	rs2805098	T	C	C	0.350061	2451	-0.210524	0.0298525	-7.05214	2.28e-12	m117	N-Acetylmuramate	Organic oxygen compounds	Novel	Novel	Novel		Novel	Novel
92	131613637	131871927	9	131702702	rs76191089	T	C	C	0.0129555	2470	0.95425	0.125204	7.62153	3.55e-14	m524	1-Methylguanosine	Nucleosides	Reported	Novel		Novel	Reported
92	131613637	131871927	9	131702702	rs76191089	T	C	C	0.0129555	2470	1.45552	0.123234	11.811	2.35e-31	m571	Guanine	Organoheterocyclic compounds	Reported	Novel		Novel	Reported
92	131613637	131871927	9	131865998	rs3780690	G	A	A	0.303644	2470	-0.203266	0.0306064	-6.6413	3.81e-11	m571	Guanine	Organoheterocyclic compounds	Reported	Novel		Novel	Reported
92	131613637	131871927	9	131614082	rs2805099	C	A	A	0.345979	2425	-0.187468	0.030138	-6.22031	5.83e-10	m644	2-Hydroxybenzeneacetic acid	Benzenoids	Reported	Novel		Novel	Reported
92	131613637	131871927	9	131613637	rs2805098	T	C	C	0.350061	2451	-0.217353	0.0298231	-7.28808	4.22e-13	m682	Indolepyruvate*	Organoheterocyclic compounds	Novel	Novel	Novel		Novel	Novel
92	131613637	131871927	9	131617167	rs2759013	A	G	G	0.34796	2427	-0.165086	0.0301553	-5.47453	4.84e-08	m798	Indolelactic acid	Organoheterocyclic compounds	Reported	Novel		Novel	Reported
92	131613637	131871927	9	131871927	rs10988209	G	A	A	0.400373	2414	-0.226236	0.0283421	-7.98231	2.2e-15	m822	Succinylcarnitine	Lipids and lipid-like molecules	Reported	Novel		Novel	Reported
93	133306881	133306881	9	133306881	rs41302663	G	A	A	0.0855049	2456	-0.396307	0.050283	-7.88154	4.82e-15	m825	Guanidinosuccinic acid	Organic acids and derivatives	Novel	Novel		Novel	Novel		Novel
94	2925958	2925958	10	2925958	rs10794962	C	T	T	0.0810531	2412	0.291756	0.0530707	5.4975	4.26e-08	m400	1-Methylhistidine	Organic acids and derivatives	Novel	Novel		Novel	Novel		Novel
95	5244898	5250453	10	5244898	rs147644597	TC	T	T	0.118839	2394	0.255087	0.044524	5.7292	1.14e-08	m305	Pregnenolone sulfate	Lipids and lipid-like molecules	Reported	Novel		Novel	Reported
95	5244898	5250453	10	5250453	rs1931679	C	T	T	0.0981781	2470	-0.288088	0.0476697	-6.04342	1.74e-09	m766	11-Oxo-androsterone glucuronide	Lipids and lipid-like molecules	Novel	Novel	Novel		Novel	Novel
96	12132978	12132978	10	12132978	rs7073177	G	C	C	0.307157	2445	0.350838	0.031014	11.3122	5.91e-29	m236	Oxoadipic acid*	Organic acids and derivatives	Novel	Novel	Novel		Novel	Novel
97	15089701	15089701	10	15089701	rs148503784	CA	C	C	0.0632729	2426	0.333443	0.0587484	5.67577	1.55e-08	m145	4-Hydroxyphenylpyruvic acid*	Benzenoids	Novel	Novel		Novel	Novel		Novel
98	45954807	45954807	10	45954807	rs2279433	A	G	G	0.052257	2459	0.449949	0.0638747	7.04424	2.41e-12	m365	Arachidonoylcarnitine	Lipids and lipid-like molecules	Reported	Novel		Novel	Reported
99	51582894	51582894	10	51582894	rs41306524	C	T	T	0.0529144	2419	0.36366	0.0648842	5.60475	2.32e-08	m365	Arachidonoylcarnitine	Lipids and lipid-like molecules	Novel	Novel		Novel	Novel		Novel
100	65764195	65764195	10	65764195	rs2255596	T	C	C	0.20894	2405	-0.192365	0.035144	-5.47364	4.87e-08	m637	sn2 LysoPE(18:3)	Lipids and lipid-like molecules	Novel	Novel	Novel		Novel	Novel
101	91461268	91461268	10	91461268	rs9325444	G	T	T	0.416116	2420	0.176223	0.0291312	6.04928	1.68e-09	m791	N-acetyl-L-arginine	Organic acids and derivatives	Reported	Novel		Novel	Reported
102	96561988	96750759	10	96653917	rs371611349	C	A	A	0.0447731	2468	-0.607361	0.0686771	-8.84372	1.73e-18	m11	D-xylo-Form	Organic acids and derivatives	Novel	Novel	Novel		Novel	Novel
102	96561988	96750759	10	96561988	rs113546720	G	A	A	0.0449757	2468	0.436711	0.0691107	6.31901	3.11e-10	m269	4-Allylphenol sulfate	Organic acids and derivatives	Reported	Novel		Novel	Reported
102	96561988	96750759	10	96750759	rs1505	G	C	C	0.387854	2470	-0.221071	0.0292626	-7.55474	5.87e-14	m308	Stanolone glucuronate	Lipids and lipid-like molecules	Novel	Novel	Novel		Novel	Novel
102	96561988	96750759	10	96748492	rs9332238	G	A	A	0.0463563	2470	0.58815	0.0673728	8.72978	4.61e-18	m718	Gibberellin A44	Lipids and lipid-like molecules	Novel	Novel	Novel		Novel	Novel
102	96561988	96750759	10	96731595	rs199850072	C	CA	CA	0.0446574	2452	0.48987	0.0693433	7.06441	2.09e-12	m722	Pregnanediol	Lipids and lipid-like molecules	Novel	Novel	Novel		Novel	Novel
103	100159136	100159136	10	100159136	rs4488133	T	A	A	0.415182	2470	0.3067	0.0283786	10.8074	1.24e-26	m826	N(6)-Methyllysine	Organic acids and derivatives	Reported	Novel		Novel	Reported
104	101578641	101578641	10	101578641	rs56220353	C	T	T	0.0141758	2469	0.695351	0.118722	5.85699	5.34e-09	m316	Chenodeoxycholic acid 3-glucuronide	Lipids and lipid-like molecules	Novel	Novel	Novel		Novel	Novel
104	101578641	101578641	10	101578641	rs56220353	C	T	T	0.0141758	2469	0.676781	0.118706	5.70131	1.33e-08	m475	N-Palmitoyl Glutamine	Lipids and lipid-like molecules	Novel	Novel	Novel		Novel	Novel
104	101578641	101578641	10	101578641	rs56220353	C	T	T	0.0141758	2469	0.670822	0.118785	5.64735	1.82e-08	m727	Cholestane-3,7,12,25-tetrol-3-glucuronide	Lipids and lipid-like molecules	Novel	Novel	Novel		Novel	Novel
105	106063962	106063962	10	106063962	rs148138343	C	T	T	0.0138544	2418	-0.697235	0.123033	-5.66704	1.63e-08	m564	Lumichrome	Organoheterocyclic compounds	Novel	Novel	Novel		Novel	Novel
106	122542280	122542280	10	122542280	rs80347955	T	C	C	0.0433549	2468	0.395344	0.0703773	5.61749	2.15e-08	m435	Tryptophyl-Phenylalanine	Organic acids and derivatives	Novel	Novel	Novel		Novel	Novel
107	131990714	131990714	10	131990714	rs10829705	C	T	T	0.0128676	2448	-0.699978	0.124921	-5.60337	2.34e-08	m115	Glucosamine 6-sulfate	Organic oxygen compounds	Novel	Novel	Novel		Novel	Novel
108	135197680	135197680	10	135197680	rs3747879	G	A	A	0.0827935	2470	0.491777	0.0515317	9.54319	3.2e-21	m527	Apronal	Organic acids and derivatives	Novel	Novel	Novel		Novel	Novel
108	135197680	135197680	10	135197680	rs3747879	G	A	A	0.0827935	2470	0.495434	0.0515175	9.61681	1.61e-21	m580	2-Acetyl-D1-piperideine	Organoheterocyclic compounds	Novel	Novel	Novel		Novel	Novel
108	135197680	135197680	10	135197680	rs3747879	G	A	A	0.0826915	2467	0.325316	0.0521179	6.24193	5.07e-10	m792	N8-Acetylspermidine	Organic acids and derivatives	Reported	Novel		Novel	Reported
108	135197680	135197680	10	135197680	rs3747879	G	A	A	0.0827935	2470	0.631937	0.0509087	12.4131	2.3e-34	m794	N1,N8-Diacetylspermidine	Organic acids and derivatives	Novel	Novel	Novel		Novel	Novel
109	18335905	18335905	11	18335905	rs10832919	A	G	G	0.455433	2457	0.307718	0.028044	10.9727	2.21e-27	m169	2-Methyl-3-hydroxyvaleric acid	Lipids and lipid-like molecules	Novel	Novel	Novel		Novel	Novel
109	18335905	18335905	11	18335905	rs10832919	A	G	G	0.455433	2457	0.164556	0.0285236	5.7691	8.97e-09	m170	Leucinic acid	Lipids and lipid-like molecules	Novel	Novel		Novel	Novel		Novel
109	18335905	18335905	11	18335905	rs10832919	A	G	G	0.455433	2457	0.421862	0.0274243	15.3828	4.76e-51	m626	2-Hydroxy-3-methylbutyric acid	Lipids and lipid-like molecules	Reported	Novel		Novel	Reported
109	18335905	18335905	11	18335905	rs10832919	A	G	G	0.455433	2457	0.279836	0.0281283	9.94855	6.89e-23	m738	4-Methylcatechol sulfate	Organic acids and derivatives	Novel	Novel	Novel		Novel	Novel
110	30538212	30538212	11	30538212	rs16920865	A	G	G	0.0238866	2470	-0.511392	0.0929548	-5.50151	4.15e-08	m662	N-Acetylisoleucine	Organic acids and derivatives	Novel	Novel		Novel	Novel		Novel
111	43838654	43838654	11	43838654	rs2863026	G	A	A	0.207455	2468	-0.259926	0.0342747	-7.58361	4.73e-14	m65	Thr Leu Tyr Phe	Organic acids and derivatives	Novel	Novel	Novel		Novel	Novel
112	58467063	58540807	11	58478159	rs117149346	C	T	T	0.0224696	2470	-1.0757	0.0937656	-11.4722	1.02e-29	m15	3-Methylcrotonylglycine	Organic acids and derivatives	Novel	Novel		Novel	Novel		Novel
112	58467063	58540807	11	58481781	rs625951	A	G	G	0.203164	2434	-0.480605	0.034164	-14.0676	2.85e-43	m15	3-Methylcrotonylglycine	Organic acids and derivatives	Novel	Novel		Novel	Novel		Novel
112	58467063	58540807	11	58478084	rs675815	C	T	T	0.208097	2470	-0.198542	0.0346083	-5.73681	1.08e-08	m617	N-Acetylthreonine	Organic acids and derivatives	Novel	Novel		Novel	Novel		Novel
112	58467063	58540807	11	58478159	rs117149346	C	T	T	0.0224696	2470	-0.551893	0.0955899	-5.77355	8.74e-09	m617	N-Acetylthreonine	Organic acids and derivatives	Novel	Novel		Novel	Novel		Novel
112	58467063	58540807	11	58469004	rs1786841	C	T	T	0.203764	2444	-0.335207	0.0347758	-9.6391	1.32e-21	m650	Vinylacetylglycine	Organic acids and derivatives	Novel	Novel	Novel		Novel	Novel
112	58467063	58540807	11	58478159	rs117149346	C	T	T	0.0224696	2470	-1.03945	0.0939311	-11.0661	8.16e-28	m650	Vinylacetylglycine	Organic acids and derivatives	Novel	Novel	Novel		Novel	Novel
112	58467063	58540807	11	58478159	rs117149346	C	T	T	0.0224696	2470	-0.929991	0.0943949	-9.85213	1.73e-22	m663	N-Acetyl-DL-leucine	Organic acids and derivatives	Novel	Novel	Novel		Novel	Novel
112	58467063	58540807	11	58481781	rs625951	A	G	G	0.203164	2434	-0.262143	0.0352411	-7.43856	1.4e-13	m663	N-Acetyl-DL-leucine	Organic acids and derivatives	Novel	Novel	Novel		Novel	Novel
112	58467063	58540807	11	58478159	rs117149346	C	T	T	0.0224696	2470	-0.800569	0.0948744	-8.43819	5.41e-17	m731	N-Butyrylglycine	Organic acids and derivatives	Novel	Novel		Novel	Novel		Novel
112	58467063	58540807	11	58490221	rs499891	T	C	C	0.201076	2417	-0.36386	0.0350948	-10.3679	1.13e-24	m731	N-Butyrylglycine	Organic acids and derivatives	Novel	Novel		Novel	Novel		Novel
112	58467063	58540807	11	58478159	rs117149346	C	T	T	0.0224696	2470	-0.782971	0.0949339	-8.24753	2.6e-16	m732	Isobutyrylglycine	Organic acids and derivatives	Novel	Novel		Novel	Novel		Novel
112	58467063	58540807	11	58540807	rs76622899	G	T	T	0.20063	2380	-0.324674	0.0356439	-9.10881	1.72e-19	m732	Isobutyrylglycine	Organic acids and derivatives	Novel	Novel		Novel	Novel		Novel
112	58467063	58540807	11	58469004	rs1786841	C	T	T	0.203764	2444	-0.19654	0.0351496	-5.59154	2.5e-08	m744	5-hydroxyhexanoylglycine	Organic acids and derivatives	Novel	Novel	Novel		Novel	Novel
112	58467063	58540807	11	58478159	rs117149346	C	T	T	0.0224696	2470	-0.799636	0.0948776	-8.42808	5.88e-17	m744	5-hydroxyhexanoylglycine	Organic acids and derivatives	Novel	Novel	Novel		Novel	Novel
112	58467063	58540807	11	58467063	rs7117149	A	G	G	0.205724	2411	-0.334107	0.0348289	-9.59281	2.06e-21	m789	Acetylglycine	Organic acids and derivatives	Reported	Novel		Novel	Reported
112	58467063	58540807	11	58478159	rs117149346	C	T	T	0.0224787	2469	-0.976094	0.0942062	-10.3612	1.18e-24	m789	Acetylglycine	Organic acids and derivatives	Reported	Novel		Novel	Reported
113	61565908	61619829	11	61581656	rs174559	G	A	A	0.334751	2469	-0.306351	0.0290808	-10.5345	2.06e-25	m202	Eicosapentaenoic acid	Lipids and lipid-like molecules	Reported	Novel		Novel	Reported
113	61565908	61619829	11	61580635	rs174556	C	T	T	0.337449	2470	-0.387596	0.0285764	-13.5635	1.79e-40	m203	Arachidonic acid	Lipids and lipid-like molecules	Reported	Novel		Novel	Reported
113	61565908	61619829	11	61581656	rs174559	G	A	A	0.334751	2469	-0.194684	0.0294628	-6.6078	4.76e-11	m209	FFA C22:5	Lipids and lipid-like molecules	Reported	Novel		Novel	Reported
113	61565908	61619829	11	61593816	rs174568	C	T	T	0.346154	2470	0.183336	0.0291815	6.28261	3.92e-10	m243	sn1 LysoPC(18:2)	Lipids and lipid-like molecules	Reported	Novel		Novel	Reported
113	61565908	61619829	11	61592362	rs174566	A	G	G	0.346436	2455	0.262792	0.0290169	9.05651	2.68e-19	m249	sn2 LysoPE(18:2)	Lipids and lipid-like molecules	Reported	Novel		Novel	Reported
113	61565908	61619829	11	61619829	rs174594	A	C	C	0.352519	2441	-0.26948	0.0289	-9.32456	2.42e-20	m252	sn2 LysoPE(20:4)	Lipids and lipid-like molecules	Novel	Novel	Novel		Novel	Novel
113	61565908	61619829	11	61581656	rs174559	G	A	A	0.334751	2469	-0.295499	0.0291262	-10.1455	1.01e-23	m365	Arachidonoylcarnitine	Lipids and lipid-like molecules	Reported	Novel		Novel	Reported
113	61565908	61619829	11	61605499	rs174578	T	A	A	0.347571	2470	-0.214172	0.0289775	-7.39095	1.99e-13	m492	LysoPC(P-16:0/0:0)	Lipids and lipid-like molecules	Reported	Novel		Novel	Reported
113	61565908	61619829	11	61581656	rs174559	G	A	A	0.334751	2469	-0.371858	0.0287689	-12.9257	4.99e-37	m498	sn1 LysoPC(18:3)	Lipids and lipid-like molecules	Novel	Novel	Novel		Novel	Novel
113	61565908	61619829	11	61591995	rs57668028	GAA	G	G	0.338987	2447	-0.365498	0.0287745	-12.7022	7.61e-36	m502	sn2 LysoPC(20:5)	Lipids and lipid-like molecules	Novel	Novel	Novel		Novel	Novel
113	61565908	61619829	11	61581656	rs174559	G	A	A	0.334751	2469	-0.403926	0.0285935	-14.1265	1.25e-43	m503	sn1 LysoPC(20:5)	Lipids and lipid-like molecules	Reported	Novel		Novel	Reported
113	61565908	61619829	11	61571348	rs174548	C	G	G	0.338259	2470	-0.48518	0.0279304	-17.371	7.37e-64	m504	sn2 LysoPC(20:4)	Lipids and lipid-like molecules	Reported	Novel		Novel	Reported
113	61565908	61619829	11	61571348	rs174548	C	G	G	0.338259	2470	-0.636523	0.0266706	-23.8661	1.91e-113	m505	sn1 LysoPC(20:4)	Lipids and lipid-like molecules	Reported	Novel		Novel	Reported
113	61565908	61619829	11	61581450	rs7394579	A	G	G	0.321578	2396	-0.176896	0.0304433	-5.81068	7.05e-09	m508	sn2 LysoPC(22:6)	Lipids and lipid-like molecules	Novel	Novel	Novel		Novel	Novel
113	61565908	61619829	11	61581450	rs7394579	A	G	G	0.321443	2397	-0.191057	0.0303603	-6.29299	3.69e-10	m509	sn1 LysoPC(22:6)	Lipids and lipid-like molecules	Novel	Novel		Novel	Novel		Novel
113	61565908	61619829	11	61571348	rs174548	C	G	G	0.338128	2468	-0.354234	0.0287455	-12.3231	6.62e-34	m510	sn2 LysoPC(22:5)	Lipids and lipid-like molecules	Novel	Novel	Novel		Novel	Novel
113	61565908	61619829	11	61581656	rs174559	G	A	A	0.334751	2469	-0.356156	0.02885	-12.3451	5.12e-34	m511	sn1 LysoPC(22:5)	Lipids and lipid-like molecules	Reported	Novel		Novel	Reported
113	61565908	61619829	11	61581450	rs7394579	A	G	G	0.321443	2397	-0.305047	0.0300105	-10.1647	8.6e-24	m512	LysoPC(22:4)	Lipids and lipid-like molecules	Reported	Novel		Novel	Reported
113	61565908	61619829	11	61594920	rs3834458	CT	C	C	0.345951	2470	0.273606	0.0288629	9.4795	5.78e-21	m514	sn1 LysoPE(18:2)	Lipids and lipid-like molecules	Reported	Novel		Novel	Reported
113	61565908	61619829	11	61571348	rs174548	C	G	G	0.338259	2470	-0.343178	0.028771	-11.9279	6.27e-32	m515	sn1 LysoPE(20:4)	Lipids and lipid-like molecules	Reported	Novel		Novel	Reported
113	61565908	61619829	11	61565908	rs174541	T	C	C	0.351669	2427	0.221559	0.0291881	7.59072	4.51e-14	m635	sn2 LysoPC(20:2)	Lipids and lipid-like molecules	Novel	Novel	Novel		Novel	Novel
113	61565908	61619829	11	61581656	rs174559	G	A	A	0.334481	2468	-0.283487	0.0291954	-9.71002	6.71e-22	m636	sn1 LysoPE(18:3)	Lipids and lipid-like molecules	Novel	Novel	Novel		Novel	Novel
113	61565908	61619829	11	61591995	rs57668028	GAA	G	G	0.338987	2447	-0.256121	0.0292985	-8.74179	4.18e-18	m638	sn1 LysoPE(20:5)	Lipids and lipid-like molecules	Novel	Novel	Novel		Novel	Novel
113	61565908	61619829	11	61571348	rs174548	C	G	G	0.338259	2470	-0.211951	0.0292795	-7.23891	6.01e-13	m640	sn1 LysoPE(22:4)	Lipids and lipid-like molecules	Novel	Novel	Novel		Novel	Novel
113	61565908	61619829	11	61571348	rs174548	C	G	G	0.338259	2470	-0.246548	0.0291695	-8.45225	4.81e-17	m642	sn2 LysoPE(22:5)	Lipids and lipid-like molecules	Novel	Novel	Novel		Novel	Novel
113	61565908	61619829	11	61591995	rs57668028	GAA	G	G	0.338987	2447	-0.253561	0.0292998	-8.65404	8.85e-18	m711	Stearidonic acid	Lipids and lipid-like molecules	Reported	Novel		Novel	Reported
113	61565908	61619829	11	61567753	rs174544	C	A	A	0.33888	2464	-0.220703	0.029287	-7.53587	6.77e-14	m719	7'-Carboxy-gamma-chromanol	Organoheterocyclic compounds	Novel	Novel	Novel		Novel	Novel
113	61565908	61619829	11	61580635	rs174556	C	T	T	0.337449	2470	-0.249158	0.0291947	-8.53436	2.42e-17	m764	Adrenic acid	Lipids and lipid-like molecules	Reported	Novel		Novel	Reported
114	62825146	62842566	11	62842566	rs4963346	G	C	C	0.0886999	2469	1.12064	0.044066	25.431	6.66e-127	m308	Stanolone glucuronate	Lipids and lipid-like molecules	Novel	Novel	Novel		Novel	Novel
114	62825146	62842566	11	62825146	rs4556543	G	A	A	0.0880923	2469	0.443027	0.0488103	9.07651	2.23e-19	m309	Androsterone glucuronide	Lipids and lipid-like molecules	Reported	Novel		Novel	Reported
114	62825146	62842566	11	62838978	rs1944046	T	G	G	0.0884974	2469	0.393381	0.0489021	8.04425	1.33e-15	m761	Tobramycin	Organic oxygen compounds	Novel	Novel	Novel		Novel	Novel
115	67109136	67414492	11	67398862	rs1531514	T	A	A	0.339271	2470	0.198009	0.0296077	6.68775	2.79e-11	m15	3-Methylcrotonylglycine	Organic acids and derivatives	Novel	Novel		Novel	Novel		Novel
115	67109136	67414492	11	67109136	rs144286967	C	T	T	0.0130986	2443	0.790781	0.123403	6.40812	1.76e-10	m618	N-acetyltryptophan	Organic acids and derivatives	Reported	Novel		Novel	Reported
115	67109136	67414492	11	67410074	rs2290960	G	A	A	0.0346154	2470	0.843004	0.0764373	11.0287	1.21e-27	m618	N-acetyltryptophan	Organic acids and derivatives	Reported	Novel		Novel	Reported
115	67109136	67414492	11	67414492	rs948445	T	C	C	0.243117	2470	-0.323849	0.0323405	-10.0137	3.65e-23	m618	N-acetyltryptophan	Organic acids and derivatives	Reported	Novel		Novel	Reported
115	67109136	67414492	11	67398862	rs1531514	T	A	A	0.339271	2470	0.179561	0.0296553	6.05495	1.62e-09	m650	Vinylacetylglycine	Organic acids and derivatives	Novel	Novel	Novel		Novel	Novel
115	67109136	67414492	11	67410074	rs2290960	G	A	A	0.0346154	2470	0.601352	0.0773569	7.77374	1.11e-14	m678	N-Acetyl-L-tyrosine	Organic acids and derivatives	Reported	Novel		Novel	Reported
115	67109136	67414492	11	67414492	rs948445	T	C	C	0.243117	2470	-0.319887	0.0323565	-9.88632	1.25e-22	m678	N-Acetyl-L-tyrosine	Organic acids and derivatives	Reported	Novel		Novel	Reported
115	67109136	67414492	11	67354986	rs640777	C	T	T	0.325629	2423	0.205908	0.0303134	6.79266	1.38e-11	m731	N-Butyrylglycine	Organic acids and derivatives	Novel	Novel		Novel	Novel		Novel
115	67109136	67414492	11	67398862	rs1531514	T	A	A	0.339271	2470	0.223665	0.0295335	7.57327	5.11e-14	m732	Isobutyrylglycine	Organic acids and derivatives	Novel	Novel		Novel	Novel		Novel
115	67109136	67414492	11	67331942	rs55740781	C	CT	CT	0.335905	2398	0.181367	0.0303947	5.96707	2.77e-09	m789	Acetylglycine	Organic acids and derivatives	Reported	Novel		Novel	Reported
115	67109136	67414492	11	67410074	rs2290960	G	A	A	0.0346154	2470	0.660934	0.0771597	8.5658	1.86e-17	m790	N-Acetyl-L-phenylalanine	Organic acids and derivatives	Reported	Novel		Novel	Reported
116	75550797	75550797	11	75550797	rs34538746	GA	G	G	0.184668	2361	-0.209578	0.0366934	-5.71159	1.26e-08	m507	sn1 LysoPC(20:3)	Lipids and lipid-like molecules	Reported	Novel		Novel	Reported
117	89167943	89167943	11	89167943	rs143649604	TA	T	T	0.19145	2421	-0.235411	0.0364499	-6.45848	1.27e-10	m395	L-Cystine	Organic acids and derivatives	Reported	Novel		Novel	Reported
118	89865836	89896457	11	89865836	rs77034589	G	A	A	0.0758205	2407	-0.684689	0.0517181	-13.2389	1.14e-38	m37	Beta-Citryl-L-glutamic acid	Organic acids and derivatives	Reported	Novel		Novel	Reported
118	89865836	89896457	11	89896457	rs489009	C	T	T	0.480093	2361	-0.420588	0.0278091	-15.1241	2.15e-49	m37	Beta-Citryl-L-glutamic acid	Organic acids and derivatives	Reported	Novel		Novel	Reported
119	92697981	92697981	11	92697981	rs10466351	C	T	T	0.425843	2461	0.156831	0.0284613	5.51033	3.95e-08	m467	Phlorin	Organic oxygen compounds	Novel	Novel	Novel		Novel	Novel
120	110169564	110169564	11	110169564	rs11213345	A	G	G	0.38027	2443	0.169827	0.0295839	5.74054	1.06e-08	m398	L-Arginine	Organic acids and derivatives	Novel	Novel		Novel	Novel		Novel
121	116662579	116662579	11	116662579	rs651821	T	C	C	0.288259	2470	-0.184858	0.031519	-5.86498	5.09e-09	m244	sn1 LysoPE(16:1)	Lipids and lipid-like molecules	Novel	Novel	Novel		Novel	Novel
121	116662579	116662579	11	116662579	rs651821	T	C	C	0.288259	2470	-0.220407	0.0314262	-7.01347	2.99e-12	m507	sn1 LysoPC(20:3)	Lipids and lipid-like molecules	Novel	Novel		Novel	Novel		Novel
122	278376	355842	12	278376	rs2291920	C	T	T	0.383706	2412	-0.208443	0.0295767	-7.04753	2.37e-12	m383	Betaine	Organic acids and derivatives	Reported	Novel		Novel	Reported
122	278376	355842	12	355842	rs7969761	C	T	T	0.219433	2470	0.219797	0.033771	6.50845	9.16e-11	m388	Pyroglutamine	Organic acids and derivatives	Reported	Novel		Novel	Reported
122	278376	355842	12	355842	rs7969761	C	T	T	0.219433	2470	0.32825	0.0334125	9.82415	2.27e-22	m473	Acetylcholine	Organic nitrogen compounds	Novel	Novel	Novel		Novel	Novel
123	4449254	4449254	12	4449254	rs7134591	A	G	G	0.442691	2408	-0.162551	0.0290161	-5.6021	2.36e-08	m215	2,4-Dihydroxybutanoic acid	Organic acids and derivatives	Novel	Novel	Novel		Novel	Novel
124	21011481	21380630	12	21014094	rs557250003	A	G	G	0.0540155	2453	0.356203	0.0635435	5.60566	2.31e-08	m108	27-Norcholestanehexol	Lipids and lipid-like molecules	Novel	Novel	Novel		Novel	Novel
124	21011481	21380630	12	21380630	rs4149083	A	T	T	0.1012	2416	0.288128	0.0480409	5.99755	2.3e-09	m108	27-Norcholestanehexol	Lipids and lipid-like molecules	Novel	Novel	Novel		Novel	Novel
124	21011481	21380630	12	21368797	rs2900478	T	A	A	0.102834	2470	0.274877	0.0472749	5.81444	6.87e-09	m126	Humulinic acid A	Organic acids and derivatives	Novel	Novel	Novel		Novel	Novel
124	21011481	21380630	12	21368797	rs2900478	T	A	A	0.102834	2470	0.507426	0.0464888	10.915	4.03e-27	m188	2-methyl-tridecanedioic acid	Lipids and lipid-like molecules	Novel	Novel	Novel		Novel	Novel
124	21011481	21380630	12	21331549	rs4149056	T	C	C	0.112329	2417	0.50052	0.0451542	11.0847	6.92e-28	m196	13(S)-HpOTrE	Lipids and lipid-like molecules	Novel	Novel	Novel		Novel	Novel
124	21011481	21380630	12	21331549	rs4149056	T	C	C	0.112329	2417	0.551878	0.04467	12.3545	4.8e-34	m199	11-HpODE	Lipids and lipid-like molecules	Novel	Novel	Novel		Novel	Novel
124	21011481	21380630	12	21331549	rs4149056	T	C	C	0.112329	2417	0.25599	0.0458226	5.58656	2.58e-08	m284	MG(0:0/14:1(9Z)/0:0)	Lipids and lipid-like molecules	Novel	Novel	Novel		Novel	Novel
124	21011481	21380630	12	21149798	rs60504568	T	C	C	0.0679967	2456	0.312852	0.0573659	5.45362	5.43e-08	m289	23S,25,26-Trihydroxyvitamin D3	Lipids and lipid-like molecules	Novel	Novel	Novel		Novel	Novel
124	21011481	21380630	12	21014094	rs557250003	A	G	G	0.0540155	2453	0.348552	0.0635503	5.48467	4.57e-08	m312	TA-ga	Lipids and lipid-like molecules	Novel	Novel	Novel		Novel	Novel
124	21011481	21380630	12	21014094	rs557250003	A	G	G	0.0540155	2453	0.606089	0.0627324	9.6615	1.07e-21	m316	Chenodeoxycholic acid 3-glucuronide	Lipids and lipid-like molecules	Novel	Novel	Novel		Novel	Novel
124	21011481	21380630	12	21014094	rs557250003	A	G	G	0.0540155	2453	0.490204	0.0631267	7.76539	1.19e-14	m317	Deoxycholic acid 3-glucuronide	Lipids and lipid-like molecules	Reported	Novel		Novel	Reported
124	21011481	21380630	12	21331549	rs4149056	T	C	C	0.112329	2417	1.04295	0.0407913	25.5681	8.25e-128	m318	Glycochenodeoxycholate 3-glucuronide	Lipids and lipid-like molecules	Reported	Novel		Novel	Reported
124	21011481	21380630	12	21331549	rs4149056	T	C	C	0.112329	2417	0.463679	0.0451866	10.2614	3.28e-24	m319	Isomer of glycochenodeoxycholic acid 3-glucuronide	Lipids and lipid-like molecules	Novel	Novel	Novel		Novel	Novel
124	21011481	21380630	12	21331549	rs4149056	T	C	C	0.112329	2417	0.587413	0.0445543	13.1842	2.22e-38	m475	N-Palmitoyl Glutamine	Lipids and lipid-like molecules	Novel	Novel	Novel		Novel	Novel
124	21011481	21380630	12	21331549	rs4149056	T	C	C	0.112329	2417	0.25042	0.0457142	5.47795	4.75e-08	m515	sn1 LysoPE(20:4)	Lipids and lipid-like molecules	Reported	Novel		Novel	Reported
124	21011481	21380630	12	21331549	rs4149056	T	C	C	0.112329	2417	0.283913	0.0457699	6.20304	6.5e-10	m718	Gibberellin A44	Lipids and lipid-like molecules	Novel	Novel	Novel		Novel	Novel
124	21011481	21380630	12	21331549	rs4149056	T	C	C	0.112329	2417	0.566218	0.0446434	12.6831	9.85e-36	m719	7'-Carboxy-gamma-chromanol	Organoheterocyclic compounds	Novel	Novel	Novel		Novel	Novel
124	21011481	21380630	12	21014094	rs557250003	A	G	G	0.0540155	2453	0.608901	0.0626445	9.71994	6.14e-22	m724	Norcholic acid	Lipids and lipid-like molecules	Novel	Novel	Novel		Novel	Novel
124	21011481	21380630	12	21011481	rs145334570	C	A	A	0.0161697	2381	1.07256	0.11208	9.5696	2.58e-21	m727	Cholestane-3,7,12,25-tetrol-3-glucuronide	Lipids and lipid-like molecules	Novel	Novel	Novel		Novel	Novel
124	21011481	21380630	12	21014094	rs557250003	A	G	G	0.0540155	2453	0.563601	0.0628745	8.9639	6.07e-19	m727	Cholestane-3,7,12,25-tetrol-3-glucuronide	Lipids and lipid-like molecules	Novel	Novel	Novel		Novel	Novel
124	21011481	21380630	12	21331549	rs4149056	T	C	C	0.112329	2417	0.610201	0.0443928	13.7455	1.89e-41	m727	Cholestane-3,7,12,25-tetrol-3-glucuronide	Lipids and lipid-like molecules	Novel	Novel	Novel		Novel	Novel
124	21011481	21380630	12	21331549	rs4149056	T	C	C	0.112329	2417	0.278778	0.0458461	6.08073	1.39e-09	m755	1,11-Undecanedicarboxylic acid	Lipids and lipid-like molecules	Novel	Novel	Novel		Novel	Novel
124	21011481	21380630	12	21014094	rs557250003	A	G	G	0.0540375	2452	0.449906	0.0632309	7.11528	1.46e-12	m95	Muricholic acid	Lipids and lipid-like molecules	Novel	Novel	Novel		Novel	Novel
125	56863564	56863564	12	56863564	rs10700116	AAC	A	A	0.100081	2458	-0.358464	0.0465945	-7.69326	2.06e-14	m4	L-Glutamine	Organic acids and derivatives	Reported	Novel		Novel	Reported
125	56863564	56863564	12	56863564	rs10700116	AAC	A	A	0.100081	2458	-0.273658	0.0468395	-5.84245	5.82e-09	m416	N-gamma-Glutamylglutamine	Organic acids and derivatives	Reported	Novel		Novel	Reported
126	95491530	95491530	12	95491530	rs11107893	G	A	A	0.160729	2470	0.208194	0.0378222	5.50455	4.08e-08	m350	Dodecanoylcarnitine	Lipids and lipid-like molecules	Novel	Novel		Novel	Novel		Novel
126	95491530	95491530	12	95491530	rs11107893	G	A	A	0.160729	2470	0.21108	0.0378157	5.5818	2.64e-08	m353	3, 5-Tetradecadiencarnitine	Lipids and lipid-like molecules	Novel	Novel		Novel	Novel		Novel
126	95491530	95491530	12	95491530	rs11107893	G	A	A	0.160729	2470	0.210564	0.0378169	5.568	2.86e-08	m354	cis-5-Tetradecenoylcarnitine	Lipids and lipid-like molecules	Novel	Novel	Novel		Novel	Novel
127	112241766	112337924	12	112337924	rs78069066	G	A	A	0.159714	2445	-0.358246	0.0379797	-9.43256	8.99e-21	m134	3,3'-Thiobispropanoic acid	Organic acids and derivatives	Novel	Novel	Novel		Novel	Novel
127	112241766	112337924	12	112241766	rs671	G	A	A	0.157287	2470	-0.218361	0.0384294	-5.68215	1.49e-08	m626	2-Hydroxy-3-methylbutyric acid	Lipids and lipid-like molecules	Novel	Novel		Novel	Novel		Novel
128	114925305	114925305	12	114925305	rs11067144	C	A	A	0.137117	2352	0.24197	0.0418423	5.78289	8.32e-09	m69	4-Hydroxybenzaldehyde	Organic oxygen compounds	Novel	Novel	Novel		Novel	Novel
129	121173973	121422449	12	121176083	rs1799958	G	A	A	0.120648	2470	1.14088	0.038062	29.9742	1.3e-168	m131	Monoethyl malonic acid	Organic acids and derivatives	Novel	Novel	Novel		Novel	Novel
129	121173973	121422449	12	121173973	rs397952207	T	TG	TG	0.121941	2452	0.450359	0.0434702	10.3602	1.2e-24	m132	Methylsuccinic acid	Lipids and lipid-like molecules	Reported	Reported			Reported
129	121173973	121422449	12	121422449	rs546442868	T	CTGACTGGCACTCAGCA	CTGACTGGCACTCAGCA	0.391332	2365	0.177647	0.0296334	5.99484	2.35e-09	m301	Androsterone sulfate	Lipids and lipid-like molecules	Novel	Novel		Novel	Novel		Novel
129	121173973	121422449	12	121422449	rs546442868	T	CTGACTGGCACTCAGCA	CTGACTGGCACTCAGCA	0.391332	2365	0.182768	0.0296229	6.16981	8.02e-10	m302	Epiandrosterone Sulfate	Lipids and lipid-like molecules	Novel	Novel		Novel	Novel		Novel
129	121173973	121422449	12	121176083	rs1799958	G	A	A	0.120648	2470	1.08902	0.0386726	28.16	1.56e-151	m326	Butyrylcarnitine	Lipids and lipid-like molecules	Reported	Novel		Novel	Reported
129	121173973	121422449	12	121176083	rs1799958	G	A	A	0.120592	2467	0.717123	0.0420736	17.0445	1.14e-61	m331	Valerylcarnitine	Lipids and lipid-like molecules	Reported	Novel		Novel	Reported
129	121173973	121422449	12	121175524	rs2014355	T	C	C	0.120543	2468	0.716602	0.0420907	17.0252	1.53e-61	m731	N-Butyrylglycine	Organic acids and derivatives	Reported	Novel		Novel	Reported
130	122296155	122307472	12	122296155	rs2620332	C	T	T	0.138493	2455	0.248063	0.0408651	6.07029	1.48e-09	m145	4-Hydroxyphenylpyruvic acid*	Benzenoids	Reported	Novel		Novel	Reported
130	122296155	122307472	12	122307472	rs57060343	CTT	C	C	0.140433	2446	-0.550515	0.0394577	-13.952	1.26e-42	m162	2-Hydroxy-2-methylbutyric acid	Lipids and lipid-like molecules	Novel	Novel	Novel		Novel	Novel
130	122296155	122307472	12	122307472	rs57060343	CTT	C	C	0.140433	2446	-0.232879	0.0407053	-5.72109	1.19e-08	m163	3-Hydroxyisovaleric acid	Lipids and lipid-like molecules	Reported	Novel		Novel	Reported
130	122296155	122307472	12	122307472	rs57060343	CTT	C	C	0.140196	2443	-0.5376	0.0394537	-13.6261	8.38e-41	m213	(S)-3-Hydroxyisobutyric acid	Organic acids and derivatives	Novel	Novel	Novel		Novel	Novel
131	125312425	125315647	12	125315647	rs7485656	G	A	A	0.383141	2426	-0.167718	0.0287983	-5.8239	6.51e-09	m456	3'-carboxy-alpha-chromanol	Organoheterocyclic compounds	Novel	Novel	Novel		Novel	Novel
131	125312425	125315647	12	125315647	rs7485656	G	A	A	0.383141	2426	-0.171128	0.0288159	-5.93867	3.29e-09	m550	gamma-CEHC	Organoheterocyclic compounds	Reported	Novel		Novel	Reported
131	125312425	125315647	12	125312425	rs10846744	C	G	G	0.388259	2470	-0.163188	0.028461	-5.73374	1.1e-08	m763	alpha-CEHC glucuronide	Organic oxygen compounds	Novel	Novel		Novel	Novel		Novel
132	48528283	48528283	13	48528283	rs117412559	C	T	T	0.0718623	2470	0.318554	0.0546831	5.82545	6.44e-09	m822	Succinylcarnitine	Lipids and lipid-like molecules	Reported	Novel		Novel	Reported
133	51478716	51478716	13	51478716	rs9316511	C	T	T	0.111885	2440	0.24328	0.0443734	5.48256	4.62e-08	m363	Oleoylcarnitine	Lipids and lipid-like molecules	Novel	Novel		Novel	Novel		Novel
134	95921534	95921534	13	95921534	rs3047283	TACA	T	T	0.296952	2428	0.214554	0.0306856	6.99203	3.49e-12	m280	Acetylcarnosine	Organic acids and derivatives	Reported	Novel		Novel	Reported
135	99839148	99839148	13	99839148	rs2096382	G	A	A	0.4114	2421	-0.166928	0.0290455	-5.74711	1.02e-08	m841	Irbesartan	Benzenoids	Novel	Novel	Novel		Novel	Novel
136	100518634	100518634	13	100518634	rs41281112	C	T	T	0.0346154	2470	-0.961532	0.0758683	-12.6737	1.05e-35	m133	2-Hydroxyglutarate	Organic acids and derivatives	Novel	Novel		Novel	Novel		Novel
137	102125893	102125893	13	102125893	rs77711938	G	A	A	0.0166126	2468	-0.639753	0.111627	-5.73115	1.12e-08	m547	L-Kynurenine	Organic oxygen compounds	Novel	Novel		Novel	Novel		Novel
138	20955010	20955010	14	20955010	rs1760930	A	G	G	0.265385	2470	0.204292	0.0314683	6.492	1.02e-10	m524	1-Methylguanosine	Nucleosides	Novel	Novel		Novel	Novel		Novel
139	53577792	53577792	14	53577792	rs75781782	T	C	C	0.0481781	2470	-0.372509	0.066243	-5.62336	2.08e-08	m3	L-Asparagine	Organic acids and derivatives	Novel	Novel		Novel	Novel		Novel
140	55350666	55350666	14	55350666	rs8004445	G	T	T	0.378395	2467	-0.187035	0.0287559	-6.50421	9.42e-11	m29	3-Methoxytyrosine	Organic acids and derivatives	Reported	Novel		Novel	Reported
141	60605716	60605716	14	60605716	rs34696366	TAAAAC	T	T	0.284211	2470	0.414609	0.0304093	13.6343	7.28e-41	m103	Lithocholyltaurine	Lipids and lipid-like molecules	Novel	Novel	Novel		Novel	Novel
142	63823798	64235556	14	64235556	rs7157785	G	T	T	0.0686235	2470	0.305366	0.0558831	5.46436	5.11e-08	m283	C16 Sphingosine-1-phosphate	Organic acids and derivatives	Novel	Novel	Novel		Novel	Novel
142	63823798	64235556	14	63823798	rs2103947	A	G	G	0.323279	2470	-0.169339	0.0307289	-5.51073	3.94e-08	m80	Epinephrine	Benzenoids	Novel	Novel	Novel		Novel	Novel
143	66446344	66446344	14	66446344	rs1273780	G	A	A	0.259083	2422	-0.177473	0.0321709	-5.51659	3.82e-08	m135	cis-Aconitic acid	Organic acids and derivatives	Novel	Novel	Novel		Novel	Novel
143	66446344	66446344	14	66446344	rs1273780	G	A	A	0.259083	2422	-0.189542	0.0320499	-5.91396	3.81e-09	m137	Isocitric acid	Organic acids and derivatives	Novel	Novel		Novel	Novel		Novel
144	70245193	70245193	14	70245193	rs2296651	G	A	A	0.0295547	2470	0.98792	0.0823511	11.9964	2.88e-32	m100	Chenodeoxycholylglycine	Lipids and lipid-like molecules	Reported	Reported			Reported
144	70245193	70245193	14	70245193	rs2296651	G	A	A	0.0295547	2470	0.917233	0.0826817	11.0935	6.1e-28	m101	Glycohyocholic acid	Lipids and lipid-like molecules	Novel	Novel		Novel	Novel		Novel
144	70245193	70245193	14	70245193	rs2296651	G	A	A	0.0295547	2470	1.13931	0.0815549	13.9699	9.67e-43	m102	Glycocholic acid	Lipids and lipid-like molecules	Reported	Reported			Novel		Novel
144	70245193	70245193	14	70245193	rs2296651	G	A	A	0.0295547	2470	0.533296	0.0840352	6.3461	2.62e-10	m104	Tauroursodeoxycholic acid	Lipids and lipid-like molecules	Novel	Novel	Novel		Novel	Novel
144	70245193	70245193	14	70245193	rs2296651	G	A	A	0.0295547	2470	0.779996	0.0832505	9.36927	1.59e-20	m105	Taurochenodesoxycholic acid	Lipids and lipid-like molecules	Novel	Novel		Novel	Novel		Novel
144	70245193	70245193	14	70245193	rs2296651	G	A	A	0.0295547	2470	0.875123	0.0828664	10.5606	1.58e-25	m107	Taurocholic acid	Lipids and lipid-like molecules	Novel	Novel	Novel		Novel	Novel
144	70245193	70245193	14	70245193	rs2296651	G	A	A	0.0295547	2470	0.75002	0.083362	8.99714	4.51e-19	m563	Foropafant	Lipids and lipid-like molecules	Novel	Novel	Novel		Novel	Novel
144	70245193	70245193	14	70245193	rs2296651	G	A	A	0.0295547	2470	0.790897	0.0832088	9.50497	4.57e-21	m591	14alpha-Hydroxyixocarpanolide	Lipids and lipid-like molecules	Novel	Novel	Novel		Novel	Novel
144	70245193	70245193	14	70245193	rs2296651	G	A	A	0.0295547	2470	0.738118	0.083405	8.8498	1.64e-18	m624	Taurohyocholic acid	Lipids and lipid-like molecules	Novel	Novel	Novel		Novel	Novel
144	70245193	70245193	14	70245193	rs2296651	G	A	A	0.0295547	2470	0.495286	0.0841294	5.88719	4.46e-09	m87	7-Ketodeoxycholic acid	Lipids and lipid-like molecules	Novel	Novel	Novel		Novel	Novel
144	70245193	70245193	14	70245193	rs2296651	G	A	A	0.0295547	2470	0.511738	0.0840895	6.08564	1.34e-09	m89	Chenodeoxycholic acid	Lipids and lipid-like molecules	Novel	Novel		Novel	Novel		Novel
144	70245193	70245193	14	70245193	rs2296651	G	A	A	0.0295547	2470	0.588092	0.0838869	7.01053	3.05e-12	m96	Cholic acid	Lipids and lipid-like molecules	Novel	Novel		Novel	Novel		Novel
144	70245193	70245193	14	70245193	rs2296651	G	A	A	0.0295547	2470	0.513767	0.0840845	6.11013	1.15e-09	m99	Glycoursodeoxycholic acid	Lipids and lipid-like molecules	Novel	Novel	Novel		Novel	Novel
145	73989859	73994728	14	73989859	rs1074501	T	C	C	0.104858	2470	0.828202	0.042225	19.614	1.01e-79	m177	Decadienedioic acid	Lipids and lipid-like molecules	Novel	Novel	Novel		Novel	Novel
145	73989859	73994728	14	73993018	rs35417585	A	G	G	0.0716599	2470	0.886264	0.0521504	16.9944	2.43e-61	m177	Decadienedioic acid	Lipids and lipid-like molecules	Novel	Novel	Novel		Novel	Novel
145	73989859	73994728	14	73992657	rs59834256	T	TAA	TAA	0.104073	2455	-0.362221	0.0450262	-8.04468	1.33e-15	m60	Nocardicin C	Organic acids and derivatives	Novel	Novel	Novel		Novel	Novel
145	73989859	73994728	14	73994728	rs36059280	C	A	A	0.0677275	2451	-0.361536	0.056222	-6.4305	1.52e-10	m60	Nocardicin C	Organic acids and derivatives	Novel	Novel	Novel		Novel	Novel
145	73989859	73994728	14	73989859	rs1074501	T	C	C	0.104858	2470	0.373278	0.0447707	8.33754	1.24e-16	m66	Benzenebutanoic acid	Benzenoids	Novel	Novel	Novel		Novel	Novel
145	73989859	73994728	14	73993018	rs35417585	A	G	G	0.0716599	2470	0.352522	0.0546586	6.44953	1.35e-10	m66	Benzenebutanoic acid	Benzenoids	Novel	Novel	Novel		Novel	Novel
145	73989859	73994728	14	73989859	rs1074501	T	C	C	0.104858	2470	-0.363013	0.0448049	-8.10207	8.41e-16	m716	Millefin	Lipids and lipid-like molecules	Novel	Novel	Novel		Novel	Novel
145	73989859	73994728	14	73994728	rs36059280	C	A	A	0.0677275	2451	-0.322762	0.0563421	-5.72862	1.14e-08	m716	Millefin	Lipids and lipid-like molecules	Novel	Novel	Novel		Novel	Novel
146	89597156	89597156	14	89597156	rs4904514	A	G	G	0.314652	2382	-0.177821	0.0314307	-5.65756	1.72e-08	m521	1-Methylinosine	Nucleosides	Novel	Novel	Novel		Novel	Novel
147	94780768	94780768	14	94780768	rs146744332	G	A	A	0.0137931	2465	-0.826875	0.121876	-6.78457	1.45e-11	m551	Cortisol	Lipids and lipid-like molecules	Reported	Novel		Novel	Reported
147	94780768	94780768	14	94780768	rs146744332	G	A	A	0.0137931	2465	-0.872841	0.121688	-7.17278	9.68e-13	m58	Arg Ser Phe	Organic acids and derivatives	Novel	Novel	Novel		Novel	Novel
148	100796029	100796029	14	100796029	rs3742381	C	T	T	0.0357143	2450	0.417547	0.0762608	5.47525	4.81e-08	m805	Homoarginine	Organic acids and derivatives	Reported	Novel		Novel	Reported
149	104567926	104575290	14	104567926	rs1771014	A	G	G	0.112469	2414	0.467893	0.0444726	10.5209	2.43e-25	m293	Dihydrouracil	Organoheterocyclic compounds	Novel	Novel	Novel		Novel	Novel
149	104567926	104575290	14	104575290	rs12587641	C	G	G	0.125213	2348	0.655021	0.041645	15.7287	4.49e-53	m3	L-Asparagine	Organic acids and derivatives	Reported	Novel		Novel	Reported
150	40693450	40693450	15	40693450	rs12594728	T	C	C	0.215694	2434	0.312768	0.034025	9.1923	8.01e-20	m330	Isovalerylcarnitine	Lipids and lipid-like molecules	Reported	Novel		Novel	Reported
151	45693164	45693164	15	45693164	rs35335867	CT	C	C	0.164114	2416	-0.269275	0.0382549	-7.03897	2.51e-12	m805	Homoarginine	Organic acids and derivatives	Reported	Novel		Novel	Reported
152	63423739	63423739	15	63423739	rs1472631	A	G	G	0.181579	2470	-0.325684	0.0368175	-8.84589	1.69e-18	m822	Succinylcarnitine	Lipids and lipid-like molecules	Reported	Novel		Novel	Reported
153	75012985	75012985	15	75012985	rs1048943	T	G	G	0.231065	2469	-0.207844	0.0330798	-6.28313	3.91e-10	m457	Coclaurine	Organoheterocyclic compounds	Novel	Novel	Novel		Novel	Novel
153	75012985	75012985	15	75012985	rs1048943	T	G	G	0.230972	2470	-0.199653	0.0330963	-6.03249	1.86e-09	m458	Erysodine	Alkaloids	Novel	Novel	Novel		Novel	Novel
153	75012985	75012985	15	75012985	rs1048943	T	G	G	0.230972	2470	-0.203778	0.0330861	-6.15901	8.52e-10	m459	Norcodeine	Alkaloids	Novel	Novel	Novel		Novel	Novel
154	76574232	76574232	15	76574232	rs12898415	C	T	T	0.371972	2394	-0.174495	0.0293642	-5.94245	3.22e-09	m663	N-Acetyl-DL-leucine	Organic acids and derivatives	Novel	Novel	Novel		Novel	Novel
155	85428604	85478696	15	85428604	rs73437980	C	G	G	0.204387	2439	-0.246689	0.035151	-7.01798	2.91e-12	m116	5,6-Dihydrouridine	Organic oxygen compounds	Reported	Novel		Novel	Reported
155	85428604	85478696	15	85478696	rs2242047	C	T	T	0.325304	2470	-0.396916	0.0294028	-13.4993	4.04e-40	m116	5,6-Dihydrouridine	Organic oxygen compounds	Reported	Novel		Novel	Reported
155	85428604	85478696	15	85478696	rs2242047	C	T	T	0.325304	2470	-0.248616	0.0300551	-8.27198	2.13e-16	m254	Pseudouridine	Nucleosides	Reported	Novel		Novel	Reported
155	85428604	85478696	15	85478696	rs2242047	C	T	T	0.325304	2470	-0.21001	0.0301743	-6.9599	4.35e-12	m649	Imidazol-5-yl-pyruvate	Organoheterocyclic compounds	Novel	Novel	Novel		Novel	Novel
155	85428604	85478696	15	85428604	rs73437980	C	G	G	0.204387	2439	-0.35508	0.0347223	-10.2263	4.6e-24	m751	N4-Acetylcytidine	Nucleosides	Reported	Novel		Novel	Reported
155	85428604	85478696	15	85478696	rs2242047	C	T	T	0.325304	2470	-0.510042	0.0286871	-17.7795	1.22e-66	m751	N4-Acetylcytidine	Nucleosides	Reported	Novel		Novel	Reported
156	6948766	6948766	16	6948766	rs7188908	A	G	G	0.210324	2470	0.196409	0.0344486	5.7015	1.33e-08	m609	Testosterone	Lipids and lipid-like molecules	Novel	Novel		Novel	Novel		Novel
157	15132108	15139594	16	15139594	rs34955778	T	C	C	0.388267	2412	-0.174297	0.0294541	-5.91758	3.73e-09	m506	sn2 LysoPC(20:3)	Lipids and lipid-like molecules	Novel	Novel	Novel		Novel	Novel
157	15132108	15139594	16	15132108	rs2740	A	G	G	0.377126	2470	-0.189784	0.0292204	-6.49491	1e-10	m507	sn1 LysoPC(20:3)	Lipids and lipid-like molecules	Reported	Novel		Novel	Reported
158	20468948	20571043	16	20477004	rs59261767	C	T	T	0.186842	2470	0.450509	0.0353237	12.7537	4e-36	m139	Hydrocinnamic acid	Phenylpropanoids and polyketides	Reported	Reported			Reported
158	20468948	20571043	16	20489654	rs1018893	G	A	A	0.183528	2392	0.219293	0.0369822	5.92968	3.47e-09	m140	D-Phenyllactic acid	Phenylpropanoids and polyketides	Novel	Novel		Novel	Novel		Novel
158	20468948	20571043	16	20480527	rs60168114	AT	A	A	0.186458	2459	0.338335	0.0359263	9.41745	1.03e-20	m147	3,4-Dimethoxycinnamic acid	Phenylpropanoids and polyketides	Novel	Novel	Novel		Novel	Novel
158	20468948	20571043	16	20563727	rs8045977	G	A	A	0.142584	2353	0.406207	0.0410717	9.89019	1.26e-22	m163	3-Hydroxyisovaleric acid	Lipids and lipid-like molecules	Reported	Novel		Novel	Reported
158	20468948	20571043	16	20489654	rs1018893	G	A	A	0.183528	2392	0.424371	0.0362612	11.7032	8.36e-31	m168	2-Ethyl-2-Hydroxybutyric acid	Lipids and lipid-like molecules	Novel	Novel	Novel		Novel	Novel
158	20468948	20571043	16	20480346	rs60875052	G	C	C	0.174385	2397	0.242964	0.0376784	6.44836	1.36e-10	m172	Pantoic acid	Lipids and lipid-like molecules	Novel	Novel	Novel		Novel	Novel
158	20468948	20571043	16	20477004	rs59261767	C	T	T	0.186842	2470	0.692571	0.0336994	20.5514	9.15e-87	m222	3-Indolepropionic acid	Organoheterocyclic compounds	Reported	Reported			Reported
158	20468948	20571043	16	20489654	rs1018893	G	A	A	0.183528	2392	0.457405	0.0361158	12.665	1.26e-35	m227	Oxalacetate*	Organic acids and derivatives	Novel	Novel		Novel	Novel		Novel
158	20468948	20571043	16	20477004	rs59261767	C	T	T	0.186842	2470	0.684348	0.0337674	20.2665	1.34e-84	m482	Indole-3-methyl acetate	Organoheterocyclic compounds	Novel	Novel	Novel		Novel	Novel
158	20468948	20571043	16	20468948	rs140856972	T	C	C	0.186306	2461	-0.248626	0.036213	-6.86564	8.35e-12	m621	4-Hydroxyhippic acid	Benzenoids	Novel	Novel	Novel		Novel	Novel
158	20468948	20571043	16	20477004	rs59261767	C	T	T	0.186842	2470	0.302023	0.0359589	8.39912	7.48e-17	m67	Homoveratric acid	Benzenoids	Novel	Novel	Novel		Novel	Novel
158	20468948	20571043	16	20480527	rs60168114	AT	A	A	0.186458	2459	0.643875	0.0341868	18.834	5.08e-74	m673	(2E,6E,8E)-deca-2,6,8-trienoic acid	Lipids and lipid-like molecules	Novel	Novel	Novel		Novel	Novel
158	20468948	20571043	16	20477004	rs59261767	C	T	T	0.186842	2470	-0.433204	0.0354113	-12.2335	1.88e-33	m684	N-Feruloylglycine	Organic acids and derivatives	Novel	Novel	Novel		Novel	Novel
158	20468948	20571043	16	20571043	rs61486304	AT	A	A	0.16139	2432	0.336841	0.0382284	8.81128	2.31e-18	m73	Salicylic acid	Benzenoids	Reported	Novel		Novel	Reported
158	20468948	20571043	16	20489654	rs1018893	G	A	A	0.183528	2392	0.386343	0.0364571	10.5972	1.13e-25	m747	Methyl-4-hydroxybenzoate sulfate	Organic acids and derivatives	Novel	Novel	Novel		Novel	Novel
158	20468948	20571043	16	20477004	rs59261767	C	T	T	0.186842	2470	0.253805	0.0361096	7.02874	2.69e-12	m749	Dihydroferulic acid 4-O-sulfate	Organic acids and derivatives	Novel	Novel	Novel		Novel	Novel
158	20468948	20571043	16	20477004	rs59261767	C	T	T	0.186842	2470	0.219313	0.036201	6.0582	1.59e-09	m750	3-[4-methoxy-3-(sulfooxy)phenyl]propanoic acid	Organic acids and derivatives	Novel	Novel	Novel		Novel	Novel
158	20468948	20571043	16	20468948	rs140856972	T	C	C	0.186306	2461	-0.230074	0.0363011	-6.33793	2.76e-10	m82	3-Hydroxyhippuric acid	Benzenoids	Novel	Novel	Novel		Novel	Novel
159	62174664	62174664	16	62174664	rs192597064	A	T	T	0.0196488	2392	-0.581869	0.102581	-5.67228	1.58e-08	m59	Oxidized glutathione	Organic acids and derivatives	Novel	Novel	Novel		Novel	Novel
160	87878822	87878822	16	87878822	rs8051149	G	A	A	0.182996	2470	0.340895	0.0358907	9.49814	4.86e-21	m547	L-Kynurenine	Organic oxygen compounds	Reported	Novel		Novel	Reported
160	87878822	87878822	16	87878822	rs8051149	G	A	A	0.182996	2470	0.212026	0.0362907	5.84242	5.82e-09	m796	5-Hydroxy-L-tryptophan	Organoheterocyclic compounds	Novel	Novel	Novel		Novel	Novel
161	89147282	89752194	16	89147282	rs6500516	T	C	C	0.299351	2467	0.234213	0.030378	7.70996	1.81e-14	m128	Methylmalonic acid	Organic acids and derivatives	Reported	Novel		Novel	Reported
161	89147282	89752194	16	89217507	rs111243767	C	T	T	0.107085	2470	-0.365963	0.0457561	-7.99812	1.92e-15	m128	Methylmalonic acid	Organic acids and derivatives	Reported	Novel		Novel	Reported
161	89147282	89752194	16	89147282	rs6500516	T	C	C	0.299351	2467	0.240212	0.0303641	7.91105	3.82e-15	m131	Monoethyl malonic acid	Organic acids and derivatives	Novel	Novel	Novel		Novel	Novel
161	89147282	89752194	16	89217507	rs111243767	C	T	T	0.107085	2470	-0.433285	0.0455172	-9.51913	4e-21	m131	Monoethyl malonic acid	Organic acids and derivatives	Novel	Novel	Novel		Novel	Novel
161	89147282	89752194	16	89752194	rs3751700	G	A	A	0.306883	2470	0.323262	0.0301483	10.7224	2.99e-26	m156	Leucyl-phenylalanine	Organic acids and derivatives	Novel	Novel		Novel	Novel		Novel
161	89147282	89752194	16	89712889	rs460879	T	C	C	0.477319	2469	0.19734	0.0281628	7.00714	3.13e-12	m419	Valylleucine	Organic acids and derivatives	Novel	Novel	Novel		Novel	Novel
161	89147282	89752194	16	89712889	rs460879	T	C	C	0.477319	2469	0.231105	0.0280599	8.23612	2.85e-16	m428	Tyrosylhydroxyproline	Organic acids and derivatives	Novel	Novel	Novel		Novel	Novel
161	89147282	89752194	16	89752194	rs3751700	G	A	A	0.306883	2470	0.402906	0.0297571	13.5398	2.42e-40	m433	Tryptophyl-Leucine	Organic acids and derivatives	Novel	Novel	Novel		Novel	Novel
161	89147282	89752194	16	89752194	rs3751700	G	A	A	0.306883	2470	0.194554	0.0305929	6.35945	2.4e-10	m56	Phenylalanylphenylalanine	Organic acids and derivatives	Reported	Novel		Novel	Reported
162	4937982	4985515	17	4985515	rs12941688	A	G	G	0.471667	2400	0.179981	0.0281652	6.39018	1.98e-10	m527	Apronal	Organic acids and derivatives	Novel	Novel	Novel		Novel	Novel
162	4937982	4985515	17	4937982	rs346824	T	C	C	0.213686	2382	0.223557	0.0349728	6.39233	1.96e-10	m580	2-Acetyl-D1-piperideine	Organoheterocyclic compounds	Novel	Novel	Novel		Novel	Novel
163	7123506	7530271	17	7529902	rs13894	G	A	A	0.0208502	2470	-0.985937	0.0986923	-9.99001	4.59e-23	m21	N6-Acetyl-L-lysine	Organic acids and derivatives	Reported	Novel		Novel	Reported
163	7123506	7530271	17	7530271	rs858520	C	T	T	0.25749	2470	-0.259263	0.0322194	-8.04681	1.31e-15	m21	N6-Acetyl-L-lysine	Organic acids and derivatives	Reported	Novel		Novel	Reported
163	7123506	7530271	17	7123506	rs2230178	G	A	A	0.156328	2402	-0.241295	0.039829	-6.05828	1.59e-09	m353	3, 5-Tetradecadiencarnitine	Lipids and lipid-like molecules	Novel	Novel		Novel	Novel		Novel
163	7123506	7530271	17	7123506	rs2230178	G	A	A	0.156328	2402	-0.248942	0.0398386	-6.24878	4.88e-10	m354	cis-5-Tetradecenoylcarnitine	Lipids and lipid-like molecules	Novel	Novel	Novel		Novel	Novel
164	37504339	37504339	17	37504339	rs3079636	C	CTTT	CTTT	0.249895	2377	0.192156	0.0332019	5.78749	8.09e-09	m29	3-Methoxytyrosine	Organic acids and derivatives	Novel	Novel		Novel	Novel		Novel
164	37504339	37504339	17	37504339	rs3079636	C	CTTT	CTTT	0.249895	2377	0.237773	0.0330995	7.18359	9.05e-13	m386	Methionine sulfone	Organic acids and derivatives	Reported	Novel		Novel	Reported
165	48756937	48756937	17	48756937	rs3785912	C	T	T	0.321457	2470	-0.168833	0.0306618	-5.50629	4.04e-08	m318	Glycochenodeoxycholate 3-glucuronide	Lipids and lipid-like molecules	Reported	Novel		Novel	Reported
165	48756937	48756937	17	48756937	rs3785912	C	T	T	0.321457	2470	-0.201877	0.0305807	-6.60144	4.97e-11	m727	Cholestane-3,7,12,25-tetrol-3-glucuronide	Lipids and lipid-like molecules	Novel	Novel	Novel		Novel	Novel
166	73840243	73973857	17	73973432	rs118121093	G	C	C	0.109622	2463	-0.271487	0.0457643	-5.9323	3.41e-09	m108	27-Norcholestanehexol	Lipids and lipid-like molecules	Novel	Novel	Novel		Novel	Novel
166	73840243	73973857	17	73973785	rs73357536	T	C	C	0.114788	2448	0.349581	0.0444956	7.85652	5.86e-15	m334	3-Methylglutarylcarnitine	Lipids and lipid-like molecules	Novel	Novel		Novel	Novel		Novel
166	73840243	73973857	17	73973857	rs74579692	C	T	T	0.111336	2470	-0.33134	0.0450867	-7.34895	2.7e-13	m720	Ethyl 7-epi-12-hydroxyjasmonate glucoside	Lipids and lipid-like molecules	Novel	Novel	Novel		Novel	Novel
166	73840243	73973857	17	73973785	rs73357536	T	C	C	0.114788	2448	0.543015	0.0434486	12.4979	8.65e-35	m725	Varanic acid	Lipids and lipid-like molecules	Novel	Novel	Novel		Novel	Novel
166	73840243	73973857	17	73840243	rs3744010	G	A	A	0.114865	2368	-0.247239	0.0452037	-5.46945	4.99e-08	m831	Suberoyl-L-carnitine	Organic acids and derivatives	Novel	Novel	Novel		Novel	Novel
167	80190567	80191348	17	80191348	rs12601778	T	C	C	0.152493	2387	0.230401	0.0397842	5.79128	7.91e-09	m141	Hydroxyphenyllactic acid	Phenylpropanoids and polyketides	Reported	Novel		Novel	Reported
167	80190567	80191348	17	80190567	rs36034727	T	C	C	0.0746964	2470	0.338289	0.053661	6.30418	3.42e-10	m211	L-Malic acid	Organic acids and derivatives	Reported	Novel		Novel	Reported
168	673086	731545	18	673086	rs2790	A	G	G	0.394651	2449	-0.248525	0.0292076	-8.50894	3.01e-17	m111	Arabinonic acid	Organic oxygen compounds	Reported	Reported			Reported
168	673086	731545	18	731545	rs62091709	T	C	C	0.265638	2462	0.305499	0.0318635	9.58773	2.12e-21	m111	Arabinonic acid	Organic oxygen compounds	Reported	Reported			Reported
169	33779204	33781541	18	33781541	rs118111115	C	T	T	0.0830288	2463	-0.324201	0.0503938	-6.43335	1.49e-10	m103	Lithocholyltaurine	Lipids and lipid-like molecules	Novel	Novel	Novel		Novel	Novel
169	33779204	33781541	18	33779204	rs16967532	T	G	G	0.0932449	2413	0.265525	0.0483767	5.4887	4.47e-08	m576	1-Methylguanine	Organoheterocyclic compounds	Novel	Novel	Novel		Novel	Novel
169	33779204	33781541	18	33779705	rs3744900	G	A	A	0.0842105	2470	-0.291098	0.0500485	-5.81632	6.79e-09	m737	Hydantoin-5-propionic acid	Organoheterocyclic compounds	Reported	Novel		Novel	Reported
170	41293977	41293977	18	41293977	rs184301284	T	C	C	0.0247462	2364	0.528596	0.0931212	5.67643	1.54e-08	m229	Oxoglutaric acid*	Organic acids and derivatives	Novel	Novel		Novel	Novel		Novel
171	57637560	57637560	18	57637560	rs112843209	T	TCA	TCA	0.105209	2419	-0.257965	0.0468579	-5.50527	4.08e-08	m302	Epiandrosterone Sulfate	Lipids and lipid-like molecules	Novel	Novel		Novel	Novel		Novel
172	72165058	72169267	18	72168486	rs8084410	T	C	C	0.312348	2470	0.205072	0.029884	6.86227	8.54e-12	m156	Leucyl-phenylalanine	Organic acids and derivatives	Novel	Novel		Novel	Novel		Novel
172	72165058	72169267	18	72165058	rs8083001	T	C	C	0.309436	2448	0.449889	0.0291323	15.443	2.07e-51	m419	Valylleucine	Organic acids and derivatives	Novel	Novel	Novel		Novel	Novel
172	72165058	72169267	18	72169267	rs7241558	A	T	T	0.310183	2455	0.194635	0.0301531	6.4549	1.3e-10	m428	Tyrosylhydroxyproline	Organic acids and derivatives	Novel	Novel	Novel		Novel	Novel
173	76060460	76060460	18	76060460	rs57878759	G	A	A	0.0538462	2470	0.391516	0.0628441	6.22995	5.47e-10	m362	Linoelaidyl carnitine	Lipids and lipid-like molecules	Novel	Novel	Novel		Novel	Novel
173	76060460	76060460	18	76060460	rs57878759	G	A	A	0.0538462	2470	0.356623	0.0629282	5.66715	1.62e-08	m363	Oleoylcarnitine	Lipids and lipid-like molecules	Novel	Novel		Novel	Novel		Novel
174	12505873	12505873	19	12505873	rs7246440	A	G	G	0.298177	2413	-0.168213	0.0308386	-5.45462	5.41e-08	m63	Pro Tyr Tyr Val	Organic acids and derivatives	Novel	Novel	Novel		Novel	Novel
175	13010520	13010520	19	13010520	rs8012	G	A	A	0.207085	2470	0.390687	0.0340886	11.4609	1.15e-29	m687	Glutarylcarnitine	Lipids and lipid-like molecules	Reported	Novel		Novel	Reported
176	15990431	16013843	19	16013843	rs6512068	C	T	T	0.486964	2378	0.215607	0.0290539	7.42093	1.61e-13	m199	11-HpODE	Lipids and lipid-like molecules	Novel	Novel	Novel		Novel	Novel
176	15990431	16013843	19	15990431	rs2108622	C	T	T	0.256057	2394	0.396321	0.0323644	12.2456	1.75e-33	m312	TA-ga	Lipids and lipid-like molecules	Novel	Novel	Novel		Novel	Novel
176	15990431	16013843	19	15991914	rs3093193	C	G	G	0.259244	2407	-0.271488	0.0326121	-8.32477	1.4e-16	m456	3'-carboxy-alpha-chromanol	Organoheterocyclic compounds	Novel	Novel	Novel		Novel	Novel
176	15990431	16013843	19	15991914	rs3093193	C	G	G	0.259244	2407	-0.268232	0.0326452	-8.21659	3.38e-16	m550	gamma-CEHC	Organoheterocyclic compounds	Reported	Novel		Novel	Reported
176	15990431	16013843	19	15990431	rs2108622	C	T	T	0.256057	2394	0.393267	0.0323349	12.1623	4.57e-33	m559	Corticosterone	Lipids and lipid-like molecules	Novel	Novel	Novel		Novel	Novel
176	15990431	16013843	19	15991914	rs3093193	C	G	G	0.259244	2407	-0.36234	0.0320841	-11.2934	7.43e-29	m763	alpha-CEHC glucuronide	Organic oxygen compounds	Reported	Novel		Novel	Reported
177	33364628	33364628	19	33364628	rs8101881	C	T	T	0.279555	2470	0.240502	0.0313369	7.67473	2.37e-14	m781	Homocitrulline	Organic acids and derivatives	Reported	Novel		Novel	Reported
178	34306922	34306922	19	34306922	rs190456194	T	A	A	0.0107233	2378	-0.801668	0.140075	-5.72315	1.18e-08	m585	1-(2-Furfuryl)-pyrrole	Organoheterocyclic compounds	Novel	Novel	Novel		Novel	Novel
179	36267004	36267004	19	36267004	rs3810452	C	T	T	0.453999	2413	0.158363	0.0287137	5.51524	3.85e-08	m115	Glucosamine 6-sulfate	Organic oxygen compounds	Novel	Novel	Novel		Novel	Novel
179	36267004	36267004	19	36267004	rs3810452	C	T	T	0.453999	2413	0.179844	0.0286931	6.26783	4.32e-10	m392	Pipecolic acid	Organic acids and derivatives	Novel	Novel		Novel	Novel		Novel
180	49206631	49206631	19	49206631	rs1047781	A	T	T	0.462551	2470	-0.158662	0.028729	-5.52271	3.69e-08	m807	O-Desmethyl-lacosamide	Organic acids and derivatives	Novel	Novel	Novel		Novel	Novel
181	744570	752963	20	744570	rs6054605	G	A	A	0.328195	2465	-0.19727	0.0293985	-6.71019	2.4e-11	m169	2-Methyl-3-hydroxyvaleric acid	Lipids and lipid-like molecules	Novel	Novel	Novel		Novel	Novel
181	744570	752963	20	752963	rs6140149	A	G	G	0.322587	2373	-0.18273	0.0302088	-6.04888	1.69e-09	m527	Apronal	Organic acids and derivatives	Novel	Novel	Novel		Novel	Novel
181	744570	752963	20	752963	rs6140149	A	G	G	0.322587	2373	-0.16886	0.0302182	-5.58802	2.56e-08	m580	2-Acetyl-D1-piperideine	Organoheterocyclic compounds	Novel	Novel	Novel		Novel	Novel
181	744570	752963	20	747968	rs73602146	G	A	A	0.324497	2433	-0.200399	0.0297206	-6.74278	1.93e-11	m626	2-Hydroxy-3-methylbutyric acid	Lipids and lipid-like molecules	Novel	Novel		Novel	Novel		Novel
181	744570	752963	20	752963	rs6140149	A	G	G	0.322587	2373	-0.182528	0.0301901	-6.04597	1.72e-09	m794	N1,N8-Diacetylspermidine	Organic acids and derivatives	Novel	Novel	Novel		Novel	Novel
182	12958687	12962718	20	12962718	rs364585	G	A	A	0.420648	2470	0.240808	0.0285625	8.43092	5.75e-17	m283	C16 Sphingosine-1-phosphate	Organic acids and derivatives	Novel	Novel	Novel		Novel	Novel
182	12958687	12962718	20	12958687	rs438568	G	A	A	0.419951	2436	0.166222	0.0290108	5.72965	1.13e-08	m615	C17 Sphingosine-1-phosphate	Lipids and lipid-like molecules	Novel	Novel	Novel		Novel	Novel
183	23132539	23132539	20	23132539	rs844908	G	A	A	0.0295436	2454	0.470472	0.0849987	5.53505	3.44e-08	m725	Varanic acid	Lipids and lipid-like molecules	Novel	Novel	Novel		Novel	Novel
184	33632775	33632775	20	33632775	rs3803936	C	T	T	0.388662	2452	-0.174291	0.0293771	-5.9329	3.4e-09	m365	Arachidonoylcarnitine	Lipids and lipid-like molecules	Novel	Novel		Novel	Novel		Novel
185	45241246	45241246	20	45241246	rs3092298	CAA	C	C	0.418851	2403	-0.168356	0.029088	-5.78783	8.06e-09	m772	O-Adipoylcarnitine	Lipids and lipid-like molecules	Novel	Novel		Novel	Novel		Novel
186	62142524	62142524	20	62142524	rs1757774	T	C	C	0.236015	2449	-0.26889	0.0323517	-8.31146	1.55e-16	m783	Guanidoacetic acid	Organic acids and derivatives	Reported	Novel		Novel	Reported
187	43395873	43395873	21	43395873	rs74712652	T	C	C	0.0151822	2470	0.660113	0.116525	5.66497	1.64e-08	m610	Androstenedione	Lipids and lipid-like molecules	Novel	Novel		Novel	Novel		Novel
188	18910355	18915282	22	18915282	rs5747934	C	T	T	0.144305	2467	0.769458	0.0374022	20.5725	6.42e-87	m389	L-Proline	Organic acids and derivatives	Reported	Novel		Novel	Reported
188	18910355	18915282	22	18915282	rs5747934	C	T	T	0.144305	2467	0.709896	0.037875	18.7431	2.19e-73	m531	1-Pyrroline	Organoheterocyclic compounds	Novel	Novel	Novel		Novel	Novel
188	18910355	18915282	22	18910355	rs5747933	G	T	T	0.139841	2392	0.232506	0.0416387	5.58389	2.62e-08	m795	Dopamine	Benzenoids	Novel	Novel	Novel		Novel	Novel
189	19950263	19951271	22	19950263	rs6267	G	T	T	0.0611336	2470	-0.612972	0.0590266	-10.3847	9.35e-25	m275	3-Dehydroquinate	Organic acids and derivatives	Novel	Novel	Novel		Novel	Novel
189	19950263	19951271	22	19951271	rs4680	G	A	A	0.275021	2398	-0.599925	0.0294724	-20.3555	4.34e-85	m275	3-Dehydroquinate	Organic acids and derivatives	Novel	Novel	Novel		Novel	Novel
189	19950263	19951271	22	19951271	rs4680	G	A	A	0.275136	2397	-0.185769	0.0318596	-5.83086	6.26e-09	m288	Dihydroisomorphine-6-glucuronide	Alkaloids	Novel	Novel	Novel		Novel	Novel
189	19950263	19951271	22	19950263	rs6267	G	T	T	0.0611336	2470	-0.33973	0.0599134	-5.67035	1.59e-08	m29	3-Methoxytyrosine	Organic acids and derivatives	Reported	Novel		Novel	Reported
189	19950263	19951271	22	19951271	rs4680	G	A	A	0.275021	2398	-0.21774	0.0316386	-6.8821	7.5e-12	m734	5-Methylthioribulose 1-phosphate	Organic oxygen compounds	Novel	Novel	Novel		Novel	Novel
190	24267047	24312204	22	24312204	rs4822466	G	A	A	0.470445	2470	0.346444	0.0276351	12.5364	5.37e-35	m117	N-Acetylmuramate	Organic oxygen compounds	Novel	Novel	Novel		Novel	Novel
190	24267047	24312204	22	24267047	rs5751777	C	T	T	0.49086	2407	0.351124	0.0278314	12.6161	2.21e-35	m682	Indolepyruvate*	Organoheterocyclic compounds	Novel	Novel	Novel		Novel	Novel
191	24992266	24992266	22	24992266	rs5751901	T	C	C	0.35668	2470	-0.232527	0.0295018	-7.88179	4.8e-15	m49	Cysteineglutathione disulfide	Organic acids and derivatives	Reported	Novel		Novel	Reported
191	24992266	24992266	22	24992266	rs5751901	T	C	C	0.35668	2470	-0.225752	0.0295231	-7.64662	2.94e-14	m59	Oxidized glutathione	Organic acids and derivatives	Novel	Novel	Novel		Novel	Novel
192	40757228	40858693	22	40757228	rs8135371	A	C	C	0.0943242	2449	-0.36519	0.0486554	-7.50563	8.51e-14	m291	Succinyladenosine	Nucleosides	Reported	Novel		Novel	Reported
192	40757228	40858693	22	40858693	rs57948569	G	A	A	0.0370445	2470	0.566533	0.0746421	7.58999	4.51e-14	m291	Succinyladenosine	Nucleosides	Reported	Novel		Novel	Reported
193	42516366	42516366	22	42516366	rs5751221	C	T	T	0.488917	2391	-0.154624	0.0279781	-5.52661	3.62e-08	m475	N-Palmitoyl Glutamine	Lipids and lipid-like molecules	Novel	Novel	Novel		Novel	Novel
194	50679678	50961169	22	50957462	rs131816	T	C	C	0.0351129	2435	0.735923	0.0768211	9.57971	2.31e-21	m258	Ribothymidine	Nucleosides	Reported	Novel		Novel	Reported
194	50679678	50961169	22	50957462	rs131816	T	C	C	0.0351129	2435	0.642555	0.0771629	8.32725	1.36e-16	m38	N-Acetylaspartylglutamic acid	Organic acids and derivatives	Novel	Novel		Novel	Novel		Novel
194	50679678	50961169	22	50961169	rs131813	G	A	A	0.0351055	2464	0.517392	0.0771563	6.70576	2.48e-11	m575	Thymine	Organoheterocyclic compounds	Novel	Novel	Novel		Novel	Novel
[truncated: 1 more rows]

[truncated: 25 more sheets: Table S10, Table S11, Table S12, Table S13, Table S14, Table S15, Table S16, Table S17, Table S18, Table S19, Table S20, Table S21, Table S22, Table S23, Table S24, Table S25, Table S26, Table S27, Table S28, Table S29 …]
