# Supplementary material for: A Map of Multi-omics Quantitative Trait Loci in a Chinese Population Reveals Regulatory Variations and Disease Links
Source: Research Square preprint supplement (doi:10.21203/rs.3.rs-8193543/v1), 2026-01-06
Supplement: Supplementary file 3 [file b3910e068a018d0320a0fe8a.docx]

**Genetic Structure of Immune Plasma Proteome**

Among all 18,577 variants, the main variant types comprised 33.3% intronic, 23.4% intergenic, 15.3% upstream, 13.1% downstream, 8.9% noncoding transcript exon, and 1.3% regulatory region variants (**Figure S3d**). We defined pQTLs located within 1 Mb to the transcript starting site (TSS) of the corresponding genes as *cis*-acting variants (*cis*-pQTLs) and pQTLs further than 1 Mb to the TSS as *trans*-acting variants (*trans*-pQTLs). Most of the *cis-*pQTLs were located within 400 Kb of the corresponding TSS for each protein (**Figure S3a**).

**Determination of Protein Ratios**

In addition to single-protein QTLs, we analyzed ratio-based associations between protein pairs (prQTLs), considering 66,430 possible pairs for 365 proteins. Not all pairs were eligible for the prQTL analysis, and we applied Gaussian graphical models (GGMs)1, which selected 28 pairs (*P* < 7.5 × 10-7, Bonferroni corrected), with seven (25%) validated as high confidence (> 0.95) via the STRING database (**Table S6**). We then performed association tests on these 28 ratios, adjusting for age, sex, and the first genetic principal component (PC). This analysis identified 13 significant prQTLs (*P* < 5 × 10-8/28, p-gain > 28 × 107) involving seven ratios (**Table S7**). Colocalization analysis showed that eight prQTLs shared a genetic signal with one protein (posterior probability, or PP > 0.85), four with both (PP > 0.85), and one with neither.

**Genetic Structure of Plasma Metabolites**

We conducted association analyses of these metabolites with 4,903,063 SNPs and identified 45,001 associations for 369 metabolites at *P* < 5 × 10−8 (**Figure. 1b, Figure. 3a**).

Comparison of the 360 unique SNPs from these 587 metabQTLs between the CAS cohort and Europeans (1000 Genomes Project, phase 32) revealed 30 SNPs (each linked to one metabolite) with >10-fold higher MAF in the CAS cohort, suggesting population-specific SNPs.

Heritability correlated positively with the number of associated SNPs across all 841 metabolites (Pearson’s r = 0.3, *P* = 1.7 × 10-18). This pattern remained significant within the lipid and lipid-like molecule, organic acid and derivative, and organic oxygen compound superclasses (*P* < 0.05), but not in the other seven superclasses (**Figure S6**).

**Determination of Metabolite Ratios**

Investigating variants associated with metabolite ratios was performed to uncover additional genetic determinants not captured by individual metabolite levels. A total of 256 metabolite ratios3 were biologically formed based on the Human Metabolome Database (HMDB)4, linking metabolites involved in shared enzymes or transporters (**Table S13**). These ratios were predominantly within-superclass (59.4%), though benzenoids and nucleosides formed high cross-superclass events (95% and 86.3%, respectively), illustrating the complex biochemical network of metabolites in the human body (**Figure S7a**).

By conducting association analyses on the 256 metabolite ratios, we identified 129 independent mrQTLs for 101 metabolite ratios across 58 loci (*P* < 5.0 × 10−8) (**Table S14**). Similar to metabolite loci, the loci of ratios also exhibit significant pleiotropy, with 19 loci associated with more than one ratio (range: 2–12; **Figure S7b**). Comparing our results with four previous studies3,5–7 (**Table S15**), we found that 73 of the 101 metabolite ratios had not been previously reported, and we identified 90 mrQTLs for these 73 ratios. Among the 28 ratios previously reported with significant mrQTLs, we identified 39 mrQTLs (with 32 SNPs). Of these, we replicated 27 mrQTLs for 22 ratios (21 SNPs), and identified 12 novel QTLs for 12 metabolite ratios (11 SNPs). In total, 102 novel mrQTLs were identified in this study. Among all identified mrQTLs, 31 mrQTLs for 28 ratios were not significantly associated with either metabolite in the corresponding pair, highlighting the value of studying ratios over individual metabolites.

The heritability of 256 metabolite ratios was estimated to have a median value of 0.110 (**Figure S7c and Table S16**), with the taurocholic acid/bilirubin ratio being the highest (0.494, bile secretion pathway8), followed by L-alanine/L-glutamine (0.405, alanine, aspartate, and glutamate metabolism8). Similar to individual metabolites, ratio heritability was positively correlated with the number of mrQTLs (Pearson’s r = 0.16, *P* = 8.4 × 10-3), although the association was weaker than that for individual metabolites.

**Shared Causal Variants Across Molecular Traits with external eQTLs**

We performed colocalization analysis between CAS-meQTLs and eQTLs for the same gene, primarily focusing on 14,508,327 significant *cis*-meQTLs (*P* < 5 × 10-8), involving 2,121,167 SNPs and 170,047 CpG sites from our CAS cohort for the following analyses.

**References**

1. Suhre, K. *et al.* Connecting genetic risk to disease end points through the human blood plasma proteome. *Nat. Commun.* **8**, 14357 (2017).

2. The 1000 Genomes Project Consortium *et al.* A global reference for human genetic variation. *Nature* **526**, 68–74 (2015).

3. Chen, Y. *et al.* Genomic atlas of the plasma metabolome prioritizes metabolites implicated in human diseases. *Nat. Genet.* **55**, 44–53 (2023).

4. Wishart, D. S. *et al.* HMDB 5.0: the Human Metabolome Database for 2022. *Nucleic Acids Res.* **50**, D622–D631 (2022).

5. The Multiple Tissue Human Expression Resource (MuTHER) Consortium *et al.* An atlas of genetic influences on human blood metabolites. *Nat. Genet.* **46**, 543–550 (2014).

6. Wang, Z. *et al.* Genome‐wide association study of metabolites in patients with coronary artery disease identified novel metabolite quantitative trait loci. *Clin. Transl. Med.* **11**, e290 (2021).

7. CARDIoGRAM *et al.* Human metabolic individuality in biomedical and pharmaceutical research. *Nature* **477**, 54–60 (2011).

8. Kanehisa, M., Sato, Y., Kawashima, M., Furumichi, M. & Tanabe, M. KEGG as a reference resource for gene and protein annotation. *Nucleic Acids Res.* **44**, D457–D462 (2016).
